# Supplementary material for: Structural connectivity associations with dyslexia-linked genes identifies the left insula as the key phonological hub
Source: Research Square preprint supplement (doi:10.21203/rs.3.rs-8187892/v1), 2026-02-09
Supplement: Supplementary file 1 [file 1f39c90a6656014f96fd0c09.xlsx]

## Sheet: Supplementary table 1
Supplementary table 1
Associations Between Dyslexia and Dyslexia-related Polygenic Indices and Grey Matter Structure in UK Biobank dataset
Note. This table presents the associations between polygenic indices (PGI) for dyslexia/quantitative measures of reading and regional grey matter structure (cortical area, thickness, and volume) in the UK Biobank dataset. PGI thresholds (e.g., DYS_Pt_5e08) represent different p-value inclusion criteria used to construct the polygenic scores. Analyses were conducted separately for cortical area, t…
Polygenic score	Measure	ROIs	p_value	beta_std	sample_size	p_fdr	p_bonferroni
DYS_Pt_0_01	Volume	lh_fusiform	3.00968e-07	-0.02184	32542	2.55823e-05	2.55823e-05
DYS_Pt_0_01	Thickness	lh_fusiform	3.87401e-06	-0.0249249	32532	0.000263433	0.000263433
DYS_Pt_0_5	Volume	Brain_Stem	4.12046e-06	-0.0167713	32557	0.000268025	0.000350239
DYS_Pt_0_5	Volume	Right_VentralDC	6.30647e-06	-0.0157121	32557	0.000268025	0.00053605
DYS_Pt_1	Volume	Brain_Stem	5.8528e-06	-0.0165018	32557	0.000271628	0.000497488
DYS_Pt_1	Volume	Right_VentralDC	6.39125e-06	-0.0157007	32557	0.000271628	0.000543256
DYS_Pt_1	Volume	rh_superiortemporal	1.40859e-05	-0.0177286	32544	0.000399101	0.0011973
DYS_Pt_0_1	Volume	Right_VentralDC	5.68899e-06	-0.0157859	32557	0.000483564	0.000483564
DYS_Pt_0_1	Volume	Brain_Stem	1.17767e-05	-0.0159554	32557	0.00050051	0.00100102
DYS_Pt_0_5	Volume	rh_superiortemporal	1.78912e-05	-0.0175148	32544	0.000506917	0.00152075
DYS_Pt_1	Thickness	lh_lateraloccipital	7.73569e-06	-0.0243119	32551	0.000526027	0.000526027
DYS_Pt_0_01	Thickness	lh_lateraloccipital	1.58444e-05	-0.023434	32551	0.00053871	0.00107742
DYS_Pt_0_5	Thickness	lh_lateraloccipital	8.73198e-06	-0.0241732	32551	0.000593775	0.000593775
DYS_Pt_0_5	Volume	rh_transversetemporal	6.92913e-05	-0.0200524	32523	0.00147244	0.00588976
DYS_Pt_1	Volume	rh_transversetemporal	7.44722e-05	-0.0199638	32523	0.00158253	0.00633014
DYS_Pt_0_05	Volume	Right_VentralDC	2.55623e-05	-0.0146428	32557	0.0021728	0.0021728
DYS_Pt_0_01	Volume	rh_transversetemporal	5.75431e-05	-0.0202449	32523	0.00244558	0.00489116
DYS_Pt_0_01	Volume	lh_insula	8.93351e-05	-0.0162633	32549	0.00253116	0.00759348
DYS_Pt_0_05	Volume	lh_fusiform	6.66146e-05	-0.0170228	32542	0.00283112	0.00566224
DYS_Pt_1	Area	rh_pericalcarine	4.58e-05	0.0207796	32545	0.00311732	0.00311732
DYS_Pt_0_1	Volume	lh_fusiform	0.000120091	-0.0164193	32542	0.00340258	0.0102077
DYS_Pt_0_05	Volume	rh_precentral	0.000173863	-0.016131	32551	0.00484461	0.0147784
DYS_Pt_0_05	Volume	Brain_Stem	0.000240034	-0.0133717	32557	0.00484461	0.0204029
DYS_Pt_0_05	Volume	lh_insula	0.000284977	-0.0150794	32549	0.00484461	0.024223
DYS_Pt_1	Volume	Left_VentralDC	0.000285647	-0.0125924	32557	0.004856	0.02428
DYS_Pt_1	Volume	lh_insula	0.000372995	-0.0147915	32549	0.0052841	0.0317046
DYS_Pt_0_5	Volume	Left_VentralDC	0.000316382	-0.0125018	32557	0.00537849	0.0268925
DYS_Pt_0_001	Volume	lh_fusiform	6.48299e-05	-0.0170164	32542	0.00551054	0.00551054
DYS_Pt_1	Area	lh_pericalcarine	0.000162754	0.0194464	32544	0.00553364	0.0110673
DYS_Pt_0_5	Area	rh_pericalcarine	8.16e-05	0.0200868	32545	0.00555141	0.00555141
DYS_Pt_0_01	Volume	rh_superiortemporal	0.000271578	-0.0148455	32544	0.00577103	0.0230841
DYS_Pt_0_5	Volume	lh_insula	0.000411124	-0.0146864	32549	0.00582426	0.0349455
DYS_Pt_1	Volume	lh_fusiform	0.000515991	-0.0148251	32542	0.00622812	0.0438592
DYS_Pt_1	Volume	lh_superiortemporal	0.000586176	-0.014177	32546	0.00622812	0.049825
DYS_Pt_0_1	Volume	lh_insula	0.000316281	-0.0149701	32549	0.00668581	0.0268839
DYS_Pt_0_1	Volume	rh_transversetemporal	0.000393283	-0.0178624	32523	0.00668581	0.0334291
DYS_Pt_0_5	Volume	lh_fusiform	0.000584518	-0.014683	32542	0.00709772	0.049684
DYS_Pt_0_5	Area	lh_pericalcarine	0.000225232	0.0190262	32544	0.00765789	0.0153158
DYS_Pt_0_01	Thickness	lh_precentral	0.000350857	-0.0188583	32534	0.00795276	0.0238583
DYS_Pt_0_01	Volume	Right_VentralDC	0.000481986	-0.0121282	32557	0.00819376	0.0409688
DYS_Pt_0_05	Thickness	lh_fusiform	0.000129888	-0.0206777	32532	0.00883238	0.00883238
DYS_Pt_0_5	Volume	lh_superiortemporal	0.000897124	-0.0136961	32546	0.00953194	0.0762555
DYS_Pt_1	Thickness	rh_lateraloccipital	0.000286938	-0.0195989	32551	0.00975589	0.0195118
DYS_Pt_0_5	Thickness	rh_lateraloccipital	0.000303041	-0.0195246	32551	0.0103034	0.0206068
SP_Pt_0_1	Volume	rh_precentral	0.000210193	0.0159126	32551	0.0104127	0.0178664
SP_Pt_0_1	Volume	lh_precentral	0.000245005	0.0155629	32544	0.0104127	0.0208254
DYS_Pt_0_1	Thickness	lh_lateraloccipital	0.00015839	-0.020535	32551	0.0107705	0.0107705
DYS_Pt_0_1	Thickness	lh_fusiform	0.000413702	-0.019085	32532	0.0109465	0.0281317
DYS_Pt_0_1	Thickness	rh_precentral	0.000482936	-0.0184018	32525	0.0109465	0.0328396
DYS_Pt_5e08	Area	lh_superiorfrontal	0.000166275	-0.0134747	32546	0.0113067	0.0113067
DYS_Pt_1	Thickness	rh_precentral	0.000511226	-0.0183217	32525	0.0115878	0.0347634
DYS_Pt_0_1	Thickness	rh_cuneus	0.00070349	-0.0186328	32550	0.0119593	0.0478373
DYS_Pt_0_1	Thickness	rh_postcentral	0.00100344	-0.0175827	32553	0.0125071	0.0682341
DYS_Pt_0_1	Thickness	rh_lateraloccipital	0.00110357	-0.0176311	32551	0.0125071	0.0750428
DYS_Pt_0_05	Thickness	lh_lateraloccipital	0.000384853	-0.0192961	32551	0.013085	0.02617
DYS_Pt_1	Area	lh_lingual	0.000579487	0.0163092	32553	0.013135	0.0394051
DYS_Pt_5e08	Volume	Left_Thalamus_Proper	0.000157862	0.0129057	32557	0.0134183	0.0134183
DYS_Pt_1	Thickness	lh_fusiform	0.000797345	-0.0181267	32532	0.0135549	0.0542195
DYS_Pt_0_1	Volume	rh_superiortemporal	0.000993956	-0.0134413	32544	0.0136224	0.0844863
DYS_Pt_0_1	Volume	rh_precentral	0.00112184	-0.014002	32551	0.0136224	0.0953567
DYS_Pt_1	Thickness	lh_precentral	0.00101862	-0.0173556	32534	0.0138533	0.0692664
WR_Pt_0_05	Area	lh_insula	0.000203885	0.0151725	32541	0.0138642	0.0138642
DYS_Pt_0_5	Thickness	rh_precentral	0.000615717	-0.0180587	32525	0.0139563	0.0418688
DYS_Pt_0_05	Thickness	rh_cuneus	0.000889379	-0.0182728	32550	0.014751	0.0604778
DYS_Pt_0_05	Thickness	lh_precentral	0.00104847	-0.0173091	32534	0.014751	0.071296
DYS_Pt_0_05	Thickness	rh_precentral	0.00108463	-0.0172258	32525	0.014751	0.0737549
DYS_Pt_0_05	Volume	rh_transversetemporal	0.00105785	-0.0164995	32523	0.0149862	0.0899174
DYS_Pt_0_5	Thickness	lh_fusiform	0.000912798	-0.0179252	32532	0.0155176	0.0620703
DYS_Pt_0_5	Area	lh_lingual	0.000711734	0.0160453	32553	0.0161326	0.0483979
DYS_Pt_0_1	Thickness	lh_precentral	0.00168626	-0.0165907	32534	0.0163808	0.114666
DYS_Pt_5e08	Area	lh_rostralanteriorcingulate	0.00055863	-0.0150785	32533	0.0165464	0.0379868
DYS_Pt_5e08	Area	lh_insula	0.000729988	-0.0137447	32541	0.0165464	0.0496392
DYS_Pt_0_05	Volume	lh_superiortemporal	0.00136736	-0.0131991	32546	0.0166036	0.116225
DYS_Pt_0_05	Thickness	rh_lateraloccipital	0.00147712	-0.0171764	32551	0.0167407	0.100444
DYS_Pt_0_5	Thickness	lh_precentral	0.00130813	-0.0169815	32534	0.0177905	0.0889526
DYS_Pt_0_5	Thickness	rh_postcentral	0.0015938	-0.0168767	32553	0.018063	0.108378
DYS_Pt_1	Thickness	rh_supramarginal	0.00160114	-0.0166218	32524	0.0181463	0.108878
DYS_Pt_e05	Volume	lh_insula	0.000217459	-0.0153436	32549	0.018484	0.018484
DYS_Pt_1	Thickness	rh_postcentral	0.00207601	-0.0164586	32553	0.020167	0.141169
DYS_Pt_0_5	Thickness	rh_supramarginal	0.00210142	-0.0162012	32524	0.0204138	0.142896
DYS_Pt_1	Thickness	lh_inferiorparietal	0.00256413	-0.0159106	32518	0.0217951	0.174361
DYS_Pt_0_001	Volume	rh_transversetemporal	0.000529338	-0.0174261	32523	0.0224969	0.0449937
DYS_Pt_0_01	Thickness	lh_insula	0.00143487	-0.0174173	32554	0.0229686	0.097571
DYS_Pt_0_01	Thickness	rh_lateraloccipital	0.00168887	-0.0169466	32551	0.0229686	0.114843
DYS_Pt_0_01	Thickness	lh_postcentral	0.00203001	-0.0164547	32550	0.0230067	0.13804
DYS_Pt_0_001	Volume	lh_insula	0.000840783	-0.0138488	32549	0.0238222	0.0714666
DYS_Pt_0_5	Thickness	rh_cuneus	0.00346684	-0.0160769	32550	0.024721	0.235745
DYS_Pt_0_5	Thickness	lh_inferiorparietal	0.0035271	-0.015395	32518	0.024721	0.239843
DYS_Pt_0_5	Thickness	rh_inferiortemporal	0.00395839	-0.0157213	32541	0.024721	0.26917
DYS_Pt_0_5	Thickness	rh_superiortemporal	0.00399899	-0.0149316	32549	0.024721	0.271932
SP_Pt_0_5	Volume	lh_precentral	0.000308726	0.0153169	32544	0.0262417	0.0262417
DYS_Pt_0_1	Thickness	rh_supramarginal	0.00311932	-0.0155684	32524	0.0265142	0.212114
DYS_Pt_0_1	Volume	Left_VentralDC	0.00252931	-0.0104815	32557	0.0268739	0.214991
DYS_Pt_1	Thickness	rh_superiortemporal	0.00359358	-0.0151041	32549	0.0268896	0.244363
DYS_Pt_1	Thickness	rh_inferiortemporal	0.00395436	-0.0157215	32541	0.0268896	0.268896
DYS_Pt_0_1	Volume	rh_postcentral	0.00296339	-0.0131502	32537	0.0278885	0.251888
DYS_Pt_0_1	Volume	lh_superiortemporal	0.003281	-0.0121241	32546	0.0278885	0.278885
DYS_Pt_0_001	Thickness	lh_fusiform	0.000410812	-0.0190535	32532	0.0279352	0.0279352
DYS_Pt_1	Thickness	rh_cuneus	0.00454055	-0.0156076	32550	0.0280689	0.308757
DYS_Pt_0_01	Volume	lh_rostralanteriorcingulate	0.00203069	-0.0142021	32538	0.0287681	0.172609
DYS_Pt_0_001	Volume	rh_superiortemporal	0.00137004	-0.0130399	32544	0.0291133	0.116453
DYS_Pt_0_05	Volume	rh_lateraloccipital	0.00287706	-0.0126088	32548	0.0305688	0.24455
DYS_Pt_0_05	Volume	lh_precentral	0.00332081	-0.0124711	32544	0.0313632	0.282269
DYS_Pt_0_05	Volume	rh_superiortemporal	0.00380509	-0.0118129	32544	0.0323433	0.323433
DYS_Pt_1	Thickness	lh_insula	0.00608701	-0.0150089	32554	0.0330772	0.413916
DYS_Pt_1	Thickness	lh_supramarginal	0.00632359	-0.0143335	32530	0.0330772	0.430004
DYS_Pt_0_01	Volume	lh_lateraloccipital	0.00318868	-0.0125726	32538	0.0339752	0.271038
DYS_Pt_0_01	Volume	rh_lateraloccipital	0.0035613	-0.0123159	32548	0.0339752	0.302711
DYS_Pt_0_01	Volume	rh_inferiorparietal	0.00359737	-0.0122688	32547	0.0339752	0.305777
DYS_Pt_0_05	Volume	Left_VentralDC	0.00475798	-0.00979655	32557	0.0348934	0.404428
DYS_Pt_0_05	Volume	rh_postcentral	0.00492612	-0.0124412	32537	0.0348934	0.41872
SP_Pt_1	Volume	lh_precentral	0.000417757	0.0149832	32544	0.0355093	0.0355093
DYS_Pt_1	Thickness	rh_insula	0.00864612	-0.0143792	32551	0.038626	0.587936
DYS_Pt_1	Thickness	rh_middletemporal	0.0088746	-0.0141078	32550	0.038626	0.603473
DYS_Pt_1	Thickness	lh_postcentral	0.00923015	-0.0139011	32550	0.038626	0.62765
DYS_Pt_1	Thickness	lh_transversetemporal	0.00965651	-0.0143763	32552	0.038626	0.656643
DYS_Pt_0_01	Thickness	rh_fusiform	0.00398564	-0.0154444	32532	0.0387177	0.271024
SP_Pt_0_1	Volume	lh_caudalmiddlefrontal	0.00138037	0.0145738	32534	0.0391104	0.117331
DYS_Pt_0_05	Thickness	rh_postcentral	0.00408665	-0.0153449	32553	0.0396989	0.277892
DYS_Pt_0_1	Volume	rh_medialorbitofrontal	0.00519553	-0.0117132	32551	0.0401473	0.44162
DYS_Pt_0_01	Thickness	lh_paracentral	0.00521589	-0.0148503	32548	0.0408398	0.35468
DYS_Pt_0_01	Thickness	lh_transversetemporal	0.00540527	-0.0154329	32552	0.0408398	0.367558
DYS_Pt_0_01	Thickness	rh_cuneus	0.00600686	-0.0150896	32550	0.0408466	0.408466
DYS_Pt_0_001	Volume	lh_rostralanteriorcingulate	0.00242048	-0.013948	32538	0.0411481	0.20574
DYS_Pt_0_01	Thickness	rh_precentral	0.00673762	-0.0142681	32525	0.0416507	0.458158
DYS_Pt_0_01	Volume	rh_precentral	0.00525175	-0.0119802	32551	0.0446398	0.446398
DYS_Pt_1	Area	rh_cuneus	0.00265555	0.0139278	32539	0.0451443	0.180577
DYS_Pt_1	Volume	rh_pericalcarine	0.00489629	0.0144448	32532	0.0462428	0.416185
DYS_Pt_0_5	Thickness	rh_middletemporal	0.00886022	-0.0141122	32550	0.0468383	0.602495
DYS_Pt_0_5	Thickness	lh_supramarginal	0.00967943	-0.0135821	32530	0.0468383	0.658201
DYS_Pt_0_5	Thickness	rh_insula	0.0102207	-0.0140659	32551	0.0468383	0.695006
DYS_Pt_0_5	Thickness	lh_transversetemporal	0.0109579	-0.0141341	32552	0.0468383	0.745139
DYS_Pt_0_5	Thickness	lh_postcentral	0.0113767	-0.0135154	32550	0.0468383	0.773619
DYS_Pt_0_5	Thickness	lh_insula	0.0117096	-0.0137942	32554	0.0468383	0.796251
DYS_Pt_0_01	Thickness	lh_supramarginal	0.00827895	-0.0138425	32530	0.046914	0.562968
DYS_Pt_e05	Area	lh_insula	0.000693426	-0.0138129	32541	0.047153	0.047153
DYS_Pt_1	Thickness	rh_lateralorbitofrontal	0.012488	-0.0137487	32553	0.0471769	0.849184
DYS_Pt_0_01	Thickness	lh_inferiorparietal	0.0091533	-0.0137328	32518	0.0478788	0.622425
DYS_Pt_0_01	Thickness	lh_parsopercularis	0.00995013	-0.0137038	32536	0.0483292	0.676609
DYS_Pt_1	Thickness	lh_superiortemporal	0.0136927	-0.0129367	32549	0.0490055	0.931105
DYS_Pt_1	Thickness	lh_paracentral	0.0148893	-0.0129629	32548	0.0506237	1
DYS_Pt_1	Area	rh_transversetemporal	0.00440042	-0.0133744	32513	0.0506873	0.299229
DYS_Pt_1	Area	rh_lingual	0.00447241	0.0134147	32551	0.0506873	0.304124
SP_Pt_0_01	Area	lh_insula	0.000772667	0.0136812	32541	0.0525414	0.0525414
PA_Pt_0_001	Thickness	rh_pericalcarine	0.000779739	-0.0183631	32554	0.0530223	0.0530223
DYS_Pt_1	Volume	rh_medialorbitofrontal	0.00624572	-0.0114618	32551	0.0530886	0.530886
DYS_Pt_0_5	Volume	rh_precentral	0.00615003	-0.0117759	32551	0.0538332	0.522753
DYS_Pt_0_5	Volume	Right_Pallidum	0.00633331	-0.0111295	32557	0.0538332	0.538332
DYS_Pt_0_01	Thickness	rh_frontalpole	0.0119202	-0.0137549	32539	0.0540384	0.810576
DYS_Pt_1	Volume	rh_precentral	0.00725493	-0.0115394	32551	0.0543182	0.616669
DYS_Pt_1	Volume	lh_pericalcarine	0.00766845	0.0137593	32531	0.0543182	0.651819
DYS_Pt_0_05	Volume	rh_inferiorparietal	0.00837208	-0.0111234	32547	0.0547405	0.711627
DYS_Pt_0_1	Volume	rh_inferiorparietal	0.00775092	-0.0112354	32547	0.0549023	0.658828
DYS_Pt_0_1	Thickness	lh_supramarginal	0.00738903	-0.0140619	32530	0.0558282	0.502454
DYS_Pt_0_5	Volume	rh_pericalcarine	0.00728536	0.0137775	32532	0.056296	0.619256
DYS_Pt_1	Volume	Right_Pallidum	0.00863179	-0.0107057	32557	0.0564386	0.733702
DYS_Pt_5e08	Area	rh_insula	0.00336141	-0.0120266	32554	0.057144	0.228576
DYS_Pt_0_5	Area	rh_cuneus	0.00338019	0.0135855	32539	0.0574632	0.229853
DYS_Pt_0_5	Volume	rh_medialorbitofrontal	0.00825204	-0.0110731	32551	0.058452	0.701424
DYS_Pt_0_01	Thickness	lh_precuneus	0.0144652	-0.012864	32538	0.0594193	0.983635
DYS_Pt_0_01	Thickness	rh_postcentral	0.0148548	-0.0130034	32553	0.0594193	1
DYS_Pt_0_01	Thickness	lh_superiortemporal	0.015744	-0.0126552	32549	0.0594772	1
DYS_Pt_0_1	Thickness	lh_transversetemporal	0.00955506	-0.0143961	32552	0.0594932	0.649744
DYS_Pt_0_1	Thickness	rh_superiortemporal	0.00962391	-0.0134298	32549	0.0594932	0.654426
DYS_Pt_0_05	Thickness	lh_transversetemporal	0.00780836	-0.014775	32552	0.0594991	0.530968
DYS_Pt_0_05	Thickness	rh_supramarginal	0.00787488	-0.0139945	32524	0.0594991	0.535492
DYS_Pt_0_01	Volume	lh_superiortemporal	0.00776411	-0.0109636	32546	0.0599954	0.65995
DYS_Pt_0_01	Volume	lh_postcentral	0.00912767	-0.0113059	32541	0.0602374	0.775852
DYS_Pt_0_01	Volume	rh_medialorbitofrontal	0.00933781	-0.0108809	32551	0.0602374	0.793714
DYS_Pt_0_01	Volume	lh_precentral	0.0104268	-0.0108665	32544	0.0602374	0.886279
DYS_Pt_0_01	Volume	lh_inferiorparietal	0.0106301	-0.0113698	32544	0.0602374	0.903561
DYS_Pt_0_1	Thickness	rh_superiorfrontal	0.0115248	-0.0128968	32532	0.0602758	0.783684
DYS_Pt_0_1	Thickness	rh_fusiform	0.0117219	-0.0135372	32532	0.0602758	0.797087
DYS_Pt_0_1	Thickness	lh_parsopercularis	0.0134884	-0.0131524	32536	0.0602758	0.917211
DYS_Pt_0_1	Thickness	rh_inferiorparietal	0.0138133	-0.0128539	32522	0.0602758	0.939304
DYS_Pt_0_1	Thickness	lh_postcentral	0.0141825	-0.0130957	32550	0.0602758	0.964413
DYS_Pt_0_1	Thickness	lh_paracentral	0.0182558	-0.0125651	32548	0.0614121	1
DYS_Pt_0_1	Thickness	rh_inferiortemporal	0.0178026	-0.0129277	32541	0.0614121	1
DYS_Pt_0_1	Thickness	rh_insula	0.0189655	-0.0128482	32551	0.0614121	1
DYS_Pt_0_1	Thickness	rh_middletemporal	0.0185364	-0.0126944	32550	0.0614121	1
DYS_Pt_0_1	Thickness	rh_precuneus	0.0187183	-0.0124262	32538	0.0614121	1
DYS_Pt_0_05	Thickness	lh_parsopercularis	0.0090785	-0.0138869	32536	0.0617338	0.617338
DYS_Pt_0_5	Thickness	rh_inferiorparietal	0.0174297	-0.0124139	32522	0.0623799	1
DYS_Pt_0_5	Thickness	rh_lateralorbitofrontal	0.0172031	-0.0131132	32553	0.0623799	1
DYS_Pt_0_5	Thickness	lh_paracentral	0.0183891	-0.0125523	32548	0.0625229	1
DYS_Pt_0_5	Volume	lh_pericalcarine	0.00956459	0.0133729	32531	0.0625377	0.81299
DYS_Pt_5e08	Volume	rh_fusiform	0.00211463	-0.0128022	32548	0.0633939	0.179744
DYS_Pt_5e08	Volume	Right_Thalamus_Proper	0.00223743	0.0102764	32557	0.0633939	0.190182
DYS_Pt_0_05	Thickness	rh_fusiform	0.0103273	-0.0137722	32532	0.0638417	0.702259
NREAD_Pt_0_1	Area	lh_frontalpole	0.000939232	-0.01555	32542	0.0638678	0.0638678
DYS_Pt_0_05	Volume	lh_transversetemporal	0.0105815	-0.0129409	32524	0.0642446	0.899425
DYS_Pt_5e08	Area	rh_parstriangularis	0.00476855	-0.0133145	32525	0.0648523	0.324261
DYS_Pt_0_01	Volume	lh_bankssts	0.0123516	-0.012202	32491	0.0651014	1
DYS_Pt_0_01	Volume	lh_transversetemporal	0.0130203	-0.0125574	32524	0.0651014	1
DYS_Pt_5e08	Volume	rh_insula	0.00381323	-0.0117689	32550	0.0656242	0.324124
DYS_Pt_5e08	Volume	lh_insula	0.00386025	-0.0119803	32549	0.0656242	0.328121
DYS_Pt_0_1	Thickness	lh_inferiorparietal	0.0212573	-0.0121527	32518	0.0657045	1
DYS_Pt_0_1	Thickness	rh_parsopercularis	0.0231214	-0.0121521	32527	0.0683589	1
DYS_Pt_5e08	Volume	rh_transversetemporal	0.00484653	-0.0141616	32523	0.0686591	0.411955
DYS_Pt_0_05	Thickness	rh_inferiortemporal	0.0121422	-0.0136794	32541	0.0688057	0.825668
DYS_Pt_1	Thickness	rh_inferiorparietal	0.02129	-0.0120226	32522	0.0689392	1
NREAD_Pt_1	Area	rh_inferiorparietal	0.0010207	0.0138579	32541	0.0694077	0.0694077
DYS_Pt_0_01	Thickness	rh_superiortemporal	0.0194594	-0.0121046	32549	0.069644	1
DYS_Pt_0_05	Thickness	lh_paracentral	0.0154715	-0.012886	32548	0.0733768	1
DYS_Pt_0_05	Thickness	lh_postcentral	0.0152738	-0.0129502	32550	0.0733768	1
DYS_Pt_0_05	Thickness	lh_supramarginal	0.0161861	-0.0126208	32530	0.0733768	1
DYS_Pt_0_01	Volume	lh_medialorbitofrontal	0.0155578	-0.0103252	32547	0.0734675	1
DYS_Pt_0_5	Thickness	lh_superiortemporal	0.023073	-0.0119251	32549	0.0747126	1
DYS_Pt_5e08	Area	rh_medialorbitofrontal	0.00738289	-0.00999959	32555	0.0757153	0.502037
DYS_Pt_5e08	Area	rh_lateralorbitofrontal	0.00869976	-0.0106536	32550	0.0757153	0.591584
DYS_Pt_5e08	Area	rh_superiortemporal	0.00890768	-0.00996787	32540	0.0757153	0.605722
DYS_Pt_0_01	Thickness	rh_insula	0.0224671	-0.0124824	32551	0.0763881	1
DYS_Pt_0_5	Area	rh_transversetemporal	0.00563066	-0.0130029	32513	0.076577	0.382885
DYS_Pt_0_5	Thickness	rh_fusiform	0.025858	-0.0119701	32532	0.0767464	1
DYS_Pt_0_5	Thickness	rh_precuneus	0.0264492	-0.0117326	32538	0.0767464	1
DYS_Pt_0_5	Thickness	rh_superiorfrontal	0.027087	-0.0112847	32532	0.0767464	1
DYS_Pt_0_05	Thickness	lh_inferiorparietal	0.020071	-0.0122646	32518	0.0768854	1
DYS_Pt_0_05	Thickness	lh_superiortemporal	0.0187965	-0.012327	32549	0.0768854	1
DYS_Pt_0_05	Thickness	rh_superiortemporal	0.020352	-0.012031	32549	0.0768854	1
DYS_Pt_1	Thickness	lh_parsopercularis	0.0249895	-0.0119335	32536	0.0772403	1
DYS_Pt_0_5	Volume	Left_Pallidum	0.0130924	-0.010304	32557	0.0794893	1
NREAD_Pt_1	Thickness	rh_caudalanteriorcingulate	0.00118749	-0.0176843	32535	0.080749	0.080749
DYS_Pt_0_01	Thickness	rh_posteriorcingulate	0.0250092	-0.0121939	32530	0.0809821	1
DYS_Pt_0_05	Thickness	lh_insula	0.0226669	-0.0124673	32554	0.0811238	1
DYS_Pt_0_5	Area	rh_lingual	0.00721276	0.0126804	32551	0.0817446	0.490468
NREAD_Pt_0_5	Thickness	rh_caudalanteriorcingulate	0.0012433	-0.017612	32535	0.0845441	0.0845441
DYS_Pt_0_05	Thickness	rh_entorhinal	0.0262004	-0.0121817	32502	0.0848393	1
DYS_Pt_0_05	Thickness	rh_lateralorbitofrontal	0.0255256	-0.0122894	32553	0.0848393	1
DYS_Pt_0_1	Thickness	lh_insula	0.0327671	-0.0116814	32554	0.0856986	1
DYS_Pt_0_1	Thickness	lh_superiortemporal	0.0325219	-0.011219	32549	0.0856986	1
DYS_Pt_0_1	Thickness	rh_entorhinal	0.0320219	-0.0117506	32502	0.0856986	1
DYS_Pt_0_5	Volume	rh_postcentral	0.0151664	-0.0107483	32537	0.085943	1
DYS_Pt_0_01	Volume	lh_superiorfrontal	0.0198075	-0.00863315	32557	0.0871703	1
DYS_Pt_0_01	Volume	rh_fusiform	0.0205107	-0.00966186	32548	0.0871703	1
DYS_Pt_0_01	Thickness	lh_lingual	0.0311942	-0.0115945	32555	0.0876731	1
DYS_Pt_0_01	Thickness	lh_medialorbitofrontal	0.0288301	-0.0119738	32539	0.0876731	1
DYS_Pt_0_01	Thickness	rh_inferiortemporal	0.0322328	-0.0116677	32541	0.0876731	1
DYS_Pt_0_01	Thickness	rh_supramarginal	0.0298918	-0.0114231	32524	0.0876731	1
DYS_Pt_0_01	Thickness	rh_entorhinal	0.0338908	-0.0116108	32502	0.088564	1
DYS_Pt_0_01	Thickness	rh_middletemporal	0.0351651	-0.0113412	32550	0.088564	1
DYS_Pt_1	Thickness	rh_precuneus	0.0300383	-0.0114674	32538	0.088809	1
DYS_Pt_1	Thickness	rh_fusiform	0.0326199	-0.0114769	32532	0.0889553	1
DYS_Pt_1	Thickness	rh_paracentral	0.0334462	-0.0113535	32548	0.0889553	1
DYS_Pt_1	Thickness	rh_superiorfrontal	0.0340123	-0.0108224	32532	0.0889553	1
DYS_Pt_5e08	Area	lh_lingual	0.0117986	0.0119052	32553	0.0891447	0.802302
DYS_Pt_5e08	Volume	Right_Caudate	0.00827813	-0.012245	32557	0.08995	0.703641
DYS_Pt_5e08	Volume	rh_superiortemporal	0.00846588	-0.0107229	32544	0.08995	0.7196
DYS_Pt_0_1	Thickness	rh_lateralorbitofrontal	0.0357309	-0.0115577	32553	0.089989	1
DYS_Pt_0_001	Thickness	rh_lateraloccipital	0.00307878	-0.0159596	32551	0.0911026	0.209357
DYS_Pt_0_001	Thickness	lh_lateraloccipital	0.00401923	-0.0156045	32551	0.0911026	0.273308
DYS_Pt_0_1	Volume	rh_lateraloccipital	0.0139475	-0.0104029	32548	0.0911949	1
DYS_Pt_0_05	Thickness	rh_insula	0.0298803	-0.0118903	32551	0.0923573	1
DYS_Pt_0_1	Volume	Left_Pallidum	0.0154867	-0.0100517	32557	0.0926658	1
DYS_Pt_0_1	Volume	lh_precentral	0.0163528	-0.0101992	32544	0.0926658	1
DYS_Pt_0_1	Thickness	rh_paracentral	0.0383476	-0.0110565	32548	0.0931299	1
DYS_Pt_0_001	Volume	rh_insula	0.0066558	-0.0110418	32550	0.0942905	0.565743
DYS_Pt_5e08	Area	lh_rostralmiddlefrontal	0.0152079	-0.0089506	32547	0.0949838	1
DYS_Pt_5e08	Area	rh_precuneus	0.015365	-0.00939806	32533	0.0949838	1
DYS_Pt_0_01	Thickness	lh_isthmuscingulate	0.0420251	-0.0110433	32545	0.0952568	1
DYS_Pt_0_01	Thickness	lh_rostralanteriorcingulate	0.0400468	-0.0110464	32548	0.0952568	1
DYS_Pt_0_01	Thickness	rh_lateralorbitofrontal	0.0411016	-0.0112267	32553	0.0952568	1
DYS_Pt_5e08	Thickness	lh_parsorbitalis	0.00264677	0.0162624	32541	0.0962627	0.17998
DYS_Pt_5e08	Thickness	rh_parsorbitalis	0.00306889	0.0159494	32536	0.0962627	0.208684
DYS_Pt_5e08	Thickness	rh_lateralorbitofrontal	0.00424688	0.0156968	32553	0.0962627	0.288788
DYS_Pt_0_01	Volume	rh_insula	0.0239044	-0.00919883	32550	0.0967561	1
DYS_Pt_1	Volume	Left_Pallidum	0.0159632	-0.0100062	32557	0.0969192	1
DYS_Pt_0_05	Volume	lh_superiorfrontal	0.0178761	-0.0087845	32557	0.0972056	1
DYS_Pt_0_05	Volume	rh_medialorbitofrontal	0.0182975	-0.0098878	32551	0.0972056	1
DYS_Pt_1	Volume	Left_Hippocampus	0.0185628	-0.00960783	32557	0.0986149	1
DYS_Pt_1	Volume	Right_Hippocampus	0.0178556	-0.00971058	32557	0.0986149	1
DYS_Pt_0_01	Thickness	rh_isthmuscingulate	0.0466001	-0.0107623	32536	0.0990253	1
DYS_Pt_0_01	Thickness	rh_paracentral	0.0462678	-0.0106252	32548	0.0990253	1
DYS_Pt_5e08	Volume	lh_rostralanteriorcingulate	0.0108151	-0.0117164	32538	0.0990933	0.919283
DYS_Pt_5e08	Volume	lh_superiorfrontal	0.011658	-0.00933473	32557	0.0990933	0.990933
DYS_Pt_0_5	Thickness	lh_parsopercularis	0.0389762	-0.0109917	32536	0.106015	1
DYS_Pt_0_01	Volume	lh_paracentral	0.0277843	-0.0103725	32530	0.107348	1
DYS_Pt_0_5	Thickness	rh_paracentral	0.0414109	-0.0108885	32548	0.108305	1
NREAD_Pt_1	Area	lh_inferiorparietal	0.00322447	0.0129771	32535	0.109632	0.219264
DYS_Pt_1	Area	lh_cuneus	0.0140717	0.0118483	32533	0.110833	0.956876
DYS_Pt_1	Area	lh_frontalpole	0.014628	0.0114783	32542	0.110833	0.994706
DYS_Pt_1	Area	lh_superiorparietal	0.014669	0.0107209	32546	0.110833	0.997493
DYS_Pt_0_001	Volume	lh_transversetemporal	0.00928109	-0.0131443	32524	0.112699	0.788893
DYS_Pt_5e08	Area	lh_isthmuscingulate	0.0222392	0.00967251	32523	0.113335	1
DYS_Pt_5e08	Area	rh_cuneus	0.0226943	0.0105343	32539	0.113335	1
DYS_Pt_5e08	Area	rh_fusiform	0.0233336	-0.00885911	32548	0.113335	1
DYS_Pt_1	Volume	rh_postcentral	0.0227423	-0.0100805	32537	0.113712	1
WR_Pt_1e05	Area	lh_precuneus	0.00167317	-0.0124995	32538	0.113776	0.113776
DYS_Pt_0_1	Volume	lh_transversetemporal	0.0217206	-0.0116219	32524	0.115391	1
DYS_Pt_0_01	Volume	rh_posteriorcingulate	0.0317355	-0.0101022	32538	0.117283	1
DYS_Pt_5e05	Area	lh_insula	0.00172631	-0.012758	32541	0.117389	0.117389
DYS_Pt_0_05	Volume	lh_rostralanteriorcingulate	0.023672	-0.0104246	32538	0.11836	1
DYS_Pt_0_01	Volume	Left_Pallidum	0.0355116	-0.00871868	32557	0.120739	1
DYS_Pt_0_01	Volume	lh_posteriorcingulate	0.0350071	-0.0100284	32534	0.120739	1
DYS_Pt_0_05	Thickness	rh_inferiorparietal	0.0419172	-0.010619	32522	0.121868	1
DYS_Pt_0_05	Thickness	rh_isthmuscingulate	0.043118	-0.0109512	32536	0.121868	1
DYS_Pt_0_05	Thickness	rh_precuneus	0.0448043	-0.010603	32538	0.121868	1
DYS_Pt_0_05	Thickness	rh_parsopercularis	0.047568	-0.0105975	32527	0.124409	1
DYS_Pt_0_5	Area	lh_frontalpole	0.0145245	0.0114915	32542	0.126001	0.987663
DYS_Pt_0_5	Area	lh_cuneus	0.016838	0.0115349	32533	0.126001	1
DYS_Pt_0_5	Area	lh_superiorparietal	0.0176012	0.0104296	32546	0.126001	1
DYS_Pt_0_5	Area	rh_superiortemporal	0.0185295	-0.00899782	32540	0.126001	1
DYS_Pt_1	Area	rh_superiortemporal	0.0189401	-0.00896574	32540	0.128793	1
DYS_Pt_0_05	Volume	Left_Pallidum	0.0274657	-0.00915335	32557	0.129699	1
DYS_Pt_0_05	Thickness	lh_lingual	0.055325	-0.0103239	32555	0.129727	1
DYS_Pt_0_05	Thickness	rh_frontalpole	0.0546847	-0.0105223	32539	0.129727	1
DYS_Pt_0_05	Thickness	rh_middletemporal	0.0523978	-0.0104559	32550	0.129727	1
NREAD_Pt_0_05	Volume	Right_Caudate	0.00154184	-0.0147035	32557	0.131057	0.131057
PA_Pt_1	Area	lh_middletemporal	0.00193427	0.0121027	32547	0.13153	0.13153
DYS_Pt_0_01	Thickness	lh_frontalpole	0.0639958	-0.0101282	32525	0.13187	1
WR_Pt_0_01	Volume	Right_Pallidum	0.00208456	0.0125432	32557	0.132273	0.177187
WR_Pt_0_01	Volume	rh_transversetemporal	0.00311231	0.014896	32523	0.132273	0.264546
DYS_Pt_5e08	Area	lh_lateralorbitofrontal	0.0295256	-0.00808995	32548	0.133849	1
DYS_Pt_0_1	Thickness	rh_frontalpole	0.0572396	-0.0104154	32539	0.134217	1
DYS_Pt_0_01	Volume	rh_frontalpole	0.0411303	-0.0106448	32501	0.134464	1
DYS_Pt_1	Volume	lh_superiorfrontal	0.028849	-0.00810887	32557	0.136231	1
DYS_Pt_1	Volume	rh_inferiorparietal	0.0320922	-0.00904391	32547	0.136751	1
DYS_Pt_1	Volume	rh_lingual	0.0321767	0.0105795	32550	0.136751	1
DYS_Pt_5e05	Volume	rh_fusiform	0.00163064	-0.0131293	32548	0.13693	0.138604
DYS_Pt_5e05	Volume	lh_insula	0.00322188	-0.012221	32549	0.13693	0.27386
DYS_Pt_5e08	Area	lh_medialorbitofrontal	0.0342722	-0.00837601	32549	0.137089	1
DYS_Pt_5e08	Area	rh_superiorfrontal	0.033749	-0.00764998	32544	0.137089	1
DYS_Pt_0_01	Thickness	lh_cuneus	0.0690817	-0.00995169	32557	0.138163	1
DYS_Pt_0_01	Area	rh_transversetemporal	0.00288976	-0.0139722	32513	0.139212	0.196504
DYS_Pt_0_01	Area	lh_pericalcarine	0.00450135	0.014631	32544	0.139212	0.306092
DYS_Pt_0_01	Area	rh_pericalcarine	0.0077971	0.0135477	32545	0.139212	0.530203
DYS_Pt_0_01	Area	lh_lingual	0.00818891	0.012516	32553	0.139212	0.556846
NREAD_Pt_0_01	Area	rh_inferiorparietal	0.00206147	0.012962	32541	0.14018	0.14018
NREAD_Pt_5e05	Volume	rh_caudalanteriorcingulate	0.00442979	0.0151448	32523	0.140803	0.376532
NREAD_Pt_5e05	Volume	rh_posteriorcingulate	0.00464162	0.0132927	32538	0.140803	0.394538
NREAD_Pt_5e05	Volume	lh_parsorbitalis	0.00496952	0.0130965	32540	0.140803	0.422409
SP_Pt_0_05	Area	lh_caudalmiddlefrontal	0.00245462	0.0136342	32527	0.140878	0.166914
SP_Pt_0_05	Area	lh_inferiorparietal	0.00459533	0.0124536	32535	0.140878	0.312483
SP_Pt_0_05	Area	rh_caudalanteriorcingulate	0.0103335	0.0129139	32494	0.140878	0.702675
SP_Pt_0_05	Area	lh_lingual	0.0130745	-0.0117389	32553	0.140878	0.889066
SP_Pt_0_05	Area	rh_parstriangularis	0.0131048	0.0117094	32525	0.140878	0.891128
SP_Pt_0_05	Area	lh_insula	0.0135666	0.0100492	32541	0.140878	0.922529
SP_Pt_0_05	Area	rh_parsopercularis	0.0145021	0.0116736	32498	0.140878	0.986143
DYS_Pt_0_05	Thickness	rh_superiorfrontal	0.0626426	-0.00950225	32532	0.14199	1
DYS_Pt_0_01	Volume	lh_middletemporal	0.0455803	-0.0082331	32546	0.143494	1
PA_Pt_e05	Area	rh_rostralmiddlefrontal	0.00362887	0.0109079	32542	0.143717	0.246763
PA_Pt_e05	Area	rh_cuneus	0.00422698	0.0132222	32539	0.143717	0.287434
DYS_Pt_0_5	Thickness	rh_entorhinal	0.0572196	-0.0104229	32502	0.144109	1
DYS_Pt_0_5	Volume	rh_inferiorparietal	0.0273033	-0.00931443	32547	0.145049	1
DYS_Pt_0_5	Area	rh_superiorparietal	0.0237408	0.00967727	32542	0.146761	1
DYS_Pt_1	Thickness	lh_lateralorbitofrontal	0.0588761	-0.0103904	32541	0.147436	1
DYS_Pt_1	Thickness	rh_entorhinal	0.0607091	-0.0102792	32502	0.147436	1
DYS_Pt_0_5	Volume	Left_Hippocampus	0.0310631	-0.00880098	32557	0.147532	1
DYS_Pt_0_5	Volume	rh_lateraloccipital	0.031242	-0.00911513	32548	0.147532	1
DYS_Pt_1	Volume	lh_lateraloccipital	0.0408523	-0.00873087	32538	0.150976	1
DYS_Pt_1	Volume	lh_precentral	0.0405088	-0.00870243	32544	0.150976	1
DYS_Pt_1	Volume	rh_lateraloccipital	0.0377422	-0.00879124	32548	0.150976	1
DYS_Pt_0_5	Volume	lh_superiorfrontal	0.034315	-0.00785295	32557	0.153514	1
SP_Pt_0_05	Area	rh_lingual	0.0181881	-0.0111223	32551	0.154599	1
DYS_Pt_0_05	Thickness	lh_cuneus	0.0728118	-0.00983198	32557	0.154725	1
DYS_Pt_0_05	Thickness	lh_precuneus	0.0720579	-0.00947278	32538	0.154725	1
DYS_Pt_0_001	Volume	rh_fusiform	0.0172595	-0.00992117	32548	0.15564	1
DYS_Pt_0_001	Volume	rh_precentral	0.0149775	-0.0104336	32551	0.15564	1
DYS_Pt_0_001	Volume	Right_VentralDC	0.0183105	-0.00819074	32557	0.15564	1
DYS_Pt_5e05	Volume	lh_fusiform	0.00559193	-0.0118074	32542	0.158438	0.475314
NREP_Pt_1	Volume	rh_transversetemporal	0.00234097	0.0153478	32523	0.159095	0.198983
NREP_Pt_1	Volume	rh_superiortemporal	0.00374341	0.0118448	32544	0.159095	0.31819
PA_Pt_5e05	Area	lh_cuneus	0.00302283	0.014276	32533	0.159832	0.205552
PA_Pt_5e05	Area	lh_lingual	0.00470094	0.0133676	32553	0.159832	0.319664
PA_Pt_e05	Area	rh_isthmuscingulate	0.0110648	0.0109703	32527	0.160621	0.752404
PA_Pt_e05	Area	rh_pericalcarine	0.0134081	0.0125726	32545	0.160621	0.911748
PA_Pt_e05	Area	lh_pericalcarine	0.0145048	0.0125726	32544	0.160621	0.986327
PA_Pt_e05	Area	lh_superiorfrontal	0.0188966	0.00839948	32546	0.160621	1
PA_Pt_e05	Area	rh_lingual	0.0187339	0.0110625	32551	0.160621	1
PA_Pt_e05	Area	rh_middletemporal	0.0182823	0.00883425	32540	0.160621	1
DYS_Pt_0_5	Volume	Right_Hippocampus	0.0380976	-0.00850294	32557	0.161915	1
DYS_Pt_e05	Volume	rh_superiortemporal	0.00558933	-0.0112939	32544	0.163872	0.475093
DYS_Pt_e05	Volume	rh_fusiform	0.0072054	-0.0112015	32548	0.163872	0.612459
DYS_Pt_e05	Volume	lh_superiorparietal	0.00816467	0.0115823	32548	0.163872	0.693997
DYS_Pt_e05	Volume	rh_insula	0.00963953	-0.0105378	32550	0.163872	0.81936
SP_Pt_0_05	Volume	lh_caudalmiddlefrontal	0.00193308	0.0141115	32534	0.164312	0.164312
DYS_Pt_0_05	Volume	lh_lateraloccipital	0.0388363	-0.00881809	32538	0.165054	1
DYS_Pt_0_05	Volume	rh_paracentral	0.0386993	-0.00977148	32526	0.165054	1
DYS_Pt_0_05	Thickness	rh_posteriorcingulate	0.0801069	-0.00953213	32530	0.165069	1
DYS_Pt_0_01	Thickness	lh_pericalcarine	0.0870075	-0.00933007	32551	0.165271	1
DYS_Pt_0_01	Thickness	rh_precuneus	0.0874962	-0.00901974	32538	0.165271	1
DYS_Pt_0_01	Thickness	lh_entorhinal	0.102268	-0.00894751	32468	0.165577	1
DYS_Pt_0_01	Thickness	lh_lateralorbitofrontal	0.10092	-0.00901043	32541	0.165577	1
DYS_Pt_0_01	Thickness	lh_posteriorcingulate	0.0929206	-0.00919643	32545	0.165577	1
DYS_Pt_0_01	Thickness	lh_superiorfrontal	0.0913322	-0.0085866	32527	0.165577	1
DYS_Pt_0_01	Thickness	rh_parsopercularis	0.100007	-0.00878848	32527	0.165577	1
DYS_Pt_0_01	Thickness	rh_superiorfrontal	0.0978909	-0.00843864	32532	0.165577	1
DYS_Pt_5e05	Volume	rh_superiortemporal	0.00783313	-0.0108362	32544	0.166454	0.665816
DYS_Pt_0_01	Volume	Left_VentralDC	0.0580886	-0.00656917	32557	0.166626	1
DYS_Pt_0_01	Volume	rh_middletemporal	0.0588091	-0.00748338	32550	0.166626	1
DYS_Pt_0_01	Volume	rh_postcentral	0.0573856	-0.00839931	32537	0.166626	1
DYS_Pt_0_01	Thickness	lh_middletemporal	0.106005	-0.00870802	32541	0.167635	1
DYS_Pt_5e08	Area	lh_entorhinal	0.0451589	-0.0102496	32528	0.1706	1
DYS_Pt_1	Volume	rh_insula	0.0484135	-0.00804916	32550	0.171465	1
DYS_Pt_5e08	Volume	Left_Caudate	0.0222071	-0.0107924	32557	0.1716	1
DYS_Pt_0_05	Volume	lh_bankssts	0.0445975	-0.00980628	32491	0.173362	1
DYS_Pt_0_05	Volume	lh_postcentral	0.0448701	-0.00870806	32541	0.173362	1
DYS_Pt_e05	Volume	Left_Accumbens_area	0.0122417	0.01089	32557	0.173424	1
PA_Pt_0_001	Thickness	rh_cuneus	0.00512621	-0.0153512	32550	0.174291	0.348582
NREAD_Pt_0_05	Volume	Right_Putamen	0.00471366	-0.0120158	32557	0.178931	0.400661
NREAD_Pt_0_05	Volume	rh_inferiorparietal	0.00763951	0.0112422	32547	0.178931	0.649358
NREAD_Pt_0_05	Volume	Left_Caudate	0.0084203	-0.0124501	32557	0.178931	0.715725
SP_Pt_0_05	Area	rh_posteriorcingulate	0.0238207	0.0100294	32530	0.179978	1
DYS_Pt_0_5	Volume	lh_lateraloccipital	0.0445222	-0.00857854	32538	0.180209	1
DYS_Pt_0_001	Thickness	rh_cuneus	0.0106503	-0.0140151	32550	0.181056	0.724222
DYS_Pt_0_1	Thickness	lh_precuneus	0.0825157	-0.00914546	32538	0.181144	1
DYS_Pt_0_1	Thickness	rh_isthmuscingulate	0.085143	-0.00932339	32536	0.181144	1
DYS_Pt_0_1	Thickness	rh_rostralmiddlefrontal	0.0852444	-0.00910558	32532	0.181144	1
DYS_Pt_0_5	Area	lh_inferiortemporal	0.0319879	0.00874125	32541	0.181265	1
NREAD_Pt_5e05	Volume	Right_Accumbens_area	0.0085641	0.0116002	32557	0.181987	0.727949
DYS_Pt_0_01	Thickness	rh_inferiorparietal	0.119009	-0.00812828	32522	0.183923	1
NREAD_Pt_0_5	Area	rh_inferiorparietal	0.00271494	0.012649	32541	0.184616	0.184616
DYS_Pt_0_5	Volume	lh_bankssts	0.0575243	-0.0092764	32491	0.184689	1
DYS_Pt_0_5	Volume	lh_inferiorparietal	0.0555003	-0.00853518	32544	0.184689	1
DYS_Pt_0_5	Volume	lh_precentral	0.0500915	-0.00832376	32544	0.184689	1
DYS_Pt_0_5	Volume	rh_insula	0.0586661	-0.00771133	32550	0.184689	1
DYS_Pt_0_5	Volume	rh_lateralorbitofrontal	0.0527805	-0.00783414	32544	0.184689	1
DYS_Pt_0_5	Volume	rh_lingual	0.0512926	0.00962644	32550	0.184689	1
DYS_Pt_e05	Area	lh_rostralanteriorcingulate	0.00546581	-0.0121491	32533	0.185838	0.371675
WR_Pt_1e05	Area	lh_superiorparietal	0.00787955	-0.0116465	32546	0.18679	0.53581
WR_Pt_1e05	Area	rh_postcentral	0.0108157	-0.0101655	32533	0.18679	0.735471
WR_Pt_1e05	Area	lh_supramarginal	0.0109877	-0.0107878	32533	0.18679	0.74716
DYS_Pt_0_1	Volume	lh_bankssts	0.0410708	-0.00997607	32491	0.187579	1
DYS_Pt_0_1	Volume	lh_pericalcarine	0.0419295	0.0104974	32531	0.187579	1
DYS_Pt_0_1	Volume	lh_postcentral	0.0403827	-0.0089005	32541	0.187579	1
DYS_Pt_e05	Area	lh_superiorfrontal	0.00832335	-0.00945053	32546	0.188663	0.565988
DYS_Pt_5e08	Area	rh_lingual	0.0533682	0.00909384	32551	0.191002	1
DYS_Pt_1	Area	rh_superiorparietal	0.0309527	0.00923294	32542	0.191344	1
DYS_Pt_0_5	Thickness	rh_bankssts	0.0793142	-0.00955577	32551	0.19262	1
WR_Pt_0_5	Thickness	lh_transversetemporal	0.00287921	0.0166368	32552	0.195786	0.195786
DYS_Pt_0_05	Area	rh_isthmuscingulate	0.00289464	0.0128945	32527	0.196835	0.196835
SP_Pt_1e05	Volume	Right_Thalamus_Proper	0.00378682	0.00973118	32557	0.198995	0.32188
SP_Pt_1e05	Volume	lh_parstriangularis	0.00468224	-0.0135135	32535	0.198995	0.39799
DYS_Pt_0_01	Volume	rh_inferiortemporal	0.0729473	-0.00732844	32544	0.200017	1
SP_Pt_0_05	Area	lh_pericalcarine	0.0359638	-0.010795	32544	0.200744	1
SP_Pt_0_05	Area	lh_rostralmiddlefrontal	0.0376819	0.00766712	32547	0.200744	1
SP_Pt_0_05	Area	rh_medialorbitofrontal	0.0411824	0.00762443	32555	0.200744	1
SP_Pt_0_05	Area	rh_pericalcarine	0.0413297	-0.0103811	32545	0.200744	1
SP_Pt_0_05	Area	rh_superiortemporal	0.0353591	0.00802314	32540	0.200744	1
DYS_Pt_0_001	Volume	Left_Pallidum	0.0332646	-0.00882048	32557	0.20123	1
DYS_Pt_0_001	Volume	lh_medialorbitofrontal	0.0350277	-0.00898976	32547	0.20123	1
DYS_Pt_0_001	Volume	rh_parstriangularis	0.0278707	-0.0104521	32535	0.20123	1
DYS_Pt_0_001	Volume	rh_posteriorcingulate	0.0304149	-0.0101728	32538	0.20123	1
DYS_Pt_0_001	Volume	rh_superiorfrontal	0.0355111	-0.00782771	32542	0.20123	1
DYS_Pt_5e08	Area	rh_isthmuscingulate	0.0596114	0.00813572	32527	0.202679	1
DYS_Pt_0_001	Thickness	lh_precentral	0.0209993	-0.0121666	32534	0.20275	1
DYS_Pt_0_001	Thickness	rh_inferiortemporal	0.0157526	-0.013144	32541	0.20275	1
DYS_Pt_0_001	Thickness	rh_middletemporal	0.0238529	-0.0121546	32550	0.20275	1
DYS_Pt_0_001	Thickness	rh_precentral	0.019419	-0.0122981	32525	0.20275	1
WR_Pt_0_05	Volume	lh_postcentral	0.00454588	0.0123396	32541	0.203101	0.3864
WR_Pt_0_05	Volume	lh_insula	0.00477885	0.0117464	32549	0.203101	0.406203
WR_Pt_0_1	Area	lh_insula	0.00331859	0.012018	32541	0.205143	0.225664
WR_Pt_0_1	Area	rh_superiortemporal	0.00603362	0.0105257	32540	0.205143	0.410286
DYS_Pt_0_5	Thickness	lh_lateralorbitofrontal	0.0894753	-0.00934113	32541	0.209804	1
DYS_Pt_1	Volume	lh_transversetemporal	0.0618132	-0.00945734	32524	0.210165	1
PA_Pt_5e05	Area	rh_rostralmiddlefrontal	0.00930449	0.00975716	32542	0.210902	0.632705
WR_Pt_1e05	Thickness	lh_inferiortemporal	0.00840721	0.0143795	32546	0.211413	0.57169
WR_Pt_1e05	Thickness	lh_precuneus	0.0094077	0.0136476	32538	0.211413	0.639724
WR_Pt_1e05	Thickness	lh_rostralmiddlefrontal	0.0100656	0.0134214	32533	0.211413	0.684462
WR_Pt_1e05	Thickness	lh_parstriangularis	0.0129012	0.0132168	32539	0.211413	0.877282
WR_Pt_1e05	Thickness	lh_caudalanteriorcingulate	0.0155451	0.0130937	32554	0.211413	1
SP_Pt_0_1	Volume	Right_Thalamus_Proper	0.00995688	0.00867761	32557	0.211584	0.846334
PA_Pt_0_001	Volume	Right_VentralDC	0.00256001	-0.0104652	32557	0.211663	0.217601
PA_Pt_0_001	Volume	Brain_Stem	0.0049803	-0.0101992	32557	0.211663	0.423325
NREP_Pt_5e05	Volume	lh_lateralorbitofrontal	0.00249422	0.011885	32553	0.212008	0.212008
DYS_Pt_0_05	Volume	rh_frontalpole	0.0574246	-0.00991499	32501	0.212221	1
DYS_Pt_0_5	Thickness	lh_cuneus	0.108411	-0.00880102	32557	0.213904	1
DYS_Pt_0_5	Thickness	lh_precuneus	0.104123	-0.00856144	32538	0.213904	1
DYS_Pt_0_5	Thickness	rh_caudalmiddlefrontal	0.107284	-0.00849665	32529	0.213904	1
DYS_Pt_0_5	Thickness	rh_medialorbitofrontal	0.108163	-0.00883446	32542	0.213904	1
DYS_Pt_0_5	Thickness	rh_parsopercularis	0.100771	-0.00878138	32527	0.213904	1
DYS_Pt_0_5	Thickness	rh_transversetemporal	0.110098	-0.00887205	32553	0.213904	1
DYS_Pt_0_001	Volume	lh_posteriorcingulate	0.0480707	-0.00939457	32534	0.215053	1
DYS_Pt_0_001	Volume	lh_superiorfrontal	0.0450827	-0.00741853	32557	0.215053	1
DYS_Pt_0_001	Volume	lh_superiorparietal	0.0455888	0.00874984	32548	0.215053	1
DYS_Pt_0_001	Volume	rh_medialorbitofrontal	0.0458931	-0.00834947	32551	0.215053	1
DYS_Pt_e05	Area	rh_insula	0.0127181	-0.0102261	32554	0.216207	0.864828
DYS_Pt_e05	Area	rh_parstriangularis	0.0191165	-0.0110636	32525	0.216653	1
DYS_Pt_e05	Area	rh_superiorparietal	0.0178328	0.0101197	32542	0.216653	1
DYS_Pt_1	Thickness	lh_precuneus	0.100873	-0.00864197	32538	0.217657	1
DYS_Pt_1	Thickness	lh_superiorfrontal	0.102427	-0.00831678	32527	0.217657	1
DYS_Pt_1	Thickness	rh_bankssts	0.100723	-0.00893778	32551	0.217657	1
DYS_Pt_1	Thickness	rh_parsopercularis	0.0949535	-0.00893407	32527	0.217657	1
DYS_Pt_0_001	Area	lh_lingual	0.00714567	0.0127218	32553	0.218046	0.485906
DYS_Pt_0_001	Area	lh_rostralanteriorcingulate	0.00835069	-0.0115287	32533	0.218046	0.567847
DYS_Pt_0_001	Area	rh_parstriangularis	0.00961968	-0.0122188	32525	0.218046	0.654139
DYS_Pt_0_1	Volume	lh_medialorbitofrontal	0.0516573	-0.00831686	32547	0.219543	1
DYS_Pt_0_05	Thickness	rh_paracentral	0.109952	-0.00853144	32548	0.219904	1
NREAD_Pt_1	Area	lh_parstriangularis	0.00974795	-0.0122581	32536	0.220953	0.66286
DYS_Pt_0_5	Area	rh_isthmuscingulate	0.0428839	0.00876851	32527	0.224316	1
PA_Pt_e05	Area	lh_lingual	0.0297437	0.0102735	32553	0.224731	1
NREAD_Pt_0_05	Area	lh_frontalpole	0.00364132	-0.0136531	32542	0.225539	0.24761
NREAD_Pt_0_05	Area	rh_inferiorparietal	0.00663351	0.0114321	32541	0.225539	0.451078
DYS_Pt_0_01	Volume	rh_paracentral	0.0850169	-0.00813159	32526	0.225826	1
DYS_Pt_e05	Area	lh_lingual	0.0247639	0.0106227	32553	0.227141	1
DYS_Pt_e05	Area	rh_medialorbitofrontal	0.0267225	-0.00827615	32555	0.227141	1
NREP_Pt_0_001	Volume	Right_Accumbens_area	0.00378765	0.0127775	32557	0.227227	0.32195
NREP_Pt_0_001	Volume	rh_precentral	0.00534652	0.0119371	32551	0.227227	0.454454
WR_Pt_1e05	Area	lh_rostralmiddlefrontal	0.0167658	-0.0088217	32547	0.228015	1
NREP_Pt_5e05	Area	lh_lateralorbitofrontal	0.00460296	0.010538	32548	0.228165	0.313002
NREP_Pt_5e05	Area	lh_parstriangularis	0.00712798	0.0127283	32536	0.228165	0.484702
NREP_Pt_5e05	Area	rh_transversetemporal	0.0117959	0.0118024	32513	0.228165	0.80212
NREP_Pt_5e05	Area	lh_parsopercularis	0.0139526	0.0119085	32479	0.228165	0.948775
NREP_Pt_5e05	Area	lh_insula	0.0197422	0.00949049	32541	0.228165	1
NREP_Pt_5e05	Area	lh_parsorbitalis	0.0234876	0.0097415	32545	0.228165	1
NREP_Pt_5e05	Area	rh_lateralorbitofrontal	0.0204086	0.00942051	32550	0.228165	1
NREAD_Pt_1	Area	lh_bankssts	0.0134234	0.0119436	32486	0.228198	0.912794
DYS_Pt_0_05	Volume	rh_fusiform	0.0649283	-0.00770596	32548	0.229954	1
SP_Pt_0_05	Volume	rh_precentral	0.00877894	0.0112399	32551	0.230538	0.74621
SP_Pt_0_05	Volume	lh_precentral	0.0101251	0.010902	32544	0.230538	0.860636
SP_Pt_0_05	Volume	Right_Thalamus_Proper	0.0108489	0.0085687	32557	0.230538	0.922154
DYS_Pt_0_5	Thickness	lh_caudalanteriorcingulate	0.125692	0.00830701	32554	0.231001	1
DYS_Pt_0_5	Thickness	lh_superiorfrontal	0.124822	-0.00781671	32527	0.231001	1
WR_Pt_1e05	Thickness	lh_frontalpole	0.0266858	0.0121068	32525	0.231646	1
WR_Pt_1e05	Thickness	lh_superiortemporal	0.0272525	0.0115603	32549	0.231646	1
WR_Pt_1e05	Thickness	rh_superiortemporal	0.0236909	0.011708	32549	0.231646	1
DYS_Pt_5e08	Area	rh_parsorbitalis	0.0720507	-0.00772283	32545	0.233307	1
DYS_Pt_1	Thickness	rh_caudalmiddlefrontal	0.113824	-0.00834136	32529	0.234546	1
DYS_Pt_0_1	Thickness	lh_lingual	0.117274	-0.00844006	32555	0.234548	1
DYS_Pt_0_1	Thickness	rh_posteriorcingulate	0.114261	-0.00860386	32530	0.234548	1
DYS_Pt_e05	Area	rh_superiortemporal	0.0310472	-0.0082248	32540	0.234579	1
DYS_Pt_1	Thickness	rh_transversetemporal	0.117405	-0.00869351	32553	0.234811	1
DYS_Pt_1	Volume	lh_bankssts	0.0749154	-0.00869765	32491	0.235845	1
DYS_Pt_1	Volume	lh_medialorbitofrontal	0.0740677	-0.00763412	32547	0.235845	1
DYS_Pt_0_001	Thickness	rh_fusiform	0.0328048	-0.0114396	32532	0.236544	1
DYS_Pt_0_001	Thickness	rh_isthmuscingulate	0.0347858	-0.0114064	32536	0.236544	1
DYS_Pt_0_01	Thickness	lh_temporalpole	0.159451	-0.00771304	32527	0.238029	1
DYS_Pt_0_01	Thickness	rh_transversetemporal	0.16102	-0.00777193	32553	0.238029	1
PA_Pt_e05	Area	lh_entorhinal	0.0386836	0.0105764	32528	0.239135	1
PA_Pt_e05	Area	rh_entorhinal	0.0353222	0.0106593	32519	0.239135	1
WR_Pt_1e05	Volume	Left_Accumbens_area	0.00555467	-0.0120482	32557	0.23917	0.472147
WR_Pt_1e05	Volume	lh_inferiortemporal	0.00827662	0.0110583	32539	0.23917	0.703513
WR_Pt_1e05	Volume	Right_Pallidum	0.00844129	0.0107124	32557	0.23917	0.71751
DYS_Pt_0_1	Thickness	lh_cuneus	0.126893	-0.0083674	32557	0.239515	1
DYS_Pt_0_1	Thickness	lh_lateralorbitofrontal	0.131356	-0.0082983	32541	0.239515	1
DYS_Pt_0_1	Thickness	lh_middletemporal	0.133847	-0.00808658	32541	0.239515	1
DYS_Pt_0_1	Thickness	rh_caudalmiddlefrontal	0.132743	-0.00793035	32529	0.239515	1
DYS_Pt_0_01	Volume	rh_pericalcarine	0.092991	0.00861224	32532	0.239522	1
DYS_Pt_1	Volume	lh_inferiorparietal	0.0791015	-0.00782565	32544	0.240129	1
DYS_Pt_0_5	Volume	lh_medialorbitofrontal	0.0820879	-0.00743188	32547	0.240603	1
DYS_Pt_0_5	Volume	lh_transversetemporal	0.0811374	-0.00883277	32524	0.240603	1
DYS_Pt_0_05	Thickness	lh_lateralorbitofrontal	0.124157	-0.00845496	32541	0.241219	1
DYS_Pt_0_001	Area	lh_superiorparietal	0.0177684	0.0103903	32546	0.241651	1
DYS_Pt_0_001	Area	rh_superiorparietal	0.0158837	0.0102965	32542	0.241651	1
DYS_Pt_0_01	Thickness	rh_caudalmiddlefrontal	0.171033	-0.00721152	32529	0.242958	1
DYS_Pt_0_01	Thickness	rh_medialorbitofrontal	0.171499	-0.00750894	32542	0.242958	1
WR_Pt_1e05	Thickness	lh_superiorparietal	0.0393942	0.0109351	32535	0.243528	1
WR_Pt_1e05	Thickness	lh_transversetemporal	0.0381939	0.0114889	32552	0.243528	1
WR_Pt_1e05	Thickness	rh_lateraloccipital	0.0353366	0.0113475	32551	0.243528	1
DYS_Pt_1	Thickness	lh_cuneus	0.128989	-0.00832174	32557	0.243647	1
DYS_Pt_1	Thickness	rh_medialorbitofrontal	0.126476	-0.00840272	32542	0.243647	1
DYS_Pt_5e05	Area	lh_rostralanteriorcingulate	0.00718461	-0.0117529	32533	0.244277	0.488554
DYS_Pt_5e08	Area	lh_transversetemporal	0.079593	-0.00848816	32495	0.246015	1
PA_Pt_1	Volume	lh_middletemporal	0.00754509	0.0109937	32546	0.246641	0.641332
PA_Pt_1	Volume	rh_supramarginal	0.00832717	-0.0114537	32544	0.246641	0.707809
PA_Pt_1	Volume	rh_precentral	0.00870499	-0.0112515	32551	0.246641	0.739924
DYS_Pt_0_01	Thickness	rh_temporalpole	0.177887	-0.00740014	32526	0.246864	1
DYS_Pt_0_01	Volume	rh_parsorbitalis	0.0987741	-0.00764594	32539	0.246935	1
DYS_Pt_5e08	Volume	rh_parstriangularis	0.0351474	-0.0100096	32535	0.248961	1
WR_Pt_0_01	Volume	lh_postcentral	0.00983303	0.0112072	32541	0.250201	0.835807
WR_Pt_0_01	Volume	lh_rostralanteriorcingulate	0.0147177	0.0112394	32538	0.250201	1
WR_Pt_0_01	Volume	rh_cuneus	0.0140398	-0.0119487	32526	0.250201	1
WR_Pt_0_5	Volume	rh_medialorbitofrontal	0.00914998	0.0109775	32551	0.250783	0.777748
WR_Pt_0_5	Volume	Left_Thalamus_Proper	0.00942052	0.00893466	32557	0.250783	0.800744
WR_Pt_0_5	Volume	rh_frontalpole	0.0116658	0.0132277	32501	0.250783	0.991594
WR_Pt_0_5	Volume	lh_medialorbitofrontal	0.0175759	0.0101975	32547	0.250783	1
WR_Pt_0_5	Volume	rh_superiortemporal	0.0155385	0.00992707	32544	0.250783	1
WR_Pt_0_5	Volume	Right_VentralDC	0.0177023	0.00829249	32557	0.250783	1
DYS_Pt_1	Thickness	rh_isthmuscingulate	0.137322	-0.0080469	32536	0.252376	1
DYS_Pt_5e08	Thickness	lh_lateralorbitofrontal	0.0173951	0.0130476	32541	0.253402	1
DYS_Pt_5e08	Thickness	lh_rostralmiddlefrontal	0.0191893	0.0122099	32533	0.253402	1
DYS_Pt_5e08	Thickness	rh_medialorbitofrontal	0.022359	0.0125281	32542	0.253402	1
NREP_Pt_0_05	Thickness	lh_parsopercularis	0.00374573	0.0154157	32536	0.25471	0.25471
DYS_Pt_e05	Area	lh_medialorbitofrontal	0.0393306	-0.00816024	32549	0.254943	1
DYS_Pt_e05	Area	lh_superiorparietal	0.0412408	0.00895105	32546	0.254943	1
DYS_Pt_0_1	Thickness	rh_medialorbitofrontal	0.146254	-0.00798876	32542	0.255007	1
NREP_Pt_0_05	Thickness	lh_frontalpole	0.00750868	0.0146222	32525	0.255295	0.51059
SP_Pt_0_01	Area	rh_medialorbitofrontal	0.00938462	0.00969617	32555	0.255524	0.638154
SP_Pt_0_01	Area	lh_precentral	0.0131509	0.00958908	32548	0.255524	0.894258
SP_Pt_0_01	Area	lh_caudalmiddlefrontal	0.0150308	0.0109409	32527	0.255524	1
WR_Pt_1e05	Area	lh_fusiform	0.0228481	-0.00895784	32544	0.256954	1
WR_Pt_1e05	Area	rh_superiorfrontal	0.0264511	-0.00799962	32544	0.256954	1
DYS_Pt_0_1	Thickness	lh_superiorfrontal	0.151161	-0.00730954	32527	0.256973	1
DYS_Pt_5e08	Area	rh_pericalcarine	0.0873896	0.00869334	32545	0.258369	1
WR_Pt_0_01	Area	lh_rostralanteriorcingulate	0.00644765	0.0119302	32533	0.258946	0.43844
WR_Pt_0_01	Area	rh_pericalcarine	0.0125873	-0.0127188	32545	0.258946	0.855933
WR_Pt_0_01	Area	lh_bankssts	0.013844	0.0118804	32486	0.258946	0.941395
WR_Pt_0_01	Area	rh_parsorbitalis	0.0152321	0.0104425	32545	0.258946	1
DYS_Pt_0_01	Volume	Right_Pallidum	0.106628	-0.00656873	32557	0.258954	1
DYS_Pt_0_5	Volume	rh_parstriangularis	0.0914991	-0.00803942	32535	0.259248	1
DYS_Pt_1	Volume	rh_lateralorbitofrontal	0.0885139	-0.00688926	32544	0.259437	1
NREAD_Pt_1	Area	rh_paracentral	0.0190813	-0.0103502	32530	0.259506	1
DYS_Pt_5e08	Area	lh_parsorbitalis	0.0916226	-0.00725022	32545	0.259597	1
WR_Pt_1e05	Thickness	lh_postcentral	0.0459093	0.0106353	32550	0.260153	1
DYS_Pt_1	Volume	lh_lingual	0.0944332	0.00820704	32550	0.261808	1
DYS_Pt_1	Volume	rh_parstriangularis	0.0954829	-0.00794152	32535	0.261808	1
DYS_Pt_0_5	Thickness	lh_middletemporal	0.15464	-0.00767884	32541	0.263443	1
DYS_Pt_0_5	Thickness	rh_isthmuscingulate	0.154966	-0.00770308	32536	0.263443	1
DYS_Pt_0_5	Thickness	rh_rostralmiddlefrontal	0.149151	-0.00763312	32532	0.263443	1
DYS_Pt_1	Thickness	lh_caudalanteriorcingulate	0.151202	0.0077854	32554	0.263634	1
DYS_Pt_1	Thickness	rh_rostralmiddlefrontal	0.148046	-0.00765316	32532	0.263634	1
SP_Pt_1e05	Area	lh_parstriangularis	0.00389161	-0.0136447	32536	0.264629	0.264629
DYS_Pt_0_05	Volume	lh_pericalcarine	0.0779163	0.00909557	32531	0.264915	1
WR_Pt_0_5	Volume	Left_VentralDC	0.0218534	0.00799768	32557	0.265362	1
DYS_Pt_0_1	Volume	lh_superiorfrontal	0.0655704	-0.00683172	32557	0.265404	1
DYS_Pt_0_1	Volume	lh_supramarginal	0.0724322	-0.00773013	32540	0.268748	1
DYS_Pt_0_1	Volume	Right_Pallidum	0.07272	-0.00731532	32557	0.268748	1
PA_Pt_5e05	Area	lh_insula	0.0189965	-0.00954616	32541	0.271271	1
PA_Pt_5e05	Area	lh_pericalcarine	0.0292166	0.0112202	32544	0.271271	1
PA_Pt_5e05	Area	lh_rostralmiddlefrontal	0.023164	0.00837469	32547	0.271271	1
PA_Pt_5e05	Area	rh_cuneus	0.0260024	0.0102943	32539	0.271271	1
PA_Pt_5e05	Area	rh_parsopercularis	0.0319142	-0.0102423	32498	0.271271	1
WR_Pt_0_01	Volume	Left_Hippocampus	0.0255614	0.00911019	32557	0.27159	1
WR_Pt_0_01	Volume	rh_pericalcarine	0.0230161	-0.0116664	32532	0.27159	1
WR_Pt_0_01	Volume	rh_rostralmiddlefrontal	0.019381	-0.00896556	32543	0.27159	1
DYS_Pt_0_1	Area	lh_pericalcarine	0.00594363	0.014187	32544	0.272099	0.404167
DYS_Pt_0_1	Area	lh_cuneus	0.0400145	0.00990918	32533	0.272099	1
DYS_Pt_0_1	Area	lh_frontalpole	0.0399019	0.00966023	32542	0.272099	1
DYS_Pt_0_1	Area	lh_lingual	0.030437	0.0102585	32553	0.272099	1
DYS_Pt_0_1	Area	lh_superiorparietal	0.030411	0.0095093	32546	0.272099	1
DYS_Pt_0_1	Area	rh_cuneus	0.0217963	0.0106317	32539	0.272099	1
DYS_Pt_0_1	Area	rh_isthmuscingulate	0.0216914	0.0099401	32527	0.272099	1
DYS_Pt_0_1	Area	rh_pericalcarine	0.0155232	0.012338	32545	0.272099	1
DYS_Pt_0_1	Area	rh_superiorparietal	0.0327048	0.00913857	32542	0.272099	1
DYS_Pt_0_1	Area	rh_transversetemporal	0.024908	-0.0105325	32513	0.272099	1
DYS_Pt_0_001	Area	rh_transversetemporal	0.0240234	-0.010575	32513	0.272265	1
DYS_Pt_1	Thickness	lh_inferiortemporal	0.165252	-0.00758916	32546	0.273191	1
DYS_Pt_1	Thickness	lh_middletemporal	0.168083	-0.00743563	32541	0.273191	1
DYS_Pt_1	Thickness	rh_posteriorcingulate	0.168736	-0.007498	32530	0.273191	1
WR_Pt_1	Volume	Left_Thalamus_Proper	0.00374427	0.00997942	32557	0.273755	0.318263
WR_Pt_1	Volume	Right_VentralDC	0.00644129	0.00952894	32557	0.273755	0.54751
DYS_Pt_0_01	Thickness	lh_inferiortemporal	0.205146	-0.00692038	32546	0.276026	1
DYS_Pt_0_01	Thickness	rh_rostralmiddlefrontal	0.207019	-0.00666716	32532	0.276026	1
DYS_Pt_1	Area	lh_inferiortemporal	0.0487873	0.00803079	32541	0.276461	1
DYS_Pt_0_1	Volume	rh_lateralorbitofrontal	0.0781262	-0.0071252	32544	0.276697	1
DYS_Pt_0_05	Volume	lh_inferiorparietal	0.0855466	-0.00766106	32544	0.277294	1
DYS_Pt_0_05	Volume	lh_paracentral	0.0880817	-0.00804938	32530	0.277294	1
DYS_Pt_0_1	Volume	lh_inferiorparietal	0.0839496	-0.00770196	32544	0.278194	1
DYS_Pt_0_1	Volume	rh_frontalpole	0.0877304	-0.00891186	32501	0.278194	1
DYS_Pt_0_1	Volume	rh_insula	0.092357	-0.0068638	32550	0.278194	1
DYS_Pt_0_1	Volume	rh_paracentral	0.0898292	-0.00801928	32526	0.278194	1
DYS_Pt_0_1	Volume	rh_parahippocampal	0.0949134	-0.00875786	32518	0.278194	1
DYS_Pt_0_5	Volume	lh_lingual	0.101703	0.00803213	32550	0.278864	1
NREAD_Pt_0_5	Area	lh_parstriangularis	0.0108004	-0.0120889	32536	0.280036	0.734427
NREAD_Pt_0_5	Area	lh_inferiorparietal	0.0164727	0.010566	32535	0.280036	1
NREAD_Pt_0_5	Area	rh_paracentral	0.0153626	-0.010702	32530	0.280036	1
PA_Pt_0_001	Area	lh_postcentral	0.00845261	0.0101696	32535	0.282508	0.574777
PA_Pt_0_001	Area	rh_temporalpole	0.0107553	0.0120254	32539	0.282508	0.73136
PA_Pt_0_001	Area	rh_middletemporal	0.0124636	0.00935429	32540	0.282508	0.847523
DYS_Pt_1	Area	rh_isthmuscingulate	0.0540183	0.0083427	32527	0.282557	1
PA_Pt_0_001	Volume	Right_Hippocampus	0.0108768	-0.0104117	32557	0.284457	0.924527
PA_Pt_0_001	Volume	Left_VentralDC	0.0167328	-0.00828189	32557	0.284457	1
PA_Pt_0_001	Volume	rh_middletemporal	0.0149252	0.00962618	32550	0.284457	1
DYS_Pt_0_1	Thickness	rh_temporalpole	0.171578	-0.00751916	32526	0.284568	1
PA_Pt_e05	Area	lh_inferiortemporal	0.0502508	0.00795727	32541	0.284754	1
DYS_Pt_e05	Area	lh_parsorbitalis	0.0703106	-0.00778497	32545	0.284968	1
DYS_Pt_e05	Area	lh_pericalcarine	0.0708223	0.00930153	32544	0.284968	1
DYS_Pt_e05	Area	rh_cuneus	0.0712421	0.00834666	32539	0.284968	1
DYS_Pt_e05	Area	rh_fusiform	0.0628594	-0.00727227	32548	0.284968	1
DYS_Pt_e05	Area	rh_lateralorbitofrontal	0.0592136	-0.00766704	32550	0.284968	1
DYS_Pt_e05	Area	rh_parahippocampal	0.0609917	-0.00868398	32520	0.284968	1
DYS_Pt_0_01	Volume	Brain_Stem	0.120751	-0.00564344	32557	0.285106	1
DYS_Pt_0_01	Volume	rh_superiorfrontal	0.124231	-0.00572837	32542	0.285395	1
PA_Pt_e05	Area	lh_cuneus	0.0679984	0.00878242	32533	0.287394	1
PA_Pt_e05	Area	lh_rostralmiddlefrontal	0.0573902	0.00700551	32547	0.287394	1
PA_Pt_e05	Area	rh_fusiform	0.0668643	-0.00715689	32548	0.287394	1
PA_Pt_e05	Area	rh_parstriangularis	0.0611641	0.00883065	32525	0.287394	1
PA_Pt_e05	Area	rh_precuneus	0.0718485	0.00697836	32533	0.287394	1
DYS_Pt_5e08	Area	lh_precentral	0.105749	0.00625552	32548	0.287637	1
WR_Pt_1	Volume	lh_medialorbitofrontal	0.0101769	0.0110405	32547	0.288346	0.865038
DYS_Pt_0_1	Volume	lh_inferiortemporal	0.117297	0.00657415	32539	0.288728	1
DYS_Pt_0_1	Volume	lh_lateraloccipital	0.109845	-0.00682603	32538	0.288728	1
DYS_Pt_0_1	Volume	lh_paracentral	0.118888	-0.00736108	32530	0.288728	1
DYS_Pt_0_1	Volume	lh_posteriorcingulate	0.117346	-0.00745894	32534	0.288728	1
DYS_Pt_0_1	Volume	rh_fusiform	0.107832	-0.00671471	32548	0.288728	1
DYS_Pt_0_1	Volume	rh_pericalcarine	0.114796	0.00809573	32532	0.288728	1
DYS_Pt_0_01	Volume	lh_pericalcarine	0.129268	0.00781816	32531	0.289152	1
WR_Pt_1	Volume	rh_medialorbitofrontal	0.0136607	0.0103905	32551	0.290289	1
WR_Pt_0_05	Volume	rh_medialorbitofrontal	0.0102501	0.0107767	32551	0.290418	0.871254
WR_Pt_1e05	Area	lh_superiorfrontal	0.0518156	-0.00696159	32546	0.2908	1
WR_Pt_1e05	Area	rh_caudalanteriorcingulate	0.0621638	0.00939028	32494	0.2908	1
WR_Pt_1e05	Area	rh_lateralorbitofrontal	0.0635742	-0.00753523	32550	0.2908	1
WR_Pt_1e05	Area	rh_medialorbitofrontal	0.0376831	-0.00775945	32555	0.2908	1
WR_Pt_1e05	Area	rh_parahippocampal	0.0641472	0.00857586	32520	0.2908	1
WR_Pt_1e05	Area	rh_parsopercularis	0.0612504	-0.0089359	32498	0.2908	1
WR_Pt_1e05	Area	rh_parstriangularis	0.0540958	-0.00908914	32525	0.2908	1
WR_Pt_1e05	Area	rh_rostralanteriorcingulate	0.0463486	0.00938011	32552	0.2908	1
DYS_Pt_0_05	Thickness	lh_entorhinal	0.158974	-0.00772179	32468	0.292168	1
DYS_Pt_0_05	Thickness	lh_superiorfrontal	0.154851	-0.00724286	32527	0.292168	1
DYS_Pt_0_001	Volume	lh_superiortemporal	0.0688285	-0.0074872	32546	0.292521	1
WR_Pt_0_5	Volume	lh_insula	0.0275833	0.00920285	32549	0.293072	1
WR_Pt_1e05	Thickness	lh_bankssts	0.0651165	0.0100643	32545	0.295195	1
WR_Pt_1e05	Thickness	lh_fusiform	0.0644365	0.00997261	32532	0.295195	1
WR_Pt_1e05	Thickness	rh_transversetemporal	0.0617993	0.0103467	32553	0.295195	1
WR_Pt_0_05	Area	rh_insula	0.0136186	0.0101589	32554	0.296398	0.926065
WR_Pt_0_05	Area	lh_supramarginal	0.0201916	-0.00989036	32533	0.296398	1
WR_Pt_0_05	Area	rh_lateralorbitofrontal	0.0278512	0.00896691	32550	0.296398	1
WR_Pt_0_05	Area	rh_medialorbitofrontal	0.0235565	0.00848569	32555	0.296398	1
WR_Pt_0_05	Area	rh_pericalcarine	0.0283095	-0.0111979	32545	0.296398	1
WR_Pt_0_05	Area	rh_superiortemporal	0.0305115	0.00827802	32540	0.296398	1
DYS_Pt_0_001	Volume	rh_parsopercularis	0.073506	-0.00855989	32515	0.297524	1
WR_Pt_0_05	Thickness	lh_postcentral	0.00956282	0.0138572	32550	0.298146	0.650272
WR_Pt_0_05	Thickness	rh_caudalanteriorcingulate	0.0118733	-0.0137369	32535	0.298146	0.807385
WR_Pt_0_05	Thickness	rh_postcentral	0.0131535	0.0132743	32553	0.298146	0.894438
NREAD_Pt_0_05	Volume	rh_transversetemporal	0.0177239	0.0119367	32523	0.301306	1
PA_Pt_0_001	Thickness	lh_pericalcarine	0.0132957	-0.0134776	32551	0.301369	0.904107
SP_Pt_1e05	Area	lh_parsopercularis	0.0110123	-0.0123042	32479	0.301773	0.748839
SP_Pt_1e05	Area	rh_rostralanteriorcingulate	0.0133135	-0.011648	32552	0.301773	0.905318
DYS_Pt_5e08	Thickness	lh_rostralanteriorcingulate	0.0310807	0.0115855	32548	0.301927	1
DYS_Pt_1	Thickness	lh_lingual	0.191524	-0.00703802	32555	0.302874	1
WR_Pt_0_05	Area	rh_parsorbitalis	0.0357395	0.00905166	32545	0.303786	1
SP_Pt_0_05	Volume	rh_parsopercularis	0.0179834	0.0113178	32515	0.305718	1
DYS_Pt_0_05	Area	lh_pericalcarine	0.00899905	0.0134687	32544	0.305968	0.611935
DYS_Pt_0_05	Area	lh_lingual	0.0303562	0.0102615	32553	0.306003	1
DYS_Pt_0_05	Area	lh_superiorparietal	0.0276343	0.00967324	32546	0.306003	1
DYS_Pt_0_05	Area	rh_entorhinal	0.0315004	0.0109203	32519	0.306003	1
DYS_Pt_0_05	Area	rh_pericalcarine	0.0259581	0.0113513	32545	0.306003	1
DYS_Pt_0_05	Area	rh_superiorparietal	0.0226447	0.0097515	32542	0.306003	1
DYS_Pt_5e05	Area	lh_lingual	0.0200333	0.0110021	32553	0.306706	1
DYS_Pt_5e05	Area	lh_medialorbitofrontal	0.058635	-0.00748644	32549	0.306706	1
DYS_Pt_5e05	Area	lh_pericalcarine	0.0366641	0.0107556	32544	0.306706	1
DYS_Pt_5e05	Area	lh_superiorfrontal	0.0501045	-0.00701528	32546	0.306706	1
DYS_Pt_5e05	Area	rh_fusiform	0.0429542	-0.00791167	32548	0.306706	1
DYS_Pt_5e05	Area	rh_insula	0.0559313	-0.0078442	32554	0.306706	1
DYS_Pt_5e05	Area	rh_lateralorbitofrontal	0.0355262	-0.0085419	32550	0.306706	1
DYS_Pt_5e05	Area	rh_medialorbitofrontal	0.048008	-0.00738474	32555	0.306706	1
DYS_Pt_5e05	Area	rh_parahippocampal	0.0574158	-0.00880527	32520	0.306706	1
DYS_Pt_5e05	Area	rh_parstriangularis	0.0365107	-0.00987153	32525	0.306706	1
DYS_Pt_5e05	Area	rh_superiorparietal	0.0530567	0.00826161	32542	0.306706	1
NREP_Pt_5e05	Area	lh_superiorparietal	0.037222	0.00913378	32546	0.308406	1
NREP_Pt_5e05	Area	rh_precentral	0.0408185	0.007986	32539	0.308406	1
DYS_Pt_5e05	Volume	lh_entorhinal	0.03266	-0.0111573	32472	0.308456	1
DYS_Pt_5e05	Volume	lh_rostralanteriorcingulate	0.0215099	-0.0105747	32538	0.308456	1
DYS_Pt_5e05	Volume	lh_superiorparietal	0.0310738	0.0094391	32548	0.308456	1
DYS_Pt_5e05	Volume	rh_insula	0.0312109	-0.00876882	32550	0.308456	1
DYS_Pt_5e05	Volume	rh_parahippocampal	0.0251274	-0.0117215	32518	0.308456	1
SP_Pt_0_05	Area	rh_middletemporal	0.0683769	0.00682775	32540	0.309975	1
WR_Pt_1e05	Area	lh_isthmuscingulate	0.0742998	-0.00755292	32523	0.313248	1
WR_Pt_1e05	Area	lh_parstriangularis	0.0832488	-0.00819178	32536	0.313248	1
WR_Pt_1e05	Area	rh_precuneus	0.0895294	-0.00658566	32533	0.313248	1
WR_Pt_1e05	Area	rh_superiorparietal	0.0921316	-0.00719091	32542	0.313248	1
WR_Pt_1e05	Area	rh_transversetemporal	0.0862657	-0.00803816	32513	0.313248	1
WR_Pt_0_1	Volume	lh_insula	0.00774913	0.0111054	32549	0.313451	0.658676
WR_Pt_0_1	Volume	rh_medialorbitofrontal	0.0115715	0.0106179	32551	0.313451	0.983577
WR_Pt_0_1	Volume	lh_postcentral	0.0147507	0.0106231	32541	0.313451	1
WR_Pt_0_1	Volume	rh_superiortemporal	0.0130946	0.0101639	32544	0.313451	1
WR_Pt_1e05	Area	lh_postcentral	0.11574	-0.00607727	32535	0.314812	1
WR_Pt_1e05	Area	rh_insula	0.110786	0.00654178	32554	0.314812	1
WR_Pt_1e05	Area	rh_parsorbitalis	0.113294	-0.00680059	32545	0.314812	1
WR_Pt_1e05	Area	rh_rostralmiddlefrontal	0.101915	-0.00613713	32542	0.314812	1
WR_Pt_1e05	Area	rh_supramarginal	0.112865	-0.00674022	32542	0.314812	1
WR_Pt_0_1	Volume	rh_lateralorbitofrontal	0.0195859	0.00947201	32544	0.315069	1
WR_Pt_0_1	Volume	rh_transversetemporal	0.0222401	0.0115601	32523	0.315069	1
DYS_Pt_0_1	Area	lh_inferiortemporal	0.050973	0.00795437	32541	0.315106	1
WR_Pt_1e05	Area	lh_frontalpole	0.125315	-0.00719057	32542	0.315609	1
WR_Pt_1e05	Area	lh_transversetemporal	0.124241	-0.00744496	32495	0.315609	1
DYS_Pt_0_5	Thickness	lh_inferiortemporal	0.199709	-0.00701431	32546	0.315819	1
DYS_Pt_0_5	Thickness	lh_lingual	0.192422	-0.00702453	32555	0.315819	1
DYS_Pt_0_5	Thickness	rh_posteriorcingulate	0.199646	-0.00698813	32530	0.315819	1
DYS_Pt_0_01	Area	rh_isthmuscingulate	0.0232856	0.00981015	32527	0.316684	1
NREP_Pt_5e05	Area	rh_insula	0.0466455	0.00816355	32554	0.317189	1
DYS_Pt_0_01	Thickness	lh_superiorparietal	0.245489	-0.00617057	32535	0.320322	1
DYS_Pt_0_01	Thickness	rh_lingual	0.249663	-0.00624838	32554	0.320322	1
DYS_Pt_0_01	Area	lh_superiorparietal	0.0330359	0.00935193	32546	0.32092	1
DYS_Pt_0_01	Area	rh_cuneus	0.0323931	0.00990333	32539	0.32092	1
DYS_Pt_0_5	Thickness	lh_bankssts	0.212469	-0.00681933	32545	0.321065	1
DYS_Pt_0_5	Thickness	rh_pericalcarine	0.20811	-0.00689986	32554	0.321065	1
WR_Pt_0_5	Volume	lh_rostralanteriorcingulate	0.0342603	0.00980461	32538	0.32357	1
WR_Pt_0_01	Thickness	rh_transversetemporal	0.00827637	0.014657	32553	0.323622	0.562793
WR_Pt_0_01	Thickness	rh_caudalanteriorcingulate	0.00951829	-0.0141322	32535	0.323622	0.647244
WR_Pt_1e05	Area	lh_parahippocampal	0.13329	0.00700407	32517	0.323704	1
DYS_Pt_0_05	Volume	lh_medialorbitofrontal	0.111375	-0.00680292	32547	0.324332	1
DYS_Pt_0_05	Volume	rh_superiorfrontal	0.11447	-0.00588822	32542	0.324332	1
DYS_Pt_0_05	Volume	Right_Pallidum	0.112444	-0.00646916	32557	0.324332	1
WR_Pt_1	Volume	Left_VentralDC	0.0192228	0.00816916	32557	0.326787	1
PA_Pt_0_5	Area	lh_middletemporal	0.00480598	0.0110075	32547	0.326807	0.326807
DYS_Pt_0_001	Thickness	lh_postcentral	0.0580062	-0.0101	32550	0.328702	1
DYS_Pt_0_001	Thickness	rh_postcentral	0.0539075	-0.0102812	32553	0.328702	1
DYS_Pt_0_01	Volume	lh_caudalanteriorcingulate	0.151087	-0.00767478	32537	0.329292	1
DYS_Pt_0_5	Thickness	rh_superiorparietal	0.223809	-0.00643857	32541	0.330848	1
DYS_Pt_0_5	Volume	lh_postcentral	0.125796	-0.00664824	32541	0.334147	1
PA_Pt_e05	Area	lh_posteriorcingulate	0.0885398	0.00767481	32521	0.334483	1
DYS_Pt_5e05	Volume	Left_Accumbens_area	0.0403929	0.00890871	32557	0.335545	1
DYS_Pt_5e05	Volume	rh_posteriorcingulate	0.0434234	-0.00949391	32538	0.335545	1
WR_Pt_1e05	Area	lh_inferiortemporal	0.14411	0.00593977	32541	0.337912	1
DYS_Pt_0_5	Volume	lh_inferiortemporal	0.133335	0.00630146	32539	0.339271	1
DYS_Pt_0_5	Volume	lh_rostralmiddlefrontal	0.135708	0.00558141	32545	0.339271	1
DYS_Pt_0_01	Thickness	rh_rostralanteriorcingulate	0.269518	-0.00603982	32546	0.339394	1
DYS_Pt_1	Thickness	lh_bankssts	0.2302	-0.00656182	32545	0.340295	1
DYS_Pt_1	Thickness	rh_pericalcarine	0.227279	-0.00661756	32554	0.340295	1
DYS_Pt_1	Thickness	rh_superiorparietal	0.225278	-0.00641754	32541	0.340295	1
DYS_Pt_0_05	Thickness	rh_transversetemporal	0.191009	-0.00725856	32553	0.341805	1
NREAD_Pt_e05	Volume	Left_Thalamus_Proper	0.00403672	0.00981591	32557	0.343121	0.343121
WR_Pt_1	Volume	rh_frontalpole	0.0317123	0.0112702	32501	0.343238	1
WR_Pt_1	Volume	rh_superiortemporal	0.0323047	0.008786	32544	0.343238	1
WR_Pt_1	Volume	Right_Thalamus_Proper	0.0269457	0.0074956	32557	0.343238	1
DYS_Pt_1	Thickness	lh_temporalpole	0.238756	-0.00646729	32527	0.345434	1
DYS_Pt_5e05	Area	lh_bankssts	0.108236	-0.00774008	32486	0.346036	1
DYS_Pt_5e05	Area	lh_entorhinal	0.118532	-0.00799173	32528	0.346036	1
DYS_Pt_5e05	Area	lh_fusiform	0.0958597	-0.00655655	32544	0.346036	1
DYS_Pt_5e05	Area	lh_parahippocampal	0.094689	-0.0077992	32517	0.346036	1
DYS_Pt_5e05	Area	lh_parsorbitalis	0.0760884	-0.00762842	32545	0.346036	1
DYS_Pt_5e05	Area	lh_temporalpole	0.122131	-0.00719536	32545	0.346036	1
DYS_Pt_5e05	Area	lh_transversetemporal	0.0832161	-0.00839253	32495	0.346036	1
DYS_Pt_5e05	Area	rh_isthmuscingulate	0.109095	0.00692453	32527	0.346036	1
DYS_Pt_5e05	Area	rh_parsorbitalis	0.103988	-0.00698427	32545	0.346036	1
DYS_Pt_5e05	Area	rh_superiortemporal	0.113763	-0.0060308	32540	0.346036	1
DYS_Pt_5e05	Area	rh_temporalpole	0.0897736	-0.00800564	32539	0.346036	1
DYS_Pt_0_01	Area	lh_cuneus	0.0409543	0.00984995	32533	0.348112	1
DYS_Pt_0_5	Volume	rh_caudalanteriorcingulate	0.143433	-0.00781123	32523	0.348337	1
DYS_Pt_0_001	Thickness	rh_posteriorcingulate	0.06665	-0.0099699	32530	0.348631	1
WR_Pt_0_01	Volume	lh_bankssts	0.0410163	0.00997639	32491	0.348639	1
WR_Pt_0_01	Volume	rh_postcentral	0.038728	0.00914622	32537	0.348639	1
DYS_Pt_e05	Area	lh_rostralmiddlefrontal	0.11026	-0.00589355	32547	0.349951	1
DYS_Pt_e05	Area	lh_superiortemporal	0.113136	-0.00608026	32544	0.349951	1
DYS_Pt_e05	Area	rh_caudalanteriorcingulate	0.109632	-0.00805887	32494	0.349951	1
DYS_Pt_e05	Area	rh_caudalmiddlefrontal	0.105605	0.00737518	32530	0.349951	1
DYS_Pt_e05	Area	rh_isthmuscingulate	0.113219	0.00684648	32527	0.349951	1
NREP_Pt_0_5	Volume	lh_superiorfrontal	0.0165274	0.00889646	32557	0.351207	1
NREP_Pt_0_5	Volume	rh_medialorbitofrontal	0.0129907	0.010415	32551	0.351207	1
NREP_Pt_0_5	Volume	rh_superiortemporal	0.0139973	0.0100363	32544	0.351207	1
NREP_Pt_0_5	Volume	rh_transversetemporal	0.0117665	0.0126997	32523	0.351207	1
DYS_Pt_1	Area	rh_caudalmiddlefrontal	0.0723839	0.00820254	32530	0.351579	1
DYS_Pt_0_05	Volume	Right_Thalamus_Proper	0.128234	-0.00512579	32557	0.35161	1
DYS_Pt_0_001	Area	lh_frontalpole	0.041367	0.00956926	32542	0.351619	1
DYS_Pt_0_001	Area	lh_pericalcarine	0.0364422	0.0107655	32544	0.351619	1
DYS_Pt_0_01	Area	lh_bankssts	0.0466592	-0.00959243	32486	0.352536	1
NREP_Pt_5e05	Area	lh_entorhinal	0.0661384	0.00940677	32528	0.352757	1
NREP_Pt_5e05	Area	rh_medialorbitofrontal	0.0706266	0.00675162	32555	0.352757	1
NREP_Pt_5e05	Area	rh_parahippocampal	0.0726264	0.00831862	32520	0.352757	1
NREP_Pt_5e05	Area	rh_superiortemporal	0.0589523	0.00720118	32540	0.352757	1
WR_Pt_1e05	Area	lh_temporalpole	0.156456	-0.00659371	32545	0.354633	1
DYS_Pt_0_01	Volume	rh_parstriangularis	0.167866	-0.00656049	32535	0.356716	1
PA_Pt_0_001	Volume	lh_frontalpole	0.0294139	0.0112198	32523	0.357169	1
PA_Pt_0_001	Volume	Right_Putamen	0.0272498	-0.00937392	32557	0.357169	1
WR_Pt_0_01	Volume	Right_VentralDC	0.0464033	0.00692825	32557	0.358571	1
DYS_Pt_1	Thickness	lh_superiorparietal	0.253913	-0.00606975	32535	0.35971	1
DYS_Pt_1	Thickness	rh_temporalpole	0.259267	-0.0062047	32526	0.3598	1
DYS_Pt_0_5	Area	lh_precuneus	0.0900872	0.00675716	32538	0.360349	1
DYS_Pt_0_5	Area	lh_superiortemporal	0.0788628	-0.00675696	32544	0.360349	1
DYS_Pt_0_5	Area	rh_caudalmiddlefrontal	0.0895342	0.00775211	32530	0.360349	1
DYS_Pt_0_5	Area	rh_parsopercularis	0.0820484	0.00832176	32498	0.360349	1
PA_Pt_0_001	Volume	Left_Caudate	0.0382266	-0.00977838	32557	0.361029	1
PA_Pt_0_001	Volume	Right_Caudate	0.0340289	-0.00982786	32557	0.361029	1
SP_Pt_0_05	Volume	lh_inferiorparietal	0.0341254	0.00942251	32544	0.362582	1
SP_Pt_0_05	Volume	lh_supramarginal	0.0277287	-0.0094525	32540	0.362582	1
SP_Pt_0_05	Volume	rh_parstriangularis	0.0324604	0.0101665	32535	0.362582	1
PA_Pt_1	Volume	lh_supramarginal	0.0170841	-0.0102408	32540	0.363037	1
SP_Pt_0_01	Volume	Right_VentralDC	0.00427523	0.00991589	32557	0.363395	0.363395
DYS_Pt_0_05	Thickness	rh_rostralmiddlefrontal	0.2085	-0.00665302	32532	0.363538	1
WR_Pt_0_1	Area	rh_parsorbitalis	0.0161602	0.0103867	32545	0.366298	1
DYS_Pt_1	Area	lh_superiortemporal	0.0828563	-0.00666794	32544	0.366952	1
DYS_Pt_1	Area	rh_parsopercularis	0.0863416	0.00820655	32498	0.366952	1
WR_Pt_1e05	Area	lh_bankssts	0.173989	0.00654899	32486	0.369728	1
WR_Pt_1e05	Area	rh_cuneus	0.170352	-0.00634067	32539	0.369728	1
DYS_Pt_1	Volume	lh_postcentral	0.140066	-0.00640726	32541	0.370355	1
DYS_Pt_1	Volume	lh_temporalpole	0.143785	-0.00765699	32538	0.370355	1
DYS_Pt_0_001	Volume	rh_lateraloccipital	0.0962554	-0.00702254	32548	0.371896	1
DYS_Pt_5e08	Area	rh_lateraloccipital	0.142259	0.00622936	32551	0.372061	1
DYS_Pt_1	Volume	Right_Thalamus_Proper	0.149128	-0.00486239	32557	0.372819	1
WR_Pt_0_1	Thickness	rh_postcentral	0.00714485	0.0144265	32553	0.373175	0.48585
WR_Pt_0_1	Thickness	lh_postcentral	0.0109757	0.0136261	32550	0.373175	0.746351
NREAD_Pt_1	Area	lh_frontalpole	0.0329837	-0.0100311	32542	0.373816	1
DYS_Pt_0_5	Thickness	rh_temporalpole	0.259473	-0.00620265	32526	0.375408	1
DYS_Pt_0_1	Volume	lh_parsorbitalis	0.17689	0.0063151	32540	0.375892	1
DYS_Pt_0_1	Volume	lh_rostralanteriorcingulate	0.160552	-0.00646702	32538	0.375892	1
DYS_Pt_0_1	Volume	lh_rostralmiddlefrontal	0.171734	0.005112	32545	0.375892	1
DYS_Pt_0_1	Volume	rh_middletemporal	0.164224	-0.00551607	32550	0.375892	1
DYS_Pt_0_1	Volume	rh_superiorfrontal	0.175554	-0.00505421	32542	0.375892	1
DYS_Pt_5e08	Area	lh_cuneus	0.155916	0.00682994	32533	0.375912	1
DYS_Pt_5e08	Area	lh_fusiform	0.165843	-0.00545261	32544	0.375912	1
DYS_Pt_5e08	Area	lh_pericalcarine	0.15364	0.00734027	32544	0.375912	1
DYS_Pt_5e08	Area	lh_superiortemporal	0.164199	-0.00533478	32544	0.375912	1
DYS_Pt_0_1	Thickness	rh_bankssts	0.232584	-0.00650014	32551	0.376564	1
DYS_Pt_0_05	Volume	rh_cuneus	0.141812	-0.007147	32526	0.376687	1
WR_Pt_0_01	Volume	lh_cuneus	0.0562026	-0.00946309	32517	0.376894	1
WR_Pt_0_01	Volume	rh_parsorbitalis	0.0576427	0.00880201	32539	0.376894	1
DYS_Pt_5e05	Area	lh_frontalpole	0.138837	0.00694551	32542	0.377636	1
NREAD_Pt_1	Thickness	lh_cuneus	0.022297	-0.0125345	32557	0.379048	1
NREAD_Pt_1	Thickness	rh_parstriangularis	0.0182549	-0.0125669	32535	0.379048	1
NREAD_Pt_1	Thickness	rh_supramarginal	0.0163908	-0.0126497	32524	0.379048	1
PA_Pt_5e05	Volume	lh_insula	0.0057431	-0.0114552	32549	0.379759	0.488163
PA_Pt_5e05	Volume	rh_parsopercularis	0.00893552	-0.0125032	32515	0.379759	0.759519
WR_Pt_0_5	Volume	Right_Thalamus_Proper	0.0447063	0.00679883	32557	0.380004	1
NREP_Pt_5e05	Area	rh_parsorbitalis	0.0839706	0.00742326	32545	0.380667	1
PA_Pt_5e05	Area	rh_lingual	0.050719	0.00919898	32551	0.383211	1
DYS_Pt_0_5	Area	lh_parstriangularis	0.101664	-0.00775926	32536	0.384063	1
WR_Pt_1e05	Thickness	lh_caudalmiddlefrontal	0.0963593	0.00874201	32528	0.385437	1
WR_Pt_1e05	Thickness	rh_parsorbitalis	0.0926298	0.009062	32536	0.385437	1
SP_Pt_0_05	Area	lh_supramarginal	0.0906911	-0.00717813	32533	0.385437	1
DYS_Pt_0_1	Thickness	rh_transversetemporal	0.243996	-0.00646857	32553	0.385855	1
WR_Pt_0_5	Volume	lh_bankssts	0.0587672	0.00927441	32491	0.386695	1
WR_Pt_0_5	Volume	lh_inferiorparietal	0.0557004	0.00856869	32544	0.386695	1
WR_Pt_0_5	Volume	lh_postcentral	0.0591417	0.00823421	32541	0.386695	1
DYS_Pt_0_1	Thickness	lh_medialorbitofrontal	0.250415	-0.00630443	32539	0.387005	1
SP_Pt_0_1	Area	lh_caudalmiddlefrontal	0.00717092	0.0121156	32527	0.38735	0.487623
SP_Pt_0_1	Area	lh_lingual	0.0116622	-0.0119422	32553	0.38735	0.793033
SP_Pt_0_1	Area	rh_lingual	0.017089	-0.011242	32551	0.38735	1
DYS_Pt_0_01	Volume	lh_supramarginal	0.187005	-0.00567062	32540	0.387692	1
PA_Pt_1	Volume	rh_parstriangularis	0.0228372	-0.0108193	32535	0.388233	1
DYS_Pt_e05	Area	rh_pericalcarine	0.131724	0.00767212	32545	0.389444	1
NREP_Pt_e05	Area	rh_superiorfrontal	0.011242	0.00917696	32544	0.389533	0.764455
NREP_Pt_e05	Area	rh_caudalmiddlefrontal	0.0114568	0.0115674	32530	0.389533	0.779065
DYS_Pt_0_1	Volume	Left_Putamen	0.190918	0.00552172	32557	0.392174	1
DYS_Pt_0_1	Volume	Right_Putamen	0.19378	0.00553224	32557	0.392174	1
DYS_Pt_1	Volume	rh_caudalanteriorcingulate	0.161497	-0.00747377	32523	0.392207	1
DYS_Pt_0_5	Volume	lh_rostralanteriorcingulate	0.166568	-0.00637616	32538	0.393287	1
DYS_Pt_e05	Volume	lh_rostralanteriorcingulate	0.0346258	-0.00972027	32538	0.394404	1
DYS_Pt_e05	Volume	lh_superiorfrontal	0.0371204	-0.00772033	32557	0.394404	1
NREP_Pt_0_001	Volume	Brain_Stem	0.023317	0.00823693	32557	0.396388	1
NREP_Pt_0_001	Volume	lh_lateralorbitofrontal	0.0218261	0.00900583	32553	0.396388	1
NREP_Pt_0_001	Volume	Right_Caudate	0.0204643	0.0107446	32557	0.396388	1
NREP_Pt_5e05	Area	lh_parahippocampal	0.0933191	0.00783128	32517	0.396606	1
NREP_Pt_e05	Area	lh_rostralmiddlefrontal	0.0235323	0.00838954	32547	0.400049	1
NREP_Pt_e05	Area	rh_lateralorbitofrontal	0.019976	0.00949215	32550	0.400049	1
DYS_Pt_e05	Area	rh_lingual	0.154482	0.00670767	32551	0.40124	1
DYS_Pt_e05	Area	rh_parsorbitalis	0.157813	-0.00606896	32545	0.40124	1
DYS_Pt_e05	Area	rh_rostralanteriorcingulate	0.155232	-0.00669553	32552	0.40124	1
DYS_Pt_e05	Area	rh_superiorfrontal	0.159316	-0.00507526	32544	0.40124	1
DYS_Pt_0_001	Thickness	lh_transversetemporal	0.0826459	-0.00962032	32552	0.401423	1
NREP_Pt_1	Volume	rh_medialorbitofrontal	0.014208	0.0102846	32551	0.402561	1
WR_Pt_0_01	Volume	Left_Pallidum	0.0663717	0.00762158	32557	0.402971	1
WR_Pt_0_1	Area	rh_lateralorbitofrontal	0.0237232	0.00923707	32550	0.403294	1
DYS_Pt_0_01	Area	lh_lateralorbitofrontal	0.0623049	0.00693752	32548	0.403542	1
DYS_Pt_0_01	Area	rh_entorhinal	0.0712133	0.00915026	32519	0.403542	1
DYS_Pt_0_01	Area	rh_inferiorparietal	0.0659099	-0.0077436	32541	0.403542	1
DYS_Pt_0_001	Area	lh_insula	0.0536083	-0.00785569	32541	0.40504	1
DYS_Pt_1	Thickness	lh_pericalcarine	0.298729	-0.00567284	32551	0.406272	1
DYS_Pt_1	Thickness	rh_parahippocampal	0.304928	-0.00556197	32537	0.40657	1
WR_Pt_0_05	Volume	rh_transversetemporal	0.0191364	0.0118253	32523	0.406649	1
DYS_Pt_0_001	Volume	rh_paracentral	0.110802	-0.00752217	32526	0.409486	1
WR_Pt_0_01	Volume	lh_transversetemporal	0.0723758	0.00909618	32524	0.41013	1
WR_Pt_1e05	Area	lh_lateraloccipital	0.199567	-0.00545917	32544	0.411229	1
DYS_Pt_0_05	Volume	rh_middletemporal	0.159958	-0.00557132	32550	0.412012	1
NREAD_Pt_1	Volume	Left_Caudate	0.0358814	-0.00993368	32557	0.412153	1
NREAD_Pt_1	Volume	lh_bankssts	0.0559019	0.00934169	32491	0.412153	1
NREAD_Pt_1	Volume	lh_inferiorparietal	0.0139544	0.0109627	32544	0.412153	1
NREAD_Pt_1	Volume	lh_paracentral	0.0630352	-0.00878076	32530	0.412153	1
NREAD_Pt_1	Volume	lh_parstriangularis	0.0459955	-0.00956723	32535	0.412153	1
NREAD_Pt_1	Volume	lh_precuneus	0.062467	-0.00740824	32537	0.412153	1
NREAD_Pt_1	Volume	lh_rostralmiddlefrontal	0.0374899	-0.00778648	32545	0.412153	1
NREAD_Pt_1	Volume	lh_superiorfrontal	0.0477207	-0.0073502	32557	0.412153	1
NREAD_Pt_1	Volume	rh_inferiorparietal	0.0179731	0.00999055	32547	0.412153	1
NREAD_Pt_1	Volume	rh_parsopercularis	0.0468319	-0.00953408	32515	0.412153	1
NREAD_Pt_1	Volume	rh_precuneus	0.0441293	-0.00777446	32544	0.412153	1
NREAD_Pt_1	Volume	rh_supramarginal	0.0560957	-0.00831559	32544	0.412153	1
NREAD_Pt_1	Volume	Right_Caudate	0.0475726	-0.00921639	32557	0.412153	1
DYS_Pt_0_05	Thickness	lh_medialorbitofrontal	0.243539	-0.00639563	32539	0.414016	1
DYS_Pt_0_5	Thickness	lh_pericalcarine	0.29885	-0.00567198	32551	0.414731	1
DYS_Pt_0_5	Thickness	lh_superiorparietal	0.298651	-0.00552998	32535	0.414731	1
DYS_Pt_5e05	Volume	lh_transversetemporal	0.0587936	-0.00955077	32524	0.416455	1
DYS_Pt_0_001	Volume	Left_Thalamus_Proper	0.12309	0.0052689	32557	0.418507	1
DYS_Pt_0_001	Volume	rh_cuneus	0.119767	-0.00755364	32526	0.418507	1
DYS_Pt_1	Volume	Left_Thalamus_Proper	0.201907	-0.00437031	32557	0.418588	1
DYS_Pt_1	Volume	lh_inferiortemporal	0.19729	0.00541194	32539	0.418588	1
DYS_Pt_1	Volume	lh_paracentral	0.197329	-0.00608561	32530	0.418588	1
DYS_Pt_1	Volume	lh_parsorbitalis	0.196849	0.0060356	32540	0.418588	1
DYS_Pt_1	Volume	lh_rostralanteriorcingulate	0.189019	-0.00605372	32538	0.418588	1
DYS_Pt_1	Volume	lh_rostralmiddlefrontal	0.190862	0.00489285	32545	0.418588	1
DYS_Pt_0_1	Area	lh_bankssts	0.0739444	-0.00862777	32486	0.419018	1
NREP_Pt_0_001	Area	lh_lingual	0.011684	-0.0119174	32553	0.420696	0.794511
NREP_Pt_0_001	Area	lh_inferiortemporal	0.0123734	-0.010165	32541	0.420696	0.841392
DYS_Pt_0_001	Volume	lh_postcentral	0.129163	-0.00657453	32541	0.422262	1
DYS_Pt_0_5	Thickness	lh_temporalpole	0.311518	-0.00555626	32527	0.423664	1
DYS_Pt_1	Volume	lh_superiorparietal	0.210759	0.00548949	32548	0.426536	1
DYS_Pt_0_001	Volume	Brain_Stem	0.140663	-0.005354	32557	0.427012	1
DYS_Pt_0_001	Volume	Left_Accumbens_area	0.138388	0.00643888	32557	0.427012	1
DYS_Pt_0_05	Volume	lh_supramarginal	0.171527	-0.00588269	32540	0.42752	1
DYS_Pt_0_05	Volume	rh_pericalcarine	0.176038	0.00694477	32532	0.42752	1
DYS_Pt_0_05	Thickness	lh_middletemporal	0.269385	-0.00595679	32541	0.427533	1
DYS_Pt_0_05	Thickness	lh_superiorparietal	0.282926	-0.00571144	32535	0.427533	1
DYS_Pt_0_05	Thickness	rh_bankssts	0.278429	-0.00590073	32551	0.427533	1
DYS_Pt_0_05	Thickness	rh_caudalmiddlefrontal	0.278692	-0.00571323	32529	0.427533	1
DYS_Pt_0_05	Thickness	rh_medialorbitofrontal	0.261926	-0.00616743	32542	0.427533	1
DYS_Pt_0_1	Thickness	rh_pericalcarine	0.285402	-0.00585484	32554	0.431274	1
DYS_Pt_0_1	Volume	Right_Hippocampus	0.218507	-0.00504475	32557	0.431933	1
DYS_Pt_0_01	Area	lh_fusiform	0.0875704	-0.0067303	32544	0.432503	1
DYS_Pt_0_01	Area	rh_lingual	0.0890448	0.00801372	32551	0.432503	1
DYS_Pt_0_01	Volume	lh_caudalmiddlefrontal	0.213712	-0.00566393	32534	0.432512	1
NREAD_Pt_0_1	Area	rh_inferiorparietal	0.0127253	0.010503	32541	0.432661	0.865322
NREAD_Pt_1	Volume	rh_caudalanteriorcingulate	0.0712633	-0.00963465	32523	0.43267	1
DYS_Pt_1	Area	lh_parstriangularis	0.113059	-0.00751086	32536	0.433437	1
DYS_Pt_1	Area	lh_precuneus	0.114733	0.00628744	32538	0.433437	1
DYS_Pt_e05	Volume	Left_Pallidum	0.0596969	-0.00780556	32557	0.434466	1
DYS_Pt_e05	Volume	lh_lingual	0.0715591	0.00882685	32550	0.434466	1
DYS_Pt_e05	Volume	lh_superiortemporal	0.0660956	-0.00756579	32546	0.434466	1
DYS_Pt_e05	Volume	rh_superiorparietal	0.051035	0.00845658	32548	0.434466	1
DYS_Pt_e05	Volume	rh_transversetemporal	0.0644196	-0.009304	32523	0.434466	1
DYS_Pt_e05	Volume	Right_Agdala	0.0690555	-0.00722616	32557	0.434466	1
WR_Pt_1e05	Thickness	lh_inferiorparietal	0.134682	0.00787504	32518	0.435387	1
WR_Pt_1e05	Thickness	lh_parsopercularis	0.124231	0.00816549	32536	0.435387	1
WR_Pt_1e05	Thickness	lh_supramarginal	0.140861	0.00771317	32530	0.435387	1
WR_Pt_1e05	Thickness	rh_cuneus	0.129661	0.00831593	32550	0.435387	1
WR_Pt_1e05	Thickness	rh_parstriangularis	0.131145	0.0080143	32535	0.435387	1
NREAD_Pt_5e05	Volume	rh_inferiortemporal	0.0306813	-0.00881736	32544	0.436352	1
NREAD_Pt_5e05	Volume	rh_postcentral	0.0308013	-0.00952911	32537	0.436352	1
WR_Pt_1e05	Volume	lh_caudalanteriorcingulate	0.0298957	0.0115971	32537	0.436374	1
WR_Pt_1e05	Volume	rh_caudalanteriorcingulate	0.0462043	0.0106176	32523	0.436374	1
WR_Pt_1e05	Volume	rh_medialorbitofrontal	0.0427337	-0.00847423	32551	0.436374	1
WR_Pt_1e05	Volume	rh_parahippocampal	0.0227898	0.0119141	32518	0.436374	1
WR_Pt_1e05	Volume	rh_superiorfrontal	0.0313066	-0.00801584	32542	0.436374	1
WR_Pt_1e05	Volume	Right_Putamen	0.0419448	0.00864018	32557	0.436374	1
DYS_Pt_0_1	Thickness	rh_parahippocampal	0.295251	-0.00567434	32537	0.436458	1
DYS_Pt_0_5	Volume	Right_Thalamus_Proper	0.190007	-0.00441772	32557	0.436503	1
NREP_Pt_0_05	Thickness	lh_lateraloccipital	0.0375415	0.0112955	32551	0.436552	1
NREP_Pt_0_05	Thickness	lh_paracentral	0.0385193	0.0110043	32548	0.436552	1
NREP_Pt_0_05	Thickness	lh_postcentral	0.0248688	0.0119664	32550	0.436552	1
NREP_Pt_0_05	Thickness	lh_precentral	0.0371373	0.0109998	32534	0.436552	1
WR_Pt_0_05	Volume	lh_supramarginal	0.0384112	-0.00892289	32540	0.436918	1
WR_Pt_0_05	Volume	rh_postcentral	0.0394037	0.00913056	32537	0.436918	1
WR_Pt_0_05	Volume	rh_superiortemporal	0.0266537	0.00906376	32544	0.436918	1
WR_Pt_0_05	Volume	Right_Pallidum	0.0411217	0.0083378	32557	0.436918	1
PA_Pt_0_5	Volume	rh_precentral	0.0107013	-0.0109458	32551	0.437015	0.909614
PA_Pt_0_5	Volume	lh_middletemporal	0.0205654	0.00952877	32546	0.437015	1
PA_Pt_0_5	Volume	rh_parstriangularis	0.0160692	-0.0114421	32535	0.437015	1
PA_Pt_0_5	Volume	rh_supramarginal	0.0131571	-0.0107628	32544	0.437015	1
WR_Pt_0_1	Volume	lh_bankssts	0.0693564	0.00889826	32491	0.437598	1
WR_Pt_0_1	Volume	lh_inferiorparietal	0.0431498	0.00904215	32544	0.437598	1
WR_Pt_0_1	Volume	lh_lateraloccipital	0.0562598	0.00817709	32538	0.437598	1
WR_Pt_0_1	Volume	lh_medialorbitofrontal	0.0399587	0.00880842	32547	0.437598	1
WR_Pt_0_1	Volume	lh_middletemporal	0.0502909	0.0080983	32546	0.437598	1
WR_Pt_0_1	Volume	lh_parsorbitalis	0.062684	0.00873393	32540	0.437598	1
WR_Pt_0_1	Volume	lh_rostralanteriorcingulate	0.0725074	0.00830462	32538	0.437598	1
WR_Pt_0_1	Volume	rh_postcentral	0.0772231	0.00784635	32537	0.437598	1
WR_Pt_0_1	Volume	rh_posteriorcingulate	0.060801	-0.00886007	32538	0.437598	1
WR_Pt_5e05	Area	rh_parahippocampal	0.00648087	0.0126104	32520	0.438625	0.440699
WR_Pt_5e05	Area	lh_parahippocampal	0.0129007	0.0115994	32517	0.438625	0.877251
DYS_Pt_0_05	Volume	lh_posteriorcingulate	0.190379	-0.00623576	32534	0.439969	1
DYS_Pt_0_05	Volume	Right_Putamen	0.191516	0.00555941	32557	0.439969	1
DYS_Pt_1	Area	rh_entorhinal	0.123077	0.00783134	32519	0.440486	1
DYS_Pt_0_01	Volume	rh_parsopercularis	0.22812	-0.0057696	32515	0.440686	1
DYS_Pt_0_01	Volume	rh_precuneus	0.227294	-0.00465432	32544	0.440686	1
DYS_Pt_0_5	Volume	lh_parsorbitalis	0.197169	0.00603192	32540	0.441036	1
WR_Pt_1e05	Area	rh_caudalmiddlefrontal	0.223734	-0.00554214	32530	0.44111	1
WR_Pt_1e05	Area	rh_posteriorcingulate	0.227042	0.00535986	32530	0.44111	1
DYS_Pt_0_5	Volume	lh_temporalpole	0.202495	-0.00667629	32538	0.441335	1
PA_Pt_e05	Volume	Right_Accumbens_area	0.00954265	0.01144	32557	0.442027	0.811125
PA_Pt_e05	Volume	Left_Agdala	0.0204549	0.00961187	32557	0.442027	1
PA_Pt_e05	Volume	lh_entorhinal	0.0301663	0.011313	32472	0.442027	1
PA_Pt_e05	Volume	lh_insula	0.0260959	-0.00922268	32549	0.442027	1
PA_Pt_e05	Volume	lh_parstriangularis	0.0338162	-0.0101413	32535	0.442027	1
PA_Pt_e05	Volume	rh_middletemporal	0.0361355	0.00828642	32550	0.442027	1
PA_Pt_e05	Volume	rh_rostralmiddlefrontal	0.0364022	0.00800331	32543	0.442027	1
DYS_Pt_0_1	Volume	Left_Hippocampus	0.229479	-0.00490435	32557	0.443312	1
DYS_Pt_0_001	Volume	lh_isthmuscingulate	0.151301	-0.0063908	32519	0.443469	1
DYS_Pt_5e08	Volume	lh_entorhinal	0.0682308	-0.00951822	32472	0.446124	1
DYS_Pt_0_05	Area	lh_lateralorbitofrontal	0.052508	0.00722402	32548	0.446318	1
WR_Pt_1e05	Volume	Brain_Stem	0.0798574	0.00636456	32557	0.446447	1
WR_Pt_1e05	Volume	Left_Caudate	0.0592616	0.00890446	32557	0.446447	1
WR_Pt_1e05	Volume	Left_Putamen	0.099794	0.00693315	32557	0.446447	1
WR_Pt_1e05	Volume	lh_fusiform	0.0733151	-0.00762929	32542	0.446447	1
WR_Pt_1e05	Volume	lh_precuneus	0.0932166	-0.00665633	32537	0.446447	1
WR_Pt_1e05	Volume	lh_supramarginal	0.0810598	-0.00749038	32540	0.446447	1
WR_Pt_1e05	Volume	rh_lateralorbitofrontal	0.0757136	-0.00716754	32544	0.446447	1
WR_Pt_1e05	Volume	rh_parstriangularis	0.0928365	-0.00798745	32535	0.446447	1
WR_Pt_1e05	Volume	rh_precuneus	0.0956342	-0.0064179	32544	0.446447	1
WR_Pt_1e05	Volume	rh_rostralanteriorcingulate	0.0621149	0.00928219	32552	0.446447	1
DYS_Pt_0_05	Volume	Left_Putamen	0.199789	0.00541211	32557	0.446897	1
NREAD_Pt_0_001	Volume	Left_VentralDC	0.00849598	0.00911113	32557	0.447091	0.722158
NREAD_Pt_0_001	Volume	Left_Thalamus_Proper	0.0201519	0.00793631	32557	0.447091	1
NREAD_Pt_0_001	Volume	lh_precentral	0.0210396	0.00977653	32544	0.447091	1
NREAD_Pt_0_001	Volume	Right_Agdala	0.0204421	-0.00920575	32557	0.447091	1
WR_Pt_1	Thickness	lh_transversetemporal	0.00658231	0.0151742	32552	0.447597	0.447597
WR_Pt_0_05	Volume	Left_Putamen	0.0912695	0.00714059	32557	0.447835	1
WR_Pt_0_05	Volume	Left_VentralDC	0.0547133	0.00667866	32557	0.447835	1
WR_Pt_0_05	Volume	lh_bankssts	0.096518	0.00812875	32491	0.447835	1
WR_Pt_0_05	Volume	lh_lateraloccipital	0.0997956	0.00703733	32538	0.447835	1
WR_Pt_0_05	Volume	lh_middletemporal	0.0770663	0.00730118	32546	0.447835	1
WR_Pt_0_05	Volume	rh_lateralorbitofrontal	0.0913015	0.00683997	32544	0.447835	1
WR_Pt_0_05	Volume	rh_pericalcarine	0.0884135	-0.00875988	32532	0.447835	1
WR_Pt_0_05	Volume	rh_precentral	0.100104	0.00707823	32551	0.447835	1
WR_Pt_0_05	Volume	rh_superiorfrontal	0.0920721	0.00629525	32542	0.447835	1
WR_Pt_0_05	Volume	Right_Putamen	0.0773048	0.00753213	32557	0.447835	1
WR_Pt_0_05	Volume	Right_VentralDC	0.0626771	0.00648664	32557	0.447835	1
SP_Pt_1e05	Area	lh_parsorbitalis	0.0329631	-0.00916275	32545	0.448298	1
SP_Pt_1e05	Area	rh_lateraloccipital	0.0314771	0.00912841	32551	0.448298	1
WR_Pt_1e05	Thickness	rh_rostralmiddlefrontal	0.152224	0.00755798	32532	0.450052	1
NREP_Pt_0_05	Thickness	lh_parstriangularis	0.0527937	0.0103063	32539	0.450057	1
NREP_Pt_0_05	Thickness	lh_superiortemporal	0.0529479	0.0101454	32549	0.450057	1
DYS_Pt_0_05	Thickness	lh_frontalpole	0.311311	-0.00554276	32525	0.450407	1
DYS_Pt_0_05	Thickness	rh_caudalanteriorcingulate	0.310874	0.00552385	32535	0.450407	1
DYS_Pt_0_5	Area	lh_parsorbitalis	0.139152	0.00637322	32545	0.450589	1
DYS_Pt_0_5	Area	rh_entorhinal	0.136824	0.0075565	32519	0.450589	1
DYS_Pt_0_5	Area	rh_parstriangularis	0.132869	-0.00710886	32525	0.450589	1
SP_Pt_0_1	Area	lh_inferiorparietal	0.0265651	0.0097556	32535	0.451607	1
DYS_Pt_e05	Volume	rh_caudalmiddlefrontal	0.0797893	0.00804618	32530	0.452139	1
NREAD_Pt_0_01	Area	lh_inferiorparietal	0.018453	0.0103524	32535	0.452428	1
NREAD_Pt_0_01	Area	lh_parstriangularis	0.0199601	-0.0110054	32536	0.452428	1
NREAD_Pt_1	Volume	lh_lateralorbitofrontal	0.0799158	-0.00690069	32553	0.452856	1
NREP_Pt_5e05	Area	lh_precuneus	0.113276	0.00630024	32538	0.453105	1
NREAD_Pt_0_5	Volume	Left_Caudate	0.0240877	-0.0106786	32557	0.453119	1
NREAD_Pt_0_5	Volume	lh_inferiorparietal	0.0519556	0.00866628	32544	0.453119	1
NREAD_Pt_0_5	Volume	lh_parstriangularis	0.0573877	-0.00911095	32535	0.453119	1
NREAD_Pt_0_5	Volume	lh_rostralmiddlefrontal	0.0559491	-0.0071538	32545	0.453119	1
NREAD_Pt_0_5	Volume	lh_superiorfrontal	0.0381756	-0.00769552	32557	0.453119	1
NREAD_Pt_0_5	Volume	rh_caudalanteriorcingulate	0.0519733	-0.0103796	32523	0.453119	1
NREAD_Pt_0_5	Volume	rh_inferiorparietal	0.0283694	0.00925537	32547	0.453119	1
NREAD_Pt_0_5	Volume	rh_parsopercularis	0.0584205	-0.0090767	32515	0.453119	1
NREAD_Pt_0_5	Volume	rh_precuneus	0.0438791	-0.00778331	32544	0.453119	1
NREAD_Pt_0_5	Volume	rh_supramarginal	0.0586389	-0.00823075	32544	0.453119	1
NREAD_Pt_0_5	Volume	Right_Caudate	0.0273519	-0.0102639	32557	0.453119	1
DYS_Pt_0_001	Thickness	lh_cuneus	0.124522	-0.00840169	32557	0.453128	1
DYS_Pt_0_001	Thickness	lh_parsorbitalis	0.126609	0.00826711	32541	0.453128	1
DYS_Pt_0_001	Thickness	lh_pericalcarine	0.119321	-0.00848437	32551	0.453128	1
DYS_Pt_0_001	Thickness	rh_superiortemporal	0.125762	-0.00792473	32549	0.453128	1
DYS_Pt_0_001	Thickness	rh_supramarginal	0.112671	-0.00833759	32524	0.453128	1
SP_Pt_1e05	Area	rh_inferiorparietal	0.0400115	-0.00863463	32541	0.453464	1
DYS_Pt_0_5	Volume	lh_superiorparietal	0.214712	0.00544282	32548	0.456263	1
DYS_Pt_1	Thickness	lh_frontalpole	0.349473	-0.00512308	32525	0.457004	1
NREP_Pt_5e05	Area	lh_precentral	0.134711	0.00578739	32548	0.458017	1
NREP_Pt_5e05	Area	lh_superiortemporal	0.133546	0.00575642	32544	0.458017	1
NREP_Pt_5e05	Area	rh_caudalmiddlefrontal	0.121597	0.00705359	32530	0.458017	1
DYS_Pt_0_01	Volume	lh_isthmuscingulate	0.242502	-0.00520974	32519	0.45806	1
DYS_Pt_0_05	Thickness	lh_caudalanteriorcingulate	0.330263	0.00527982	32554	0.459369	1
DYS_Pt_0_05	Thickness	lh_isthmuscingulate	0.331016	-0.00528566	32545	0.459369	1
SP_Pt_0_05	Area	lh_parsopercularis	0.117843	0.00757529	32479	0.459993	1
SP_Pt_0_05	Area	lh_precentral	0.121763	0.00598694	32548	0.459993	1
NREAD_Pt_1	Volume	lh_parsopercularis	0.086701	-0.00824888	32498	0.460599	1
SP_Pt_0_1	Volume	lh_inferiorparietal	0.0271082	0.0098386	32544	0.46084	1
NREAD_Pt_5e05	Area	lh_frontalpole	0.0687541	0.00853107	32542	0.460867	1
NREAD_Pt_5e05	Area	lh_fusiform	0.0692147	-0.0071461	32544	0.460867	1
NREAD_Pt_5e05	Area	lh_parsorbitalis	0.0299695	0.00932377	32545	0.460867	1
NREAD_Pt_5e05	Area	lh_postcentral	0.0313202	-0.00831198	32535	0.460867	1
NREAD_Pt_5e05	Area	rh_caudalanteriorcingulate	0.0329269	0.0107305	32494	0.460867	1
NREAD_Pt_5e05	Area	rh_entorhinal	0.0813295	-0.00882547	32519	0.460867	1
NREAD_Pt_5e05	Area	rh_inferiorparietal	0.0811529	0.00733125	32541	0.460867	1
NREAD_Pt_5e05	Area	rh_inferiortemporal	0.0361008	-0.00819208	32549	0.460867	1
NREAD_Pt_5e05	Area	rh_middletemporal	0.0491628	-0.00736229	32540	0.460867	1
NREAD_Pt_5e05	Area	rh_postcentral	0.0446434	-0.00800311	32533	0.460867	1
NREAD_Pt_5e05	Area	rh_posteriorcingulate	0.0773133	0.00783154	32530	0.460867	1
NREAD_Pt_5e05	Area	rh_superiorfrontal	0.0249569	-0.0080746	32544	0.460867	1
WR_Pt_1e05	Volume	Left_Pallidum	0.129547	0.00628053	32557	0.461692	1
WR_Pt_1e05	Volume	lh_inferiorparietal	0.135792	0.00663287	32544	0.461692	1
WR_Pt_1e05	Volume	lh_middletemporal	0.127421	0.00627164	32546	0.461692	1
WR_Pt_1e05	Volume	lh_superiorfrontal	0.114873	-0.00583671	32557	0.461692	1
WR_Pt_1e05	Volume	rh_posteriorcingulate	0.131894	0.00708062	32538	0.461692	1
WR_Pt_1e05	Volume	rh_superiortemporal	0.124447	0.00625896	32544	0.461692	1
DYS_Pt_0_5	Thickness	rh_parahippocampal	0.346318	-0.00510617	32537	0.461757	1
DYS_Pt_0_5	Area	rh_precuneus	0.149735	0.00560041	32533	0.462819	1
SP_Pt_0_1	Area	rh_superiortemporal	0.0340651	0.0080887	32540	0.463286	1
DYS_Pt_e05	Volume	rh_parstriangularis	0.0873091	-0.00813038	32535	0.46383	1
DYS_Pt_1	Volume	rh_middletemporal	0.234768	-0.00471183	32550	0.464077	1
DYS_Pt_0_001	Area	lh_medialorbitofrontal	0.086238	-0.00679048	32549	0.465002	1
DYS_Pt_0_001	Area	lh_posteriorcingulate	0.108858	-0.00722937	32521	0.465002	1
DYS_Pt_0_001	Area	lh_transversetemporal	0.102076	-0.00791815	32495	0.465002	1
DYS_Pt_0_001	Area	rh_insula	0.109412	-0.00656744	32554	0.465002	1
DYS_Pt_0_001	Area	rh_lingual	0.0993938	0.00775889	32551	0.465002	1
DYS_Pt_0_001	Area	rh_medialorbitofrontal	0.0856425	-0.00641784	32555	0.465002	1
DYS_Pt_0_001	Area	rh_superiortemporal	0.0803487	-0.00666642	32540	0.465002	1
DYS_Pt_5e08	Thickness	lh_medialorbitofrontal	0.0791191	0.00960704	32539	0.465594	1
DYS_Pt_5e08	Thickness	lh_parsopercularis	0.0958576	0.00884319	32536	0.465594	1
DYS_Pt_5e08	Thickness	lh_parstriangularis	0.0915734	0.00896569	32539	0.465594	1
DYS_Pt_5e08	Thickness	lh_superiorparietal	0.0721987	0.00954091	32535	0.465594	1
DYS_Pt_5e08	Thickness	rh_parstriangularis	0.0823695	0.00921956	32535	0.465594	1
DYS_Pt_5e08	Thickness	rh_pericalcarine	0.0855254	-0.0094004	32554	0.465594	1
DYS_Pt_5e08	Thickness	rh_superiorfrontal	0.0923707	0.00857045	32532	0.465594	1
DYS_Pt_1	Area	lh_parsorbitalis	0.143951	0.00629623	32545	0.466127	1
DYS_Pt_1	Area	rh_parstriangularis	0.142079	-0.00694362	32525	0.466127	1
WR_Pt_1	Volume	lh_insula	0.0494802	0.00820883	32549	0.467313	1
DYS_Pt_0_05	Area	lh_caudalanteriorcingulate	0.0967696	-0.00836631	32483	0.470024	1
DYS_Pt_0_05	Area	lh_cuneus	0.080267	0.00843856	32533	0.470024	1
DYS_Pt_0_05	Area	lh_frontalpole	0.0803473	0.00821964	32542	0.470024	1
DYS_Pt_0_05	Area	rh_cuneus	0.0919652	0.00780886	32539	0.470024	1
DYS_Pt_0_05	Area	rh_lingual	0.0868793	0.00807769	32551	0.470024	1
DYS_Pt_0_05	Area	rh_transversetemporal	0.0897632	-0.0079663	32513	0.470024	1
DYS_Pt_1	Thickness	lh_caudalmiddlefrontal	0.369272	-0.00473118	32528	0.473783	1
SP_Pt_0_1	Volume	Brain_Stem	0.0334805	0.00773564	32557	0.474307	1
DYS_Pt_0_05	Area	lh_bankssts	0.105024	-0.007825	32486	0.476108	1
DYS_Pt_1	Volume	rh_parahippocampal	0.246661	-0.00607555	32518	0.476504	1
SP_Pt_0_05	Volume	Left_Accumbens_area	0.0789771	-0.00763428	32557	0.476944	1
SP_Pt_0_05	Volume	lh_medialorbitofrontal	0.0676988	0.00779265	32547	0.476944	1
SP_Pt_0_05	Volume	lh_parsopercularis	0.057338	0.00912801	32498	0.476944	1
SP_Pt_0_05	Volume	lh_postcentral	0.0883868	0.0073839	32541	0.476944	1
SP_Pt_0_05	Volume	rh_caudalanteriorcingulate	0.0889593	0.00906122	32523	0.476944	1
SP_Pt_0_05	Volume	rh_lingual	0.0897777	-0.00836166	32550	0.476944	1
SP_Pt_0_05	Volume	rh_postcentral	0.0859407	0.00758461	32537	0.476944	1
SP_Pt_0_05	Volume	Right_Putamen	0.0829883	-0.00736551	32557	0.476944	1
DYS_Pt_1	Volume	rh_paracentral	0.252581	-0.005409	32526	0.477097	1
DYS_Pt_1	Volume	rh_caudalmiddlefrontal	0.259035	0.00519283	32530	0.478651	1
NREAD_Pt_1	Volume	rh_paracentral	0.0958133	-0.00787907	32526	0.479066	1
DYS_Pt_0_1	Volume	lh_isthmuscingulate	0.259436	-0.00503355	32519	0.479393	1
DYS_Pt_0_1	Volume	Right_Caudate	0.257206	0.00526757	32557	0.479393	1
WR_Pt_0_1	Area	rh_posteriorcingulate	0.03533	-0.00938953	32530	0.480488	1
PA_Pt_0_5	Volume	lh_supramarginal	0.0282692	-0.0094186	32540	0.480576	1
DYS_Pt_0_1	Thickness	lh_temporalpole	0.332267	-0.00532233	32527	0.480727	1
SP_Pt_0_1	Volume	rh_postcentral	0.0396175	0.00909761	32537	0.48107	1
DYS_Pt_0_1	Thickness	lh_frontalpole	0.340165	-0.0052227	32525	0.4819	1
DYS_Pt_0_01	Volume	rh_caudalanteriorcingulate	0.260821	-0.00599458	32523	0.481951	1
DYS_Pt_0_1	Area	lh_caudalanteriorcingulate	0.141784	-0.00740295	32483	0.482066	1
DYS_Pt_0_1	Area	lh_fusiform	0.122655	-0.00608964	32544	0.482066	1
DYS_Pt_0_1	Area	lh_parsorbitalis	0.104548	0.00699383	32545	0.482066	1
DYS_Pt_0_1	Area	lh_rostralmiddlefrontal	0.12782	0.00562907	32547	0.482066	1
DYS_Pt_0_1	Area	lh_superiortemporal	0.136511	-0.00572419	32544	0.482066	1
DYS_Pt_0_1	Area	rh_entorhinal	0.127513	0.00773977	32519	0.482066	1
DYS_Pt_0_1	Area	rh_lingual	0.10156	0.00772649	32551	0.482066	1
DYS_Pt_0_1	Area	rh_precuneus	0.123925	0.00598078	32533	0.482066	1
DYS_Pt_0_1	Thickness	lh_caudalanteriorcingulate	0.348389	0.0050863	32554	0.483479	1
DYS_Pt_0_001	Thickness	rh_entorhinal	0.142225	-0.00802516	32502	0.483565	1
SP_Pt_0_1	Volume	Left_Accumbens_area	0.119869	-0.00676615	32557	0.485217	1
SP_Pt_0_1	Volume	Left_Caudate	0.0938898	-0.00791795	32557	0.485217	1
SP_Pt_0_1	Volume	lh_bankssts	0.0727071	0.00875517	32491	0.485217	1
SP_Pt_0_1	Volume	lh_lateralorbitofrontal	0.119877	-0.00611874	32553	0.485217	1
SP_Pt_0_1	Volume	lh_lingual	0.10736	-0.00789302	32550	0.485217	1
SP_Pt_0_1	Volume	lh_postcentral	0.0860494	0.0074462	32541	0.485217	1
SP_Pt_0_1	Volume	lh_supramarginal	0.086658	-0.00736515	32540	0.485217	1
SP_Pt_0_1	Volume	rh_caudalmiddlefrontal	0.113835	0.00726727	32530	0.485217	1
SP_Pt_0_1	Volume	rh_middletemporal	0.103373	0.00645207	32550	0.485217	1
SP_Pt_0_1	Volume	rh_parstriangularis	0.110916	0.00758537	32535	0.485217	1
SP_Pt_0_1	Volume	rh_superiortemporal	0.0617289	0.00762014	32544	0.485217	1
SP_Pt_0_1	Volume	rh_transversetemporal	0.0581034	0.00954071	32523	0.485217	1
SP_Pt_0_1	Volume	Right_Caudate	0.0656586	-0.00854911	32557	0.485217	1
SP_Pt_0_1	Volume	Right_VentralDC	0.0609724	0.00651263	32557	0.485217	1
DYS_Pt_0_1	Volume	lh_superiorparietal	0.26906	0.00484784	32548	0.486598	1
WR_Pt_0_1	Volume	Left_Thalamus_Proper	0.0993921	0.00566172	32557	0.487179	1
WR_Pt_0_1	Volume	lh_precentral	0.0999153	0.00701272	32544	0.487179	1
WR_Pt_0_1	Volume	rh_bankssts	0.11463	0.0077618	32530	0.487179	1
WR_Pt_0_1	Volume	rh_insula	0.108513	0.00656675	32550	0.487179	1
WR_Pt_0_1	Volume	rh_parsorbitalis	0.110771	0.00742026	32539	0.487179	1
WR_Pt_5e05	Volume	rh_parahippocampal	0.00656491	0.014221	32518	0.487801	0.558017
WR_Pt_5e05	Volume	rh_lateraloccipital	0.0158585	0.0101827	32548	0.487801	1
WR_Pt_5e05	Volume	rh_parstriangularis	0.0172165	-0.01132	32535	0.487801	1
DYS_Pt_1	Area	lh_lateralorbitofrontal	0.158093	0.00526017	32548	0.488651	1
DYS_Pt_0_5	Volume	Left_Thalamus_Proper	0.240259	-0.0040221	32557	0.490572	1
DYS_Pt_0_5	Volume	lh_paracentral	0.2424	-0.00551884	32530	0.490572	1
DYS_Pt_e05	Area	lh_middletemporal	0.209228	-0.00490424	32547	0.490604	1
DYS_Pt_e05	Area	lh_temporalpole	0.202438	-0.005934	32545	0.490604	1
WR_Pt_1e05	Thickness	lh_lateraloccipital	0.173197	0.00738826	32551	0.490724	1
DYS_Pt_5e05	Volume	rh_medialorbitofrontal	0.0809953	-0.00729987	32551	0.491757	1
DYS_Pt_5e05	Volume	Right_VentralDC	0.076416	-0.00615317	32557	0.491757	1
DYS_Pt_5e08	Area	rh_frontalpole	0.224791	-0.00571156	32552	0.49309	1
DYS_Pt_0_1	Area	rh_superiortemporal	0.152422	-0.00546739	32540	0.493558	1
NREAD_Pt_0_001	Volume	Brain_Stem	0.0467009	0.007225	32557	0.496197	1
NREAD_Pt_0_001	Volume	lh_caudalanteriorcingulate	0.029819	0.0115984	32537	0.496197	1
NREAD_Pt_0_001	Volume	Right_Accumbens_area	0.0443301	0.00887731	32557	0.496197	1
NREAD_Pt_0_001	Volume	Right_Thalamus_Proper	0.037695	0.00698619	32557	0.496197	1
WR_Pt_0_05	Volume	lh_cuneus	0.116961	-0.00778299	32517	0.497083	1
DYS_Pt_0_5	Thickness	lh_caudalmiddlefrontal	0.380474	-0.00462196	32528	0.497542	1
WR_Pt_0_05	Volume	lh_paracentral	0.1278	0.00719958	32530	0.497572	1
WR_Pt_0_05	Volume	lh_superiorparietal	0.131403	-0.00662734	32548	0.497572	1
WR_Pt_0_05	Volume	rh_parsopercularis	0.134637	0.00718225	32515	0.497572	1
WR_Pt_0_1	Volume	Right_VentralDC	0.123278	0.0053801	32557	0.498983	1
DYS_Pt_0_001	Volume	Left_VentralDC	0.177681	-0.00466864	32557	0.499831	1
DYS_Pt_0_001	Volume	lh_caudalanteriorcingulate	0.188172	-0.00702883	32537	0.499831	1
DYS_Pt_0_001	Volume	rh_postcentral	0.187159	-0.00582494	32537	0.499831	1
SP_Pt_0_01	Area	lh_inferiorparietal	0.0643067	0.00812608	32535	0.500192	1
SP_Pt_0_01	Area	lh_lingual	0.0807506	-0.00825681	32553	0.500192	1
SP_Pt_0_01	Area	lh_rostralanteriorcingulate	0.0809135	0.00762711	32533	0.500192	1
SP_Pt_0_01	Area	rh_caudalanteriorcingulate	0.079041	0.00884027	32494	0.500192	1
SP_Pt_0_01	Area	rh_rostralanteriorcingulate	0.0753736	0.00837038	32552	0.500192	1
SP_Pt_0_01	Area	rh_rostralmiddlefrontal	0.0467025	0.00746097	32542	0.500192	1
SP_Pt_0_01	Area	rh_superiortemporal	0.0655241	0.00701888	32540	0.500192	1
DYS_Pt_0_001	Thickness	rh_caudalanteriorcingulate	0.168416	0.00749264	32535	0.502674	1
DYS_Pt_0_001	Thickness	rh_lingual	0.169783	-0.00744537	32554	0.502674	1
DYS_Pt_0_001	Thickness	rh_pericalcarine	0.170022	-0.00750387	32554	0.502674	1
DYS_Pt_0_1	Volume	Right_Thalamus_Proper	0.284541	-0.00360697	32557	0.503876	1
WR_Pt_0_05	Volume	Left_Thalamus_Proper	0.144387	0.00500628	32557	0.503943	1
WR_Pt_0_05	Volume	lh_caudalanteriorcingulate	0.154147	0.00763949	32537	0.503943	1
WR_Pt_0_05	Volume	rh_insula	0.152379	0.00584549	32550	0.503943	1
WR_Pt_1	Volume	lh_rostralanteriorcingulate	0.0593125	0.00873754	32538	0.504157	1
DYS_Pt_0_001	Thickness	lh_entorhinal	0.185489	-0.00724383	32468	0.504531	1
DYS_Pt_0_001	Thickness	rh_paracentral	0.181078	-0.00712445	32548	0.504531	1
NREAD_Pt_0_5	Volume	lh_lateralorbitofrontal	0.0890705	-0.00669999	32553	0.504733	1
NREAD_Pt_0_5	Volume	lh_paracentral	0.0811026	-0.00823899	32530	0.504733	1
NREAD_Pt_0_5	Volume	lh_precuneus	0.08623	-0.00682207	32537	0.504733	1
NREAD_Pt_0_5	Volume	rh_paracentral	0.0857877	-0.0081273	32526	0.504733	1
NREAD_Pt_5e05	Area	lh_superiortemporal	0.0964978	-0.00637067	32544	0.504758	1
DYS_Pt_5e08	Volume	Left_Accumbens_area	0.132051	0.00654214	32557	0.5048	1
DYS_Pt_5e08	Volume	Left_Pallidum	0.119744	-0.00644435	32557	0.5048	1
DYS_Pt_5e08	Volume	lh_fusiform	0.136373	-0.00634354	32542	0.5048	1
DYS_Pt_5e08	Volume	lh_isthmuscingulate	0.119811	0.00692566	32519	0.5048	1
DYS_Pt_5e08	Volume	lh_lingual	0.136593	0.00728641	32550	0.5048	1
DYS_Pt_5e08	Volume	lh_precentral	0.112081	0.00673326	32544	0.5048	1
DYS_Pt_5e08	Volume	lh_superiortemporal	0.120865	-0.00638089	32546	0.5048	1
DYS_Pt_5e08	Volume	lh_transversetemporal	0.102462	-0.00824868	32524	0.5048	1
DYS_Pt_5e08	Volume	rh_cuneus	0.12601	0.00742639	32526	0.5048	1
DYS_Pt_5e08	Volume	rh_precuneus	0.131761	-0.0058033	32544	0.5048	1
DYS_Pt_5e05	Volume	Right_Agdala	0.0894903	-0.006748	32557	0.507112	1
DYS_Pt_0_001	Volume	rh_superiorparietal	0.197006	0.00558901	32548	0.50744	1
DYS_Pt_0_05	Area	rh_precuneus	0.119472	0.00605155	32533	0.507756	1
PA_Pt_1	Volume	rh_caudalmiddlefrontal	0.0359054	-0.00963209	32530	0.50866	1
NREAD_Pt_1	Volume	lh_caudalanteriorcingulate	0.119738	0.00833335	32537	0.508885	1
NREAD_Pt_1	Volume	lh_cuneus	0.114481	-0.00782881	32517	0.508885	1
NREAD_Pt_1	Volume	lh_supramarginal	0.110663	-0.00686883	32540	0.508885	1
DYS_Pt_0_001	Thickness	lh_paracentral	0.195483	-0.00687637	32548	0.509389	1
DYS_Pt_0_001	Thickness	lh_parsopercularis	0.202258	-0.00677375	32536	0.509389	1
WR_Pt_1e05	Volume	rh_paracentral	0.158746	-0.00664796	32526	0.510989	1
WR_Pt_1e05	Volume	rh_parsopercularis	0.162314	-0.00668299	32515	0.510989	1
PA_Pt_e05	Volume	lh_pericalcarine	0.0541235	0.00991085	32531	0.511166	1
PA_Pt_e05	Volume	rh_lingual	0.0487252	0.009707	32550	0.511166	1
SP_Pt_0_1	Volume	Left_Thalamus_Proper	0.138524	0.00506767	32557	0.511936	1
SP_Pt_0_1	Volume	Left_VentralDC	0.136752	0.00515976	32557	0.511936	1
DYS_Pt_5e08	Area	lh_precuneus	0.24096	-0.00466256	32538	0.51204	1
DYS_Pt_0_05	Volume	rh_parahippocampal	0.235002	-0.00622673	32518	0.512184	1
NREP_Pt_0_05	Thickness	lh_caudalmiddlefrontal	0.0790672	0.00924372	32528	0.512484	1
NREP_Pt_0_05	Thickness	lh_lingual	0.079297	0.00944577	32555	0.512484	1
NREP_Pt_0_05	Thickness	lh_parsorbitalis	0.0904383	0.00917317	32541	0.512484	1
NREP_Pt_0_05	Thickness	rh_parahippocampal	0.0851929	-0.00932215	32537	0.512484	1
SP_Pt_0_05	Area	rh_rostralanteriorcingulate	0.143713	0.00688572	32552	0.514342	1
WR_Pt_0_01	Volume	lh_supramarginal	0.0969182	-0.00714149	32540	0.514878	1
PA_Pt_1	Thickness	rh_caudalmiddlefrontal	0.00792236	-0.0139773	32529	0.515341	0.53872
PA_Pt_1	Thickness	rh_precentral	0.0151571	-0.0127792	32525	0.515341	1
SP_Pt_0_05	Volume	Brain_Stem	0.157719	0.00513482	32557	0.515621	1
SP_Pt_0_05	Volume	Left_Thalamus_Proper	0.103475	0.0055647	32557	0.515621	1
SP_Pt_0_05	Volume	lh_insula	0.12924	0.00629373	32549	0.515621	1
SP_Pt_0_05	Volume	lh_pericalcarine	0.11954	-0.00801711	32531	0.515621	1
SP_Pt_0_05	Volume	rh_caudalmiddlefrontal	0.129508	0.00696081	32530	0.515621	1
SP_Pt_0_05	Volume	rh_middletemporal	0.137964	0.00587062	32550	0.515621	1
SP_Pt_0_05	Volume	rh_paracentral	0.154759	0.00671362	32526	0.515621	1
SP_Pt_0_05	Volume	rh_transversetemporal	0.151543	0.00721339	32523	0.515621	1
SP_Pt_0_05	Volume	Right_Caudate	0.13686	-0.00690204	32557	0.515621	1
SP_Pt_0_05	Volume	Right_VentralDC	0.139631	0.00512927	32557	0.515621	1
NREP_Pt_5e05	Area	rh_fusiform	0.174714	0.00530454	32548	0.516545	1
NREP_Pt_5e05	Area	rh_precuneus	0.172813	0.00528902	32533	0.516545	1
NREP_Pt_5e05	Area	rh_superiorfrontal	0.159817	0.00506782	32544	0.516545	1
NREAD_Pt_1	Thickness	rh_inferiorparietal	0.038066	-0.0108354	32522	0.517698	1
SP_Pt_0_05	Area	lh_bankssts	0.152272	0.00689763	32486	0.517726	1
SP_Pt_0_01	Volume	lh_caudalmiddlefrontal	0.0121873	0.0114045	32534	0.517961	1
DYS_Pt_0_1	Area	rh_inferiorparietal	0.175389	-0.00571341	32541	0.518542	1
DYS_Pt_0_1	Area	rh_medialorbitofrontal	0.170972	-0.0051231	32555	0.518542	1
PA_Pt_5e05	Area	rh_pericalcarine	0.0763193	0.00901637	32545	0.518971	1
NREAD_Pt_0_01	Volume	rh_inferiorparietal	0.0122544	0.0105452	32547	0.520811	1
NREAD_Pt_0_01	Volume	Right_Pallidum	0.0122398	0.0101889	32557	0.520811	1
SP_Pt_0_1	Thickness	lh_paracentral	0.01363	0.0131186	32548	0.522516	0.926842
SP_Pt_0_1	Thickness	lh_precentral	0.0230522	0.0119937	32534	0.522516	1
SP_Pt_0_1	Thickness	rh_precentral	0.0201457	0.0122398	32525	0.522516	1
SP_Pt_1e05	Area	lh_medialorbitofrontal	0.0538539	-0.0076267	32549	0.523152	1
NREAD_Pt_0_001	Thickness	lh_caudalanteriorcingulate	0.0153725	0.0131111	32554	0.523485	1
NREAD_Pt_0_001	Thickness	lh_entorhinal	0.0153966	0.0132499	32468	0.523485	1
DYS_Pt_e05	Area	lh_lateralorbitofrontal	0.231063	-0.00445534	32548	0.523743	1
NREAD_Pt_0_001	Volume	lh_entorhinal	0.0618508	0.00974661	32472	0.525732	1
NREAD_Pt_0_001	Volume	lh_paracentral	0.0599744	0.00885627	32530	0.525732	1
PA_Pt_1	Volume	rh_parsopercularis	0.0433332	-0.00966451	32515	0.526189	1
WR_Pt_0_05	Volume	lh_rostralanteriorcingulate	0.167155	0.0063765	32538	0.526227	1
SP_Pt_0_1	Area	lh_insula	0.0607102	0.00764321	32541	0.526808	1
SP_Pt_0_1	Area	lh_supramarginal	0.0619774	-0.00792729	32533	0.526808	1
SP_Pt_0_1	Area	rh_bankssts	0.055691	0.00915509	32522	0.526808	1
WR_Pt_1e05	Thickness	rh_lateralorbitofrontal	0.194051	0.00713191	32553	0.527818	1
DYS_Pt_5e05	Volume	Left_Pallidum	0.124216	-0.00637129	32557	0.527917	1
DYS_Pt_5e05	Volume	lh_lingual	0.105991	0.00791688	32550	0.527917	1
DYS_Pt_5e05	Volume	rh_caudalmiddlefrontal	0.11437	0.00724996	32530	0.527917	1
DYS_Pt_5e05	Volume	rh_parstriangularis	0.109048	-0.00761864	32535	0.527917	1
DYS_Pt_5e05	Volume	rh_superiorparietal	0.123419	0.00667572	32548	0.527917	1
DYS_Pt_5e08	Thickness	lh_superiorfrontal	0.116531	0.00797235	32527	0.528273	1
WR_Pt_1e05	Volume	lh_bankssts	0.196177	0.00629791	32491	0.531131	1
WR_Pt_1e05	Volume	lh_entorhinal	0.237447	-0.00616835	32472	0.531131	1
WR_Pt_1e05	Volume	lh_frontalpole	0.235039	0.0061206	32523	0.531131	1
WR_Pt_1e05	Volume	lh_isthmuscingulate	0.175521	-0.00603298	32519	0.531131	1
WR_Pt_1e05	Volume	lh_parahippocampal	0.221913	0.00643048	32532	0.531131	1
WR_Pt_1e05	Volume	lh_posteriorcingulate	0.222409	0.00579856	32534	0.531131	1
WR_Pt_1e05	Volume	lh_rostralmiddlefrontal	0.218811	-0.00458944	32545	0.531131	1
WR_Pt_1e05	Volume	lh_superiorparietal	0.183993	-0.00581449	32548	0.531131	1
WR_Pt_1e05	Volume	rh_lateraloccipital	0.227562	0.00509439	32548	0.531131	1
WR_Pt_1e05	Volume	Right_Caudate	0.221337	0.00567316	32557	0.531131	1
WR_Pt_1e05	Volume	Right_Hippocampus	0.223916	0.00497493	32557	0.531131	1
DYS_Pt_0_5	Area	lh_rostralmiddlefrontal	0.179652	0.00496089	32547	0.531144	1
DYS_Pt_0_1	Volume	rh_parstriangularis	0.306457	-0.00487151	32535	0.531609	1
DYS_Pt_0_01	Volume	rh_rostralmiddlefrontal	0.293953	-0.00402006	32543	0.531617	1
DYS_Pt_0_05	Volume	lh_middletemporal	0.256752	-0.00467561	32546	0.53229	1
DYS_Pt_0_05	Volume	lh_rostralmiddlefrontal	0.252703	0.00427761	32545	0.53229	1
WR_Pt_0_1	Area	lh_bankssts	0.0811169	0.00844951	32486	0.532413	1
WR_Pt_0_1	Area	lh_inferiorparietal	0.122476	0.00682323	32535	0.532413	1
WR_Pt_0_1	Area	lh_medialorbitofrontal	0.13133	0.00600524	32549	0.532413	1
WR_Pt_0_1	Area	lh_middletemporal	0.115989	0.00616995	32547	0.532413	1
WR_Pt_0_1	Area	lh_parsorbitalis	0.113272	0.00684613	32545	0.532413	1
WR_Pt_0_1	Area	lh_supramarginal	0.0551711	-0.00817957	32533	0.532413	1
WR_Pt_0_1	Area	rh_frontalpole	0.133103	0.00710819	32552	0.532413	1
WR_Pt_0_1	Area	rh_insula	0.0684284	0.00751667	32554	0.532413	1
WR_Pt_0_1	Area	rh_medialorbitofrontal	0.0653465	0.00691887	32555	0.532413	1
WR_Pt_0_1	Area	rh_paracentral	0.110294	-0.00707045	32530	0.532413	1
WR_Pt_0_1	Area	rh_parahippocampal	0.127648	0.00709683	32520	0.532413	1
WR_Pt_0_1	Area	rh_parstriangularis	0.0939087	0.00794851	32525	0.532413	1
PA_Pt_5e05	Volume	lh_lingual	0.0443597	0.0098438	32550	0.53252	1
PA_Pt_5e05	Volume	lh_parstriangularis	0.0295441	-0.0104034	32535	0.53252	1
PA_Pt_5e05	Volume	lh_rostralmiddlefrontal	0.0370237	0.00778295	32545	0.53252	1
PA_Pt_5e05	Volume	lh_superiorfrontal	0.0568065	0.00705099	32557	0.53252	1
PA_Pt_5e05	Volume	lh_temporalpole	0.0626494	-0.0097284	32538	0.53252	1
PA_Pt_5e05	Volume	rh_lateralorbitofrontal	0.0230122	-0.00917305	32544	0.53252	1
PA_Pt_5e05	Volume	rh_rostralmiddlefrontal	0.050646	0.0074792	32543	0.53252	1
PA_Pt_5e05	Volume	rh_temporalpole	0.0446028	-0.0104701	32530	0.53252	1
DYS_Pt_0_05	Volume	lh_caudalanteriorcingulate	0.266537	-0.00594606	32537	0.532909	1
DYS_Pt_0_05	Volume	lh_isthmuscingulate	0.269589	-0.0049267	32519	0.532909	1
DYS_Pt_0_05	Thickness	lh_bankssts	0.399488	-0.00460677	32545	0.533318	1
DYS_Pt_0_05	Thickness	rh_pericalcarine	0.399988	-0.00461193	32554	0.533318	1
DYS_Pt_e05	Area	lh_parahippocampal	0.244529	-0.00543225	32517	0.536386	1
DYS_Pt_0_01	Volume	Left_Accumbens_area	0.315591	0.00436455	32557	0.536505	1
DYS_Pt_0_01	Volume	Left_Caudate	0.312194	-0.00477539	32557	0.536505	1
DYS_Pt_0_01	Volume	Right_Agdala	0.312446	-0.0040165	32557	0.536505	1
NREP_Pt_0_05	Thickness	lh_cuneus	0.111222	0.00872156	32557	0.536787	1
NREP_Pt_0_05	Thickness	lh_entorhinal	0.217232	0.0067587	32468	0.536787	1
NREP_Pt_0_05	Thickness	lh_inferiortemporal	0.275935	0.00595232	32546	0.536787	1
NREP_Pt_0_05	Thickness	lh_insula	0.145576	0.0079549	32554	0.536787	1
NREP_Pt_0_05	Thickness	lh_lateralorbitofrontal	0.147538	0.0079573	32541	0.536787	1
NREP_Pt_0_05	Thickness	lh_medialorbitofrontal	0.201207	0.00700356	32539	0.536787	1
NREP_Pt_0_05	Thickness	lh_middletemporal	0.212626	0.00671655	32541	0.536787	1
NREP_Pt_0_05	Thickness	lh_pericalcarine	0.254516	0.00621372	32551	0.536787	1
NREP_Pt_0_05	Thickness	lh_posteriorcingulate	0.239321	0.00644231	32545	0.536787	1
NREP_Pt_0_05	Thickness	lh_rostralanteriorcingulate	0.278723	0.00582925	32548	0.536787	1
NREP_Pt_0_05	Thickness	lh_rostralmiddlefrontal	0.190455	0.00683624	32533	0.536787	1
NREP_Pt_0_05	Thickness	lh_superiorfrontal	0.124396	0.00781666	32527	0.536787	1
NREP_Pt_0_05	Thickness	lh_supramarginal	0.24784	0.00606021	32530	0.536787	1
NREP_Pt_0_05	Thickness	lh_transversetemporal	0.279778	0.00599808	32552	0.536787	1
NREP_Pt_0_05	Thickness	rh_caudalanteriorcingulate	0.243161	-0.00635644	32535	0.536787	1
NREP_Pt_0_05	Thickness	rh_insula	0.272043	0.00600888	32551	0.536787	1
NREP_Pt_0_05	Thickness	rh_paracentral	0.277302	0.00579379	32548	0.536787	1
NREP_Pt_0_05	Thickness	rh_parsopercularis	0.188962	0.00702107	32527	0.536787	1
NREP_Pt_0_05	Thickness	rh_parsorbitalis	0.284181	0.00577799	32536	0.536787	1
NREP_Pt_0_05	Thickness	rh_parstriangularis	0.166467	0.00735465	32535	0.536787	1
NREP_Pt_0_05	Thickness	rh_precentral	0.204362	0.00668578	32525	0.536787	1
NREP_Pt_0_05	Thickness	rh_precuneus	0.174111	0.00717617	32538	0.536787	1
NREP_Pt_0_05	Thickness	rh_rostralmiddlefrontal	0.279567	0.00571496	32532	0.536787	1
NREP_Pt_0_05	Thickness	rh_superiortemporal	0.206463	0.00654664	32549	0.536787	1
DYS_Pt_5e08	Volume	rh_superiorfrontal	0.151847	-0.00533364	32542	0.537792	1
NREP_Pt_0_05	Thickness	lh_parahippocampal	0.311305	-0.00550204	32554	0.538587	1
NREP_Pt_0_05	Thickness	lh_temporalpole	0.316816	0.00548939	32527	0.538587	1
NREP_Pt_0_05	Thickness	rh_cuneus	0.31666	0.00550147	32550	0.538587	1
NREP_Pt_0_05	Thickness	rh_lateralorbitofrontal	0.297019	0.00573384	32553	0.538587	1
WR_Pt_0_1	Volume	Left_Agdala	0.165865	-0.00578096	32557	0.539345	1
WR_Pt_0_1	Volume	Left_VentralDC	0.163362	0.00485432	32557	0.539345	1
WR_Pt_0_1	Volume	lh_inferiortemporal	0.189533	0.00552503	32539	0.539345	1
WR_Pt_0_1	Volume	lh_supramarginal	0.216735	-0.0053332	32540	0.539345	1
WR_Pt_0_1	Volume	rh_caudalmiddlefrontal	0.200453	0.00590966	32530	0.539345	1
WR_Pt_0_1	Volume	rh_frontalpole	0.1992	0.00672303	32501	0.539345	1
WR_Pt_0_1	Volume	rh_inferiortemporal	0.18693	0.00541853	32544	0.539345	1
WR_Pt_0_1	Volume	rh_parsopercularis	0.192216	0.00627153	32515	0.539345	1
WR_Pt_0_1	Volume	rh_parstriangularis	0.139615	0.00705967	32535	0.539345	1
WR_Pt_0_1	Volume	rh_precentral	0.210071	0.00540495	32551	0.539345	1
WR_Pt_0_1	Volume	rh_precuneus	0.222083	0.0047289	32544	0.539345	1
WR_Pt_0_1	Volume	rh_rostralanteriorcingulate	0.214225	0.00621462	32552	0.539345	1
WR_Pt_0_1	Volume	Right_Pallidum	0.219815	0.00501845	32557	0.539345	1
WR_Pt_0_1	Volume	Right_Thalamus_Proper	0.173889	0.00459841	32557	0.539345	1
DYS_Pt_0_5	Thickness	lh_frontalpole	0.420943	-0.00440717	32525	0.540078	1
NREP_Pt_5e05	Area	lh_frontalpole	0.191023	0.00613542	32542	0.541231	1
SP_Pt_0_05	Volume	Left_Putamen	0.174347	-0.00572337	32557	0.541386	1
SP_Pt_0_05	Volume	lh_lingual	0.178339	-0.00659097	32550	0.541386	1
WR_Pt_0_05	Area	lh_cuneus	0.0798375	-0.00846534	32533	0.542895	1
WR_Pt_0_05	Area	lh_middletemporal	0.0752811	0.00696958	32547	0.542895	1
PA_Pt_0_01	Thickness	lh_parsorbitalis	0.0116395	0.0136433	32541	0.542964	0.791484
PA_Pt_0_01	Thickness	lh_rostralanteriorcingulate	0.0239543	0.0121278	32548	0.542964	1
PA_Pt_0_01	Thickness	rh_fusiform	0.0219855	-0.0122677	32532	0.542964	1
WR_Pt_0_05	Volume	Left_Pallidum	0.198281	0.00535009	32557	0.543566	1
WR_Pt_0_05	Volume	lh_medialorbitofrontal	0.219383	0.00525714	32547	0.543566	1
WR_Pt_0_05	Volume	lh_parsopercularis	0.193678	0.00626412	32498	0.543566	1
WR_Pt_0_05	Volume	lh_parsorbitalis	0.181757	0.0062545	32540	0.543566	1
WR_Pt_0_05	Volume	lh_precentral	0.225165	0.00516059	32544	0.543566	1
WR_Pt_0_05	Volume	rh_caudalmiddlefrontal	0.219014	0.00566363	32530	0.543566	1
WR_Pt_0_05	Volume	rh_paracentral	0.212032	0.00590936	32526	0.543566	1
WR_Pt_0_05	Volume	rh_parsorbitalis	0.230216	0.00557263	32539	0.543566	1
WR_Pt_0_05	Volume	rh_posteriorcingulate	0.213506	-0.00586804	32538	0.543566	1
WR_Pt_1e05	Thickness	lh_parsorbitalis	0.230265	0.00649218	32541	0.544287	1
WR_Pt_1e05	Thickness	rh_bankssts	0.232122	0.00649212	32551	0.544287	1
WR_Pt_1e05	Thickness	rh_caudalanteriorcingulate	0.218742	0.0066902	32535	0.544287	1
WR_Pt_1e05	Thickness	rh_caudalmiddlefrontal	0.211953	0.00656985	32529	0.544287	1
NREAD_Pt_0_5	Area	lh_bankssts	0.0481135	0.0095473	32486	0.545286	1
NREAD_Pt_0_5	Area	lh_frontalpole	0.0425767	-0.00953939	32542	0.545286	1
NREP_Pt_0_05	Thickness	lh_fusiform	0.344837	0.00510088	32532	0.545324	1
NREP_Pt_0_05	Thickness	lh_superiorparietal	0.331611	0.00515983	32535	0.545324	1
NREP_Pt_0_05	Thickness	rh_medialorbitofrontal	0.342203	0.0052173	32542	0.545324	1
NREP_Pt_1	Volume	lh_superiorfrontal	0.025782	0.00827785	32557	0.547868	1
DYS_Pt_0_5	Volume	rh_paracentral	0.277962	-0.00512965	32526	0.549461	1
DYS_Pt_e05	Area	lh_cuneus	0.299967	0.00499312	32533	0.550253	1
DYS_Pt_e05	Area	lh_precentral	0.286883	0.00412173	32548	0.550253	1
DYS_Pt_e05	Area	lh_transversetemporal	0.260456	-0.00545293	32495	0.550253	1
DYS_Pt_e05	Area	rh_inferiortemporal	0.294849	-0.00410013	32549	0.550253	1
DYS_Pt_e05	Area	rh_middletemporal	0.297784	-0.00390196	32540	0.550253	1
DYS_Pt_e05	Area	rh_postcentral	0.312541	0.00403037	32533	0.550253	1
DYS_Pt_e05	Area	rh_supramarginal	0.315586	0.00426886	32542	0.550253	1
DYS_Pt_e05	Area	rh_temporalpole	0.288561	-0.00500894	32539	0.550253	1
WR_Pt_0_05	Volume	Left_Hippocampus	0.240034	0.00480233	32557	0.55143	1
DYS_Pt_0_05	Volume	rh_lateralorbitofrontal	0.291305	-0.00426738	32544	0.551498	1
DYS_Pt_0_05	Volume	rh_superiorparietal	0.29197	0.00457435	32548	0.551498	1
DYS_Pt_0_001	Volume	lh_lingual	0.220805	0.00599511	32550	0.552012	1
DYS_Pt_0_1	Area	lh_insula	0.211112	-0.00510117	32541	0.552257	1
DYS_Pt_0_1	Area	lh_posteriorcingulate	0.212107	-0.00563864	32521	0.552257	1
DYS_Pt_0_1	Area	lh_precuneus	0.206105	0.00503998	32538	0.552257	1
DYS_Pt_0_1	Area	rh_caudalmiddlefrontal	0.2274	0.00551066	32530	0.552257	1
DYS_Pt_0_1	Area	rh_temporalpole	0.221695	0.00577757	32539	0.552257	1
WR_Pt_5e05	Volume	lh_parahippocampal	0.0259915	0.0117192	32532	0.552319	1
NREP_Pt_5e05	Area	lh_inferiorparietal	0.203123	-0.00559307	32535	0.552496	1
DYS_Pt_1	Thickness	lh_medialorbitofrontal	0.444506	-0.00419419	32539	0.552732	1
DYS_Pt_1	Thickness	rh_frontalpole	0.447062	-0.00416488	32539	0.552732	1
WR_Pt_0_5	Volume	lh_precuneus	0.0975612	-0.00661638	32537	0.552847	1
WR_Pt_0_5	Volume	rh_transversetemporal	0.0929432	0.0085085	32523	0.552847	1
WR_Pt_0_05	Volume	lh_isthmuscingulate	0.24735	-0.00517104	32519	0.553282	1
DYS_Pt_0_5	Thickness	rh_frontalpole	0.439483	-0.00423511	32539	0.553423	1
NREAD_Pt_5e05	Area	lh_bankssts	0.114188	-0.00760367	32486	0.554627	1
NREAD_Pt_0_5	Thickness	lh_cuneus	0.025421	-0.0122579	32557	0.554894	1
NREAD_Pt_0_5	Thickness	rh_parstriangularis	0.0230281	-0.0121009	32535	0.554894	1
NREAD_Pt_0_5	Thickness	rh_supramarginal	0.0326408	-0.0112598	32524	0.554894	1
PA_Pt_5e05	Area	lh_parsopercularis	0.0972577	-0.00803021	32479	0.555259	1
PA_Pt_5e05	Area	rh_lateralorbitofrontal	0.0979868	-0.00672069	32550	0.555259	1
NREP_Pt_0_05	Thickness	lh_precuneus	0.359459	0.00482195	32538	0.555528	1
PA_Pt_0_001	Volume	lh_postcentral	0.0654029	0.00797851	32541	0.555925	1
DYS_Pt_0_001	Thickness	rh_inferiorparietal	0.235681	-0.00617777	32522	0.557561	1
DYS_Pt_0_001	Thickness	rh_parsorbitalis	0.237783	0.00636185	32536	0.557561	1
NREP_Pt_1	Volume	lh_superiortemporal	0.0328217	0.00880765	32546	0.55797	1
DYS_Pt_0_05	Volume	rh_insula	0.301973	-0.0042087	32550	0.557994	1
PA_Pt_5e05	Volume	lh_entorhinal	0.0790283	0.00916958	32472	0.55815	1
PA_Pt_5e05	Volume	rh_postcentral	0.0853641	-0.00759663	32537	0.55815	1
PA_Pt_5e05	Volume	Right_Hippocampus	0.0775605	-0.00721953	32557	0.55815	1
DYS_Pt_5e08	Area	rh_parsopercularis	0.271814	-0.00524523	32498	0.560102	1
PA_Pt_e05	Area	lh_medialorbitofrontal	0.156762	0.00560179	32549	0.561042	1
WR_Pt_0_1	Area	rh_caudalmiddlefrontal	0.148864	0.00661215	32530	0.562374	1
SP_Pt_0_05	Area	rh_cuneus	0.173904	-0.00628971	32539	0.563117	1
DYS_Pt_0_05	Area	rh_inferiorparietal	0.140879	-0.00620737	32541	0.563515	1
WR_Pt_0_05	Area	lh_pericalcarine	0.0911616	-0.0087259	32544	0.563545	1
NREAD_Pt_0_001	Thickness	lh_parsorbitalis	0.0320783	0.0115951	32541	0.564234	1
NREAD_Pt_0_001	Thickness	lh_parstriangularis	0.0414878	0.0108326	32539	0.564234	1
NREAD_Pt_0_001	Thickness	rh_superiortemporal	0.0352229	0.0108952	32549	0.564234	1
DYS_Pt_0_05	Thickness	lh_temporalpole	0.440113	-0.00423708	32527	0.564674	1
DYS_Pt_0_05	Thickness	rh_lingual	0.434533	-0.00424638	32554	0.564674	1
DYS_Pt_5e05	Thickness	lh_parsorbitalis	0.0126349	0.0134997	32541	0.564752	0.859174
DYS_Pt_5e05	Thickness	lh_entorhinal	0.0558503	-0.0104641	32468	0.564752	1
DYS_Pt_5e05	Thickness	lh_fusiform	0.0543858	-0.0103781	32532	0.564752	1
DYS_Pt_5e05	Thickness	lh_rostralmiddlefrontal	0.0447645	0.0104696	32533	0.564752	1
DYS_Pt_5e05	Thickness	rh_fusiform	0.0520248	-0.0104159	32532	0.564752	1
DYS_Pt_5e05	Thickness	rh_parsorbitalis	0.0540004	0.0103861	32536	0.564752	1
DYS_Pt_5e05	Thickness	rh_pericalcarine	0.0664414	-0.0100401	32554	0.564752	1
DYS_Pt_5e05	Thickness	rh_posteriorcingulate	0.0601087	-0.0102224	32530	0.564752	1
WR_Pt_0_01	Area	lh_insula	0.0581394	0.00772673	32541	0.564783	1
WR_Pt_0_01	Area	lh_supramarginal	0.0487175	-0.00837826	32533	0.564783	1
WR_Pt_0_01	Area	rh_lateralorbitofrontal	0.055114	0.00780605	32550	0.564783	1
DYS_Pt_5e08	Thickness	lh_pericalcarine	0.132937	-0.00818212	32551	0.564981	1
DYS_Pt_5e08	Thickness	lh_inferiorparietal	0.162576	0.00734957	32518	0.565509	1
DYS_Pt_5e08	Thickness	rh_isthmuscingulate	0.156311	-0.00765786	32536	0.565509	1
DYS_Pt_5e08	Thickness	rh_rostralmiddlefrontal	0.166326	0.0073048	32532	0.565509	1
DYS_Pt_5e08	Thickness	rh_transversetemporal	0.161806	-0.00774817	32553	0.565509	1
WR_Pt_0_5	Volume	lh_precentral	0.106469	0.00689137	32544	0.565617	1
DYS_Pt_0_001	Area	lh_cuneus	0.141521	0.00707869	32533	0.566082	1
DYS_Pt_0_1	Volume	lh_temporalpole	0.33341	-0.00506635	32538	0.566798	1
PA_Pt_1	Thickness	lh_caudalanteriorcingulate	0.0474159	0.0107311	32554	0.5675	1
PA_Pt_1	Thickness	rh_inferiorparietal	0.0441879	-0.0104839	32522	0.5675	1
PA_Pt_1	Thickness	rh_parstriangularis	0.0500736	-0.0104032	32535	0.5675	1
PA_Pt_1	Thickness	rh_superiorfrontal	0.0403063	-0.0104466	32532	0.5675	1
WR_Pt_1e05	Volume	rh_inferiortemporal	0.26047	0.00459471	32544	0.567691	1
DYS_Pt_0_5	Thickness	lh_parahippocampal	0.459366	0.00402535	32554	0.567943	1
DYS_Pt_0_05	Thickness	lh_inferiortemporal	0.451346	-0.0041184	32546	0.568362	1
DYS_Pt_1	Volume	rh_fusiform	0.314309	-0.00420192	32548	0.568431	1
DYS_Pt_e05	Volume	lh_entorhinal	0.113743	-0.00826225	32472	0.568714	1
NREAD_Pt_1	Volume	Brain_Stem	0.140551	0.00537059	32557	0.568895	1
WR_Pt_1	Volume	lh_inferiorparietal	0.0736384	0.00801413	32544	0.569024	1
DYS_Pt_0_5	Volume	lh_parstriangularis	0.302604	-0.00494026	32535	0.569759	1
DYS_Pt_0_5	Volume	rh_caudalmiddlefrontal	0.314393	0.00462912	32530	0.569759	1
DYS_Pt_0_5	Volume	rh_fusiform	0.304079	-0.00429215	32548	0.569759	1
DYS_Pt_0_5	Volume	rh_middletemporal	0.315043	-0.00398467	32550	0.569759	1
DYS_Pt_0_1	Volume	lh_caudalanteriorcingulate	0.347551	-0.00502805	32537	0.569892	1
DYS_Pt_0_1	Volume	rh_lingual	0.34864	0.0046286	32550	0.569892	1
DYS_Pt_5e08	Thickness	rh_frontalpole	0.176283	0.00738887	32539	0.570822	1
PA_Pt_0_5	Volume	rh_parsopercularis	0.0403588	-0.00980539	32515	0.571749	1
NREAD_Pt_0_001	Volume	Right_VentralDC	0.0740445	0.00619934	32557	0.572162	1
WR_Pt_0_1	Volume	rh_cuneus	0.242449	0.00570651	32526	0.572449	1
WR_Pt_0_5	Volume	Brain_Stem	0.141801	0.00537652	32557	0.573956	1
WR_Pt_0_5	Volume	lh_temporalpole	0.140978	0.00774836	32538	0.573956	1
WR_Pt_0_5	Volume	rh_bankssts	0.134498	0.00737422	32530	0.573956	1
WR_Pt_0_5	Volume	rh_caudalmiddlefrontal	0.132476	0.00695525	32530	0.573956	1
WR_Pt_0_5	Volume	rh_insula	0.115427	0.00645135	32550	0.573956	1
DYS_Pt_0_1	Thickness	lh_caudalmiddlefrontal	0.45427	-0.00394316	32528	0.574362	1
DYS_Pt_0_1	Thickness	lh_entorhinal	0.426198	-0.00436309	32468	0.574362	1
DYS_Pt_0_1	Thickness	lh_inferiortemporal	0.477752	-0.00388264	32546	0.574362	1
DYS_Pt_0_1	Thickness	lh_posteriorcingulate	0.486572	-0.00381332	32545	0.574362	1
DYS_Pt_0_1	Thickness	lh_rostralanteriorcingulate	0.467161	-0.003917	32548	0.574362	1
DYS_Pt_0_1	Thickness	lh_superiorparietal	0.467199	-0.00386792	32535	0.574362	1
DYS_Pt_0_1	Thickness	rh_caudalanteriorcingulate	0.444937	0.00416459	32535	0.574362	1
DYS_Pt_0_1	Thickness	rh_lingual	0.489897	-0.0037527	32554	0.574362	1
DYS_Pt_0_1	Thickness	rh_superiorparietal	0.43224	-0.00415632	32541	0.574362	1
PA_Pt_0_5	Thickness	rh_caudalmiddlefrontal	0.0154058	-0.0127519	32529	0.57547	1
PA_Pt_0_5	Thickness	rh_precentral	0.0169256	-0.0125664	32525	0.57547	1
WR_Pt_1e05	Thickness	lh_isthmuscingulate	0.26689	0.00602475	32545	0.575473	1
WR_Pt_1e05	Thickness	lh_middletemporal	0.276846	0.00585299	32541	0.575473	1
WR_Pt_1e05	Thickness	rh_inferiorparietal	0.261038	0.00585506	32522	0.575473	1
WR_Pt_1e05	Thickness	rh_pericalcarine	0.279274	0.00591668	32554	0.575473	1
NREAD_Pt_0_001	Volume	lh_rostralmiddlefrontal	0.0881575	-0.00636187	32545	0.576414	1
NREAD_Pt_0_001	Volume	rh_precentral	0.0845394	0.00739463	32551	0.576414	1
WR_Pt_0_05	Volume	lh_inferiortemporal	0.264744	0.00468826	32539	0.577006	1
DYS_Pt_0_001	Area	lh_caudalanteriorcingulate	0.170022	-0.00689879	32483	0.577764	1
DYS_Pt_0_001	Area	rh_isthmuscingulate	0.177088	0.00583177	32527	0.577764	1
DYS_Pt_0_001	Area	rh_pericalcarine	0.178427	0.00684585	32545	0.577764	1
DYS_Pt_0_001	Area	rh_posteriorcingulate	0.168186	-0.0061145	32530	0.577764	1
SP_Pt_0_05	Area	lh_entorhinal	0.201007	0.0065459	32528	0.579395	1
SP_Pt_0_05	Area	rh_bankssts	0.204492	0.00606502	32522	0.579395	1
SP_Pt_0_05	Area	rh_rostralmiddlefrontal	0.196324	0.00484917	32542	0.579395	1
NREAD_Pt_0_001	Thickness	lh_lateraloccipital	0.0511946	0.0105733	32551	0.580206	1
DYS_Pt_0_05	Thickness	lh_rostralanteriorcingulate	0.469294	-0.00389752	32548	0.580218	1
PA_Pt_e05	Volume	rh_isthmuscingulate	0.0682942	0.00841932	32530	0.580501	1
WR_Pt_0_1	Volume	lh_caudalanteriorcingulate	0.262547	0.00601708	32537	0.581159	1
WR_Pt_0_1	Volume	lh_parsopercularis	0.266649	0.00536311	32498	0.581159	1
WR_Pt_0_1	Volume	lh_temporalpole	0.261371	0.00590236	32538	0.581159	1
SP_Pt_0_5	Volume	Brain_Stem	0.0581044	0.00689695	32557	0.58129	1
SP_Pt_0_5	Volume	Left_Caudate	0.0680323	-0.00862858	32557	0.58129	1
SP_Pt_0_5	Volume	Left_VentralDC	0.0383203	0.00718582	32557	0.58129	1
SP_Pt_0_5	Volume	lh_postcentral	0.0502023	0.00849782	32541	0.58129	1
SP_Pt_0_5	Volume	lh_supramarginal	0.0728368	-0.00771473	32540	0.58129	1
SP_Pt_0_5	Volume	rh_lateraloccipital	0.061623	0.00790364	32548	0.58129	1
SP_Pt_0_5	Volume	rh_precentral	0.058249	0.00813475	32551	0.58129	1
SP_Pt_0_5	Volume	Right_Caudate	0.049947	-0.00910882	32557	0.58129	1
SP_Pt_0_5	Volume	Right_Thalamus_Proper	0.0752257	0.00599277	32557	0.58129	1
SP_Pt_0_5	Volume	Right_VentralDC	0.0624812	0.00647779	32557	0.58129	1
DYS_Pt_0_1	Volume	rh_rostralmiddlefrontal	0.36248	-0.0034928	32543	0.581336	1
NREAD_Pt_1	Volume	Left_Accumbens_area	0.150518	-0.00626478	32557	0.581547	1
DYS_Pt_1	Volume	lh_parstriangularis	0.336633	-0.00460421	32535	0.581861	1
DYS_Pt_1	Volume	lh_posteriorcingulate	0.342271	-0.0045235	32534	0.581861	1
DYS_Pt_1	Volume	rh_inferiortemporal	0.330497	-0.00398243	32544	0.581861	1
DYS_Pt_0_001	Thickness	lh_frontalpole	0.281144	-0.00588838	32525	0.582354	1
DYS_Pt_0_001	Thickness	lh_inferiorparietal	0.303872	-0.00541312	32518	0.582354	1
DYS_Pt_0_001	Thickness	lh_inferiortemporal	0.351125	-0.00508825	32546	0.582354	1
DYS_Pt_0_001	Thickness	lh_insula	0.344649	-0.00515963	32554	0.582354	1
DYS_Pt_0_001	Thickness	lh_parahippocampal	0.339289	0.00518677	32554	0.582354	1
DYS_Pt_0_001	Thickness	lh_parstriangularis	0.316755	0.00532205	32539	0.582354	1
DYS_Pt_0_001	Thickness	lh_precuneus	0.323908	-0.0051847	32538	0.582354	1
DYS_Pt_0_001	Thickness	lh_rostralmiddlefrontal	0.332617	0.0050532	32533	0.582354	1
DYS_Pt_0_001	Thickness	lh_superiortemporal	0.312943	-0.00528381	32549	0.582354	1
DYS_Pt_0_001	Thickness	rh_parsopercularis	0.295769	-0.00558177	32527	0.582354	1
DYS_Pt_0_001	Thickness	rh_superiorfrontal	0.296903	-0.00531364	32532	0.582354	1
DYS_Pt_0_001	Thickness	rh_transversetemporal	0.26031	-0.00623623	32553	0.582354	1
DYS_Pt_1	Volume	rh_superiorfrontal	0.349651	-0.00348978	32542	0.582751	1
DYS_Pt_1	Area	lh_fusiform	0.224073	-0.00479605	32544	0.586038	1
DYS_Pt_1	Area	lh_rostralmiddlefrontal	0.209499	0.00463922	32547	0.586038	1
DYS_Pt_1	Area	rh_frontalpole	0.217996	0.00581087	32552	0.586038	1
DYS_Pt_1	Area	rh_precuneus	0.200697	0.00497438	32533	0.586038	1
PA_Pt_0_01	Area	rh_temporalpole	0.00862101	0.0123823	32539	0.586229	0.586229
WR_Pt_0_01	Area	lh_postcentral	0.068974	0.00704083	32535	0.586279	1
SP_Pt_0_1	Area	lh_entorhinal	0.0863367	0.0087885	32528	0.587089	1
SP_Pt_0_1	Area	lh_precentral	0.0835791	0.00670114	32548	0.587089	1
DYS_Pt_0_1	Volume	Left_Caudate	0.383547	0.00412281	32557	0.587178	1
DYS_Pt_0_1	Volume	rh_cuneus	0.386847	-0.0042107	32526	0.587178	1
DYS_Pt_0_1	Volume	rh_posteriorcingulate	0.385028	-0.00409134	32538	0.587178	1
DYS_Pt_0_1	Volume	lh_parstriangularis	0.396393	-0.00406374	32535	0.58718	1
DYS_Pt_0_1	Volume	rh_supramarginal	0.400664	-0.0036562	32544	0.58718	1
WR_Pt_1e05	Thickness	lh_entorhinal	0.302398	-0.00564206	32468	0.587517	1
WR_Pt_1e05	Thickness	lh_posteriorcingulate	0.298819	0.00568156	32545	0.587517	1
DYS_Pt_5e05	Area	lh_superiorparietal	0.225221	0.00531746	32546	0.587643	1
DYS_Pt_5e05	Area	rh_paracentral	0.233329	-0.00524936	32530	0.587643	1
DYS_Pt_1	Volume	lh_isthmuscingulate	0.36004	-0.00408552	32519	0.588528	1
WR_Pt_1e05	Thickness	rh_inferiortemporal	0.330322	0.00529908	32541	0.589625	1
WR_Pt_1e05	Thickness	rh_insula	0.324635	-0.00538213	32551	0.589625	1
WR_Pt_1e05	Thickness	rh_postcentral	0.331851	0.00517566	32553	0.589625	1
WR_Pt_1e05	Thickness	rh_supramarginal	0.338167	0.00503396	32524	0.589625	1
DYS_Pt_0_05	Area	lh_parsorbitalis	0.173525	0.00586285	32545	0.589984	1
DYS_Pt_0_05	Area	lh_rostralanteriorcingulate	0.171541	-0.00598828	32533	0.589984	1
DYS_Pt_0_05	Area	lh_superiortemporal	0.16276	-0.00536536	32544	0.589984	1
DYS_Pt_0_5	Volume	rh_parahippocampal	0.333608	-0.00507114	32518	0.590764	1
NREP_Pt_e05	Area	lh_bankssts	0.0974273	-0.00801929	32486	0.591072	1
NREP_Pt_e05	Area	lh_entorhinal	0.0857372	0.00883313	32528	0.591072	1
NREP_Pt_e05	Area	lh_frontalpole	0.108256	0.00756709	32542	0.591072	1
NREP_Pt_e05	Area	lh_inferiorparietal	0.117356	-0.00691003	32535	0.591072	1
NREP_Pt_e05	Area	lh_medialorbitofrontal	0.0883537	0.00677436	32549	0.591072	1
NREP_Pt_e05	Area	lh_parsorbitalis	0.130384	0.00653124	32545	0.591072	1
NREP_Pt_e05	Area	lh_parstriangularis	0.113462	0.0075183	32536	0.591072	1
NREP_Pt_e05	Area	lh_precentral	0.121953	0.00600882	32548	0.591072	1
NREP_Pt_e05	Area	rh_entorhinal	0.0786419	0.00895027	32519	0.591072	1
NREP_Pt_e05	Area	rh_medialorbitofrontal	0.0633171	0.00696348	32555	0.591072	1
NREP_Pt_e05	Area	rh_superiortemporal	0.0934057	0.00642368	32540	0.591072	1
NREAD_Pt_0_1	Area	rh_paracentral	0.0261077	-0.00981541	32530	0.591774	1
WR_Pt_0_05	Volume	lh_precuneus	0.284016	-0.00426412	32537	0.591971	1
WR_Pt_0_05	Volume	rh_inferiortemporal	0.285539	0.00437701	32544	0.591971	1
DYS_Pt_0_1	Thickness	lh_bankssts	0.513627	-0.00357225	32545	0.591977	1
SP_Pt_0_1	Thickness	rh_lateraloccipital	0.0401912	0.0110769	32551	0.592678	1
SP_Pt_0_1	Thickness	rh_paracentral	0.0435793	0.0107625	32548	0.592678	1
WR_Pt_0_01	Volume	rh_superiortemporal	0.118558	0.00637142	32544	0.592791	1
DYS_Pt_5e05	Area	rh_caudalmiddlefrontal	0.252371	0.00521556	32530	0.593707	1
DYS_Pt_5e05	Area	rh_posteriorcingulate	0.253198	-0.00507117	32530	0.593707	1
WR_Pt_1	Area	rh_frontalpole	0.0316187	0.0101909	32552	0.593948	1
WR_Pt_1	Area	rh_paracentral	0.0181831	-0.0104777	32530	0.593948	1
WR_Pt_1	Area	rh_posteriorcingulate	0.0317844	-0.00959802	32530	0.593948	1
WR_Pt_1	Area	rh_superiortemporal	0.0349381	0.00810041	32540	0.593948	1
DYS_Pt_0_001	Thickness	rh_caudalmiddlefrontal	0.367023	-0.0047482	32529	0.594228	1
DYS_Pt_e05	Area	lh_entorhinal	0.349781	-0.00478804	32528	0.594628	1
SP_Pt_0_05	Area	lh_cuneus	0.257717	-0.00545054	32533	0.595843	1
SP_Pt_0_05	Area	lh_postcentral	0.251542	0.00443114	32535	0.595843	1
SP_Pt_0_05	Area	lh_superiorfrontal	0.271634	0.00393625	32546	0.595843	1
SP_Pt_0_05	Area	rh_caudalmiddlefrontal	0.267135	0.00505598	32530	0.595843	1
SP_Pt_0_05	Area	rh_frontalpole	0.268864	0.00520501	32552	0.595843	1
SP_Pt_0_05	Area	rh_lateralorbitofrontal	0.22101	0.00497214	32550	0.595843	1
SP_Pt_0_05	Area	rh_precentral	0.240844	0.00457924	32539	0.595843	1
SP_Pt_0_1	Area	lh_bankssts	0.109257	0.00772448	32486	0.597232	1
SP_Pt_0_1	Area	rh_cuneus	0.121705	-0.00716601	32539	0.597232	1
SP_Pt_0_1	Area	rh_pericalcarine	0.122667	-0.00786265	32545	0.597232	1
SP_Pt_0_1	Area	rh_precentral	0.122959	0.00602821	32539	0.597232	1
WR_Pt_1e05	Volume	Left_Thalamus_Proper	0.291778	0.00360224	32557	0.597625	1
WR_Pt_1e05	Volume	lh_temporalpole	0.295297	-0.00546949	32538	0.597625	1
WR_Pt_1e05	Volume	rh_supramarginal	0.287344	-0.00461826	32544	0.597625	1
NREAD_Pt_0_05	Volume	lh_parsorbitalis	0.0421893	0.00948949	32540	0.597681	1
DYS_Pt_5e05	Area	lh_superiortemporal	0.272704	-0.00420886	32544	0.598189	1
DYS_Pt_5e05	Area	rh_caudalanteriorcingulate	0.26525	-0.00561085	32494	0.598189	1
PA_Pt_5e05	Area	rh_superiortemporal	0.114502	-0.00601622	32540	0.598935	1
SP_Pt_0_05	Area	lh_middletemporal	0.289811	0.00413301	32547	0.598967	1
SP_Pt_0_05	Area	rh_inferiorparietal	0.290675	0.00444627	32541	0.598967	1
PA_Pt_1	Thickness	lh_caudalmiddlefrontal	0.066094	-0.0096637	32528	0.599055	1
PA_Pt_1	Thickness	lh_posteriorcingulate	0.0783651	0.00962701	32545	0.599055	1
PA_Pt_1	Thickness	rh_supramarginal	0.0792867	-0.00922427	32524	0.599055	1
SP_Pt_0_1	Area	rh_middletemporal	0.132448	0.00564211	32540	0.600433	1
WR_Pt_0_01	Area	rh_insula	0.0795686	0.00720646	32554	0.601185	1
NREP_Pt_0_05	Thickness	rh_temporalpole	0.398073	-0.00464305	32526	0.601533	1
NREP_Pt_1	Area	rh_superiortemporal	0.0117433	0.00963414	32540	0.601887	0.798542
NREP_Pt_1	Area	rh_medialorbitofrontal	0.0177026	0.00888152	32555	0.601887	1
DYS_Pt_0_1	Area	lh_parstriangularis	0.25669	-0.00537604	32536	0.601893	1
PA_Pt_1	Area	lh_fusiform	0.205649	-0.00498213	32544	0.602482	1
PA_Pt_1	Area	lh_inferiorparietal	0.0375112	0.00914014	32535	0.602482	1
PA_Pt_1	Area	lh_inferiortemporal	0.168628	0.00559871	32541	0.602482	1
PA_Pt_1	Area	lh_lateraloccipital	0.209802	0.00533787	32544	0.602482	1
PA_Pt_1	Area	lh_parahippocampal	0.210495	-0.00584293	32517	0.602482	1
PA_Pt_1	Area	lh_parsopercularis	0.212641	-0.00603657	32479	0.602482	1
PA_Pt_1	Area	lh_posteriorcingulate	0.192588	-0.00587538	32521	0.602482	1
PA_Pt_1	Area	lh_precentral	0.050773	-0.00755695	32548	0.602482	1
PA_Pt_1	Area	lh_superiortemporal	0.148174	0.00554758	32544	0.602482	1
PA_Pt_1	Area	lh_supramarginal	0.0692108	-0.00770905	32533	0.602482	1
PA_Pt_1	Area	rh_bankssts	0.102337	0.00780804	32522	0.602482	1
PA_Pt_1	Area	rh_caudalmiddlefrontal	0.183844	-0.00605475	32530	0.602482	1
PA_Pt_1	Area	rh_frontalpole	0.0804903	0.00822716	32552	0.602482	1
PA_Pt_1	Area	rh_inferiorparietal	0.137088	0.00625544	32541	0.602482	1
PA_Pt_1	Area	rh_lateraloccipital	0.169357	0.00583631	32551	0.602482	1
PA_Pt_1	Area	rh_medialorbitofrontal	0.152084	0.0053481	32555	0.602482	1
PA_Pt_1	Area	rh_middletemporal	0.142167	0.00549838	32540	0.602482	1
PA_Pt_1	Area	rh_parsopercularis	0.0542887	-0.00918936	32498	0.602482	1
PA_Pt_1	Area	rh_parstriangularis	0.121808	-0.00730235	32525	0.602482	1
PA_Pt_1	Area	rh_rostralmiddlefrontal	0.178051	0.00505405	32542	0.602482	1
PA_Pt_1	Area	rh_superiortemporal	0.17711	0.005146	32540	0.602482	1
PA_Pt_1	Area	rh_supramarginal	0.0931966	-0.00713791	32542	0.602482	1
PA_Pt_1	Area	rh_temporalpole	0.127623	0.00718786	32539	0.602482	1
WR_Pt_0_5	Thickness	lh_parahippocampal	0.0496169	0.0107316	32554	0.60268	1
WR_Pt_0_5	Thickness	lh_postcentral	0.0447068	0.0107712	32550	0.60268	1
WR_Pt_0_5	Thickness	rh_paracentral	0.0531776	0.0103722	32548	0.60268	1
WR_Pt_0_5	Thickness	rh_postcentral	0.0178678	0.0127214	32553	0.60268	1
WR_Pt_0_5	Thickness	rh_transversetemporal	0.029636	0.0121343	32553	0.60268	1
WR_Pt_1e05	Volume	Left_Agdala	0.311508	0.00419912	32557	0.602808	1
WR_Pt_1e05	Volume	rh_insula	0.312042	0.00411364	32550	0.602808	1
PA_Pt_0_5	Thickness	lh_caudalanteriorcingulate	0.0620574	0.0100989	32554	0.602844	1
PA_Pt_0_5	Thickness	lh_caudalmiddlefrontal	0.0580443	-0.00996582	32528	0.602844	1
PA_Pt_0_5	Thickness	lh_posteriorcingulate	0.0617586	0.0102158	32545	0.602844	1
PA_Pt_0_5	Thickness	rh_inferiorparietal	0.0500339	-0.0102091	32522	0.602844	1
PA_Pt_0_5	Thickness	rh_parstriangularis	0.0418529	-0.0108042	32535	0.602844	1
DYS_Pt_0_01	Volume	lh_temporalpole	0.362512	-0.0047632	32538	0.604187	1
NREAD_Pt_0_05	Volume	rh_lateraloccipital	0.049764	0.00829145	32548	0.604277	1
WR_Pt_0_5	Volume	lh_lateraloccipital	0.156565	0.00607798	32538	0.604909	1
NREAD_Pt_0_5	Volume	lh_bankssts	0.122675	0.00754245	32491	0.605435	1
NREAD_Pt_0_5	Volume	lh_caudalanteriorcingulate	0.134095	0.00802381	32537	0.605435	1
NREAD_Pt_0_5	Volume	lh_parsopercularis	0.135403	-0.00718955	32498	0.605435	1
NREAD_Pt_0_5	Volume	lh_supramarginal	0.129667	-0.00652493	32540	0.605435	1
NREAD_Pt_0_5	Volume	rh_rostralanteriorcingulate	0.142455	-0.00731879	32552	0.605435	1
PA_Pt_0_01	Volume	Left_Putamen	0.0288818	-0.00919848	32557	0.605898	1
PA_Pt_0_01	Volume	lh_medialorbitofrontal	0.0169359	0.0101768	32547	0.605898	1
PA_Pt_0_01	Volume	rh_frontalpole	0.0311746	0.0112141	32501	0.605898	1
PA_Pt_0_01	Volume	Right_Hippocampus	0.0168677	-0.00976807	32557	0.605898	1
PA_Pt_0_01	Volume	Right_Putamen	0.0356411	-0.00891856	32557	0.605898	1
DYS_Pt_0_1	Area	rh_parahippocampal	0.267729	-0.00514588	32520	0.606852	1
DYS_Pt_5e08	Area	rh_precentral	0.303813	0.00401286	32539	0.607627	1
WR_Pt_1e05	Area	lh_inferiorparietal	0.340052	0.00419168	32535	0.608514	1
WR_Pt_1e05	Area	lh_middletemporal	0.334113	0.00377037	32547	0.608514	1
WR_Pt_1e05	Area	rh_paracentral	0.329048	-0.00429764	32530	0.608514	1
DYS_Pt_5e08	Volume	Right_Accumbens_area	0.179232	0.00592972	32557	0.60939	1
SP_Pt_0_01	Area	lh_bankssts	0.123605	0.00741593	32486	0.609987	1
SP_Pt_0_01	Area	lh_caudalanteriorcingulate	0.161467	0.00703773	32483	0.609987	1
SP_Pt_0_01	Area	lh_middletemporal	0.153691	0.00556757	32547	0.609987	1
SP_Pt_0_01	Area	lh_pericalcarine	0.154853	-0.00731886	32544	0.609987	1
SP_Pt_0_01	Area	rh_insula	0.120875	0.00636152	32554	0.609987	1
SP_Pt_0_01	Area	rh_postcentral	0.131004	0.0060222	32533	0.609987	1
SP_Pt_0_01	Area	rh_precuneus	0.147455	0.00561726	32533	0.609987	1
DYS_Pt_0_01	Area	rh_superiorparietal	0.141733	0.00627931	32542	0.61074	1
DYS_Pt_0_01	Area	rh_superiortemporal	0.143704	-0.00557899	32540	0.61074	1
SP_Pt_0_1	Volume	lh_medialorbitofrontal	0.172556	0.00582389	32547	0.611135	1
SP_Pt_0_1	Volume	lh_insula	0.201353	0.00530594	32549	0.61125	1
SP_Pt_0_1	Volume	lh_paracentral	0.198574	0.00606257	32530	0.61125	1
SP_Pt_0_1	Volume	rh_paracentral	0.198099	0.00607843	32526	0.61125	1
SP_Pt_0_1	Volume	rh_parsopercularis	0.196602	0.00618343	32515	0.61125	1
DYS_Pt_0_05	Area	lh_fusiform	0.194003	-0.00512263	32544	0.61216	1
DYS_Pt_0_05	Area	lh_parsopercularis	0.198052	0.00624593	32479	0.61216	1
NREAD_Pt_1	Area	rh_medialorbitofrontal	0.063099	0.00695877	32555	0.612961	1
DYS_Pt_5e08	Area	rh_rostralmiddlefrontal	0.316052	-0.00376096	32542	0.614044	1
DYS_Pt_0_01	Volume	lh_parstriangularis	0.37579	-0.00423841	32535	0.614271	1
WR_Pt_0_5	Volume	rh_parsorbitalis	0.166388	0.00644933	32539	0.614912	1
DYS_Pt_0_05	Thickness	rh_temporalpole	0.507064	-0.00364804	32526	0.61572	1
DYS_Pt_0_01	Thickness	rh_pericalcarine	0.498058	-0.00370862	32554	0.61578	1
DYS_Pt_0_01	Area	lh_frontalpole	0.154093	0.00669189	32542	0.61637	1
NREAD_Pt_1	Thickness	lh_entorhinal	0.0634718	-0.0101818	32468	0.616584	1
NREAD_Pt_1	Thickness	rh_bankssts	0.0544825	-0.0104774	32551	0.616584	1
NREAD_Pt_1	Volume	rh_lingual	0.18084	-0.00661283	32550	0.617299	1
NREAD_Pt_1	Volume	rh_precentral	0.181559	-0.00574566	32551	0.617299	1
NREAD_Pt_1	Volume	Right_VentralDC	0.16805	0.00479936	32557	0.617299	1
NREP_Pt_e05	Area	lh_postcentral	0.146787	0.0056309	32535	0.617779	1
NREP_Pt_e05	Area	rh_temporalpole	0.154445	0.00674677	32539	0.617779	1
WR_Pt_0_1	Volume	Brain_Stem	0.291145	0.00385723	32557	0.618404	1
WR_Pt_0_1	Volume	Left_Pallidum	0.312839	0.00420489	32557	0.618404	1
WR_Pt_0_1	Volume	lh_transversetemporal	0.308277	0.00517637	32524	0.618404	1
WR_Pt_0_1	Volume	rh_parahippocampal	0.30216	0.00542896	32518	0.618404	1
PA_Pt_5e05	Area	rh_entorhinal	0.127431	0.00772384	32519	0.618949	1
NREAD_Pt_0_1	Area	lh_parstriangularis	0.0456642	-0.00947091	32536	0.621033	1
NREAD_Pt_0_1	Area	rh_superiortemporal	0.0444125	0.00767889	32540	0.621033	1
SP_Pt_0_05	Volume	Left_Caudate	0.224282	-0.00573804	32557	0.621573	1
SP_Pt_0_05	Volume	Left_VentralDC	0.234004	0.0041227	32557	0.621573	1
SP_Pt_0_05	Volume	rh_superiortemporal	0.230479	0.00488615	32544	0.621573	1
SP_Pt_0_05	Volume	Right_Accumbens_area	0.219044	0.00542882	32557	0.621573	1
PA_Pt_0_5	Thickness	lh_medialorbitofrontal	0.0823303	0.00950908	32539	0.622051	1
PA_Pt_0_5	Thickness	rh_superiorfrontal	0.080451	-0.00890496	32532	0.622051	1
DYS_Pt_0_5	Volume	lh_entorhinal	0.370864	0.00468326	32472	0.622364	1
DYS_Pt_0_5	Volume	lh_isthmuscingulate	0.362859	-0.004062	32519	0.622364	1
DYS_Pt_0_5	Volume	lh_posteriorcingulate	0.373418	-0.00424004	32534	0.622364	1
DYS_Pt_0_001	Area	lh_caudalmiddlefrontal	0.236936	-0.00532318	32527	0.622529	1
DYS_Pt_0_001	Area	lh_fusiform	0.238026	-0.00464451	32544	0.622529	1
DYS_Pt_0_001	Area	lh_precentral	0.225675	0.00468684	32548	0.622529	1
DYS_Pt_0_001	Area	lh_superiorfrontal	0.230476	-0.00429299	32546	0.622529	1
DYS_Pt_0_001	Area	rh_parsopercularis	0.201507	-0.00609862	32498	0.622529	1
DYS_Pt_0_1	Thickness	rh_parsorbitalis	0.550353	-0.00322545	32536	0.623733	1
PA_Pt_0_5	Volume	Left_Hippocampus	0.191188	0.00532292	32557	0.623738	1
PA_Pt_0_5	Volume	Left_Pallidum	0.232472	0.00494737	32557	0.623738	1
PA_Pt_0_5	Volume	Left_Putamen	0.186883	-0.00556036	32557	0.623738	1
PA_Pt_0_5	Volume	Left_Thalamus_Proper	0.155028	0.00485921	32557	0.623738	1
PA_Pt_0_5	Volume	lh_caudalmiddlefrontal	0.206219	-0.005753	32534	0.623738	1
PA_Pt_0_5	Volume	lh_entorhinal	0.245367	0.00606588	32472	0.623738	1
PA_Pt_0_5	Volume	lh_inferiorparietal	0.112963	0.00704849	32544	0.623738	1
PA_Pt_0_5	Volume	lh_lateraloccipital	0.184795	0.0056495	32538	0.623738	1
PA_Pt_0_5	Volume	lh_lingual	0.248158	0.00565463	32550	0.623738	1
PA_Pt_0_5	Volume	lh_medialorbitofrontal	0.223344	0.00519313	32547	0.623738	1
PA_Pt_0_5	Volume	lh_parsopercularis	0.194855	-0.00622485	32498	0.623738	1
PA_Pt_0_5	Volume	lh_parsorbitalis	0.213303	0.00580767	32540	0.623738	1
PA_Pt_0_5	Volume	lh_parstriangularis	0.224734	-0.00580485	32535	0.623738	1
PA_Pt_0_5	Volume	lh_precentral	0.0764089	-0.00751132	32544	0.623738	1
PA_Pt_0_5	Volume	lh_superiortemporal	0.115971	0.00646838	32546	0.623738	1
PA_Pt_0_5	Volume	rh_bankssts	0.226764	0.00591406	32530	0.623738	1
PA_Pt_0_5	Volume	rh_caudalmiddlefrontal	0.0788365	-0.00806834	32530	0.623738	1
PA_Pt_0_5	Volume	rh_entorhinal	0.234161	0.0062603	32477	0.623738	1
PA_Pt_0_5	Volume	rh_inferiortemporal	0.253599	-0.00466188	32544	0.623738	1
PA_Pt_0_5	Volume	rh_paracentral	0.1911	-0.00616739	32526	0.623738	1
PA_Pt_0_5	Volume	rh_postcentral	0.211627	-0.00551641	32537	0.623738	1
PA_Pt_0_5	Volume	rh_rostralanteriorcingulate	0.107807	-0.00800243	32552	0.623738	1
PA_Pt_0_5	Volume	rh_superiorfrontal	0.234102	-0.00443012	32542	0.623738	1
PA_Pt_0_5	Volume	rh_superiorparietal	0.197969	-0.00557714	32548	0.623738	1
PA_Pt_0_5	Volume	rh_superiortemporal	0.256833	0.00461979	32544	0.623738	1
PA_Pt_0_5	Volume	Right_Agdala	0.207294	0.00501008	32557	0.623738	1
PA_Pt_0_5	Volume	Right_Caudate	0.216999	-0.00572725	32557	0.623738	1
PA_Pt_0_5	Volume	Right_Pallidum	0.0539422	0.0078394	32557	0.623738	1
PA_Pt_0_5	Volume	Right_Putamen	0.111728	-0.00675651	32557	0.623738	1
DYS_Pt_0_5	Area	lh_fusiform	0.230423	-0.00473145	32544	0.624376	1
DYS_Pt_0_5	Area	lh_insula	0.243777	-0.00475542	32541	0.624376	1
DYS_Pt_0_5	Area	lh_lateralorbitofrontal	0.247914	0.0043063	32548	0.624376	1
DYS_Pt_0_5	Area	rh_frontalpole	0.247063	0.00546065	32552	0.624376	1
SP_Pt_0_1	Area	rh_parstriangularis	0.147009	0.00685164	32525	0.624788	1
DYS_Pt_0_01	Volume	rh_cuneus	0.396933	-0.00411658	32526	0.624802	1
DYS_Pt_0_01	Volume	rh_entorhinal	0.396371	0.00446647	32477	0.624802	1
PA_Pt_0_01	Volume	Left_Pallidum	0.110384	0.00660999	32557	0.625508	1
PA_Pt_0_01	Volume	lh_entorhinal	0.0715084	0.00940355	32472	0.625508	1
PA_Pt_0_01	Volume	lh_frontalpole	0.0961587	0.00856997	32523	0.625508	1
PA_Pt_0_01	Volume	lh_lingual	0.108911	0.00784375	32550	0.625508	1
PA_Pt_0_01	Volume	lh_parsorbitalis	0.106692	0.00752267	32540	0.625508	1
PA_Pt_0_01	Volume	lh_superiorparietal	0.10611	0.00706743	32548	0.625508	1
PA_Pt_0_01	Volume	rh_parsopercularis	0.0721643	-0.00859404	32515	0.625508	1
PA_Pt_0_01	Volume	rh_posteriorcingulate	0.0567181	-0.00894871	32538	0.625508	1
PA_Pt_0_01	Volume	rh_supramarginal	0.102747	-0.00707763	32544	0.625508	1
PA_Pt_0_01	Volume	Right_Pallidum	0.0929569	0.00682851	32557	0.625508	1
WR_Pt_0_1	Volume	lh_posteriorcingulate	0.323829	-0.00471482	32534	0.625579	1
NREAD_Pt_0_001	Thickness	rh_bankssts	0.0644442	0.0100428	32551	0.626029	1
NREAD_Pt_1	Volume	rh_rostralanteriorcingulate	0.191599	-0.0065165	32552	0.62638	1
DYS_Pt_1	Volume	rh_entorhinal	0.393152	0.00450306	32477	0.627344	1
DYS_Pt_1	Volume	Right_Accumbens_area	0.398548	-0.00373656	32557	0.627344	1
SP_Pt_0_001	Thickness	rh_entorhinal	0.00922798	0.0142263	32502	0.627503	0.627503
NREP_Pt_e05	Area	lh_caudalmiddlefrontal	0.230471	0.00542066	32527	0.627719	1
NREP_Pt_e05	Area	lh_insula	0.28776	0.00434583	32541	0.627719	1
NREP_Pt_e05	Area	lh_isthmuscingulate	0.186037	-0.00562075	32523	0.627719	1
NREP_Pt_e05	Area	lh_lateralorbitofrontal	0.239305	0.00439446	32548	0.627719	1
NREP_Pt_e05	Area	lh_parahippocampal	0.295397	0.0049031	32517	0.627719	1
NREP_Pt_e05	Area	lh_superiorfrontal	0.243132	0.00419675	32546	0.627719	1
NREP_Pt_e05	Area	lh_supramarginal	0.184027	0.00566011	32533	0.627719	1
NREP_Pt_e05	Area	lh_transversetemporal	0.223766	0.00591776	32495	0.627719	1
NREP_Pt_e05	Area	rh_frontalpole	0.212921	0.00588791	32552	0.627719	1
NREP_Pt_e05	Area	rh_fusiform	0.270713	0.0043225	32548	0.627719	1
NREP_Pt_e05	Area	rh_inferiorparietal	0.179272	-0.00567451	32541	0.627719	1
NREP_Pt_e05	Area	rh_inferiortemporal	0.206209	0.0049666	32549	0.627719	1
NREP_Pt_e05	Area	rh_lingual	0.294083	-0.00496178	32551	0.627719	1
NREP_Pt_e05	Area	rh_rostralmiddlefrontal	0.28834	0.00400139	32542	0.627719	1
NREP_Pt_e05	Area	rh_supramarginal	0.291987	0.00449954	32542	0.627719	1
DYS_Pt_0_001	Volume	lh_lateraloccipital	0.260288	-0.00479549	32538	0.628187	1
DYS_Pt_0_001	Volume	lh_precentral	0.273446	-0.00464242	32544	0.628187	1
DYS_Pt_0_001	Volume	rh_inferiortemporal	0.266802	-0.00453439	32544	0.628187	1
DYS_Pt_0_5	Thickness	lh_medialorbitofrontal	0.517356	-0.00355177	32539	0.628218	1
DYS_Pt_0_1	Area	lh_lateralorbitofrontal	0.294499	0.00390654	32548	0.628301	1
DYS_Pt_0_1	Area	rh_parsopercularis	0.295671	0.00500414	32498	0.628301	1
PA_Pt_5e05	Area	lh_caudalanteriorcingulate	0.158236	0.00709389	32483	0.628677	1
PA_Pt_5e05	Area	lh_superiorfrontal	0.170735	0.00490365	32546	0.628677	1
PA_Pt_5e05	Area	lh_superiorparietal	0.16994	0.0060152	32546	0.628677	1
PA_Pt_5e05	Area	lh_temporalpole	0.140075	-0.00686513	32545	0.628677	1
PA_Pt_5e05	Area	rh_precentral	0.17566	0.00528596	32539	0.628677	1
DYS_Pt_0_001	Volume	rh_parahippocampal	0.281313	-0.00563782	32518	0.629253	1
PA_Pt_0_5	Volume	Right_VentralDC	0.267051	0.00385342	32557	0.630536	1
PA_Pt_0_5	Volume	Left_Caudate	0.278717	-0.00511401	32557	0.631066	1
PA_Pt_0_5	Volume	lh_bankssts	0.282124	0.0052411	32491	0.631066	1
PA_Pt_0_01	Volume	lh_postcentral	0.118852	0.00675247	32541	0.6314	1
SP_Pt_1e05	Volume	rh_lateraloccipital	0.0223179	0.00964109	32548	0.63234	1
DYS_Pt_0_1	Volume	lh_frontalpole	0.443593	0.00395777	32523	0.632408	1
DYS_Pt_0_1	Volume	lh_middletemporal	0.459973	-0.00304685	32546	0.632408	1
DYS_Pt_0_1	Volume	rh_caudalanteriorcingulate	0.451518	-0.00401905	32523	0.632408	1
DYS_Pt_0_1	Volume	rh_superiorparietal	0.461286	0.00319861	32548	0.632408	1
WR_Pt_1	Volume	Brain_Stem	0.131583	0.0055205	32557	0.633927	1
WR_Pt_1	Volume	lh_bankssts	0.0902965	0.00831533	32491	0.633927	1
WR_Pt_1	Volume	lh_entorhinal	0.145858	0.00765024	32472	0.633927	1
WR_Pt_1	Volume	lh_postcentral	0.121303	0.00676285	32541	0.633927	1
WR_Pt_1	Volume	lh_precentral	0.133332	0.00641068	32544	0.633927	1
WR_Pt_1	Volume	lh_precuneus	0.131317	-0.0060282	32537	0.633927	1
WR_Pt_1	Volume	lh_temporalpole	0.156617	0.00745847	32538	0.633927	1
WR_Pt_1	Volume	rh_insula	0.138413	0.00607447	32550	0.633927	1
WR_Pt_1	Volume	rh_posteriorcingulate	0.121292	-0.00733586	32538	0.633927	1
WR_Pt_1	Volume	Right_Putamen	0.154372	0.00609544	32557	0.633927	1
PA_Pt_0_5	Volume	lh_cuneus	0.29813	0.00514649	32517	0.63464	1
PA_Pt_0_5	Volume	lh_fusiform	0.298654	-0.00442806	32542	0.63464	1
DYS_Pt_0_01	Thickness	lh_caudalmiddlefrontal	0.523088	-0.00336058	32528	0.635178	1
SP_Pt_0_05	Area	lh_transversetemporal	0.318339	0.004834	32495	0.635433	1
SP_Pt_0_05	Area	rh_transversetemporal	0.327061	0.00459328	32513	0.635433	1
DYS_Pt_5e05	Volume	lh_bankssts	0.160886	-0.00683423	32491	0.63597	1
DYS_Pt_5e05	Volume	lh_medialorbitofrontal	0.164604	-0.00592829	32547	0.63597	1
WR_Pt_5e05	Area	lh_isthmuscingulate	0.0562525	-0.00807829	32523	0.636438	1
WR_Pt_5e05	Area	lh_paracentral	0.0512654	0.00861943	32529	0.636438	1
WR_Pt_5e05	Area	lh_temporalpole	0.0341922	-0.00985305	32545	0.636438	1
WR_Pt_5e05	Area	rh_lateraloccipital	0.0449927	0.00851162	32551	0.636438	1
WR_Pt_5e05	Area	rh_parstriangularis	0.0655156	-0.0086904	32525	0.636438	1
DYS_Pt_0_1	Area	rh_inferiortemporal	0.30908	0.003988	32549	0.636893	1
WR_Pt_0_05	Area	lh_bankssts	0.112919	0.00766544	32486	0.637676	1
WR_Pt_0_05	Area	rh_caudalmiddlefrontal	0.121909	0.00707246	32530	0.637676	1
DYS_Pt_0_5	Volume	rh_inferiortemporal	0.3982	-0.00345784	32544	0.638701	1
DYS_Pt_0_5	Volume	rh_parsopercularis	0.399407	0.00403987	32515	0.638701	1
DYS_Pt_0_5	Volume	rh_superiorfrontal	0.405763	-0.00310243	32542	0.638701	1
DYS_Pt_e05	Volume	lh_fusiform	0.135269	-0.00636653	32542	0.63877	1
DYS_Pt_1	Volume	lh_cuneus	0.420315	0.0039948	32517	0.638937	1
DYS_Pt_1	Volume	rh_rostralmiddlefrontal	0.420947	-0.00308681	32543	0.638937	1
SP_Pt_0_1	Volume	Left_Agdala	0.22558	-0.00503405	32557	0.639143	1
SP_Pt_0_1	Volume	rh_lingual	0.221322	-0.00603385	32550	0.639143	1
WR_Pt_0_5	Area	rh_frontalpole	0.0175464	0.0112575	32552	0.641867	1
WR_Pt_0_5	Area	rh_paracentral	0.0283177	-0.00972426	32530	0.641867	1
WR_Pt_0_5	Area	rh_superiortemporal	0.0214553	0.00882977	32540	0.641867	1
PA_Pt_1	Volume	Right_Pallidum	0.0604375	0.00763767	32557	0.642149	1
NREP_Pt_5e05	Volume	lh_entorhinal	0.0351646	0.0110011	32472	0.64273	1
NREP_Pt_5e05	Volume	lh_parsorbitalis	0.0529307	0.00903355	32540	0.64273	1
NREP_Pt_5e05	Volume	lh_parstriangularis	0.0437018	0.00964546	32535	0.64273	1
NREP_Pt_5e05	Volume	lh_transversetemporal	0.0220148	0.0115734	32524	0.64273	1
NREP_Pt_5e05	Volume	rh_bankssts	0.051694	-0.00952126	32530	0.64273	1
NREP_Pt_5e05	Volume	rh_transversetemporal	0.0445302	0.0101051	32523	0.64273	1
WR_Pt_1e05	Thickness	lh_precentral	0.378169	0.00464553	32534	0.642888	1
WR_Pt_5e05	Area	lh_entorhinal	0.0912804	0.00864218	32528	0.642955	1
WR_Pt_5e05	Area	lh_frontalpole	0.154421	-0.00667979	32542	0.642955	1
WR_Pt_5e05	Area	lh_inferiorparietal	0.150377	0.00631809	32535	0.642955	1
WR_Pt_5e05	Area	lh_precuneus	0.181903	-0.00530898	32538	0.642955	1
WR_Pt_5e05	Area	lh_transversetemporal	0.168023	-0.0066762	32495	0.642955	1
WR_Pt_5e05	Area	rh_entorhinal	0.133365	0.00760512	32519	0.642955	1
WR_Pt_5e05	Area	rh_frontalpole	0.122524	0.00726738	32552	0.642955	1
WR_Pt_5e05	Area	rh_inferiortemporal	0.189104	0.00513687	32549	0.642955	1
WR_Pt_5e05	Area	rh_lateralorbitofrontal	0.107976	-0.00652821	32550	0.642955	1
WR_Pt_5e05	Area	rh_lingual	0.139794	0.0069517	32551	0.642955	1
WR_Pt_5e05	Area	rh_parsopercularis	0.15034	-0.00686652	32498	0.642955	1
WR_Pt_5e05	Area	rh_precentral	0.127539	0.00594788	32539	0.642955	1
WR_Pt_5e05	Area	rh_transversetemporal	0.178017	-0.00631081	32513	0.642955	1
WR_Pt_0_05	Volume	rh_entorhinal	0.323589	-0.0052132	32477	0.643041	1
WR_Pt_0_05	Volume	rh_inferiorparietal	0.329479	-0.0041212	32547	0.643041	1
WR_Pt_0_05	Volume	Right_Thalamus_Proper	0.332868	0.0032688	32557	0.643041	1
DYS_Pt_5e08	Area	rh_posteriorcingulate	0.340635	0.0042268	32530	0.643423	1
WR_Pt_1e05	Volume	rh_rostralmiddlefrontal	0.343896	-0.00362225	32543	0.643638	1
WR_Pt_1e05	Volume	rh_superiorparietal	0.348322	-0.0040627	32548	0.643638	1
WR_Pt_0_5	Volume	Left_Putamen	0.298973	0.00440653	32557	0.64396	1
WR_Pt_0_5	Volume	lh_caudalanteriorcingulate	0.32103	0.00533775	32537	0.64396	1
WR_Pt_0_5	Volume	lh_caudalmiddlefrontal	0.339278	0.00437976	32534	0.64396	1
WR_Pt_0_5	Volume	lh_entorhinal	0.213983	0.00653455	32472	0.64396	1
WR_Pt_0_5	Volume	lh_lateralorbitofrontal	0.309846	-0.00401896	32553	0.64396	1
WR_Pt_0_5	Volume	lh_middletemporal	0.28989	0.00438546	32546	0.64396	1
WR_Pt_0_5	Volume	lh_parahippocampal	0.188812	0.00696774	32532	0.64396	1
WR_Pt_0_5	Volume	lh_parsorbitalis	0.281789	0.00505815	32540	0.64396	1
WR_Pt_0_5	Volume	lh_superiortemporal	0.194586	0.00537528	32546	0.64396	1
WR_Pt_0_5	Volume	lh_supramarginal	0.25188	-0.00495472	32540	0.64396	1
WR_Pt_0_5	Volume	lh_transversetemporal	0.34092	0.00484606	32524	0.64396	1
WR_Pt_0_5	Volume	rh_inferiortemporal	0.295746	0.0042998	32544	0.64396	1
WR_Pt_0_5	Volume	rh_lateralorbitofrontal	0.305058	0.0041687	32544	0.64396	1
WR_Pt_0_5	Volume	rh_parahippocampal	0.333614	0.00509524	32518	0.64396	1
WR_Pt_0_5	Volume	rh_parstriangularis	0.218595	0.00588863	32535	0.64396	1
WR_Pt_0_5	Volume	rh_postcentral	0.269265	0.00491331	32537	0.64396	1
WR_Pt_0_5	Volume	rh_posteriorcingulate	0.217903	-0.00583158	32538	0.64396	1
WR_Pt_0_5	Volume	rh_rostralanteriorcingulate	0.267964	0.0055515	32552	0.64396	1
WR_Pt_0_5	Volume	rh_superiorfrontal	0.283003	0.00402549	32542	0.64396	1
WR_Pt_0_5	Volume	rh_supramarginal	0.247276	0.00505788	32544	0.64396	1
WR_Pt_0_5	Volume	Right_Pallidum	0.33922	0.0039149	32557	0.64396	1
WR_Pt_0_5	Volume	Right_Putamen	0.24636	0.00495935	32557	0.64396	1
WR_Pt_0_05	Volume	lh_pericalcarine	0.341136	-0.00491994	32531	0.644368	1
WR_Pt_0_05	Volume	Brain_Stem	0.364448	0.003308	32557	0.645376	1
WR_Pt_0_05	Volume	Left_Accumbens_area	0.350882	-0.00406871	32557	0.645376	1
WR_Pt_0_05	Volume	lh_parstriangularis	0.362272	0.00437221	32535	0.645376	1
PA_Pt_0_1	Thickness	lh_caudalanteriorcingulate	0.22494	0.0065651	32554	0.645552	1
PA_Pt_0_1	Thickness	lh_caudalmiddlefrontal	0.116443	-0.00825084	32528	0.645552	1
PA_Pt_0_1	Thickness	lh_entorhinal	0.38923	0.00470865	32468	0.645552	1
PA_Pt_0_1	Thickness	lh_fusiform	0.256202	-0.00612127	32532	0.645552	1
PA_Pt_0_1	Thickness	lh_inferiortemporal	0.349441	-0.00510396	32546	0.645552	1
PA_Pt_0_1	Thickness	lh_insula	0.300389	-0.0056518	32554	0.645552	1
PA_Pt_0_1	Thickness	lh_isthmuscingulate	0.382412	-0.00473803	32545	0.645552	1
PA_Pt_0_1	Thickness	lh_medialorbitofrontal	0.315168	0.00549527	32539	0.645552	1
PA_Pt_0_1	Thickness	lh_parahippocampal	0.377843	0.00478478	32554	0.645552	1
PA_Pt_0_1	Thickness	lh_parsorbitalis	0.371355	0.00483587	32541	0.645552	1
PA_Pt_0_1	Thickness	lh_parstriangularis	0.116386	-0.00834315	32539	0.645552	1
PA_Pt_0_1	Thickness	lh_posteriorcingulate	0.174881	0.00741617	32545	0.645552	1
PA_Pt_0_1	Thickness	lh_superiorfrontal	0.271451	-0.0055857	32527	0.645552	1
PA_Pt_0_1	Thickness	lh_supramarginal	0.383338	-0.00456458	32530	0.645552	1
PA_Pt_0_1	Thickness	lh_transversetemporal	0.205616	0.00701323	32552	0.645552	1
PA_Pt_0_1	Thickness	rh_caudalanteriorcingulate	0.175254	-0.00737082	32535	0.645552	1
PA_Pt_0_1	Thickness	rh_caudalmiddlefrontal	0.033549	-0.0111824	32529	0.645552	1
PA_Pt_0_1	Thickness	rh_cuneus	0.196856	-0.00707931	32550	0.645552	1
PA_Pt_0_1	Thickness	rh_fusiform	0.0341296	-0.0113495	32532	0.645552	1
[truncated: 8,833 more rows]

## Sheet: Supplementary table 2
Supplementary table 2
Associations Between Dyslexia and Dyslexia-related Polygenic Indices and White Matter Nodal Degree in UK Biobank dataset
Note. This table presents the associations between PGI for dyslexia/quantitative reading measures and white matter nodal degree across multiple metrics in the UK Biobank. Structural connectivity matrices were computed using two tractography configurations, connectivity threshold 30 (CT30) and probability threshold 50 (PT50), and included six edge weight measures: streamline count (SC), fractional…
Polygenic score	Measure	ROI	p_value	beta_std	sample_size	p_fdr	p_bonferroni	cross-modality
DYS_Pt_0_001	OD_CT30	lh_inferiorparietal	2.73395e-06	0.0253139	30666	0.000232386	0.000232386
PA_Pt_0_05	ICVF_CT30	lh_posteriorcingulate	4.97458e-06	-0.0252888	30666	0.000422839	0.000422839
PA_Pt_0_01	ICVF_PT50	Right_Hippocampus	5.61529e-06	-0.025688	30666	0.000433441	0.0004773
PA_Pt_0_01	ICVF_PT50	rh_supramarginal	1.01986e-05	-0.0248233	30666	0.000433441	0.000866881
PA_Pt_0_01	ICVF_CT30	lh_frontalpole	1.02719e-05	-0.0238508	30666	0.000436556	0.000873112
NREAD_Pt_0_05	MD_PT50	Right_Caudate	5.37842e-06	-0.025518	30666	0.000457166	0.000457166
PA_Pt_0_01	ICVF_CT30	lh_medialorbitofrontal	0.000127578	-0.0209513	30666	0.000700105	0.0108441
PA_Pt_0_01	ICVF_CT30	lh_parstriangularis	0.000139591	-0.0204857	30666	0.000700105	0.0118652
PA_Pt_0_01	ICVF_CT30	rh_middletemporal	0.000140021	-0.0209364	30666	0.000700105	0.0119018
DYS_Pt_e05	MD_PT50	Right_Pallidum	8.32209e-06	-0.0231448	30666	0.000707378	0.000707378
DYS_Pt_0_001	OD_CT30	lh_precentral	1.69853e-05	0.0224889	30666	0.000721875	0.00144375
PA_Pt_0_05	ICVF_CT30	lh_caudalanteriorcingulate	3.08729e-05	-0.022778	30666	0.000740943	0.0026242
PA_Pt_0_05	ICVF_CT30	lh_frontalpole	2.17161e-05	-0.0229624	30666	0.000740943	0.00184587
PA_Pt_0_05	ICVF_CT30	rh_superiorfrontal	3.48679e-05	-0.0223553	30666	0.000740943	0.00296377
DYS_Pt_0_01	SC_CT30	lh_postcentral	9.33036e-06	-0.0202973	30666	0.000793081	0.000793081	Thickness
PA_Pt_0_05	ICVF_CT30	Left_Caudate	0.000181127	-0.0200054	30666	0.000800615	0.0153958
PA_Pt_0_05	ICVF_CT30	Left_VentralDC	0.000232334	-0.0205352	30666	0.000800615	0.0197484
PA_Pt_0_05	ICVF_CT30	Right_Hippocampus	0.000223553	-0.0205743	30666	0.000800615	0.019002
PA_Pt_0_05	ICVF_CT30	lh_bankssts	0.000256792	-0.020051	30666	0.000800615	0.0218273
PA_Pt_0_05	ICVF_CT30	lh_medialorbitofrontal	0.00014468	-0.0207841	30666	0.000800615	0.0122978
PA_Pt_0_05	ICVF_CT30	lh_parsorbitalis	0.000253834	-0.0194282	30666	0.000800615	0.0215759
PA_Pt_0_05	ICVF_CT30	lh_postcentral	0.000212586	-0.0204951	30666	0.000800615	0.0180698
PA_Pt_0_05	ICVF_CT30	lh_precentral	0.000236289	-0.0202162	30666	0.000800615	0.0200846
PA_Pt_0_05	ICVF_CT30	lh_superiorparietal	0.000138463	-0.021122	30666	0.000800615	0.0117694
PA_Pt_0_05	ICVF_CT30	rh_caudalanteriorcingulate	0.000241658	-0.0200412	30666	0.000800615	0.0205409
PA_Pt_0_05	ICVF_CT30	rh_parsorbitalis	0.000199329	-0.0201208	30666	0.000800615	0.016943
PA_Pt_0_05	ICVF_CT30	rh_postcentral	0.000173084	-0.0209162	30666	0.000800615	0.0147121
PA_Pt_0_05	ICVF_CT30	rh_rostralmiddlefrontal	0.000172107	-0.0203157	30666	0.000800615	0.0146291
PA_Pt_0_05	ICVF_CT30	rh_superiortemporal	0.000155414	-0.0207992	30666	0.000800615	0.0132102
PA_Pt_0_05	ICVF_CT30	rh_supramarginal	0.000263069	-0.0202639	30666	0.000800615	0.0223609
PA_Pt_0_05	ICVF_CT30	rh_frontalpole	0.000263732	-0.0197617	30666	0.000800615	0.0224172
PA_Pt_0_05	ICVF_CT30	lh_fusiform	0.000346852	-0.019673	30666	0.00086713	0.0294824
DYS_Pt_0_01	SC_PT50	lh_postcentral	1.03367e-05	-0.0202805	30666	0.00087862	0.00087862	Thickness
PA_Pt_0_01	ISOVF_PT50	Right_Hippocampus	1.07848e-05	-0.0240715	30666	0.000916708	0.000916708
PA_Pt_0_01	ICVF_CT30	lh_inferiortemporal	0.000486186	-0.0190858	30666	0.00103315	0.0413258
PA_Pt_0_05	ICVF_CT30	Left_Pallidum	0.000551715	-0.019047	30666	0.00117239	0.0468958
WR_Pt_1	ISOVF_PT50	lh_precentral	1.43811e-05	-0.0225576	30666	0.00122239	0.00122239
DYS_Pt_1	SC_CT30	lh_precentral	2.9217e-05	-0.019612	30666	0.00124172	0.00248344	Thickness
DYS_Pt_1	SC_CT30	rh_precentral	2.43319e-05	-0.0202589	30666	0.00124172	0.00206821	Thickness
PA_Pt_0_01	ICVF_CT30	Right_Putamen	0.000749638	-0.0185307	30666	0.00127438	0.0637192
DYS_Pt_0_001	OD_CT30	Left_VentralDC	6.55378e-05	0.0203622	30666	0.00139268	0.00557071
DYS_Pt_5e08	OD_CT30	Left_Thalamus_Proper	3.28868e-05	0.0213425	30666	0.00139769	0.00279538	Volume
DYS_Pt_5e08	OD_CT30	lh_precentral	1.87785e-05	0.022368	30666	0.00139769	0.00159617
DYS_Pt_5e08	OD_CT30	Left_Caudate	8.23634e-05	0.0209031	30666	0.00140018	0.00700089
DYS_Pt_5e08	OD_CT30	Left_Putamen	7.48624e-05	0.0201594	30666	0.00140018	0.0063633
DYS_Pt_5e08	OD_CT30	lh_superiorfrontal	6.29143e-05	0.0212471	30666	0.00140018	0.00534772	Area
DYS_Pt_0_01	SC_CT30	lh_precentral	3.3929e-05	-0.0194221	30666	0.00144198	0.00288397	Thickness
PA_Pt_0_05	ICVF_CT30	rh_lateraloccipital	0.000864825	-0.0184497	30666	0.0014702	0.0735101
PA_Pt_0_01	ICVF_PT50	rh_parsopercularis	8.67092e-05	-0.0220118	30666	0.00147406	0.00737028
PA_Pt_0_01	ICVF_PT50	rh_postcentral	6.86517e-05	-0.0220847	30666	0.00147406	0.00583539
PA_Pt_0_01	ICVF_PT50	rh_superiorfrontal	8.30676e-05	-0.0215469	30666	0.00147406	0.00706075
SP_Pt_0_1	MD_PT50	Right_Caudate	1.73627e-05	-0.0241061	30666	0.00147583	0.00147583
WR_Pt_1	ISOVF_CT30	Left_Pallidum	8.23469e-05	-0.0206555	30666	0.00163036	0.00699949
WR_Pt_1	ISOVF_CT30	lh_caudalmiddlefrontal	3.65886e-05	-0.0209421	30666	0.00163036	0.00311003
WR_Pt_1	ISOVF_CT30	lh_paracentral	0.00013887	-0.0191992	30666	0.00163036	0.011804
WR_Pt_1	ISOVF_CT30	lh_parsopercularis	9.5697e-05	-0.0201443	30666	0.00163036	0.00813425
WR_Pt_1	ISOVF_CT30	lh_precentral	0.000153446	-0.0195449	30666	0.00163036	0.0130429
WR_Pt_1	ISOVF_CT30	lh_superiorparietal	0.000108264	-0.020328	30666	0.00163036	0.00920244
WR_Pt_1	ISOVF_CT30	rh_fusiform	0.000140855	-0.0207693	30666	0.00163036	0.0119727
WR_Pt_1	ISOVF_CT30	rh_middletemporal	0.000104438	-0.0205419	30666	0.00163036	0.00887723
WR_Pt_1	ISOVF_PT50	lh_paracentral	3.88169e-05	-0.0214396	30666	0.00164972	0.00329944
DYS_Pt_0_001	OD_CT30	lh_parstriangularis	9.81162e-05	0.0212649	30666	0.00166798	0.00833988
DYS_Pt_1	SC_PT50	lh_postcentral	5.88933e-05	-0.018503	30666	0.00166864	0.00500593	Thickness
DYS_Pt_1	SC_PT50	lh_precentral	4.82902e-05	-0.0191324	30666	0.00166864	0.00410467	Thickness
DYS_Pt_1	SC_PT50	rh_precentral	5.18266e-05	-0.0194472	30666	0.00166864	0.00440526	Thickness
SP_Pt_0_05	MD_PT50	Right_Caudate	2.03694e-05	-0.0238829	30666	0.0017314	0.0017314
PA_Pt_0_01	ICVF_PT50	rh_superiorparietal	0.000125268	-0.0212731	30666	0.00177463	0.0106478
PA_Pt_0_01	ICVF_PT50	lh_isthmuscingulate	0.000174842	-0.0212471	30666	0.0018577	0.0148616
PA_Pt_0_01	ICVF_PT50	rh_lateralorbitofrontal	0.000156636	-0.0209904	30666	0.0018577	0.0133141
DYS_Pt_0_05	SC_CT30	lh_precentral	2.34187e-05	-0.0198414	30666	0.00199059	0.00199059	Volume, Thickness
PA_Pt_0_05	ICVF_PT50	Right_Hippocampus	4.99344e-05	-0.0229509	30666	0.00212221	0.00424442
PA_Pt_0_05	ICVF_PT50	rh_superiorfrontal	4.62345e-05	-0.0223079	30666	0.00212221	0.00392993
WR_Pt_1	ISOVF_CT30	lh_postcentral	0.000242394	-0.0192165	30666	0.0021412	0.0206035
WR_Pt_1	ISOVF_CT30	rh_supramarginal	0.000251906	-0.0189484	30666	0.0021412	0.021412
PA_Pt_0_01	ICVF_CT30	rh_posteriorcingulate	0.00176965	-0.0169854	30666	0.00221207	0.150421
DYS_Pt_e05	OD_CT30	Left_VentralDC	4.55828e-05	0.0208078	30666	0.00223456	0.00387454
DYS_Pt_e05	OD_CT30	lh_medialorbitofrontal	0.000105156	0.0209399	30666	0.00223456	0.00893826
DYS_Pt_e05	OD_CT30	lh_precentral	7.01812e-05	0.0207979	30666	0.00223456	0.0059654
DYS_Pt_e05	OD_CT30	lh_rostralanteriorcingulate	9.59962e-05	0.0216459	30666	0.00223456	0.00815968
DYS_Pt_0_001	OD_CT30	lh_supramarginal	0.00016182	0.0200651	30666	0.00229245	0.0137547
PA_Pt_0_01	ICVF_CT30	lh_rostralanteriorcingulate	0.00192227	-0.0174234	30666	0.00236801	0.163393
WR_Pt_1	ISOVF_CT30	Right_Thalamus_Proper	0.000312166	-0.0174643	30666	0.00238694	0.0265341
WR_Pt_1	ISOVF_CT30	Right_VentralDC	0.000561634	-0.0180068	30666	0.00238694	0.0477389
WR_Pt_1	ISOVF_CT30	lh_bankssts	0.000523844	-0.0187739	30666	0.00238694	0.0445267
WR_Pt_1	ISOVF_CT30	lh_inferiortemporal	0.000512855	-0.0187047	30666	0.00238694	0.0435927
WR_Pt_1	ISOVF_CT30	lh_middletemporal	0.000530658	-0.018645	30666	0.00238694	0.0451059
WR_Pt_1	ISOVF_CT30	lh_precuneus	0.000514285	-0.0180262	30666	0.00238694	0.0437142
WR_Pt_1	ISOVF_CT30	lh_supramarginal	0.0004663	-0.0188585	30666	0.00238694	0.0396355
WR_Pt_1	ISOVF_CT30	rh_bankssts	0.000508202	-0.017721	30666	0.00238694	0.0431972
WR_Pt_1	ISOVF_CT30	rh_precuneus	0.000543355	-0.0175032	30666	0.00238694	0.0461852
WR_Pt_1	ISOVF_CT30	rh_superiorfrontal	0.000387067	-0.0175796	30666	0.00238694	0.0329007
PA_Pt_0_01	ICVF_CT30	rh_parsopercularis	0.00197317	-0.0167732	30666	0.002396	0.16772
DYS_Pt_5e08	OD_CT30	lh_caudalmiddlefrontal	0.0002037	0.0191311	30666	0.0024735	0.0173145
DYS_Pt_0_01	SC_PT50	lh_precentral	5.96881e-05	-0.0188694	30666	0.00253674	0.00507349	Thickness
WR_Pt_1	ISOVF_CT30	rh_caudalmiddlefrontal	0.000726904	-0.0167623	30666	0.00253937	0.0617868
WR_Pt_1	ISOVF_CT30	rh_lateraloccipital	0.000746875	-0.0179694	30666	0.00253937	0.0634844
DYS_Pt_0_001	OD_CT30	lh_medialorbitofrontal	0.00021133	0.0199941	30666	0.00256615	0.0179631
PA_Pt_0_01	ICVF_PT50	lh_supramarginal	0.000307351	-0.0200822	30666	0.00261248	0.0261248
DYS_Pt_0_5	SC_CT30	lh_precentral	6.15714e-05	-0.0188032	30666	0.00261678	0.00523357	Thickness
DYS_Pt_0_5	SC_CT30	rh_precentral	5.73645e-05	-0.0193129	30666	0.00261678	0.00487598	Thickness
DYS_Pt_0_5	SC_PT50	lh_inferiorparietal	0.00011658	-0.018997	30666	0.00284198	0.0099093	Thickness
DYS_Pt_0_5	SC_PT50	lh_postcentral	0.00013374	-0.0175941	30666	0.00284198	0.0113679	Thickness
DYS_Pt_0_5	SC_PT50	lh_precentral	9.117e-05	-0.0184243	30666	0.00284198	0.00774945	Thickness
DYS_Pt_0_5	SC_PT50	rh_precentral	0.000108904	-0.0185968	30666	0.00284198	0.00925684	Thickness
DYS_Pt_0_001	OD_CT30	lh_superiorparietal	0.000336696	0.0190209	30666	0.00286192	0.0286192
NREAD_Pt_0_05	OD_CT30	lh_rostralmiddlefrontal	3.41275e-05	0.0225128	30666	0.00290084	0.00290084
PA_Pt_0_05	ICVF_CT30	Left_Putamen	0.00240871	-0.0166721	30666	0.00301088	0.20474
DYS_Pt_0_05	SC_PT50	lh_precentral	3.55451e-05	-0.0194609	30666	0.00302133	0.00302133	Volume, Thickness
DYS_Pt_1	SC_PT50	lh_inferiorparietal	0.000168923	-0.0185431	30666	0.00308276	0.0143585	Thickness
DYS_Pt_1	SC_PT50	rh_inferiorparietal	0.000181339	-0.0183716	30666	0.00308276	0.0154138
DYS_Pt_e05	OD_CT30	lh_insula	0.000192281	0.0198558	30666	0.00326878	0.0163439	Volume, Area
DYS_Pt_0_01	OD_PT50	lh_pericalcarine	3.91101e-05	0.0225917	30666	0.00332436	0.00332436
WR_Pt_0_1	ISOVF_CT30	lh_inferiorparietal	0.000668026	-0.0182432	30666	0.00334013	0.0567822
PA_Pt_0_05	ICVF_PT50	rh_precuneus	0.000158549	-0.0208332	30666	0.00336917	0.0134767
WR_Pt_1	ISOVF_CT30	Left_Caudate	0.00129251	-0.0161578	30666	0.00337458	0.109864
WR_Pt_1	ISOVF_CT30	rh_postcentral	0.00133942	-0.0163055	30666	0.00337458	0.11385
WR_Pt_1	ISOVF_CT30	rh_rostralmiddlefrontal	0.00134983	-0.0164159	30666	0.00337458	0.114736
WR_Pt_0_5	ISOVF_PT50	lh_precentral	3.98728e-05	-0.0213555	30666	0.00338919	0.00338919
DYS_Pt_5e08	OD_CT30	lh_medialorbitofrontal	0.000332556	0.0193615	30666	0.00353341	0.0282673
PA_Pt_0_01	ICVF_PT50	rh_caudalmiddlefrontal	0.000540878	-0.0190948	30666	0.00353651	0.0459746
WR_Pt_1	ISOVF_PT50	Right_Thalamus_Proper	0.000214493	-0.018205	30666	0.00368245	0.0182319
WR_Pt_1	ISOVF_PT50	lh_caudalmiddlefrontal	0.000346584	-0.0187263	30666	0.00368245	0.0294596
WR_Pt_1	ISOVF_PT50	rh_inferiorparietal	0.000312478	-0.0191183	30666	0.00368245	0.0265606
WR_Pt_0_05	ISOVF_PT50	rh_paracentral	0.000216849	-0.0187554	30666	0.00368245	0.0184322
DYS_Pt_1	ISOVF_PT50	rh_superiorfrontal	0.00028905	-0.0180486	30666	0.00368245	0.0245693
WR_Pt_0_5	ISOVF_PT50	lh_paracentral	9.06417e-05	-0.02039	30666	0.00385227	0.00770454
NREAD_Pt_0_1	MD_PT50	Right_Caudate	4.65472e-05	-0.0228689	30666	0.00395651	0.00395651
PA_Pt_0_01	ISOVF_PT50	rh_postcentral	0.000108338	-0.0202361	30666	0.00460437	0.00920873
PA_Pt_0_05	ISOVF_PT50	lh_lateralorbitofrontal	0.000190471	-0.0203921	30666	0.00467434	0.01619
PA_Pt_0_05	ISOVF_PT50	lh_lingual	6.98901e-05	-0.0216348	30666	0.00467434	0.00594066
PA_Pt_0_05	ISOVF_PT50	lh_medialorbitofrontal	0.000122368	-0.0211159	30666	0.00467434	0.0104013
PA_Pt_0_05	ISOVF_PT50	rh_lateralorbitofrontal	0.000219969	-0.0197151	30666	0.00467434	0.0186974
WR_Pt_1	ISOVF_CT30	rh_precentral	0.0022208	-0.0154351	30666	0.00471921	0.188768
DYS_Pt_0_5	SC_CT30	lh_inferiorparietal	0.000225094	-0.0180032	30666	0.00478325	0.019133	Thickness
WR_Pt_0_05	ISOVF_CT30	lh_caudalmiddlefrontal	0.000268785	-0.0184158	30666	0.00480121	0.0228467
WR_Pt_0_05	ISOVF_CT30	lh_postcentral	0.000179593	-0.0195403	30666	0.00480121	0.0152654
WR_Pt_0_05	ISOVF_CT30	lh_precentral	0.000279242	-0.0186918	30666	0.00480121	0.0237356
WR_Pt_0_05	ISOVF_CT30	lh_superiorparietal	0.000416285	-0.0184642	30666	0.00480121	0.0353842
WR_Pt_0_05	ISOVF_CT30	rh_bankssts	0.000440501	-0.017848	30666	0.00480121	0.0374426
WR_Pt_0_05	ISOVF_CT30	rh_caudalmiddlefrontal	0.00041813	-0.0174361	30666	0.00480121	0.035541
WR_Pt_0_05	ISOVF_CT30	rh_postcentral	0.000451879	-0.0177651	30666	0.00480121	0.0384097
WR_Pt_0_05	ISOVF_CT30	rh_supramarginal	0.000441718	-0.0181217	30666	0.00480121	0.037546
WR_Pt_0_5	ISOVF_CT30	Left_Pallidum	0.000196512	-0.019526	30666	0.0048259	0.0167035
WR_Pt_0_5	ISOVF_CT30	lh_caudalmiddlefrontal	0.000129654	-0.0194088	30666	0.0048259	0.0110206
WR_Pt_0_5	ISOVF_CT30	lh_paracentral	0.000299749	-0.018212	30666	0.0048259	0.0254787
WR_Pt_0_5	ISOVF_CT30	lh_parsopercularis	0.00027656	-0.0187698	30666	0.0048259	0.0235076
WR_Pt_0_5	ISOVF_CT30	lh_precentral	0.000454202	-0.018098	30666	0.0048259	0.0386072
WR_Pt_0_5	ISOVF_CT30	lh_superiorparietal	0.000378809	-0.0186578	30666	0.0048259	0.0321988
WR_Pt_0_5	ISOVF_CT30	rh_fusiform	0.000402129	-0.0193005	30666	0.0048259	0.034181
WR_Pt_0_5	ISOVF_CT30	rh_middletemporal	0.00038346	-0.0187946	30666	0.0048259	0.0325941
PA_Pt_0_05	ICVF_PT50	lh_precuneus	0.000292955	-0.0198659	30666	0.00498024	0.0249012
DYS_Pt_1	SC_CT30	rh_inferiorparietal	0.000236144	-0.0179392	30666	0.00501806	0.0200722
SP_Pt_0_05	ISOVF_PT50	Right_Caudate	5.90667e-05	-0.0214196	30666	0.00502067	0.00502067
WR_Pt_1	ISOVF_PT50	rh_fusiform	0.00149299	-0.0171963	30666	0.00507618	0.126904
PA_Pt_0_01	ICVF_PT50	Right_Caudate	0.000923796	-0.0181664	30666	0.00523484	0.0785227
NREAD_Pt_0_05	SC_CT30	Left_Caudate	6.32871e-05	-0.0212779	30666	0.0053794	0.0053794
WR_Pt_0_05	ISOVF_CT30	lh_paracentral	0.000633492	-0.0171529	30666	0.00538468	0.0538468
DYS_Pt_0_5	SC_PT50	rh_inferiorparietal	0.00033101	-0.0176179	30666	0.00562717	0.0281359
WR_Pt_0_1	ISOVF_PT50	Right_Amygdala	0.000398054	-0.0196415	30666	0.00574753	0.0338346
WR_Pt_0_1	ISOVF_PT50	lh_inferiorparietal	0.000405708	-0.0191938	30666	0.00574753	0.0344852
WR_Pt_0_1	ISOVF_PT50	rh_inferiorparietal	0.000285334	-0.0192057	30666	0.00574753	0.0242534
PA_Pt_0_01	ISOVF_PT50	lh_caudalmiddlefrontal	0.000915853	-0.0172129	30666	0.00582056	0.0778475
PA_Pt_0_01	ISOVF_PT50	lh_inferiorparietal	0.000926606	-0.0178662	30666	0.00582056	0.0787615
PA_Pt_0_01	ISOVF_PT50	lh_lateraloccipital	0.00102	-0.0171825	30666	0.00582056	0.0866998
PA_Pt_0_01	ISOVF_PT50	lh_lateralorbitofrontal	0.000694751	-0.0185337	30666	0.00582056	0.0590538
PA_Pt_0_01	ISOVF_PT50	lh_lingual	0.000363097	-0.0193962	30666	0.00582056	0.0308632
PA_Pt_0_01	ISOVF_PT50	lh_parstriangularis	0.000776961	-0.0174665	30666	0.00582056	0.0660417
PA_Pt_0_01	ISOVF_PT50	lh_precuneus	0.00102716	-0.0170097	30666	0.00582056	0.0873084
PA_Pt_0_01	ISOVF_PT50	lh_rostralmiddlefrontal	0.000336045	-0.0189741	30666	0.00582056	0.0285638
PA_Pt_0_01	ISOVF_PT50	lh_supramarginal	0.000538821	-0.0186663	30666	0.00582056	0.0457998
PA_Pt_0_01	ISOVF_PT50	rh_parsopercularis	0.000434193	-0.0176001	30666	0.00582056	0.0369064
PA_Pt_0_01	ISOVF_PT50	rh_parstriangularis	0.00101932	-0.016852	30666	0.00582056	0.0866422
PA_Pt_0_01	ISOVF_PT50	rh_precuneus	0.000704818	-0.017268	30666	0.00582056	0.0599095
PA_Pt_0_01	ISOVF_PT50	rh_supramarginal	0.000479989	-0.0182488	30666	0.00582056	0.0407991
DYS_Pt_1	SC_CT30	lh_inferiorparietal	0.000352891	-0.0174355	30666	0.00599915	0.0299957	Thickness
SP_Pt_0_5	ISOVF_PT50	rh_lateraloccipital	0.00287219	-0.016077	30666	0.00610341	0.244136
WR_Pt_0_1	ISOVF_CT30	lh_inferiortemporal	0.00176105	-0.0168087	30666	0.00623706	0.149689
WR_Pt_0_1	ISOVF_CT30	Right_Pallidum	0.00186123	-0.0157364	30666	0.00632818	0.158205
NREAD_Pt_5e05	OD_PT50	rh_postcentral	7.96359e-05	0.0211372	30666	0.00676905	0.00676905
PA_Pt_0_01	ICVF_PT50	lh_postcentral	0.00165588	-0.0174467	30666	0.00703751	0.14075
DYS_Pt_0_5	SC_CT30	rh_inferiorparietal	0.000426536	-0.0171909	30666	0.00725111	0.0362556
WR_Pt_0_5	ISOVF_CT30	Right_VentralDC	0.00206246	-0.0160782	30666	0.00730454	0.175309
NREAD_Pt_0_05	OD_CT30	lh_lateraloccipital	0.000172036	0.0190824	30666	0.00731153	0.0146231
PA_Pt_0_05	ISOVF_PT50	lh_rostralmiddlefrontal	0.000438618	-0.0186055	30666	0.00745651	0.0372825
DYS_Pt_5e08	OD_CT30	rh_supramarginal	0.00141229	0.0168658	30666	0.0075028	0.120045
NREAD_Pt_0_5	ISOVF_CT30	lh_paracentral	0.000179236	-0.0187952	30666	0.00761753	0.0152351
NREAD_Pt_0_5	ISOVF_CT30	rh_paracentral	0.000116147	-0.0188313	30666	0.00761753	0.0098725
WR_Pt_0_05	ISOVF_CT30	rh_fusiform	0.00152182	-0.0172339	30666	0.0076714	0.129355
WR_Pt_0_05	ISOVF_CT30	rh_parsopercularis	0.00153428	-0.0160302	30666	0.0076714	0.130414
DYS_Pt_5e08	OD_CT30	rh_postcentral	0.00154322	0.0167555	30666	0.00771611	0.131174
WR_Pt_0_1	ISOVF_CT30	rh_inferiortemporal	0.00259214	-0.0160166	30666	0.00786898	0.220331
DYS_Pt_0_05	FA_PT50	Right_Pallidum	0.000105645	-0.0214254	30666	0.00799212	0.00897983
DYS_Pt_0_05	FA_PT50	rh_parsopercularis	0.00018805	-0.020887	30666	0.00799212	0.0159842
WR_Pt_0_5	ISOVF_CT30	rh_inferiortemporal	0.0028617	-0.0158814	30666	0.00810816	0.243245
WR_Pt_0_5	ISOVF_CT30	lh_lateralorbitofrontal	0.00305703	-0.0164102	30666	0.00812023	0.259847
WR_Pt_0_5	ISOVF_CT30	rh_postcentral	0.00300184	-0.0150809	30666	0.00812023	0.255156
PA_Pt_0_01	ICVF_PT50	Left_Caudate	0.0023899	-0.0170464	30666	0.00812566	0.203142
PA_Pt_0_1	ICVF_CT30	lh_caudalanteriorcingulate	0.00138821	-0.0174796	30666	0.00817047	0.117998
PA_Pt_0_1	ICVF_CT30	lh_isthmuscingulate	0.00192246	-0.0171433	30666	0.00817047	0.163409
PA_Pt_0_1	ICVF_CT30	lh_medialorbitofrontal	0.00168999	-0.0171762	30666	0.00817047	0.143649
PA_Pt_0_1	ICVF_CT30	lh_parsopercularis	0.000816938	-0.0180936	30666	0.00817047	0.0694397
PA_Pt_0_1	ICVF_CT30	lh_parstriangularis	0.00179641	-0.0167959	30666	0.00817047	0.152695
PA_Pt_0_1	ICVF_CT30	lh_postcentral	0.000997908	-0.0182152	30666	0.00817047	0.0848222
PA_Pt_0_1	ICVF_CT30	lh_posteriorcingulate	0.000206369	-0.0205581	30666	0.00817047	0.0175414
PA_Pt_0_1	ICVF_CT30	lh_precentral	0.00105371	-0.0180144	30666	0.00817047	0.0895654	Volume
PA_Pt_0_1	ICVF_CT30	lh_precuneus	0.00166516	-0.0173848	30666	0.00817047	0.141539
PA_Pt_0_1	ICVF_CT30	lh_superiorfrontal	0.000802177	-0.0181867	30666	0.00817047	0.068185
PA_Pt_0_1	ICVF_CT30	lh_superiorparietal	0.00150367	-0.0175945	30666	0.00817047	0.127812
PA_Pt_0_1	ICVF_CT30	lh_frontalpole	0.000125304	-0.0207432	30666	0.00817047	0.0106508
PA_Pt_0_1	ICVF_CT30	rh_medialorbitofrontal	0.00112274	-0.0177173	30666	0.00817047	0.0954332
PA_Pt_0_1	ICVF_CT30	rh_parsorbitalis	0.00102399	-0.0177649	30666	0.00817047	0.0870392
PA_Pt_0_1	ICVF_CT30	rh_parstriangularis	0.00181337	-0.0168896	30666	0.00817047	0.154136
PA_Pt_0_1	ICVF_CT30	rh_precentral	0.00168363	-0.0173771	30666	0.00817047	0.143108	Volume
PA_Pt_0_1	ICVF_CT30	rh_rostralanteriorcingulate	0.0017423	-0.0173376	30666	0.00817047	0.148096
PA_Pt_0_1	ICVF_CT30	rh_rostralmiddlefrontal	0.00183795	-0.016849	30666	0.00817047	0.156225
PA_Pt_0_1	ICVF_CT30	rh_superiorfrontal	0.000598441	-0.018541	30666	0.00817047	0.0508675
PA_Pt_0_1	ICVF_CT30	rh_frontalpole	0.00174785	-0.0169557	30666	0.00817047	0.148567
WR_Pt_0_05	ISOVF_CT30	rh_superiorparietal	0.00221239	-0.0156793	30666	0.00817624	0.188053
NREAD_Pt_5e05	OD_PT50	lh_caudalmiddlefrontal	0.000192647	0.0201107	30666	0.0081875	0.016375
DYS_Pt_5e05	OD_CT30	Left_VentralDC	9.64182e-05	0.0198976	30666	0.00819555	0.00819555
WR_Pt_1	ISOVF_CT30	lh_insula	0.0048411	-0.0149225	30666	0.00822988	0.411494
NREAD_Pt_0_05	MD_PT50	rh_precuneus	0.000194313	-0.0199851	30666	0.0082583	0.0165166
DYS_Pt_5e05	OD_CT30	lh_medialorbitofrontal	0.000230841	0.0198801	30666	0.00826026	0.0196215
DYS_Pt_5e05	OD_CT30	lh_precentral	0.000304958	0.0188879	30666	0.00826026	0.0259214
DYS_Pt_5e05	OD_CT30	lh_supramarginal	0.000388718	0.0188776	30666	0.00826026	0.033041
PA_Pt_0_1	ICVF_CT30	Left_Caudate	0.00238828	-0.0162311	30666	0.00826243	0.203004
PA_Pt_0_1	ICVF_CT30	lh_inferiorparietal	0.00287577	-0.0164039	30666	0.00826243	0.244441
PA_Pt_0_1	ICVF_CT30	lh_parsorbitalis	0.00228074	-0.0162052	30666	0.00826243	0.193863
PA_Pt_0_1	ICVF_CT30	lh_insula	0.00289191	-0.0163824	30666	0.00826243	0.245812
PA_Pt_0_1	ICVF_CT30	rh_cuneus	0.00291615	-0.0166994	30666	0.00826243	0.247873
PA_Pt_0_1	ICVF_CT30	rh_fusiform	0.002466	-0.0167212	30666	0.00826243	0.20961
PA_Pt_0_1	ICVF_CT30	rh_lateralorbitofrontal	0.00284947	-0.0162591	30666	0.00826243	0.242205
PA_Pt_0_1	ICVF_CT30	rh_postcentral	0.0026952	-0.0167146	30666	0.00826243	0.229092
PA_Pt_0_1	ICVF_CT30	rh_precuneus	0.00218408	-0.0169789	30666	0.00826243	0.185647
PA_Pt_0_1	ICVF_CT30	rh_supramarginal	0.00250546	-0.0167874	30666	0.00826243	0.212964
DYS_Pt_e05	MD_PT50	rh_parstriangularis	0.000194612	-0.0200762	30666	0.00827101	0.016542
PA_Pt_0_05	MD_CT30	rh_frontalpole	9.73885e-05	0.0206659	30666	0.00827802	0.00827802
WR_Pt_0_1	ISOVF_PT50	lh_precuneus	0.000988898	-0.0171698	30666	0.00840563	0.0840563
WR_Pt_0_1	ISOVF_PT50	rh_precuneus	0.000912014	-0.0170082	30666	0.00840563	0.0775212
WR_Pt_0_1	ISOVF_PT50	rh_supramarginal	0.000894382	-0.0174678	30666	0.00840563	0.0760225
DYS_Pt_e05	OD_CT30	Left_Putamen	0.00060087	0.0174794	30666	0.00851232	0.0510739
PA_Pt_0_1	ICVF_CT30	lh_bankssts	0.00332155	-0.0161091	30666	0.0085555	0.282332
PA_Pt_0_1	ICVF_CT30	rh_caudalanteriorcingulate	0.00312035	-0.0161385	30666	0.0085555	0.26523
PA_Pt_0_1	ICVF_CT30	rh_middletemporal	0.0032756	-0.0161717	30666	0.0085555	0.278426
PA_Pt_0_1	ICVF_CT30	Left_Pallidum	0.00342336	-0.0161414	30666	0.00855841	0.290986
WR_Pt_0_05	ISOVF_CT30	lh_middletemporal	0.0025312	-0.0161885	30666	0.0086061	0.215152
WR_Pt_0_5	ISOVF_PT50	Right_Thalamus_Proper	0.000639211	-0.0167881	30666	0.00867551	0.0543329
WR_Pt_0_5	ISOVF_PT50	Right_Caudate	0.000643061	-0.0183225	30666	0.00867551	0.0546602
WR_Pt_0_5	ISOVF_PT50	rh_inferiorparietal	0.000799331	-0.0177771	30666	0.00867551	0.0679431
WR_Pt_0_5	ISOVF_PT50	rh_paracentral	0.000448431	-0.0177921	30666	0.00867551	0.0381166
WR_Pt_0_5	ISOVF_PT50	rh_superiorfrontal	0.000816519	-0.0166597	30666	0.00867551	0.0694041
PA_Pt_0_05	ICVF_CT30	lh_rostralanteriorcingulate	0.00760117	-0.0149952	30666	0.00873107	0.646099
DYS_Pt_0_1	SC_CT30	lh_precentral	0.000102882	-0.0182243	30666	0.00874497	0.00874497	Thickness
NREAD_Pt_0_05	MD_CT30	Left_Putamen	0.000846158	-0.0169403	30666	0.00899043	0.0719234
NREAD_Pt_0_05	MD_CT30	Left_Pallidum	0.000322314	-0.0184526	30666	0.00899043	0.0273967
NREAD_Pt_0_05	MD_CT30	Right_Putamen	0.000678465	-0.0172766	30666	0.00899043	0.0576695
NREAD_Pt_0_05	MD_CT30	lh_bankssts	0.00079934	-0.0180579	30666	0.00899043	0.0679439
NREAD_Pt_0_05	MD_CT30	lh_insula	0.000304622	-0.0186934	30666	0.00899043	0.0258929
NREAD_Pt_0_05	MD_CT30	rh_inferiorparietal	0.000764956	-0.0179463	30666	0.00899043	0.0650213
NREAD_Pt_0_05	MD_CT30	rh_paracentral	0.000457398	-0.0181094	30666	0.00899043	0.0388788
NREAD_Pt_0_05	MD_CT30	rh_precuneus	0.000421253	-0.0184693	30666	0.00899043	0.0358065
WR_Pt_0_5	ISOVF_CT30	lh_superiorfrontal	0.00360526	-0.0143004	30666	0.00901316	0.306447
DYS_Pt_0_05	SC_CT30	lh_inferiorparietal	0.000239212	-0.017921	30666	0.00908969	0.020333
DYS_Pt_0_05	SC_CT30	lh_postcentral	0.000370475	-0.0163261	30666	0.00908969	0.0314904
DYS_Pt_0_05	SC_CT30	rh_precentral	0.00042775	-0.0169021	30666	0.00908969	0.0363588	Volume, Thickness
DYS_Pt_0_1	SC_CT30	lh_postcentral	0.000227929	-0.0169064	30666	0.00968698	0.019374
WR_Pt_0_05	ISOVF_PT50	lh_inferiortemporal	0.00114388	-0.0173037	30666	0.00972296	0.0972296
PA_Pt_0_01	ICVF_PT50	rh_isthmuscingulate	0.00322377	-0.0165808	30666	0.00978645	0.274021
DYS_Pt_0_1	SC_PT50	lh_postcentral	0.000231677	-0.016958	30666	0.00984627	0.0196925
DYS_Pt_0_1	SC_PT50	lh_precentral	0.000156746	-0.0177973	30666	0.00984627	0.0133234	Thickness
WR_Pt_0_05	ISOVF_PT50	rh_paracentral	0.00136686	-0.0161746	30666	0.00994651	0.116183
WR_Pt_0_05	ISOVF_PT50	rh_postcentral	0.00140421	-0.0167679	30666	0.00994651	0.119358
PA_Pt_0_05	ISOVF_CT30	lh_cuneus	0.000446332	-0.018247	30666	0.010082	0.0379382
PA_Pt_0_05	ISOVF_CT30	lh_lateralorbitofrontal	0.000474446	-0.0192156	30666	0.010082	0.0403279
PA_Pt_0_05	ISOVF_CT30	lh_lingual	0.000199324	-0.0192001	30666	0.010082	0.0169425
PA_Pt_0_05	ISOVF_CT30	rh_lingual	0.000457465	-0.0184433	30666	0.010082	0.0388845
WR_Pt_0_05	ISOVF_PT50	Right_Hippocampus	0.00206934	-0.0169214	30666	0.0103467	0.175894
WR_Pt_0_05	ISOVF_PT50	lh_bankssts	0.0016624	-0.0171968	30666	0.0103467	0.141304
WR_Pt_0_05	ISOVF_PT50	lh_medialorbitofrontal	0.00195255	-0.0170981	30666	0.0103467	0.165966
WR_Pt_0_05	ISOVF_PT50	rh_fusiform	0.00201319	-0.0166582	30666	0.0103467	0.171121
WR_Pt_0_05	ISOVF_PT50	rh_inferiortemporal	0.0018831	-0.016456	30666	0.0103467	0.160063
NREAD_Pt_0_5	ISOVF_CT30	lh_posteriorcingulate	0.000365781	-0.0178998	30666	0.0103638	0.0310914
DYS_Pt_e05	SC_PT50	lh_rostralanteriorcingulate	0.000122252	-0.0203563	30666	0.0103914	0.0103914
WR_Pt_0_5	ISOVF_PT50	Left_Pallidum	0.00186375	-0.0155419	30666	0.0105613	0.158419
WR_Pt_0_5	ISOVF_PT50	Right_Pallidum	0.00183753	-0.0154775	30666	0.0105613	0.15619
DYS_Pt_0_05	FA_PT50	rh_rostralanteriorcingulate	0.000375822	-0.0198085	30666	0.0106483	0.0319449
NREAD_Pt_0_05	MD_CT30	lh_inferiortemporal	0.00215279	-0.0159628	30666	0.0107639	0.182987
DYS_Pt_5e08	OD_CT30	lh_precuneus	0.0025441	0.0160812	30666	0.0108124	0.216249
PA_Pt_0_1	ICVF_CT30	lh_lateraloccipital	0.00512834	-0.0153639	30666	0.0108977	0.435909
WR_Pt_0_5	ISOVF_PT50	rh_supramarginal	0.00282539	-0.0157277	30666	0.0109163	0.240158
PA_Pt_0_05	ISOVF_CT30	rh_inferiortemporal	0.000645078	-0.0180321	30666	0.0109663	0.0548316
PA_Pt_0_05	ICVF_PT50	lh_isthmuscingulate	0.00206655	-0.0174434	30666	0.0109786	0.175657
PA_Pt_0_05	ISOVF_CT30	lh_bankssts	0.00198944	-0.0166041	30666	0.0111522	0.169103
PA_Pt_0_05	ISOVF_CT30	lh_fusiform	0.000942438	-0.0175162	30666	0.0111522	0.0801072
PA_Pt_0_05	ISOVF_CT30	lh_inferiortemporal	0.00179111	-0.0166816	30666	0.0111522	0.152244
PA_Pt_0_05	ISOVF_CT30	lh_lateraloccipital	0.00152603	-0.0164295	30666	0.0111522	0.129713
PA_Pt_0_05	ISOVF_CT30	lh_parsopercularis	0.00188595	-0.0159201	30666	0.0111522	0.160305
PA_Pt_0_05	ISOVF_CT30	lh_parstriangularis	0.00223043	-0.0158222	30666	0.0111522	0.189587
PA_Pt_0_05	ISOVF_CT30	lh_insula	0.00103839	-0.0172342	30666	0.0111522	0.0882635
PA_Pt_0_05	ISOVF_CT30	rh_lateralorbitofrontal	0.00170678	-0.01693	30666	0.0111522	0.145076
PA_Pt_0_05	ISOVF_CT30	rh_middletemporal	0.00171719	-0.0164681	30666	0.0111522	0.145961
PA_Pt_0_05	ISOVF_CT30	rh_parsorbitalis	0.00194958	-0.016802	30666	0.0111522	0.165714
PA_Pt_0_05	ISOVF_CT30	rh_superiortemporal	0.00216291	-0.0162373	30666	0.0111522	0.183847
PA_Pt_0_05	ISOVF_CT30	rh_insula	0.00203977	-0.015963	30666	0.0111522	0.17338
WR_Pt_0_5	ISOVF_CT30	rh_precentral	0.00524865	-0.0140797	30666	0.0111534	0.446136
PA_Pt_0_05	ISOVF_CT30	rh_precuneus	0.00236851	-0.0152625	30666	0.0111846	0.201324
WR_Pt_0_1	ISOVF_CT30	Right_Thalamus_Proper	0.00449102	-0.0137391	30666	0.0112275	0.381736
DYS_Pt_1	SC_CT30	rh_superiortemporal	0.00107797	-0.0157804	30666	0.0114534	0.0916275	Volume, Thickness
DYS_Pt_0_01	OD_CT30	lh_precentral	0.000541959	0.018104	30666	0.0115166	0.0460665	Thickness
DYS_Pt_0_001	ISOVF_PT50	rh_posteriorcingulate	0.00678387	-0.0141958	30666	0.0115326	0.576629
PA_Pt_0_05	ISOVF_CT30	rh_rostralmiddlefrontal	0.00277621	-0.0152004	30666	0.0117989	0.235978
NREAD_Pt_0_05	OD_PT50	Left_Putamen	0.000556598	0.0179293	30666	0.0118277	0.0473108
NREAD_Pt_0_05	OD_PT50	lh_superiorfrontal	0.000469632	0.0191552	30666	0.0118277	0.0399187
NREAD_Pt_0_05	OD_PT50	rh_lateralorbitofrontal	0.000525222	0.0194019	30666	0.0118277	0.0446439
NREAD_Pt_0_05	OD_PT50	rh_rostralanteriorcingulate	0.000299523	0.0205116	30666	0.0118277	0.0254595
PA_Pt_0_05	ICVF_PT50	Right_Thalamus_Proper	0.00279874	-0.0165384	30666	0.0118947	0.237893
NREAD_Pt_0_5	ISOVF_CT30	lh_caudalanteriorcingulate	0.000569916	-0.0179985	30666	0.0121107	0.0484429
DYS_Pt_0_001	OD_CT30	Left_Thalamus_Proper	0.00263707	0.0154599	30666	0.0125164	0.224151
DYS_Pt_0_001	OD_CT30	Brain_Stem	0.00262602	0.0169328	30666	0.0125164	0.223212
DYS_Pt_0_001	OD_CT30	lh_parsorbitalis	0.00294503	0.0165552	30666	0.0125164	0.250328
DYS_Pt_0_001	OD_CT30	lh_superiortemporal	0.00285606	0.0158894	30666	0.0125164	0.242765
DYS_Pt_0_001	OD_CT30	rh_caudalmiddlefrontal	0.00291121	0.0153913	30666	0.0125164	0.247453
DYS_Pt_0_001	OD_CT30	rh_precentral	0.002735	0.0158273	30666	0.0125164	0.232475
DYS_Pt_0_001	OD_CT30	rh_rostralanteriorcingulate	0.00250416	0.017093	30666	0.0125164	0.212854
WR_Pt_0_1	ISOVF_PT50	rh_inferiortemporal	0.00229182	-0.0161756	30666	0.0125171	0.194805
WR_Pt_0_1	ISOVF_PT50	rh_superiorparietal	0.00235615	-0.0156702	30666	0.0125171	0.200273
DYS_Pt_0_001	SC_PT50	lh_postcentral	0.000297834	-0.0166195	30666	0.0126579	0.0253159
DYS_Pt_0_001	SC_PT50	lh_rostralanteriorcingulate	0.000169242	-0.019919	30666	0.0126579	0.0143856	Volume
DYS_Pt_1	SC_PT50	Right_Pallidum	0.00152145	-0.0159092	30666	0.0130001	0.129323
DYS_Pt_1	SC_PT50	rh_postcentral	0.00152942	-0.0145624	30666	0.0130001	0.130001	Thickness
DYS_Pt_1	SC_PT50	rh_superiortemporal	0.00148996	-0.0153912	30666	0.0130001	0.126647	Volume, Thickness
DYS_Pt_5e05	OD_CT30	lh_rostralanteriorcingulate	0.000769328	0.0186639	30666	0.0130786	0.0653929
PA_Pt_0_05	ISOVF_PT50	Left_Putamen	0.00264685	-0.0151929	30666	0.0133381	0.224982
PA_Pt_0_05	ISOVF_PT50	lh_lateraloccipital	0.00217787	-0.0160333	30666	0.0133381	0.185119
PA_Pt_0_05	ISOVF_PT50	lh_parstriangularis	0.00266762	-0.0156122	30666	0.0133381	0.226748
PA_Pt_0_05	ISOVF_PT50	lh_precuneus	0.00229786	-0.0157983	30666	0.0133381	0.195318
PA_Pt_0_05	ISOVF_PT50	rh_isthmuscingulate	0.00236375	-0.015817	30666	0.0133381	0.200919
PA_Pt_0_05	ISOVF_PT50	rh_precuneus	0.00214659	-0.0156465	30666	0.0133381	0.18246
WR_Pt_1	ISOVF_PT50	Left_Hippocampus	0.00808818	-0.0145239	30666	0.0134803	0.687495
WR_Pt_0_05	ISOVF_PT50	lh_fusiform	0.00322489	-0.0157974	30666	0.0137058	0.274115
WR_Pt_0_05	ISOVF_PT50	lh_postcentral	0.0030655	-0.0157324	30666	0.0137058	0.260567
WR_Pt_0_5	ISOVF_PT50	lh_inferiorparietal	0.00643287	-0.0148134	30666	0.0137233	0.546794
WR_Pt_0_5	ISOVF_PT50	lh_supramarginal	0.00645801	-0.0148046	30666	0.0137233	0.548931
WR_Pt_0_5	ISOVF_PT50	rh_fusiform	0.0062543	-0.0147986	30666	0.0137233	0.531615
WR_Pt_0_05	ISOVF_CT30	Right_VentralDC	0.00553005	-0.0144288	30666	0.0138251	0.470054
PA_Pt_0_01	ICVF_CT30	lh_temporalpole	0.0123259	-0.0136796	30666	0.0139693	1
WR_Pt_0_1	ISOVF_CT30	Left_Pallidum	0.00658674	-0.0142265	30666	0.0140176	0.559873
WR_Pt_0_1	ISOVF_CT30	lh_posteriorcingulate	0.00659653	-0.0136799	30666	0.0140176	0.560705
DYS_Pt_e05	MD_PT50	rh_parsopercularis	0.000749415	-0.0177636	30666	0.0141532	0.0637003
DYS_Pt_e05	MD_PT50	rh_rostralanteriorcingulate	0.000832541	-0.0183511	30666	0.0141532	0.070766
PA_Pt_0_05	ICVF_PT50	Left_Thalamus_Proper	0.00485487	-0.0155756	30666	0.0144859	0.412664
PA_Pt_0_05	ICVF_PT50	lh_inferiorparietal	0.00423856	-0.015328	30666	0.0144859	0.360277
PA_Pt_0_05	ICVF_PT50	lh_lateraloccipital	0.00494224	-0.015311	30666	0.0144859	0.42009
PA_Pt_0_05	ICVF_PT50	lh_lateralorbitofrontal	0.00453867	-0.0154131	30666	0.0144859	0.385787
PA_Pt_0_05	ICVF_PT50	lh_parsopercularis	0.00467127	-0.0157231	30666	0.0144859	0.397058
PA_Pt_0_05	ICVF_PT50	lh_superiorfrontal	0.00464417	-0.0154271	30666	0.0144859	0.394755
PA_Pt_0_05	ICVF_PT50	rh_posteriorcingulate	0.00438156	-0.0156295	30666	0.0144859	0.372432
NREAD_Pt_0_05	MD_CT30	rh_precentral	0.00582741	-0.0141683	30666	0.0145685	0.49533
NREAD_Pt_0_05	MD_CT30	rh_rostralmiddlefrontal	0.00575675	-0.0140311	30666	0.0145685	0.489324
SP_Pt_0_1	ISOVF_PT50	Right_Caudate	0.000220702	-0.01972	30666	0.0149655	0.0187597
SP_Pt_0_1	ISOVF_PT50	lh_medialorbitofrontal	0.00035213	-0.0196816	30666	0.0149655	0.0299311
PA_Pt_0_05	ISOVF_CT30	lh_inferiorparietal	0.00715282	-0.0143359	30666	0.0151997	0.607989
DYS_Pt_0_1	SC_CT30	lh_inferiorparietal	0.00072188	-0.0164992	30666	0.0153399	0.0613598
DYS_Pt_0_1	SC_CT30	rh_precentral	0.000609115	-0.0164516	30666	0.0153399	0.0517748	Volume, Thickness
DYS_Pt_0_5	SC_CT30	Brain_Stem	0.00151987	-0.0174929	30666	0.0156567	0.129189	Volume
DYS_Pt_0_5	SC_CT30	Right_VentralDC	0.001326	-0.0176628	30666	0.0156567	0.11271	Volume
DYS_Pt_0_5	SC_CT30	lh_bankssts	0.00173759	-0.0165793	30666	0.0156567	0.147695
DYS_Pt_0_5	SC_CT30	rh_postcentral	0.00194802	-0.0141857	30666	0.0156567	0.165582	Thickness
DYS_Pt_0_5	SC_CT30	rh_superiorfrontal	0.00202617	-0.0135658	30666	0.0156567	0.172224
NREAD_Pt_1	ISOVF_CT30	lh_caudalanteriorcingulate	0.000604812	-0.0179154	30666	0.0156923	0.051409
NREAD_Pt_1	ISOVF_CT30	lh_paracentral	0.000460916	-0.0175718	30666	0.0156923	0.0391779
NREAD_Pt_1	ISOVF_CT30	lh_posteriorcingulate	0.000738462	-0.016953	30666	0.0156923	0.0627693
NREAD_Pt_1	ISOVF_CT30	rh_paracentral	0.000252836	-0.017881	30666	0.0156923	0.0214911
WR_Pt_0_1	ISOVF_PT50	lh_postcentral	0.0031648	-0.0157088	30666	0.015824	0.269008
DYS_Pt_e05	OD_CT30	lh_postcentral	0.00149256	0.0167656	30666	0.0158585	0.126868
DYS_Pt_0_001	SC_CT30	lh_postcentral	0.00037321	-0.0162811	30666	0.0158614	0.0317228
DYS_Pt_0_001	SC_CT30	lh_rostralanteriorcingulate	0.000254756	-0.0196154	30666	0.0158614	0.0216543	Volume
PA_Pt_0_01	ISOVF_PT50	lh_paracentral	0.00935739	-0.0134338	30666	0.0159076	0.795378
DYS_Pt_5e08	OD_CT30	Brain_Stem	0.00449779	0.0159872	30666	0.0159297	0.382312
DYS_Pt_0_05	FA_CT30	Left_VentralDC	0.000347525	-0.0199818	30666	0.0161344	0.0295396	Volume
DYS_Pt_0_05	FA_CT30	lh_precentral	0.000379632	-0.0199264	30666	0.0161344	0.0322687	Volume, Thickness
NREAD_Pt_5e05	OD_PT50	rh_precentral	0.000577833	0.0188523	30666	0.0163719	0.0491158
PA_Pt_0_05	ICVF_PT50	lh_lingual	0.0058491	-0.0148937	30666	0.0165724	0.497173
WR_Pt_0_5	ISOVF_CT30	lh_parstriangularis	0.00976597	-0.0134731	30666	0.0166022	0.830108
DYS_Pt_0_05	SC_PT50	rh_precentral	0.000783356	-0.0161346	30666	0.0166463	0.0665853	Volume, Thickness
DYS_Pt_5e05	MD_PT50	Right_Pallidum	0.000197951	-0.019325	30666	0.0168258	0.0168258
PA_Pt_e05	OD_CT30	rh_precuneus	0.000199286	0.0201386	30666	0.0169393	0.0169393
NREAD_Pt_0_1	OD_PT50	rh_rostralanteriorcingulate	0.000200046	0.0211217	30666	0.0170039	0.0170039
NREAD_Pt_0_1	OD_CT30	lh_lateraloccipital	0.000245998	0.0186444	30666	0.0174049	0.0209098
NREAD_Pt_0_1	OD_CT30	lh_rostralmiddlefrontal	0.000409527	0.0192211	30666	0.0174049	0.0348098
DYS_Pt_5e08	OD_CT30	Left_VentralDC	0.00517018	0.0142613	30666	0.0175786	0.439466
PA_Pt_0_05	ICVF_PT50	rh_precentral	0.00717977	-0.0151549	30666	0.0179494	0.61028
DYS_Pt_0_01	OD_CT30	rh_medialorbitofrontal	0.00151382	0.0174993	30666	0.0183821	0.128675
NREAD_Pt_0_05	OD_PT50	lh_rostralmiddlefrontal	0.00110432	0.0179051	30666	0.0187734	0.0938669
WR_Pt_0_5	ISOVF_PT50	lh_parsorbitalis	0.0111069	-0.0136725	30666	0.0188818	0.944088
DYS_Pt_0_1	SC_PT50	lh_inferiorparietal	0.00066984	-0.0167695	30666	0.0189756	0.0569364
DYS_Pt_0_1	SC_PT50	lh_pericalcarine	0.00133946	0.0165468	30666	0.0189756	0.113854
DYS_Pt_0_1	SC_PT50	rh_precentral	0.00118211	-0.0155843	30666	0.0189756	0.10048	Volume, Thickness
DYS_Pt_0_1	SC_PT50	rh_rostralanteriorcingulate	0.00129791	-0.0179169	30666	0.0189756	0.110322
DYS_Pt_0_001	OD_CT30	lh_lateraloccipital	0.00559272	0.014059	30666	0.0190153	0.475381
DYS_Pt_0_001	OD_CT30	rh_insula	0.00537716	0.0146228	30666	0.0190153	0.457059
WR_Pt_0_05	ISOVF_CT30	rh_parsorbitalis	0.00897783	-0.0142315	30666	0.0190779	0.763116
DYS_Pt_0_5	OD_CT30	lh_parstriangularis	0.000225511	0.0201891	30666	0.0191684	0.0191684
DYS_Pt_0_001	OD_CT30	lh_lateralorbitofrontal	0.00588669	0.014624	30666	0.0192449	0.500368
DYS_Pt_0_05	FA_PT50	lh_transversetemporal	0.000933918	-0.0186448	30666	0.0195062	0.079383
DYS_Pt_0_05	FA_PT50	rh_transversetemporal	0.00114742	-0.0184056	30666	0.0195062	0.097531	Volume
DYS_Pt_0_01	SC_PT50	lh_bankssts	0.000691194	-0.0180335	30666	0.0195838	0.0587515
WR_Pt_0_1	ISOVF_PT50	lh_inferiortemporal	0.00463134	-0.0150923	30666	0.0196832	0.393664
WR_Pt_0_05	ISOVF_PT50	Right_Amygdala	0.00591002	-0.0152402	30666	0.0201847	0.502352
WR_Pt_0_05	ISOVF_PT50	lh_lateraloccipital	0.00593666	-0.0144533	30666	0.0201847	0.504616
WR_Pt_1e05	ICVF_PT50	Right_Thalamus_Proper	0.000237583	-0.0203458	30666	0.0201946	0.0201946
DYS_Pt_0_001	OD_CT30	lh_rostralanteriorcingulate	0.00684395	0.015001	30666	0.0207763	0.581736	Volume
DYS_Pt_5e05	OD_CT30	lh_superiortemporal	0.00246722	0.0161322	30666	0.0209714	0.209714
PA_Pt_1	ICVF_CT30	lh_posteriorcingulate	0.000497909	-0.0192995	30666	0.0211611	0.0423223
PA_Pt_1	ICVF_CT30	lh_frontalpole	0.000372671	-0.0192575	30666	0.0211611	0.031677
PA_Pt_0_05	ISOVF_PT50	rh_caudalmiddlefrontal	0.00704527	-0.0137871	30666	0.0213874	0.598848
PA_Pt_0_05	ISOVF_PT50	rh_posteriorcingulate	0.00697601	-0.0140352	30666	0.0213874	0.592961
PA_Pt_1	ICVF_CT30	lh_medialorbitofrontal	0.00217013	-0.016781	30666	0.0217332	0.184461
PA_Pt_1	ICVF_CT30	lh_parstriangularis	0.00255685	-0.0162379	30666	0.0217332	0.217332
PA_Pt_1	ICVF_CT30	lh_superiorfrontal	0.00246323	-0.0164372	30666	0.0217332	0.209375
PA_Pt_1	ICVF_CT30	lh_superiorparietal	0.00228313	-0.0169208	30666	0.0217332	0.194066
PA_Pt_1	ICVF_CT30	rh_precentral	0.00236973	-0.0168251	30666	0.0217332	0.201427
PA_Pt_1	ICVF_CT30	rh_precuneus	0.00239807	-0.0168329	30666	0.0217332	0.203836
PA_Pt_1	ICVF_CT30	rh_rostralanteriorcingulate	0.00216492	-0.0169909	30666	0.0217332	0.184018
PA_Pt_1	ICVF_CT30	rh_frontalpole	0.00204168	-0.0167164	30666	0.0217332	0.173543
NREAD_Pt_0_05	ISOVF_CT30	rh_precentral	0.00435367	-0.0142963	30666	0.0217683	0.370062
PA_Pt_0_01	ISOVF_PT50	rh_inferiorparietal	0.0154913	-0.0127361	30666	0.0224926	1
PA_Pt_0_01	ISOVF_PT50	rh_parsorbitalis	0.0156125	-0.0128543	30666	0.0224926	1
DYS_Pt_1	SC_PT50	lh_pericalcarine	0.00371406	0.0149689	30666	0.0225497	0.315695	Area
DYS_Pt_1	SC_PT50	rh_rostralanteriorcingulate	0.00355764	-0.0162377	30666	0.0225497	0.302399
PA_Pt_0_05	ICVF_PT50	lh_superiortemporal	0.011214	-0.0140239	30666	0.0226949	0.953186
PA_Pt_0_05	ICVF_PT50	rh_inferiortemporal	0.0106777	-0.0140945	30666	0.0226949	0.907601
PA_Pt_0_05	ICVF_PT50	rh_parahippocampal	0.0107232	-0.0140308	30666	0.0226949	0.911475
PA_Pt_0_05	ICVF_PT50	rh_postcentral	0.0111515	-0.0140823	30666	0.0226949	0.947875
DYS_Pt_e05	MD_PT50	Left_Thalamus_Proper	0.0021444	-0.0153235	30666	0.0227843	0.182274
PA_Pt_0_1	ICVF_CT30	lh_rostralanteriorcingulate	0.018335	-0.0132526	30666	0.0229188	1
PA_Pt_1	ICVF_CT30	rh_cuneus	0.00836941	-0.0148024	30666	0.0229484	0.7114
PA_Pt_1	ICVF_CT30	rh_rostralmiddlefrontal	0.00813591	-0.0143215	30666	0.0229484	0.691553
DYS_Pt_0_05	FA_PT50	rh_bankssts	0.00163492	-0.0178357	30666	0.0231614	0.138968
WR_Pt_0_1	ISOVF_PT50	lh_lateraloccipital	0.00661769	-0.0142915	30666	0.0234377	0.562504
WR_Pt_0_1	ISOVF_PT50	rh_fusiform	0.00639186	-0.0147365	30666	0.0234377	0.543308
NREAD_Pt_0_05	OD_CT30	lh_lateralorbitofrontal	0.00155414	0.0168209	30666	0.0238645	0.132102
NREAD_Pt_0_05	OD_CT30	lh_middletemporal	0.00168455	0.0168598	30666	0.0238645	0.143187
NREAD_Pt_0_05	OD_CT30	lh_superiorfrontal	0.00101825	0.0174676	30666	0.0238645	0.086551
NREAD_Pt_0_05	OD_CT30	rh_medialorbitofrontal	0.00119128	0.017882	30666	0.0238645	0.101259
NREAD_Pt_0_05	SC_PT50	Left_Caudate	0.000443579	-0.0187078	30666	0.0239114	0.0377042
NREAD_Pt_0_05	SC_PT50	rh_pericalcarine	0.000562622	-0.0171336	30666	0.0239114	0.0478229
PA_Pt_0_05	ISOVF_CT30	Left_Pallidum	0.0141602	-0.0127682	30666	0.0240723	1
WR_Pt_0_5	ISOVF_PT50	rh_parsorbitalis	0.0161761	-0.0128891	30666	0.0241222	1
PA_Pt_0_01	ICVF_PT50	rh_middletemporal	0.0142361	-0.0134491	30666	0.0242013	1
PA_Pt_1	ICVF_CT30	lh_paracentral	0.00951925	-0.0144078	30666	0.0242467	0.809137
PA_Pt_1	ICVF_CT30	rh_paracentral	0.00969869	-0.014382	30666	0.0242467	0.824388
SP_Pt_0_05	ISOVF_PT50	lh_medialorbitofrontal	0.000577276	-0.0189387	30666	0.0245342	0.0490685
WR_Pt_1	ISOVF_CT30	Left_Amygdala	0.0174128	-0.0128762	30666	0.0246682	1
SP_Pt_5e05	OD_CT30	rh_lateraloccipital	0.000292988	0.018141	30666	0.024904	0.024904
WR_Pt_1	ISOVF_PT50	Left_Amygdala	0.0174137	-0.012727	30666	0.0249379	1
WR_Pt_1	ISOVF_PT50	Right_VentralDC	0.0176033	-0.0122462	30666	0.0249379	1
PA_Pt_0_01	ICVF_PT50	lh_parstriangularis	0.0151127	-0.0136573	30666	0.0251878	1
WR_Pt_1e05	ICVF_CT30	lh_frontalpole	0.0118634	-0.0136147	30666	0.0252097	1
PA_Pt_0_1	ICVF_CT30	lh_parahippocampal	0.0214787	-0.0121688	30666	0.0253568	1
NREAD_Pt_0_05	ISOVF_CT30	rh_middletemporal	0.00752007	-0.0140623	30666	0.0255682	0.639206
NREAD_Pt_0_05	OD_PT50	Left_Pallidum	0.00182116	0.0174555	30666	0.0257998	0.154799
PA_Pt_0_01	FA_PT50	Right_Hippocampus	0.000614778	-0.019343	30666	0.0261281	0.0522561
PA_Pt_0_01	FA_PT50	rh_supramarginal	0.000307563	-0.0203891	30666	0.0261281	0.0261429
DYS_Pt_0_01	OD_CT30	lh_superiorparietal	0.00246125	0.0160804	30666	0.0261508	0.209206
NREAD_Pt_0_1	ISOVF_PT50	Right_Caudate	0.000467237	-0.0186942	30666	0.0262059	0.0397151
NREAD_Pt_0_1	ISOVF_PT50	lh_lingual	0.000616609	-0.0186811	30666	0.0262059	0.0524118
WR_Pt_0_05	ISOVF_PT50	Left_Hippocampus	0.0123663	-0.013667	30666	0.0262784	1
WR_Pt_0_05	ISOVF_PT50	lh_middletemporal	0.0115438	-0.0132655	30666	0.0262784	0.981224
WR_Pt_0_05	ISOVF_PT50	lh_superiorfrontal	0.0122815	-0.0123663	30666	0.0262784	1
WR_Pt_0_05	ISOVF_PT50	rh_medialorbitofrontal	0.0122107	-0.0136944	30666	0.0262784	1
WR_Pt_0_1	ISOVF_PT50	lh_superiortemporal	0.0105681	-0.0137972	30666	0.0264203	0.898291
NREAD_Pt_5e05	OD_PT50	lh_postcentral	0.00124571	0.0174402	30666	0.0264714	0.105886
NREAD_Pt_5e05	OD_PT50	rh_middletemporal	0.00157405	0.0174494	30666	0.0267588	0.133794
DYS_Pt_0_05	FA_CT30	rh_precentral	0.000971037	-0.0186676	30666	0.0275127	0.0825381	Volume, Thickness
SP_Pt_1e05	OD_CT30	rh_lingual	0.00032656	0.018722	30666	0.0277576	0.0277576
DYS_Pt_0_1	SC_CT30	rh_rostralanteriorcingulate	0.00163372	-0.017617	30666	0.0277732	0.138866
NREAD_Pt_5e05	OD_PT50	lh_middletemporal	0.00262633	0.0162216	30666	0.0279048	0.223238
NREAD_Pt_5e05	OD_PT50	rh_isthmuscingulate	0.00221783	0.0168972	30666	0.0279048	0.188515
NREAD_Pt_5e05	OD_PT50	rh_supramarginal	0.00247267	0.0166377	30666	0.0279048	0.210177
PA_Pt_1	ICVF_CT30	rh_caudalanteriorcingulate	0.0130546	-0.0135619	30666	0.0279336	1
PA_Pt_1	ICVF_CT30	rh_caudalmiddlefrontal	0.0131452	-0.0134389	30666	0.0279336	1
NREAD_Pt_0_05	MD_CT30	lh_parsorbitalis	0.0164919	-0.0123342	30666	0.0280362	1
NREAD_Pt_0_05	MD_CT30	lh_paracentral	0.0168493	-0.0125785	30666	0.0280822	1
WR_Pt_0_1	ISOVF_PT50	rh_pericalcarine	0.0115826	-0.013712	30666	0.028129	0.984517
PA_Pt_e05	OD_CT30	lh_precuneus	0.000662763	0.0181349	30666	0.0281674	0.0563349
DYS_Pt_0_001	OD_CT30	rh_superiorfrontal	0.00996302	0.0136551	30666	0.0282286	0.846857
DYS_Pt_0_01	SC_PT50	lh_pericalcarine	0.00132845	0.0165337	30666	0.0282296	0.112919
DYS_Pt_5e08	SC_PT50	lh_rostralanteriorcingulate	0.000335503	-0.0189899	30666	0.0285178	0.0285178	Area
NREAD_Pt_0_05	ISOVF_CT30	Right_Putamen	0.00899625	-0.0131325	30666	0.0290339	0.764681
NREAD_Pt_0_05	ISOVF_CT30	lh_posteriorcingulate	0.0113185	-0.0126981	30666	0.0290339	0.962074
NREAD_Pt_0_05	ISOVF_CT30	lh_superiortemporal	0.010419	-0.0137266	30666	0.0290339	0.885616
NREAD_Pt_0_05	ISOVF_CT30	lh_insula	0.0093571	-0.0136771	30666	0.0290339	0.795354
NREAD_Pt_0_05	ISOVF_CT30	rh_caudalmiddlefrontal	0.0106497	-0.0125891	30666	0.0290339	0.905222
NREAD_Pt_0_05	ISOVF_CT30	rh_inferiortemporal	0.0116135	-0.0133595	30666	0.0290339	0.987151
NREAD_Pt_0_05	ISOVF_CT30	rh_lingual	0.0104543	-0.013497	30666	0.0290339	0.888619
NREAD_Pt_0_05	ISOVF_CT30	rh_parsopercularis	0.0107463	-0.012874	30666	0.0290339	0.913437
NREAD_Pt_0_05	ISOVF_CT30	rh_superiortemporal	0.0115471	-0.0133936	30666	0.0290339	0.981501
SP_Pt_1e05	OD_CT30	rh_entorhinal	0.000690953	0.0177214	30666	0.0293655	0.058731
DYS_Pt_5e08	MD_PT50	Left_Caudate	0.00148612	-0.0159589	30666	0.0294007	0.12632
DYS_Pt_5e08	MD_PT50	Left_VentralDC	0.00172945	-0.0160083	30666	0.0294007	0.147003
DYS_Pt_5e08	MD_PT50	Right_Pallidum	0.00118773	-0.0168247	30666	0.0294007	0.100957
DYS_Pt_5e08	MD_PT50	lh_insula	0.000801811	-0.0180965	30666	0.0294007	0.0681539	Area
DYS_Pt_5e08	MD_PT50	rh_lateralorbitofrontal	0.00153805	-0.0171824	30666	0.0294007	0.130734
DYS_Pt_5e08	MD_PT50	lh_parsorbitalis	0.00208499	-0.016448	30666	0.0295373	0.177224
PA_Pt_0_01	ISOVF_CT30	lh_medialorbitofrontal	0.0179899	-0.012985	30666	0.0299832	1
PA_Pt_0_01	ISOVF_CT30	rh_caudalmiddlefrontal	0.0178745	-0.0116534	30666	0.0299832	1
PA_Pt_0_5	ICVF_CT30	lh_insula	0.0115508	-0.013896	30666	0.0300275	0.981815
PA_Pt_0_5	ICVF_CT30	rh_cuneus	0.0117172	-0.0141487	30666	0.0300275	0.995965
PA_Pt_0_5	ICVF_CT30	rh_isthmuscingulate	0.0111778	-0.0140867	30666	0.0300275	0.95011
PA_Pt_0_5	ICVF_CT30	rh_paracentral	0.0109518	-0.0141464	30666	0.0300275	0.930902
PA_Pt_0_5	ICVF_CT30	rh_rostralmiddlefrontal	0.0108763	-0.0137807	30666	0.0300275	0.924486
PA_Pt_0_5	ICVF_CT30	rh_superiorparietal	0.00996945	-0.0143571	30666	0.0300275	0.847403
PA_Pt_0_5	ICVF_CT30	rh_superiortemporal	0.012011	-0.0138221	30666	0.0300275	1
NREAD_Pt_0_05	ISOVF_CT30	rh_isthmuscingulate	0.0124555	-0.0125337	30666	0.030249	1
WR_Pt_1e05	ICVF_CT30	lh_inferiorparietal	0.0178847	-0.0130378	30666	0.030404	1
WR_Pt_1e05	ICVF_CT30	lh_parsorbitalis	0.0173207	-0.012646	30666	0.030404	1
WR_Pt_1e05	ICVF_CT30	rh_parsorbitalis	0.0177085	-0.0128361	30666	0.030404	1
PA_Pt_0_5	ICVF_CT30	rh_lateralorbitofrontal	0.0125548	-0.01361	30666	0.0304903	1
NREAD_Pt_0_5	ISOVF_CT30	lh_precentral	0.00179789	-0.0160472	30666	0.0305641	0.152821
PA_Pt_e05	FA_PT50	rh_caudalanteriorcingulate	0.000361577	-0.0196957	30666	0.030734	0.030734
DYS_Pt_0_001	SC_CT30	lh_posteriorcingulate	0.00148262	-0.0167116	30666	0.0315056	0.126022
DYS_Pt_5e05	MD_PT50	Left_Thalamus_Proper	0.00149257	-0.0158533	30666	0.0320375	0.126869
DYS_Pt_5e05	MD_PT50	rh_medialorbitofrontal	0.00150765	-0.0171459	30666	0.0320375	0.12815
DYS_Pt_5e05	MD_PT50	rh_parstriangularis	0.000886713	-0.0179092	30666	0.0320375	0.0753706
DYS_Pt_1	OD_CT30	lh_parstriangularis	0.000384265	0.0194326	30666	0.0326625	0.0326625
WR_Pt_1	ISOVF_PT50	lh_pericalcarine	0.0271738	-0.0119857	30666	0.0339672	1
PA_Pt_1	ICVF_CT30	lh_supramarginal	0.0202465	-0.0128297	30666	0.034419	1
WR_Pt_0_05	ISOVF_PT50	Right_Putamen	0.01872	-0.0116782	30666	0.0345912	1
PA_Pt_0_01	ISOVF_PT50	lh_temporalpole	0.0278981	-0.0121169	30666	0.0348727	1
DYS_Pt_0_01	OD_CT30	rh_precentral	0.00577231	0.0145967	30666	0.0350461	0.490646	Volume, Thickness
DYS_Pt_0_001	FA_PT50	Right_Pallidum	0.000419429	-0.0194503	30666	0.0356515	0.0356515
DYS_Pt_e05	OD_CT30	Brain_Stem	0.00712765	0.0151533	30666	0.0357161	0.60585
DYS_Pt_e05	OD_CT30	Right_Caudate	0.00680221	0.0145587	30666	0.0357161	0.578188
DYS_Pt_e05	OD_CT30	lh_lateralorbitofrontal	0.00714322	0.014292	30666	0.0357161	0.607174
DYS_Pt_e05	OD_CT30	lh_superiorfrontal	0.0066687	0.0144161	30666	0.0357161	0.566839
DYS_Pt_5e08	MD_PT50	rh_precuneus	0.00433651	-0.0152803	30666	0.0368604	0.368604
WR_Pt_0_05	ISOVF_CT30	rh_isthmuscingulate	0.0217397	-0.01154	30666	0.0369575	1
DYS_Pt_0_05	SC_PT50	rh_superiortemporal	0.00436908	-0.0138061	30666	0.0371372	0.371372	Volume
WR_Pt_0_1	ISOVF_PT50	rh_lateralorbitofrontal	0.0175033	-0.0127546	30666	0.0371944	1
WR_Pt_0_1	ISOVF_PT50	rh_rostralmiddlefrontal	0.0172864	-0.0123905	30666	0.0371944	1
PA_Pt_e05	OD_CT30	lh_parsopercularis	0.00351522	0.0159543	30666	0.0373493	0.298794
PA_Pt_e05	OD_CT30	lh_temporalpole	0.0032422	0.0161569	30666	0.0373493	0.275587
PA_Pt_e05	OD_CT30	rh_entorhinal	0.00274999	0.0156416	30666	0.0373493	0.233749
PA_Pt_e05	OD_CT30	rh_inferiortemporal	0.0029977	0.0152677	30666	0.0373493	0.254804
PA_Pt_e05	OD_CT30	rh_medialorbitofrontal	0.00277637	0.0164797	30666	0.0373493	0.235991
NREAD_Pt_0_1	ISOVF_PT50	lh_pericalcarine	0.00132923	-0.0173237	30666	0.0376616	0.112985
DYS_Pt_0_001	OD_CT30	Right_Pallidum	0.0150877	0.012926	30666	0.0377193	1
DYS_Pt_0_001	OD_CT30	lh_insula	0.014693	0.0129858	30666	0.0377193	1	Volume
DYS_Pt_0_001	OD_CT30	rh_supramarginal	0.0155585	0.0127845	30666	0.0377848	1
PA_Pt_e05	OD_CT30	Right_VentralDC	0.00444156	0.0148725	30666	0.0379485	0.377533
PA_Pt_e05	OD_CT30	rh_posteriorcingulate	0.00446453	0.0158848	30666	0.0379485	0.379485
NREAD_Pt_0_01	ISOVF_CT30	rh_transversetemporal	0.000448799	-0.0190973	30666	0.0381479	0.0381479
WR_Pt_0_05	ISOVF_CT30	lh_superiortemporal	0.0236953	-0.0121528	30666	0.0394922	1
NREAD_Pt_0_1	SC_PT50	Right_Caudate	0.000939771	-0.0178811	30666	0.0399403	0.0798805
NREAD_Pt_0_1	SC_PT50	rh_pericalcarine	0.000471759	-0.0173885	30666	0.0399403	0.0400995
DYS_Pt_0_05	SC_CT30	lh_bankssts	0.00472294	-0.0149519	30666	0.0401449	0.401449
DYS_Pt_0_05	SC_CT30	rh_inferiorparietal	0.00391598	-0.0140719	30666	0.0401449	0.332858
DYS_Pt_0_05	SC_CT30	rh_rostralanteriorcingulate	0.00471037	-0.015803	30666	0.0401449	0.400382
DYS_Pt_0_05	SC_CT30	rh_superiortemporal	0.00463928	-0.0136615	30666	0.0401449	0.394339	Volume
NREAD_Pt_0_5	ISOVF_PT50	Right_Caudate	0.000483318	-0.0186598	30666	0.0403187	0.041082
NREAD_Pt_0_5	ISOVF_PT50	rh_paracentral	0.000948676	-0.0166874	30666	0.0403187	0.0806375
DYS_Pt_0_1	OD_CT30	lh_parstriangularis	0.000477145	0.0191184	30666	0.0405573	0.0405573
NREP_Pt_0_01	MD_PT50	lh_superiorparietal	0.000477474	-0.0191772	30666	0.0405853	0.0405853
NREAD_Pt_0_05	OD_PT50	rh_rostralmiddlefrontal	0.00389323	0.0158561	30666	0.0413656	0.330924
SP_Pt_0_05	ISOVF_PT50	lh_lingual	0.00195752	-0.0168629	30666	0.0415974	0.16639
SP_Pt_0_05	ISOVF_PT50	rh_insula	0.00152284	-0.0161427	30666	0.0415974	0.129441
DYS_Pt_0_01	OD_CT30	Right_Pallidum	0.00740829	0.0142565	30666	0.0419803	0.629705
PA_Pt_0_1	ICVF_PT50	rh_superiorfrontal	0.000494036	-0.0190805	30666	0.0419931	0.0419931
DYS_Pt_5e08	OD_CT30	lh_rostralmiddlefrontal	0.0162319	0.0130426	30666	0.0420805	1
DYS_Pt_5e08	OD_CT30	lh_transversetemporal	0.0168322	0.0132595	30666	0.0420805	1
DYS_Pt_5e08	OD_CT30	rh_paracentral	0.0165354	0.0131178	30666	0.0420805	1
DYS_Pt_5e05	MD_PT50	lh_parsorbitalis	0.00253192	-0.0161452	30666	0.0430426	0.215213
DYS_Pt_e05	MD_PT50	lh_middletemporal	0.0101794	-0.0131297	30666	0.0432624	0.865247
WR_Pt_0_1	ISOVF_CT30	rh_caudalanteriorcingulate	0.0254823	-0.0117278	30666	0.0433198	1
NREAD_Pt_1	ISOVF_CT30	lh_precentral	0.00258604	-0.0154897	30666	0.0439627	0.219813
DYS_Pt_0_01	OD_CT30	Right_Putamen	0.00992612	0.0131916	30666	0.0439871	0.84372
DYS_Pt_0_01	OD_CT30	lh_rostralanteriorcingulate	0.00978724	0.014343	30666	0.0439871	0.831915	Volume
DYS_Pt_0_01	OD_CT30	rh_caudalmiddlefrontal	0.0103499	0.0132686	30666	0.0439871	0.879742
DYS_Pt_0_01	OD_CT30	rh_cuneus	0.00881639	0.0144579	30666	0.0439871	0.749393	Thickness
DYS_Pt_0_01	OD_CT30	rh_parsorbitalis	0.00872039	0.0145807	30666	0.0439871	0.741233
PA_Pt_e05	OD_CT30	Right_Hippocampus	0.00813583	0.0134115	30666	0.0441983	0.691545
PA_Pt_e05	OD_CT30	lh_medialorbitofrontal	0.00800756	0.0143037	30666	0.0441983	0.680642
PA_Pt_e05	OD_CT30	lh_superiorparietal	0.00940695	0.0137711	30666	0.0441983	0.799591
PA_Pt_e05	OD_CT30	lh_insula	0.00975666	0.0137479	30666	0.0441983	0.829316
PA_Pt_e05	OD_CT30	rh_bankssts	0.00779441	0.0142397	30666	0.0441983	0.662525
PA_Pt_e05	OD_CT30	rh_middletemporal	0.0100036	0.0133651	30666	0.0441983	0.85031
PA_Pt_e05	OD_CT30	rh_rostralmiddlefrontal	0.00896167	0.0141875	30666	0.0441983	0.761742
PA_Pt_e05	OD_CT30	rh_superiorfrontal	0.0103996	0.0135697	30666	0.0441983	0.883966
NREAD_Pt_0_05	ISOVF_PT50	rh_postcentral	0.00891549	-0.0136956	30666	0.0445775	0.757817
DYS_Pt_0_5	SC_CT30	rh_parstriangularis	0.00751447	-0.0139484	30666	0.0456236	0.63873
NREAD_Pt_5e05	OD_CT30	lh_caudalmiddlefrontal	0.00186497	0.016013	30666	0.0462832	0.158522
NREAD_Pt_5e05	OD_CT30	lh_inferiortemporal	0.00187216	0.0166238	30666	0.0462832	0.159133
NREAD_Pt_5e05	OD_CT30	lh_postcentral	0.00055645	0.0181966	30666	0.0462832	0.0472983
NREAD_Pt_5e05	OD_CT30	rh_postcentral	0.00220653	0.0161867	30666	0.0462832	0.187555
NREAD_Pt_5e05	OD_CT30	rh_superiortemporal	0.00272254	0.0157285	30666	0.0462832	0.231416
PA_Pt_0_05	ISOVF_CT30	rh_transversetemporal	0.0356378	-0.011427	30666	0.0466033	1
PA_Pt_e05	OD_CT30	Left_Putamen	0.0131812	0.0126156	30666	0.0470437	1
PA_Pt_e05	OD_CT30	Brain_Stem	0.0185292	0.0132482	30666	0.0470437	1
PA_Pt_e05	OD_CT30	Right_Thalamus_Proper	0.016244	0.0122639	30666	0.0470437	1
PA_Pt_e05	OD_CT30	Right_Putamen	0.014028	0.0125502	30666	0.0470437	1
PA_Pt_e05	OD_CT30	Right_Pallidum	0.0125126	0.0132762	30666	0.0470437	1
PA_Pt_e05	OD_CT30	lh_caudalanteriorcingulate	0.0155082	0.0133814	30666	0.0470437	1
PA_Pt_e05	OD_CT30	lh_lateraloccipital	0.0158986	0.012229	30666	0.0470437	1
PA_Pt_e05	OD_CT30	lh_parstriangularis	0.0182456	0.0128818	30666	0.0470437	1
PA_Pt_e05	OD_CT30	lh_supramarginal	0.0175736	0.0126251	30666	0.0470437	1
PA_Pt_e05	OD_CT30	rh_caudalanteriorcingulate	0.0152935	0.0135964	30666	0.0470437	1
PA_Pt_e05	OD_CT30	rh_rostralanteriorcingulate	0.0178414	0.013389	30666	0.0470437	1
PA_Pt_e05	OD_CT30	rh_superiorparietal	0.0173159	0.0125686	30666	0.0470437	1
PA_Pt_e05	OD_CT30	rh_superiortemporal	0.0188175	0.0123314	30666	0.0470437	1
DYS_Pt_0_001	OD_CT30	lh_rostralmiddlefrontal	0.0217089	0.0124578	30666	0.0471314	1
DYS_Pt_0_001	OD_CT30	rh_cuneus	0.0221795	0.0126144	30666	0.0471314	1
DYS_Pt_0_001	OD_CT30	rh_postcentral	0.0220648	0.0121167	30666	0.0471314	1
DYS_Pt_0_05	FA_PT50	Right_Putamen	0.00499398	-0.0159683	30666	0.0471335	0.424488
DYS_Pt_0_05	FA_PT50	lh_bankssts	0.00554512	-0.0156227	30666	0.0471335	0.471335
DYS_Pt_0_05	FA_PT50	lh_superiortemporal	0.00479407	-0.0157204	30666	0.0471335	0.407496	Volume
NREAD_Pt_0_05	OD_CT30	rh_frontalpole	0.00396675	0.0161446	30666	0.0481677	0.337174
WR_Pt_0_5	ISOVF_PT50	lh_parstriangularis	0.0377524	-0.0108811	30666	0.0486206	1
WR_Pt_0_5	ISOVF_PT50	lh_posteriorcingulate	0.0400848	-0.0106412	30666	0.050106	1
NREAD_Pt_0_05	ISOVF_PT50	lh_pericalcarine	0.0118453	-0.0135686	30666	0.0503425	1
WR_Pt_0_001	ISOVF_CT30	lh_caudalanteriorcingulate	0.000967854	-0.0171831	30666	0.0504781	0.0822676
WR_Pt_0_001	ISOVF_CT30	rh_postcentral	0.00118772	-0.0163562	30666	0.0504781	0.100956
DYS_Pt_5e05	OD_CT30	Left_Amygdala	0.0101027	0.0134551	30666	0.0505134	0.858727
DYS_Pt_5e05	OD_CT30	lh_superiorparietal	0.00993929	0.0136821	30666	0.0505134	0.84484
DYS_Pt_e05	FA_PT50	Right_Pallidum	0.000595689	-0.018942	30666	0.0506336	0.0506336
DYS_Pt_0_01	SC_PT50	lh_inferiorparietal	0.00302429	-0.0145962	30666	0.0514129	0.257065	Thickness
DYS_Pt_5e08	MD_PT50	rh_parstriangularis	0.00970241	-0.0139263	30666	0.0515441	0.824705
DYS_Pt_e05	MD_PT50	rh_frontalpole	0.0146357	-0.0133357	30666	0.0518349	1
SP_Pt_1e05	OD_CT30	Left_Hippocampus	0.00305059	0.0150163	30666	0.05186	0.2593
SP_Pt_1e05	OD_CT30	rh_paracentral	0.00257648	0.0164885	30666	0.05186	0.219001
SP_Pt_1e05	OD_CT30	rh_superiorparietal	0.002488	0.0159712	30666	0.05186	0.21148
NREAD_Pt_0_05	OD_PT50	lh_superiorparietal	0.00612008	0.0148012	30666	0.0520207	0.520207
NREAD_Pt_0_05	OD_PT50	rh_parsorbitalis	0.00579162	0.0155327	30666	0.0520207	0.492287
DYS_Pt_1	SC_CT30	lh_superiortemporal	0.00981788	-0.0124674	30666	0.0521575	0.834519	Volume, Thickness
DYS_Pt_0_05	ICVF_PT50	Right_Pallidum	0.00245529	-0.0171321	30666	0.052175	0.2087
DYS_Pt_0_05	ICVF_PT50	lh_transversetemporal	0.00159611	-0.0176693	30666	0.052175	0.135669
DYS_Pt_0_05	ICVF_PT50	rh_parsopercularis	0.00222239	-0.0172035	30666	0.052175	0.188903
DYS_Pt_0_05	ICVF_PT50	rh_transversetemporal	0.00138499	-0.0180748	30666	0.052175	0.117724	Volume
PA_Pt_0_05	ICVF_PT50	rh_parstriangularis	0.0295649	-0.0122308	30666	0.0523544	1
PA_Pt_0_01	MD_CT30	rh_frontalpole	0.000617551	0.0181546	30666	0.0524918	0.0524918
NREAD_Pt_0_05	ISOVF_PT50	Right_Thalamus_Proper	0.0154787	-0.0118331	30666	0.0526891	1
NREAD_Pt_0_05	ISOVF_PT50	lh_cuneus	0.0154968	-0.0128844	30666	0.0526891	1
DYS_Pt_0_5	SC_PT50	Right_Thalamus_Proper	0.0101413	-0.0107866	30666	0.0538758	0.862013
PA_Pt_e05	OD_CT30	lh_parsorbitalis	0.0254162	0.0124383	30666	0.0540093	1
PA_Pt_0_5	ICVF_CT30	lh_inferiortemporal	0.043276	-0.0110667	30666	0.054095	1
NREAD_Pt_0_05	MD_CT30	rh_caudalanteriorcingulate	0.0395046	-0.0107219	30666	0.0541596	1
WR_Pt_0_001	SC_CT30	Right_Pallidum	0.000637359	0.0171389	30666	0.0541755	0.0541755
DYS_Pt_0_5	SC_CT30	Right_Thalamus_Proper	0.0101931	-0.0105277	30666	0.0549093	0.866414
DYS_Pt_0_5	SC_CT30	lh_caudalmiddlefrontal	0.0103359	-0.0129751	30666	0.0549093	0.878549
NREAD_Pt_5e05	OD_PT50	lh_fusiform	0.0111388	0.0138967	30666	0.0556942	0.946802
DYS_Pt_e05	MD_PT50	rh_rostralmiddlefrontal	0.0165546	-0.0130335	30666	0.0562855	1
WR_Pt_0_1	ISOVF_PT50	Left_Thalamus_Proper	0.0326519	-0.0103186	30666	0.0565804	1
WR_Pt_0_1	ISOVF_PT50	Right_VentralDC	0.0332826	-0.0109601	30666	0.0565804	1
DYS_Pt_0_5	SC_CT30	lh_parstriangularis	0.0119901	-0.0132198	30666	0.0566314	1
DYS_Pt_0_5	SC_CT30	lh_superiortemporal	0.0119925	-0.0121315	30666	0.0566314	1	Volume
DYS_Pt_0_001	OD_PT50	Left_Putamen	0.000666822	0.0176554	30666	0.0566799	0.0566799
NREAD_Pt_0_01	OD_PT50	Left_Caudate	0.00143654	0.0176431	30666	0.0567273	0.122106
NREAD_Pt_0_01	OD_PT50	lh_rostralmiddlefrontal	0.00231652	0.0167018	30666	0.0567273	0.196904
NREAD_Pt_0_01	OD_PT50	rh_lateralorbitofrontal	0.00266952	0.0167882	30666	0.0567273	0.226909
NREAD_Pt_0_01	OD_PT50	rh_rostralanteriorcingulate	0.00151952	0.0179705	30666	0.0567273	0.129159
PA_Pt_0_1	ISOVF_PT50	lh_medialorbitofrontal	0.000667865	-0.018706	30666	0.0567685	0.0567685
NREAD_Pt_0_5	ISOVF_CT30	Right_VentralDC	0.0197814	-0.012112	30666	0.0568269	1
NREAD_Pt_0_5	ISOVF_CT30	lh_bankssts	0.0223819	-0.0123083	30666	0.0568269	1
NREAD_Pt_0_5	ISOVF_CT30	lh_middletemporal	0.0227308	-0.0122045	30666	0.0568269	1
NREAD_Pt_0_5	ISOVF_CT30	lh_parsopercularis	0.0218944	-0.0117843	30666	0.0568269	1
NREAD_Pt_0_5	ISOVF_CT30	lh_superiorfrontal	0.021905	-0.0112149	30666	0.0568269	1
NREAD_Pt_0_5	ISOVF_CT30	lh_supramarginal	0.0218473	-0.012303	30666	0.0568269	1
PA_Pt_1	MD_PT50	rh_lingual	0.000671659	0.0190858	30666	0.057091	0.057091
PA_Pt_0_1	MD_PT50	lh_paracentral	0.00110901	0.0176315	30666	0.0577527	0.0942656
PA_Pt_0_1	MD_PT50	lh_superiorfrontal	0.00135889	0.0165131	30666	0.0577527	0.115505
PA_Pt_1	ICVF_CT30	lh_transversetemporal	0.0510085	-0.0108747	30666	0.0578096	1
PA_Pt_0_1	ICVF_PT50	Right_Hippocampus	0.00136027	-0.0181272	30666	0.0578113	0.115623
DYS_Pt_1	SC_CT30	rh_inferiortemporal	0.0115776	-0.0122914	30666	0.057888	0.984096	Thickness
PA_Pt_0_01	ISOVF_PT50	rh_cuneus	0.0478476	-0.010717	30666	0.0581007	1
NREAD_Pt_1	ISOVF_PT50	Right_Caudate	0.000847026	-0.0178435	30666	0.0581093	0.0719972
NREAD_Pt_1	ISOVF_PT50	rh_paracentral	0.00136728	-0.0161641	30666	0.0581093	0.116219
NREAD_Pt_0_1	SC_CT30	Left_Caudate	0.00205447	-0.0164149	30666	0.0582099	0.17463
NREAD_Pt_0_1	SC_CT30	Right_Caudate	0.00172006	-0.0169087	30666	0.0582099	0.146205
NREAD_Pt_0_1	SC_CT30	rh_medialorbitofrontal	0.0013592	-0.0164824	30666	0.0582099	0.115532
NREAD_Pt_0_05	MD_PT50	Right_Thalamus_Proper	0.00290687	-0.0153392	30666	0.0586901	0.247084
NREAD_Pt_0_05	MD_PT50	lh_precuneus	0.00345236	-0.0156194	30666	0.0586901	0.293451
WR_Pt_0_05	ISOVF_PT50	rh_lateraloccipital	0.0346282	-0.0113512	30666	0.0588679	1
DYS_Pt_e05	OD_CT30	Left_Caudate	0.0138527	0.0130758	30666	0.0588741	1
PA_Pt_0_05	ISOVF_CT30	lh_precentral	0.0471204	-0.0101699	30666	0.0589005	1
PA_Pt_e05	OD_PT50	rh_precuneus	0.000695532	0.0185102	30666	0.0591202	0.0591202
DYS_Pt_5e08	OD_CT30	rh_parstriangularis	0.0278594	0.0120639	30666	0.0592012	1
DYS_Pt_0_01	SC_CT30	lh_inferiorparietal	0.00348423	-0.0142345	30666	0.0592319	0.29616	Thickness
DYS_Pt_0_01	SC_CT30	rh_precentral	0.00287903	-0.0142838	30666	0.0592319	0.244718	Volume, Thickness
SP_Pt_0_05	ISOVF_PT50	rh_postcentral	0.00349334	-0.0152839	30666	0.0593867	0.296934
DYS_Pt_0_05	FA_CT30	rh_superiorparietal	0.010487	-0.0144353	30666	0.0594264	0.891396
DYS_Pt_0_001	SC_CT30	lh_bankssts	0.00351358	-0.0154124	30666	0.0597308	0.298654
WR_Pt_0_05	ISOVF_PT50	Left_Thalamus_Proper	0.0358872	-0.0101159	30666	0.059812	1
PA_Pt_1	MD_PT50	lh_superiorfrontal	0.00141186	0.0164656	30666	0.0600038	0.120008
DYS_Pt_0_05	FA_CT30	lh_superiorparietal	0.0113086	-0.0142173	30666	0.060077	0.961232
NREAD_Pt_0_05	OD_CT30	lh_inferiortemporal	0.00707287	0.014426	30666	0.0601194	0.601194
PA_Pt_0_01	ISOVF_CT30	rh_precentral	0.0425055	-0.0101538	30666	0.0602162	1
WR_Pt_1e05	ICVF_CT30	lh_bankssts	0.0453452	-0.0109854	30666	0.0602241	1
PA_Pt_0_01	OD_PT50	Right_Hippocampus	0.000711271	-0.0188589	30666	0.060458	0.060458
DYS_Pt_5e08	MD_PT50	Right_VentralDC	0.0120926	-0.0132658	30666	0.0604632	1
NREAD_Pt_0_01	MD_CT30	rh_transversetemporal	0.000712339	-0.0186293	30666	0.0605488	0.0605488
DYS_Pt_0_5	SC_PT50	lh_parstriangularis	0.0121105	-0.013159	30666	0.0605527	1
WR_Pt_1e05	ICVF_PT50	lh_lingual	0.0142832	-0.0132472	30666	0.0607034	1
WR_Pt_0_5	ISOVF_PT50	Brain_Stem	0.0512129	-0.0107097	30666	0.0607124	1
WR_Pt_0_5	ISOVF_PT50	rh_parstriangularis	0.0514269	-0.0100701	30666	0.0607124	1
WR_Pt_0_5	ISOVF_CT30	Right_Hippocampus	0.0442919	-0.0107531	30666	0.0607228	1
NREAD_Pt_5e05	OD_CT30	lh_precentral	0.00500753	0.0146627	30666	0.0608057	0.42564
NREAD_Pt_5e05	OD_CT30	rh_precentral	0.00471066	0.0149173	30666	0.0608057	0.400406
DYS_Pt_0_05	FA_CT30	lh_middletemporal	0.0124601	-0.013893	30666	0.0611183	1
DYS_Pt_0_05	FA_CT30	rh_insula	0.0129427	-0.0141789	30666	0.0611183	1
DYS_Pt_5e05	OD_CT30	lh_parstriangularis	0.0145295	0.0133476	30666	0.0617505	1
DYS_Pt_5e05	OD_CT30	rh_supramarginal	0.0144763	0.0129271	30666	0.0617505	1
PA_Pt_5e05	OD_CT30	Left_VentralDC	0.000727067	0.0172361	30666	0.0618007	0.0618007
NREAD_Pt_0_05	OD_CT30	Left_Caudate	0.00815267	0.0140645	30666	0.062242	0.692977
NREAD_Pt_0_05	OD_CT30	lh_superiorparietal	0.0087871	0.0139167	30666	0.062242	0.746903
NREAD_Pt_0_1	SC_PT50	rh_medialorbitofrontal	0.00222878	-0.0157833	30666	0.0631486	0.189446
DYS_Pt_e05	OD_CT30	lh_superiortemporal	0.0186909	0.0125339	30666	0.0635492	1
SP_Pt_1e05	SC_CT30	lh_parsopercularis	0.000748768	-0.0173908	30666	0.0636453	0.0636453
PA_Pt_0_05	ICVF_PT50	Brain_Stem	0.0374959	-0.0116484	30666	0.0637431	1
NREAD_Pt_0_05	ISOVF_PT50	rh_parahippocampal	0.0227893	-0.0126919	30666	0.0645697	1
NREAD_Pt_0_05	ISOVF_PT50	rh_superiorfrontal	0.0226348	-0.0112788	30666	0.0645697	1
NREAD_Pt_0_1	ISOVF_PT50	lh_precentral	0.0117777	-0.0130311	30666	0.0648229	1
NREAD_Pt_0_1	ISOVF_PT50	lh_superiorparietal	0.0122019	-0.0131999	30666	0.0648229	1
DYS_Pt_1	SC_PT50	lh_superiortemporal	0.0130102	-0.0120358	30666	0.065051	1	Volume, Thickness
DYS_Pt_5e05	OD_CT30	lh_lateraloccipital	0.0160793	0.0122184	30666	0.0650828	1
NREAD_Pt_0_1	SC_CT30	rh_pericalcarine	0.00306391	-0.0145459	30666	0.0651082	0.260433
SP_Pt_1e05	OD_CT30	rh_lateraloccipital	0.00770961	0.0133474	30666	0.0655317	0.655317
NREAD_Pt_0_5	ISOVF_CT30	lh_superiortemporal	0.0312129	-0.0115665	30666	0.0663273	1
DYS_Pt_1	SC_CT30	lh_parstriangularis	0.0158399	-0.0126933	30666	0.0673194	1
NREAD_Pt_0_1	ISOVF_CT30	rh_superiortemporal	0.0269904	-0.011742	30666	0.0674761	1
WR_Pt_0_5	ISOVF_CT30	lh_isthmuscingulate	0.0509441	-0.0100716	30666	0.0676601	1
DYS_Pt_5e05	MD_PT50	lh_parstriangularis	0.00627469	-0.0146178	30666	0.0681272	0.533349
DYS_Pt_5e05	MD_PT50	lh_precentral	0.00641197	-0.0146855	30666	0.0681272	0.545017
DYS_Pt_0_05	FA_CT30	Right_VentralDC	0.0187774	-0.0134166	30666	0.0684643	1	Volume
DYS_Pt_0_05	FA_CT30	lh_insula	0.0193311	-0.0131728	30666	0.0684643	1
DYS_Pt_0_05	FA_CT30	rh_caudalanteriorcingulate	0.0192976	-0.0131346	30666	0.0684643	1
DYS_Pt_0_05	FA_CT30	rh_superiorfrontal	0.0181801	-0.0128649	30666	0.0684643	1
DYS_Pt_0_05	FA_CT30	rh_transversetemporal	0.0178715	-0.0135185	30666	0.0684643	1	Volume
PA_Pt_5e05	ISOVF_PT50	lh_caudalanteriorcingulate	0.000815923	-0.0173862	30666	0.0693535	0.0693535
WR_Pt_1e05	ICVF_CT30	lh_lateraloccipital	0.0531252	-0.0106207	30666	0.0694714	1
SP_Pt_0_05	OD_PT50	Right_Caudate	0.00081771	-0.0181436	30666	0.0695053	0.0695053
DYS_Pt_5e08	OD_PT50	lh_caudalmiddlefrontal	0.00821377	0.0142669	30666	0.069817	0.69817
NREAD_Pt_5e05	OD_PT50	lh_rostralmiddlefrontal	0.0157053	0.0132325	30666	0.0702607	1
NREAD_Pt_5e05	OD_PT50	rh_caudalmiddlefrontal	0.0155604	0.0130446	30666	0.0702607	1
PA_Pt_0_05	ISOVF_PT50	rh_cuneus	0.0562908	-0.0103395	30666	0.0703635	1
WR_Pt_0_01	SC_CT30	rh_cuneus	0.000833434	-0.0174669	30666	0.0708419	0.0708419
NREAD_Pt_5e05	OD_PT50	Left_Putamen	0.0166882	0.0124084	30666	0.0709251	1
NREAD_Pt_0_01	OD_PT50	Left_Putamen	0.00420431	0.0148525	30666	0.0714733	0.357366
DYS_Pt_0_01	FA_PT50	lh_middletemporal	0.0042287	-0.0153206	30666	0.0718879	0.359439
DYS_Pt_0_01	FA_PT50	lh_rostralanteriorcingulate	0.00113026	-0.0177639	30666	0.0718879	0.0960724	Volume
DYS_Pt_0_01	FA_PT50	lh_transversetemporal	0.00325075	-0.0165582	30666	0.0718879	0.276314	Thickness
DYS_Pt_0_01	FA_PT50	rh_rostralanteriorcingulate	0.00342452	-0.0162813	30666	0.0718879	0.291085
DYS_Pt_0_01	FA_PT50	rh_transversetemporal	0.00366498	-0.0164267	30666	0.0718879	0.311524	Volume
NREAD_Pt_0_05	OD_PT50	lh_middletemporal	0.0101543	0.0138877	30666	0.0719263	0.863116
NREAD_Pt_0_05	OD_PT50	rh_lateraloccipital	0.00965267	0.0145354	30666	0.0719263	0.820477
DYS_Pt_0_01	SC_PT50	rh_inferiorparietal	0.00677532	-0.0132679	30666	0.0719878	0.575902	Volume
PA_Pt_0_1	ISOVF_PT50	lh_lingual	0.00260314	-0.0163844	30666	0.0721317	0.221267
PA_Pt_0_1	ISOVF_PT50	lh_parahippocampal	0.00424304	-0.0160231	30666	0.0721317	0.360658
PA_Pt_0_1	ISOVF_PT50	rh_lateralorbitofrontal	0.00195277	-0.016529	30666	0.0721317	0.165985
PA_Pt_0_1	ISOVF_PT50	rh_medialorbitofrontal	0.00374643	-0.0157764	30666	0.0721317	0.318447
NREAD_Pt_1	ISOVF_PT50	Right_Thalamus_Proper	0.00426886	-0.0139942	30666	0.0725706	0.362853
NREAD_Pt_1	ISOVF_PT50	lh_lingual	0.00298218	-0.0162141	30666	0.0725706	0.253485
NREAD_Pt_1	ISOVF_PT50	lh_precentral	0.00424021	-0.0148068	30666	0.0725706	0.360418
SP_Pt_1e05	OD_CT30	lh_rostralanteriorcingulate	0.00940915	0.0143952	30666	0.072707	0.799777
NREP_Pt_0_5	FA_CT30	lh_paracentral	0.00820412	0.0149596	30666	0.0727298	0.69735
NREP_Pt_0_5	FA_CT30	lh_precentral	0.00855644	0.0147453	30666	0.0727298	0.727298
NREP_Pt_0_5	FA_CT30	lh_supramarginal	0.00685239	0.0153322	30666	0.0727298	0.582453
SP_Pt_1e05	SC_PT50	lh_parsopercularis	0.000871568	-0.0170991	30666	0.0740833	0.0740833
DYS_Pt_5e05	OD_CT30	lh_caudalmiddlefrontal	0.0204068	0.0119504	30666	0.0754164	1
WR_Pt_0_1	ISOVF_CT30	lh_caudalanteriorcingulate	0.0532443	-0.010123	30666	0.0754295	1
NREAD_Pt_0_05	ISOVF_PT50	lh_insula	0.0285845	-0.0115085	30666	0.0759275	1
NREAD_Pt_0_1	ISOVF_PT50	rh_lingual	0.0152811	-0.0130429	30666	0.0764055	1
PA_Pt_e05	OD_CT30	rh_temporalpole	0.0434927	0.0109663	30666	0.0770183	1
DYS_Pt_0_05	FA_PT50	lh_caudalmiddlefrontal	0.0154273	-0.0132018	30666	0.0771365	1
DYS_Pt_0_05	FA_PT50	lh_rostralanteriorcingulate	0.0150232	-0.013285	30666	0.0771365	1
DYS_Pt_0_05	FA_PT50	rh_parstriangularis	0.0146457	-0.0137273	30666	0.0771365	1
PA_Pt_e05	ISOVF_PT50	lh_precuneus	0.00304672	-0.0153542	30666	0.0771597	0.258971
PA_Pt_e05	ISOVF_PT50	rh_caudalanteriorcingulate	0.00112472	-0.017285	30666	0.0771597	0.0956014
PA_Pt_e05	ISOVF_PT50	rh_caudalmiddlefrontal	0.00329744	-0.0150349	30666	0.0771597	0.280282
PA_Pt_e05	ISOVF_PT50	rh_inferiorparietal	0.00363105	-0.0153048	30666	0.0771597	0.308639
SP_Pt_0_1	ISOVF_PT50	rh_medialorbitofrontal	0.00359399	-0.0158753	30666	0.0771925	0.305489
SP_Pt_0_1	ISOVF_PT50	rh_insula	0.00363259	-0.0148242	30666	0.0771925	0.30877
NREAD_Pt_0_05	OD_PT50	lh_parsorbitalis	0.0181855	0.0132641	30666	0.0772885	1
NREAD_Pt_0_05	OD_PT50	rh_superiorfrontal	0.0173564	0.0129774	30666	0.0772885	1
NREAD_Pt_0_05	ICVF_PT50	rh_lateralorbitofrontal	0.00181946	0.0173446	30666	0.077327	0.154654
NREAD_Pt_0_05	ICVF_PT50	rh_rostralanteriorcingulate	0.00164491	0.0176667	30666	0.077327	0.139817
DYS_Pt_0_5	SC_PT50	rh_inferiortemporal	0.0183361	-0.0115654	30666	0.0779282	1	Thickness
DYS_Pt_0_5	SC_CT30	Left_Pallidum	0.0218182	-0.0120206	30666	0.078223	1
DYS_Pt_0_5	SC_CT30	lh_superiorfrontal	0.0226813	-0.0100593	30666	0.078223	1
DYS_Pt_0_5	SC_CT30	rh_caudalanteriorcingulate	0.0205383	-0.0130279	30666	0.078223	1
DYS_Pt_0_5	SC_CT30	rh_inferiortemporal	0.0230068	-0.0110685	30666	0.078223	1	Thickness
NREAD_Pt_0_05	ISOVF_PT50	lh_lateraloccipital	0.0304835	-0.0113379	30666	0.0782739	1
NREAD_Pt_0_05	ISOVF_PT50	rh_fusiform	0.0313096	-0.0115845	30666	0.0782739	1
NREP_Pt_1	FA_CT30	lh_lateraloccipital	0.00739166	0.014646	30666	0.0785364	0.628291
NREP_Pt_1	FA_CT30	lh_middletemporal	0.00683653	0.0150447	30666	0.0785364	0.581105
NREP_Pt_1	FA_CT30	lh_supramarginal	0.00644819	0.0154514	30666	0.0785364	0.548096
NREP_Pt_1	FA_CT30	rh_inferiortemporal	0.00495049	0.0155837	30666	0.0785364	0.420792
NREP_Pt_1	FA_CT30	rh_middletemporal	0.00649996	0.0151834	30666	0.0785364	0.552497
DYS_Pt_0_1	SC_CT30	Right_Pallidum	0.00841393	-0.0132587	30666	0.0794649	0.715184
DYS_Pt_0_1	SC_CT30	Right_VentralDC	0.00774064	-0.0146516	30666	0.0794649	0.657954	Volume
DYS_Pt_5e08	ICVF_CT30	lh_bankssts	0.0290807	0.0119757	30666	0.0795764	1
DYS_Pt_5e08	ICVF_CT30	lh_parsorbitalis	0.0308669	0.0114689	30666	0.0795764	1
DYS_Pt_5e08	ICVF_CT30	rh_caudalmiddlefrontal	0.0282413	0.0118852	30666	0.0795764	1
DYS_Pt_5e08	ICVF_CT30	rh_superiorfrontal	0.0310567	0.0116513	30666	0.0795764	1
DYS_Pt_5e08	ICVF_CT30	rh_superiorparietal	0.0318306	0.0119561	30666	0.0795764	1
DYS_Pt_5e08	ICVF_CT30	rh_temporalpole	0.0291055	0.0119456	30666	0.0795764	1
DYS_Pt_1	SC_PT50	lh_superiorfrontal	0.0188429	-0.0103785	30666	0.0800825	1
DYS_Pt_5e05	OD_CT30	Brain_Stem	0.0233022	0.0127728	30666	0.0801197	1
DYS_Pt_5e05	OD_CT30	lh_parsorbitalis	0.0235646	0.0126111	30666	0.0801197	1
DYS_Pt_5e08	MD_PT50	rh_parsorbitalis	0.0188698	-0.0126581	30666	0.0801965	1
DYS_Pt_0_05	OD_PT50	lh_pericalcarine	0.000950166	0.0181781	30666	0.0807641	0.0807641
WR_Pt_1e05	ICVF_CT30	rh_middletemporal	0.064678	-0.0101648	30666	0.0808474	1
SP_Pt_0_05	ISOVF_PT50	Right_VentralDC	0.0208171	-0.0118398	30666	0.0817023	1
SP_Pt_0_05	ISOVF_PT50	lh_cuneus	0.0194265	-0.0124324	30666	0.0817023	1
SP_Pt_0_05	ISOVF_PT50	lh_parahippocampal	0.0249913	-0.0125705	30666	0.0817023	1
SP_Pt_0_05	ISOVF_PT50	lh_parsorbitalis	0.0149127	-0.0130209	30666	0.0817023	1
SP_Pt_0_05	ISOVF_PT50	lh_parstriangularis	0.0225542	-0.0118666	30666	0.0817023	1
SP_Pt_0_05	ISOVF_PT50	lh_pericalcarine	0.0171179	-0.0128452	30666	0.0817023	1
SP_Pt_0_05	ISOVF_PT50	lh_postcentral	0.0228132	-0.0120563	30666	0.0817023	1
SP_Pt_0_05	ISOVF_PT50	rh_cuneus	0.0248364	-0.0121658	30666	0.0817023	1
SP_Pt_0_05	ISOVF_PT50	rh_medialorbitofrontal	0.018432	-0.0128373	30666	0.0817023	1
SP_Pt_0_05	ISOVF_PT50	rh_paracentral	0.0160396	-0.0121262	30666	0.0817023	1
SP_Pt_0_05	ISOVF_PT50	rh_parsorbitalis	0.0247161	-0.011952	30666	0.0817023	1
SP_Pt_0_05	ISOVF_PT50	rh_pericalcarine	0.0188674	-0.0126888	30666	0.0817023	1
SP_Pt_0_05	ISOVF_PT50	rh_superiorparietal	0.0232695	-0.0116321	30666	0.0817023	1
PA_Pt_0_1	ISOVF_CT30	lh_cuneus	0.00274914	-0.0155646	30666	0.0818396	0.233676
PA_Pt_0_1	ISOVF_CT30	lh_lingual	0.00358727	-0.0150345	30666	0.0818396	0.304918
PA_Pt_0_1	ISOVF_CT30	rh_lateralorbitofrontal	0.00385128	-0.0155994	30666	0.0818396	0.327358
PA_Pt_0_1	ISOVF_CT30	rh_medialorbitofrontal	0.00268933	-0.0163256	30666	0.0818396	0.228593
NREAD_Pt_1	OD_PT50	rh_rostralanteriorcingulate	0.000970352	0.0187519	30666	0.0824799	0.0824799
SP_Pt_1	ISOVF_PT50	Right_Caudate	0.00333739	-0.0156774	30666	0.0824832	0.283678
SP_Pt_1	ISOVF_PT50	lh_lingual	0.00520325	-0.0152409	30666	0.0824832	0.442276
SP_Pt_1	ISOVF_PT50	lh_medialorbitofrontal	0.00260008	-0.0165965	30666	0.0824832	0.221007
SP_Pt_1	ISOVF_PT50	rh_postcentral	0.00582234	-0.0144544	30666	0.0824832	0.494899
SP_Pt_1	ISOVF_PT50	rh_supramarginal	0.00435552	-0.0149414	30666	0.0824832	0.370219
SP_Pt_1	ISOVF_PT50	rh_insula	0.00431417	-0.0145571	30666	0.0824832	0.366704
NREAD_Pt_0_1	ISOVF_CT30	rh_pericalcarine	0.0379889	-0.0109165	30666	0.0827964	1
DYS_Pt_5e08	OD_PT50	lh_cuneus	0.0114021	0.0141548	30666	0.0832134	0.969175
DYS_Pt_5e08	OD_PT50	rh_supramarginal	0.0117478	0.0138599	30666	0.0832134	0.998561
SP_Pt_1	ISOVF_PT50	rh_pericalcarine	0.00697633	-0.0146026	30666	0.0847125	0.592988
DYS_Pt_0_1	OD_CT30	lh_parsorbitalis	0.00199554	0.017252	30666	0.0848104	0.169621
NREAD_Pt_0_1	ISOVF_CT30	rh_fusiform	0.0399365	-0.0111518	30666	0.0848651	1
DYS_Pt_5e08	MD_CT30	Left_Thalamus_Proper	0.00451245	-0.0137148	30666	0.0853612	0.383558	Volume
DYS_Pt_5e08	MD_CT30	Left_Caudate	0.00647412	-0.0132293	30666	0.0853612	0.5503
DYS_Pt_5e08	MD_CT30	Left_VentralDC	0.008034	-0.0132785	30666	0.0853612	0.68289
DYS_Pt_5e08	MD_CT30	lh_parsorbitalis	0.0030552	-0.015217	30666	0.0853612	0.259692
DYS_Pt_5e08	MD_CT30	lh_parstriangularis	0.007589	-0.0136011	30666	0.0853612	0.645065
DYS_Pt_5e08	MD_CT30	lh_rostralanteriorcingulate	0.00770215	-0.0140508	30666	0.0853612	0.654683	Area
DYS_Pt_5e08	MD_CT30	rh_precuneus	0.00351846	-0.0152658	30666	0.0853612	0.299069
DYS_Pt_5e08	MD_CT30	rh_rostralanteriorcingulate	0.00194595	-0.0163887	30666	0.0853612	0.165405
DYS_Pt_5e08	MD_PT50	lh_lateralorbitofrontal	0.025287	-0.0122316	30666	0.0859759	1
NREAD_Pt_0_05	OD_CT30	Left_Putamen	0.0160279	0.0122758	30666	0.0859885	1
NREAD_Pt_0_05	OD_CT30	lh_inferiorparietal	0.0171977	0.0128751	30666	0.0859885	1
NREAD_Pt_0_05	OD_CT30	rh_superiortemporal	0.0171252	0.0125342	30666	0.0859885	1
PA_Pt_e05	OD_CT30	lh_superiorfrontal	0.0509136	0.0103635	30666	0.0865531	1
PA_Pt_e05	OD_CT30	rh_insula	0.0507697	0.0102573	30666	0.0865531	1
WR_Pt_1e05	ICVF_PT50	lh_precuneus	0.0256058	-0.0122521	30666	0.0870597	1
WR_Pt_1e05	ICVF_PT50	rh_parstriangularis	0.0247148	-0.0126309	30666	0.0870597	1
PA_Pt_5e05	SC_CT30	Left_Amygdala	0.00204941	-0.0165246	30666	0.0871	0.1742
PA_Pt_5e05	SC_CT30	rh_parsopercularis	0.00114169	-0.0169442	30666	0.0871	0.0970436
DYS_Pt_e05	OD_CT30	lh_inferiorparietal	0.0325439	0.0115459	30666	0.0873758	1
DYS_Pt_e05	OD_CT30	rh_parsorbitalis	0.0348972	0.0117225	30666	0.0873758	1
DYS_Pt_e05	OD_CT30	rh_rostralanteriorcingulate	0.033198	0.0120492	30666	0.0873758	1
DYS_Pt_e05	OD_CT30	rh_superiorparietal	0.0349503	0.0111488	30666	0.0873758	1
SP_Pt_0_05	SC_PT50	rh_fusiform	0.00102841	-0.0167761	30666	0.0874153	0.0874153
DYS_Pt_0_001	SC_PT50	lh_bankssts	0.00413236	-0.0152283	30666	0.0878127	0.351251
DYS_Pt_0_001	SC_PT50	lh_posteriorcingulate	0.0051761	-0.0149341	30666	0.0879937	0.439968
DYS_Pt_0_05	FA_CT30	rh_parstriangularis	0.0415531	-0.0110674	30666	0.0883003	1
DYS_Pt_1	SC_CT30	Left_Pallidum	0.0259709	-0.0116691	30666	0.0883012	1
DYS_Pt_1	SC_CT30	rh_rostralmiddlefrontal	0.0251083	-0.0105531	30666	0.0883012	1
WR_Pt_1	ISOVF_CT30	lh_pericalcarine	0.0714258	-0.00940686	30666	0.0892823	1
SP_Pt_0_05	ISOVF_CT30	rh_postcentral	0.00105358	-0.0165364	30666	0.0895543	0.0895543
PA_Pt_e05	OD_PT50	Right_Hippocampus	0.00380933	0.0161226	30666	0.0896483	0.323793
PA_Pt_e05	OD_PT50	lh_precuneus	0.00363381	0.0156163	30666	0.0896483	0.308874
PA_Pt_e05	OD_PT50	rh_parstriangularis	0.00421874	0.0161897	30666	0.0896483	0.358593
DYS_Pt_0_001	OD_CT30	rh_superiortemporal	0.0475457	0.0104064	30666	0.0898086	1	Volume
DYS_Pt_0_1	SC_CT30	rh_frontalpole	0.014828	-0.0133974	30666	0.0900274	1
DYS_Pt_0_5	FA_PT50	Right_Pallidum	0.00132763	-0.017745	30666	0.0902337	0.112848
DYS_Pt_0_5	FA_PT50	rh_parsopercularis	0.00212315	-0.0171908	30666	0.0902337	0.180467
NREAD_Pt_0_1	ISOVF_PT50	Right_Thalamus_Proper	0.0214859	-0.0112516	30666	0.0913151	1
NREAD_Pt_0_1	ISOVF_PT50	rh_postcentral	0.0214054	-0.0120627	30666	0.0913151	1
PA_Pt_e05	OD_PT50	Left_Thalamus_Proper	0.00799684	0.0138621	30666	0.091452	0.679732
PA_Pt_e05	OD_PT50	Right_VentralDC	0.00860725	0.0144393	30666	0.091452	0.731616
PA_Pt_e05	OD_PT50	lh_parahippocampal	0.00685557	0.0151904	30666	0.091452	0.582723
PA_Pt_e05	OD_PT50	lh_superiorfrontal	0.00774468	0.0145625	30666	0.091452	0.658298
NREAD_Pt_0_5	ISOVF_PT50	rh_fusiform	0.024749	-0.0121034	30666	0.0914637	1
SP_Pt_0_5	ISOVF_PT50	rh_caudalanteriorcingulate	0.0215765	-0.0122218	30666	0.0917003	1
NREAD_Pt_0_5	ISOVF_PT50	lh_middletemporal	0.0268596	-0.0116179	30666	0.0917671	1
NREAD_Pt_0_5	ISOVF_PT50	lh_superiorparietal	0.0269903	-0.0116571	30666	0.0917671	1
DYS_Pt_5e08	ICVF_CT30	Left_Accumbens_area	0.0532356	0.0107652	30666	0.0919804	1
DYS_Pt_5e08	ICVF_CT30	rh_lateralorbitofrontal	0.0529006	0.0105515	30666	0.0919804	1
DYS_Pt_5e08	ICVF_CT30	rh_parstriangularis	0.0534681	0.010459	30666	0.0919804	1
DYS_Pt_5e08	ICVF_CT30	rh_rostralmiddlefrontal	0.0541061	0.0104193	30666	0.0919804	1
DYS_Pt_0_05	FA_PT50	Right_VentralDC	0.0217413	-0.0128994	30666	0.0924004	1	Volume
PA_Pt_e05	ISOVF_PT50	lh_isthmuscingulate	0.00642855	-0.0138321	30666	0.0926458	0.546427
PA_Pt_e05	ISOVF_PT50	lh_superiorparietal	0.00762966	-0.0140135	30666	0.0926458	0.648521
PA_Pt_e05	ISOVF_PT50	rh_precuneus	0.00743917	-0.0136453	30666	0.0926458	0.632329
PA_Pt_e05	ISOVF_PT50	Left_Hippocampus	0.0109851	-0.013837	30666	0.0933737	0.933737
PA_Pt_e05	ISOVF_PT50	rh_lateraloccipital	0.0106355	-0.0136677	30666	0.0933737	0.904018
PA_Pt_e05	ISOVF_PT50	rh_pericalcarine	0.0096364	-0.0139757	30666	0.0933737	0.819094
NREAD_Pt_0_1	ISOVF_CT30	Left_VentralDC	0.0551992	-0.00976038	30666	0.0938386	1
NREAD_Pt_0_1	ISOVF_CT30	rh_transversetemporal	0.0550232	-0.0104641	30666	0.0938386	1
WR_Pt_5e05	ICVF_CT30	rh_frontalpole	0.0011063	-0.0176762	30666	0.0940352	0.0940352
PA_Pt_1	ICVF_CT30	Right_Caudate	0.0842702	-0.00926594	30666	0.0942496	1
SP_Pt_1	ISOVF_PT50	rh_fusiform	0.00889909	-0.0140873	30666	0.0945528	0.756423
SP_Pt_0_05	SC_CT30	rh_fusiform	0.00111246	-0.0164805	30666	0.0945595	0.0945595
NREP_Pt_0_1	FA_PT50	rh_inferiortemporal	0.0017003	0.0170039	30666	0.0948555	0.144525
NREP_Pt_0_1	FA_PT50	rh_middletemporal	0.00223189	0.0165077	30666	0.0948555	0.189711
WR_Pt_0_01	SC_CT30	rh_pericalcarine	0.00223293	-0.0150137	30666	0.0948996	0.189799
DYS_Pt_5e08	OD_CT30	lh_parsorbitalis	0.0480493	0.0110053	30666	0.0949811	1
DYS_Pt_e05	SC_CT30	lh_rostralanteriorcingulate	0.00111824	-0.0174878	30666	0.0950508	0.0950508
DYS_Pt_e05	OD_CT30	rh_superiorfrontal	0.0392705	0.0109281	30666	0.0953712	1
NREAD_Pt_0_1	OD_PT50	lh_rostralmiddlefrontal	0.00289329	0.0163676	30666	0.0958022	0.24593
NREAD_Pt_0_1	OD_PT50	rh_lateralorbitofrontal	0.00338126	0.0164179	30666	0.0958022	0.287407
PA_Pt_1	MD_PT50	Right_Accumbens_area	0.00453124	0.015924	30666	0.0962889	0.385156
PA_Pt_1	MD_PT50	rh_parsorbitalis	0.00414298	0.0154612	30666	0.0962889	0.352153
WR_Pt_1	ISOVF_PT50	lh_frontalpole	0.0850514	-0.0095878	30666	0.0963916	1
PA_Pt_0_01	ISOVF_CT30	rh_pericalcarine	0.0771147	-0.00927321	30666	0.0963934	1
WR_Pt_0_01	SC_PT50	Right_Amygdala	0.00574771	-0.0151064	30666	0.0977111	0.488556
WR_Pt_0_01	SC_PT50	rh_cuneus	0.00484567	-0.0151236	30666	0.0977111	0.411882
WR_Pt_0_01	SC_PT50	rh_inferiorparietal	0.00320393	-0.0144573	30666	0.0977111	0.272334
WR_Pt_0_01	SC_PT50	rh_lingual	0.00493069	-0.0140779	30666	0.0977111	0.419109
WR_Pt_0_01	SC_PT50	rh_pericalcarine	0.00249755	-0.0150339	30666	0.0977111	0.212292
WR_Pt_0_001	SC_PT50	Right_Pallidum	0.00115443	0.0162645	30666	0.0981265	0.0981265
DYS_Pt_1	FA_PT50	Right_Pallidum	0.00163727	-0.0174076	30666	0.0988074	0.139168
DYS_Pt_1	FA_PT50	rh_parsopercularis	0.00232488	-0.0170371	30666	0.0988074	0.197615
NREP_Pt_1	FA_CT30	Right_Thalamus_Proper	0.0104656	0.0145876	30666	0.0988419	0.889577
WR_Pt_0_01	SC_CT30	rh_inferiorparietal	0.00349401	-0.0142425	30666	0.098997	0.296991
NREAD_Pt_1	ISOVF_PT50	lh_superiorparietal	0.0350615	-0.0111095	30666	0.0993409	1
PA_Pt_0_01	FA_CT30	lh_isthmuscingulate	0.00792052	-0.0150069	30666	0.0996841	0.673244
PA_Pt_0_01	FA_CT30	lh_parstriangularis	0.00826047	-0.0143526	30666	0.0996841	0.70214
PA_Pt_0_01	FA_CT30	lh_posteriorcingulate	0.00316938	-0.0165888	30666	0.0996841	0.269398
PA_Pt_0_01	FA_CT30	lh_precuneus	0.00938204	-0.0146015	30666	0.0996841	0.797473
PA_Pt_0_01	FA_CT30	lh_frontalpole	0.0033981	-0.016011	30666	0.0996841	0.288838
PA_Pt_0_01	FA_CT30	rh_lateralorbitofrontal	0.00750334	-0.0148778	30666	0.0996841	0.637784
PA_Pt_0_01	FA_CT30	rh_middletemporal	0.00478063	-0.0156891	30666	0.0996841	0.406353
PA_Pt_0_01	FA_CT30	rh_superiortemporal	0.00557042	-0.0156104	30666	0.0996841	0.473486
NREAD_Pt_0_05	ISOVF_PT50	Brain_Stem	0.0462997	-0.0108803	30666	0.0997381	1
NREAD_Pt_0_05	ISOVF_PT50	lh_posteriorcingulate	0.045096	-0.0103246	30666	0.0997381	1
NREAD_Pt_0_05	ISOVF_PT50	lh_transversetemporal	0.0469356	-0.0110894	30666	0.0997381	1
SP_Pt_0_05	ISOVF_CT30	Right_Caudate	0.0168475	-0.0120546	30666	0.0998925	1
SP_Pt_0_05	ISOVF_CT30	Right_Putamen	0.0222445	-0.0114857	30666	0.0998925	1
SP_Pt_0_05	ISOVF_CT30	Right_Pallidum	0.00568079	-0.0139164	30666	0.0998925	0.482867
SP_Pt_0_05	ISOVF_CT30	lh_medialorbitofrontal	0.0162135	-0.0132084	30666	0.0998925	1
SP_Pt_0_05	ISOVF_CT30	lh_paracentral	0.0223289	-0.0114327	30666	0.0998925	1
SP_Pt_0_05	ISOVF_CT30	lh_parstriangularis	0.0165136	-0.0124168	30666	0.0998925	1
SP_Pt_0_05	ISOVF_CT30	lh_postcentral	0.00726338	-0.0139579	30666	0.0998925	0.617387
SP_Pt_0_05	ISOVF_CT30	lh_precuneus	0.0163761	-0.0123716	30666	0.0998925	1
SP_Pt_0_05	ISOVF_CT30	lh_superiorparietal	0.00904873	-0.0136109	30666	0.0998925	0.769142
SP_Pt_0_05	ISOVF_CT30	rh_lateraloccipital	0.00463126	-0.0149853	30666	0.0998925	0.393657
SP_Pt_0_05	ISOVF_CT30	rh_lateralorbitofrontal	0.0202837	-0.0125382	30666	0.0998925	1
SP_Pt_0_05	ISOVF_CT30	rh_medialorbitofrontal	0.0152572	-0.0132087	30666	0.0998925	1
SP_Pt_0_05	ISOVF_CT30	rh_pericalcarine	0.0201025	-0.0122062	30666	0.0998925	1
SP_Pt_0_05	ISOVF_CT30	rh_precuneus	0.00834762	-0.0132563	30666	0.0998925	0.709548
SP_Pt_0_05	ISOVF_CT30	rh_superiorparietal	0.0163938	-0.0122573	30666	0.0998925	1
SP_Pt_0_05	ISOVF_CT30	rh_superiortemporal	0.0176602	-0.0125735	30666	0.0998925	1
SP_Pt_0_05	ISOVF_CT30	rh_supramarginal	0.00801713	-0.0136297	30666	0.0998925	0.681456
SP_Pt_0_05	ISOVF_CT30	rh_insula	0.0109746	-0.0131759	30666	0.0998925	0.932842
NREAD_Pt_0_01	OD_CT30	lh_rostralmiddlefrontal	0.00175409	0.0169822	30666	0.10117	0.149098
NREAD_Pt_0_01	OD_CT30	rh_medialorbitofrontal	0.00289002	0.0164211	30666	0.10117	0.245652
NREAD_Pt_0_01	OD_CT30	rh_insula	0.0035707	0.0153079	30666	0.10117	0.30351
DYS_Pt_0_01	OD_PT50	lh_cuneus	0.00238492	0.0170128	30666	0.101359	0.202719
DYS_Pt_0_1	OD_PT50	lh_pericalcarine	0.00119435	0.0178273	30666	0.10152	0.10152
PA_Pt_e05	ISOVF_PT50	lh_inferiortemporal	0.0143346	-0.0129742	30666	0.101536	1
DYS_Pt_0_1	FA_PT50	Right_Pallidum	0.00291596	-0.0164529	30666	0.10211	0.247856
DYS_Pt_0_1	FA_PT50	lh_transversetemporal	0.00360387	-0.0164029	30666	0.10211	0.306329
DYS_Pt_0_1	FA_PT50	rh_parsopercularis	0.00212729	-0.0171859	30666	0.10211	0.180819
PA_Pt_0_05	MD_CT30	lh_caudalanteriorcingulate	0.00241393	0.0155087	30666	0.102592	0.205184
DYS_Pt_0_001	OD_CT30	rh_inferiortemporal	0.061619	0.00961968	30666	0.102698	1
DYS_Pt_0_001	OD_CT30	rh_parsopercularis	0.0608317	0.0103196	30666	0.102698	1
DYS_Pt_0_5	SC_PT50	rh_pericalcarine	0.0292939	0.0108439	30666	0.103749	1	Area
SP_Pt_0_1	MD_PT50	rh_insula	0.00244273	-0.0159721	30666	0.103816	0.207632
PA_Pt_0_01	ISOVF_PT50	Right_Accumbens_area	0.0922057	-0.00951355	30666	0.1045	1
NREAD_Pt_5e05	OD_PT50	rh_lateraloccipital	0.0307805	0.0121076	30666	0.104654	1
PA_Pt_0_5	MD_PT50	lh_superiorfrontal	0.00246328	0.0156164	30666	0.10469	0.209379
PA_Pt_0_5	MD_PT50	rh_lingual	0.0014957	0.0178198	30666	0.10469	0.127134
SP_Pt_0_001	SC_CT30	rh_lateraloccipital	0.00123254	-0.0154878	30666	0.104766	0.104766
SP_Pt_0_05	ISOVF_PT50	rh_lateraloccipital	0.042101	-0.0108849	30666	0.105252	1
DYS_Pt_1	FA_PT50	rh_rostralanteriorcingulate	0.0048501	-0.0156936	30666	0.105392	0.412259
DYS_Pt_1	FA_PT50	rh_transversetemporal	0.00495962	-0.0159084	30666	0.105392	0.421568	Volume
SP_Pt_0_05	ISOVF_CT30	rh_inferiorparietal	0.0248119	-0.0115954	30666	0.105451	1
SP_Pt_0_5	ISOVF_CT30	lh_lingual	0.0394659	-0.0106547	30666	0.105504	1
SP_Pt_0_5	ISOVF_CT30	lh_supramarginal	0.0394929	-0.0110348	30666	0.105504	1
SP_Pt_0_5	ISOVF_CT30	rh_fusiform	0.0365607	-0.0113437	30666	0.105504	1
SP_Pt_0_5	ISOVF_CT30	rh_rostralmiddlefrontal	0.039719	-0.0104751	30666	0.105504	1
WR_Pt_0_5	ISOVF_PT50	lh_rostralanteriorcingulate	0.0934934	-0.00886604	30666	0.105959	1
PA_Pt_0_01	FA_CT30	lh_inferiortemporal	0.0120846	-0.0140202	30666	0.105978	1
PA_Pt_0_01	FA_CT30	rh_parsorbitalis	0.012468	-0.0134572	30666	0.105978	1
PA_Pt_5e05	ISOVF_PT50	Right_Putamen	0.0102625	-0.0127026	30666	0.106052	0.872313
PA_Pt_5e05	ISOVF_PT50	lh_precentral	0.0152234	-0.0125277	30666	0.106052	1
PA_Pt_5e05	ISOVF_PT50	lh_rostralanteriorcingulate	0.0148175	-0.0127892	30666	0.106052	1
PA_Pt_5e05	ISOVF_PT50	lh_superiorfrontal	0.0184657	-0.0115932	30666	0.106052	1
PA_Pt_5e05	ISOVF_PT50	lh_insula	0.0151999	-0.0127471	30666	0.106052	1
PA_Pt_5e05	ISOVF_PT50	rh_caudalanteriorcingulate	0.0166866	-0.0127073	30666	0.106052	1
PA_Pt_5e05	ISOVF_PT50	rh_caudalmiddlefrontal	0.00394285	-0.0147554	30666	0.106052	0.335143
PA_Pt_5e05	ISOVF_PT50	rh_paracentral	0.0182521	-0.0118814	30666	0.106052	1
PA_Pt_5e05	ISOVF_PT50	rh_parsopercularis	0.00623661	-0.0136901	30666	0.106052	0.530112
PA_Pt_5e05	ISOVF_PT50	rh_parstriangularis	0.0199627	-0.0119446	30666	0.106052	1
PA_Pt_5e05	ISOVF_PT50	rh_precentral	0.0188076	-0.0119629	30666	0.106052	1
PA_Pt_5e05	ISOVF_PT50	rh_precuneus	0.00899008	-0.0133243	30666	0.106052	0.764157
PA_Pt_5e05	ISOVF_PT50	rh_superiorfrontal	0.0108495	-0.0125901	30666	0.106052	0.922206
PA_Pt_5e05	ISOVF_PT50	rh_superiorparietal	0.0175406	-0.0121709	30666	0.106052	1
PA_Pt_5e05	ISOVF_PT50	rh_supramarginal	0.0114596	-0.0132223	30666	0.106052	0.974069
DYS_Pt_1	SC_PT50	lh_entorhinal	0.0326799	-0.0115233	30666	0.106058	1
DYS_Pt_1	SC_PT50	lh_lingual	0.0315884	0.0108119	30666	0.106058	1	Area
DYS_Pt_1	SC_PT50	rh_rostralmiddlefrontal	0.0336889	-0.0100115	30666	0.106058	1
WR_Pt_1e05	ICVF_CT30	Left_Hippocampus	0.0901887	-0.00954013	30666	0.106473	1
NREAD_Pt_0_05	OD_CT30	Right_Hippocampus	0.0395029	0.010451	30666	0.107181	1
NREAD_Pt_0_05	OD_CT30	lh_bankssts	0.0371017	0.0113166	30666	0.107181	1
NREAD_Pt_0_05	OD_CT30	lh_caudalanteriorcingulate	0.0413228	0.0112983	30666	0.107181	1
NREAD_Pt_0_05	OD_CT30	lh_lingual	0.0428722	0.010381	30666	0.107181	1
NREAD_Pt_0_05	OD_CT30	lh_medialorbitofrontal	0.0387378	0.0111671	30666	0.107181	1
NREAD_Pt_0_05	OD_CT30	rh_lingual	0.0418881	0.0106202	30666	0.107181	1
NREAD_Pt_1	ISOVF_PT50	lh_parsopercularis	0.0429347	-0.0104011	30666	0.107337	1
DYS_Pt_0_05	OD_CT30	lh_parstriangularis	0.00126398	0.0176405	30666	0.107438	0.107438
DYS_Pt_5e05	SC_PT50	lh_rostralanteriorcingulate	0.00127361	-0.0170703	30666	0.108257	0.108257
PA_Pt_e05	MD_PT50	rh_caudalanteriorcingulate	0.00127431	-0.0178819	30666	0.108316	0.108316
WR_Pt_5e05	MD_CT30	lh_medialorbitofrontal	0.00128804	0.0171508	30666	0.109484	0.109484
DYS_Pt_0_001	FA_PT50	lh_superiortemporal	0.0055151	-0.015434	30666	0.109615	0.468783
DYS_Pt_0_001	FA_PT50	lh_transversetemporal	0.00644797	-0.0153123	30666	0.109615	0.548077
SP_Pt_0_01	ISOVF_PT50	lh_medialorbitofrontal	0.00129394	-0.0176905	30666	0.109985	0.109985
NREAD_Pt_0_1	OD_PT50	Left_Putamen	0.00776847	0.0138428	30666	0.110053	0.66032
NREAD_Pt_0_1	OD_PT50	lh_superiorfrontal	0.00530098	0.0152885	30666	0.110053	0.450583
NREAD_Pt_0_1	OD_PT50	rh_middletemporal	0.00760943	0.0147806	30666	0.110053	0.646802
DYS_Pt_5e05	MD_PT50	lh_entorhinal	0.0154614	-0.0136216	30666	0.110815	1
DYS_Pt_5e05	MD_PT50	lh_superiortemporal	0.0156445	-0.0129102	30666	0.110815	1
DYS_Pt_5e05	MD_PT50	rh_rostralmiddlefrontal	0.0154576	-0.0131674	30666	0.110815	1
SP_Pt_0_5	ISOVF_PT50	Brain_Stem	0.0326247	-0.0116753	30666	0.110924	1
SP_Pt_0_5	ISOVF_PT50	lh_fusiform	0.0317498	-0.0114972	30666	0.110924	1
PA_Pt_0_05	FA_CT30	lh_fusiform	0.0391668	-0.0112882	30666	0.110973	1
SP_Pt_0_001	SC_PT50	rh_lateraloccipital	0.00131075	-0.0156412	30666	0.111414	0.111414
PA_Pt_e05	OD_CT30	rh_isthmuscingulate	0.0804528	0.00931482	30666	0.112144	1
PA_Pt_e05	OD_CT30	rh_postcentral	0.08048	0.00924707	30666	0.112144	1
NREAD_Pt_0_1	OD_CT30	lh_inferiortemporal	0.00528395	0.0149564	30666	0.112284	0.449136
NREAD_Pt_0_1	OD_CT30	rh_medialorbitofrontal	0.00419987	0.0158138	30666	0.112284	0.356989
DYS_Pt_0_05	SC_CT30	Right_Thalamus_Proper	0.0198624	-0.00953979	30666	0.112553	1
WR_Pt_0_5	ISOVF_CT30	rh_frontalpole	0.090286	-0.00946446	30666	0.112857	1
NREP_Pt_0_01	MD_PT50	rh_pericalcarine	0.00265673	-0.0168279	30666	0.112911	0.225822
SP_Pt_0_05	ISOVF_CT30	Left_Pallidum	0.0327335	-0.0111241	30666	0.113215	1
SP_Pt_0_05	ISOVF_CT30	Right_VentralDC	0.0332985	-0.0110336	30666	0.113215	1
SP_Pt_0_05	ISOVF_CT30	rh_parstriangularis	0.0316106	-0.011111	30666	0.113215	1
DYS_Pt_e05	MD_PT50	lh_superiorfrontal	0.0535724	-0.00996039	30666	0.113841	1
DYS_Pt_e05	MD_PT50	rh_precuneus	0.0528994	-0.0103769	30666	0.113841	1
PA_Pt_0_05	MD_CT30	lh_paracentral	0.00571202	0.014523	30666	0.113962	0.485522
PA_Pt_0_05	MD_CT30	lh_frontalpole	0.00670362	0.0143948	30666	0.113962	0.569808
PA_Pt_0_05	MD_CT30	rh_caudalanteriorcingulate	0.00637867	0.0141816	30666	0.113962	0.542187
PA_Pt_0_01	FA_CT30	lh_medialorbitofrontal	0.0162094	-0.0130582	30666	0.114816	1
PA_Pt_0_01	FA_CT30	lh_superiorparietal	0.0155358	-0.0135424	30666	0.114816	1
PA_Pt_0_01	FA_CT30	rh_bankssts	0.0262331	-0.012639	30666	0.115448	1
PA_Pt_0_01	FA_CT30	rh_cuneus	0.0262099	-0.0126588	30666	0.115448	1
PA_Pt_0_01	FA_CT30	rh_fusiform	0.0246244	-0.0123901	30666	0.115448	1
PA_Pt_0_01	FA_CT30	rh_lateraloccipital	0.0260602	-0.0120653	30666	0.115448	1
PA_Pt_0_01	FA_CT30	rh_medialorbitofrontal	0.020662	-0.0126624	30666	0.115448	1
PA_Pt_0_01	FA_CT30	rh_precuneus	0.0177309	-0.0131581	30666	0.115448	1
PA_Pt_0_01	FA_CT30	rh_rostralmiddlefrontal	0.0271643	-0.011984	30666	0.115448	1
PA_Pt_0_01	FA_CT30	rh_supramarginal	0.0214071	-0.0129712	30666	0.115448	1
DYS_Pt_0_1	SC_CT30	rh_superiortemporal	0.0231716	-0.0109601	30666	0.115858	1	Volume
NREAD_Pt_0_01	MD_CT30	lh_supramarginal	0.00272735	-0.0160544	30666	0.115912	0.231825
NREAD_Pt_0_1	OD_PT50	lh_inferiortemporal	0.0109628	0.0138392	30666	0.11648	0.931837
DYS_Pt_5e05	OD_CT30	Left_Pallidum	0.0467427	0.010574	30666	0.116857	1
DYS_Pt_0_05	SC_PT50	Right_Thalamus_Proper	0.0220761	-0.00960038	30666	0.117279	1
DYS_Pt_5e08	MD_CT30	lh_cuneus	0.0138032	-0.0127235	30666	0.117327	1
DYS_Pt_0_05	SC_PT50	rh_pericalcarine	0.0235681	0.0112606	30666	0.117841	1
PA_Pt_0_05	FA_CT30	rh_parsorbitalis	0.0445124	-0.010823	30666	0.118236	1
NREP_Pt_0_1	SC_CT30	lh_precentral	0.00278663	0.0140142	30666	0.118432	0.236864
NREP_Pt_0_1	SC_CT30	rh_posteriorcingulate	0.0019934	0.016608	30666	0.118432	0.169439
NREAD_Pt_0_05	ISOVF_CT30	Right_VentralDC	0.0698888	-0.00940294	30666	0.118811	1
PA_Pt_0_1	ICVF_PT50	Right_Thalamus_Proper	0.0335577	-0.0117615	30666	0.11929	1
PA_Pt_0_1	ICVF_PT50	lh_caudalmiddlefrontal	0.0329606	-0.0115667	30666	0.11929	1	Volume
PA_Pt_0_1	ICVF_PT50	lh_lingual	0.0336818	-0.0114787	30666	0.11929	1
PA_Pt_0_1	ICVF_PT50	lh_superiorfrontal	0.0335078	-0.0115878	30666	0.11929	1
PA_Pt_0_1	ICVF_PT50	rh_parahippocampal	0.0307816	-0.0118785	30666	0.11929	1
DYS_Pt_0_01	OD_CT30	lh_lateralorbitofrontal	0.047797	0.0105198	30666	0.119493	1
WR_Pt_1e05	FA_CT30	rh_paracentral	0.00281255	-0.0167423	30666	0.119533	0.239067
WR_Pt_1e05	FA_CT30	rh_parsopercularis	0.00140758	-0.0173406	30666	0.119533	0.119644
DYS_Pt_0_001	OD_PT50	Right_Putamen	0.0112576	0.0131142	30666	0.119612	0.956898
DYS_Pt_5e08	ICVF_CT30	Right_VentralDC	0.0939556	0.00935273	30666	0.120136	1
DYS_Pt_5e08	ICVF_CT30	lh_superiortemporal	0.0953656	0.00920386	30666	0.120136	1
DYS_Pt_5e08	ICVF_CT30	rh_medialorbitofrontal	0.0961092	0.00905192	30666	0.120136	1
PA_Pt_0_1	ISOVF_CT30	Left_Pallidum	0.0568176	-0.00991497	30666	0.120737	1
DYS_Pt_5e05	FA_PT50	Right_Pallidum	0.00142118	-0.0175974	30666	0.120801	0.120801
DYS_Pt_0_05	OD_CT30	Left_VentralDC	0.00495661	0.0143653	30666	0.12135	0.421312
DYS_Pt_0_05	OD_CT30	lh_inferiorparietal	0.00336917	0.0158619	30666	0.12135	0.286379
DYS_Pt_0_05	OD_CT30	lh_precentral	0.00571059	0.0144846	30666	0.12135	0.485401	Volume, Thickness
DYS_Pt_0_01	SC_PT50	lh_lingual	0.017186	0.0119659	30666	0.122192	1
DYS_Pt_0_01	SC_PT50	lh_rostralanteriorcingulate	0.0172507	-0.0126249	30666	0.122192	1	Volume
DYS_Pt_0_01	SC_PT50	lh_transversetemporal	0.0145681	-0.0131286	30666	0.122192	1	Thickness
DYS_Pt_0_01	SC_PT50	rh_inferiortemporal	0.0140457	-0.012023	30666	0.122192	1
WR_Pt_5e05	ICVF_CT30	lh_medialorbitofrontal	0.00689173	-0.014786	30666	0.122293	0.585797
WR_Pt_5e05	ICVF_CT30	lh_rostralmiddlefrontal	0.0103561	-0.0137299	30666	0.122293	0.880265
WR_Pt_5e05	ICVF_CT30	lh_frontalpole	0.00527863	-0.015092	30666	0.122293	0.448683
WR_Pt_5e05	ICVF_CT30	rh_medialorbitofrontal	0.00806794	-0.0144126	30666	0.122293	0.685775
WR_Pt_5e05	ICVF_CT30	rh_paracentral	0.0112575	-0.0140906	30666	0.122293	0.95689
WR_Pt_5e05	ICVF_CT30	rh_posteriorcingulate	0.00647499	-0.0148008	30666	0.122293	0.550374
WR_Pt_5e05	ICVF_CT30	rh_rostralanteriorcingulate	0.0115099	-0.0139971	30666	0.122293	0.978343
PA_Pt_e05	ISOVF_CT30	lh_cuneus	0.0125772	-0.0129702	30666	0.123086	1
PA_Pt_e05	ISOVF_CT30	lh_fusiform	0.0144224	-0.0129588	30666	0.123086	1
PA_Pt_e05	ISOVF_CT30	lh_isthmuscingulate	0.00732616	-0.013732	30666	0.123086	0.622724
PA_Pt_e05	ISOVF_CT30	lh_precuneus	0.00486262	-0.0145003	30666	0.123086	0.413323
PA_Pt_e05	ISOVF_CT30	lh_superiorparietal	0.0120903	-0.0130742	30666	0.123086	1
PA_Pt_e05	ISOVF_CT30	lh_insula	0.00607659	-0.0144169	30666	0.123086	0.516511
PA_Pt_e05	ISOVF_CT30	rh_caudalmiddlefrontal	0.0133101	-0.0121824	30666	0.123086	1
PA_Pt_e05	ISOVF_CT30	rh_lateraloccipital	0.0144807	-0.0129286	30666	0.123086	1
PA_Pt_e05	ISOVF_CT30	rh_pericalcarine	0.00613079	-0.0143792	30666	0.123086	0.521117
PA_Pt_e05	ISOVF_CT30	rh_precuneus	0.00927847	-0.0130636	30666	0.123086	0.78867
SP_Pt_0_5	ISOVF_PT50	Right_Putamen	0.0408439	-0.0101399	30666	0.123408	1
SP_Pt_0_5	ISOVF_PT50	lh_paracentral	0.0435557	-0.0104595	30666	0.123408	1
SP_Pt_0_5	ISOVF_PT50	rh_bankssts	0.0419452	-0.0106152	30666	0.123408	1
SP_Pt_0_5	ISOVF_PT50	rh_superiorparietal	0.0421497	-0.0104324	30666	0.123408	1
NREAD_Pt_1	ISOVF_PT50	rh_isthmuscingulate	0.0583581	-0.00988381	30666	0.124011	1
PA_Pt_0_05	FA_CT30	Right_Hippocampus	0.0497123	-0.0109511	30666	0.124281	1
WR_Pt_0_001	ISOVF_CT30	rh_lateraloccipital	0.0498791	-0.0103727	30666	0.124698	1
NREP_Pt_1	FA_CT30	lh_postcentral	0.0352536	0.0118821	30666	0.124856	1
PA_Pt_0_01	FA_PT50	rh_parsopercularis	0.00557796	-0.0154581	30666	0.125222	0.474127
PA_Pt_0_01	FA_PT50	rh_postcentral	0.00589281	-0.0153746	30666	0.125222	0.500889
NREP_Pt_1	FA_CT30	rh_precentral	0.037147	0.0118004	30666	0.1263	1
DYS_Pt_5e08	MD_PT50	lh_medialorbitofrontal	0.0506329	-0.0106598	30666	0.126582	1
NREAD_Pt_0_01	OD_CT30	lh_superiorfrontal	0.00596744	0.014604	30666	0.126808	0.507232
NREAD_Pt_0_1	ISOVF_PT50	Right_Putamen	0.0449179	-0.00994733	30666	0.127267	1
WR_Pt_0_1	ISOVF_CT30	lh_isthmuscingulate	0.0975112	-0.0085365	30666	0.127515	1
SP_Pt_1e05	OD_CT30	Right_Hippocampus	0.0255791	0.0113126	30666	0.127896	1
SP_Pt_1e05	OD_CT30	lh_posteriorcingulate	0.0242937	0.0123054	30666	0.127896	1
SP_Pt_1e05	OD_CT30	rh_parahippocampal	0.0233166	0.0116301	30666	0.127896	1
DYS_Pt_5e08	MD_CT30	Left_Putamen	0.0484057	-0.010007	30666	0.127912	1
DYS_Pt_5e08	MD_CT30	Right_VentralDC	0.04966	-0.0102648	30666	0.127912	1
NREP_Pt_0_5	FA_PT50	Left_Thalamus_Proper	0.00853101	0.0147756	30666	0.127947	0.725136
NREP_Pt_0_5	FA_PT50	lh_paracentral	0.00315405	0.0162493	30666	0.127947	0.268094
NREP_Pt_0_5	FA_PT50	lh_transversetemporal	0.00577914	0.0155512	30666	0.127947	0.491227
NREP_Pt_0_5	FA_PT50	rh_inferiorparietal	0.00812025	0.0142501	30666	0.127947	0.690222
NREP_Pt_0_5	FA_PT50	rh_middletemporal	0.00240458	0.0164068	30666	0.127947	0.204389
NREP_Pt_0_5	FA_PT50	rh_transversetemporal	0.00903156	0.0147813	30666	0.127947	0.767683
NREAD_Pt_0_05	MD_CT30	lh_medialorbitofrontal	0.102651	-0.00870754	30666	0.128313	1
PA_Pt_0_01	FA_CT30	lh_lingual	0.0483729	-0.0108401	30666	0.128491	1
PA_Pt_0_01	FA_CT30	rh_caudalanteriorcingulate	0.0479813	-0.0110699	30666	0.128491	1
PA_Pt_0_01	FA_CT30	rh_inferiortemporal	0.0470791	-0.0109745	30666	0.128491	1
WR_Pt_0_01	SC_CT30	rh_lingual	0.00605231	-0.0137416	30666	0.128612	0.514446
NREP_Pt_0_001	ISOVF_CT30	Left_Hippocampus	0.00152098	0.0165505	30666	0.129283	0.129283
PA_Pt_0_5	MD_PT50	Right_Accumbens_area	0.00630167	0.0153229	30666	0.129859	0.535642
PA_Pt_0_5	MD_PT50	lh_paracentral	0.00763875	0.0144294	30666	0.129859	0.649294
PA_Pt_0_5	MD_PT50	rh_parsorbitalis	0.00527985	0.0150414	30666	0.129859	0.448787
NREAD_Pt_0_01	MD_CT30	rh_rostralmiddlefrontal	0.0352887	-0.0106856	30666	0.130415	1
DYS_Pt_0_05	OD_CT30	lh_parsorbitalis	0.00767386	0.0148772	30666	0.130456	0.652278
DYS_Pt_5e05	OD_CT30	Right_Thalamus_Proper	0.0587905	0.00965128	30666	0.130882	1
DYS_Pt_5e05	OD_CT30	Right_Putamen	0.0575264	0.00971165	30666	0.130882	1
DYS_Pt_5e05	OD_CT30	rh_cuneus	0.0601027	0.0103723	30666	0.130882	1
DYS_Pt_5e05	OD_CT30	rh_precuneus	0.0615915	0.0101289	30666	0.130882	1
PA_Pt_0_01	FA_CT30	Left_Putamen	0.0618406	-0.0105675	30666	0.131411	1
PA_Pt_0_01	FA_CT30	lh_middletemporal	0.0609948	-0.0103871	30666	0.131411	1
PA_Pt_0_01	FA_CT30	rh_insula	0.0602385	-0.0106897	30666	0.131411	1
DYS_Pt_1	SC_PT50	lh_cuneus	0.0542282	0.0102746	30666	0.131697	1
DYS_Pt_1	SC_PT50	lh_rostralanteriorcingulate	0.0531557	-0.0102674	30666	0.131697	1
PA_Pt_0_05	FA_PT50	Right_Hippocampus	0.00155036	-0.0178776	30666	0.131781	0.131781
NREP_Pt_0_5	FA_PT50	lh_middletemporal	0.0108969	0.0136552	30666	0.132319	0.926234
DYS_Pt_1	FA_CT30	lh_parstriangularis	0.0124612	-0.0136212	30666	0.1324	1
SP_Pt_0_5	ISOVF_CT30	Right_VentralDC	0.06239	-0.00967403	30666	0.132579	1
SP_Pt_1	ISOVF_CT30	Right_Caudate	0.00881826	-0.0132308	30666	0.132659	0.749552
SP_Pt_1	ISOVF_CT30	rh_lateraloccipital	0.00476823	-0.0149601	30666	0.132659	0.405299
SP_Pt_1	ISOVF_CT30	rh_medialorbitofrontal	0.00936418	-0.0141692	30666	0.132659	0.795955
SP_Pt_1	ISOVF_CT30	rh_pericalcarine	0.00898154	-0.0137424	30666	0.132659	0.763431
SP_Pt_1	ISOVF_CT30	rh_postcentral	0.00582777	-0.0139419	30666	0.132659	0.49536
SP_Pt_1	ISOVF_CT30	rh_insula	0.00758039	-0.0138546	30666	0.132659	0.644333
WR_Pt_1e05	ISOVF_PT50	Left_Accumbens_area	0.00156223	-0.0178644	30666	0.13279	0.13279
DYS_Pt_0_1	FA_PT50	rh_rostralanteriorcingulate	0.00781955	-0.0148186	30666	0.132932	0.664662
DYS_Pt_0_1	FA_PT50	rh_transversetemporal	0.00724805	-0.015204	30666	0.132932	0.616084	Volume
DYS_Pt_0_1	SC_CT30	lh_cuneus	0.0375908	0.0109624	30666	0.133134	1
PA_Pt_0_1	FA_CT30	Left_Caudate	0.0511347	-0.0106968	30666	0.133246	1
PA_Pt_0_1	FA_CT30	lh_lateralorbitofrontal	0.0532983	-0.0105049	30666	0.133246	1
PA_Pt_0_1	FA_CT30	lh_superiortemporal	0.0520628	-0.0109521	30666	0.133246	1
PA_Pt_0_1	FA_CT30	lh_insula	0.0496278	-0.0110271	30666	0.133246	1
PA_Pt_0_1	FA_CT30	rh_fusiform	0.0462682	-0.0109908	30666	0.133246	1
PA_Pt_0_1	FA_CT30	rh_medialorbitofrontal	0.0461539	-0.0109135	30666	0.133246	1
PA_Pt_0_1	FA_CT30	rh_parsorbitalis	0.0393286	-0.0111017	30666	0.133246	1
PA_Pt_0_1	FA_CT30	rh_rostralanteriorcingulate	0.0478904	-0.011076	30666	0.133246	1
PA_Pt_0_1	FA_CT30	rh_rostralmiddlefrontal	0.0511279	-0.0105831	30666	0.133246	1
PA_Pt_0_1	FA_CT30	rh_supramarginal	0.0498589	-0.0110597	30666	0.133246	1
SP_Pt_0_01	FA_CT30	Left_Thalamus_Proper	0.00778392	0.0150176	30666	0.133571	0.661633
SP_Pt_0_01	FA_CT30	Left_Putamen	0.00724878	0.0152002	30666	0.133571	0.616146
SP_Pt_0_01	FA_CT30	Right_Thalamus_Proper	0.0151859	0.0137938	30666	0.133571	1
SP_Pt_0_01	FA_CT30	Right_Putamen	0.00800348	0.015008	30666	0.133571	0.680296
SP_Pt_0_01	FA_CT30	Right_VentralDC	0.0140773	0.0139834	30666	0.133571	1
SP_Pt_0_01	FA_CT30	lh_caudalmiddlefrontal	0.0149562	0.0134926	30666	0.133571	1
SP_Pt_0_01	FA_CT30	lh_inferiorparietal	0.0188571	0.0128574	30666	0.133571	1
SP_Pt_0_01	FA_CT30	lh_superiorfrontal	0.0164899	0.0130263	30666	0.133571	1
SP_Pt_0_01	FA_CT30	rh_inferiortemporal	0.0142024	0.0135577	30666	0.133571	1
SP_Pt_0_01	FA_CT30	rh_precentral	0.0111769	0.0143223	30666	0.133571	0.950036
SP_Pt_0_01	FA_CT30	rh_rostralmiddlefrontal	0.00603449	0.0149008	30666	0.133571	0.512931
SP_Pt_0_01	FA_CT30	rh_superiorfrontal	0.0184571	0.0128025	30666	0.133571	1
NREAD_Pt_0_1	MD_CT30	lh_parsopercularis	0.0267238	-0.0114706	30666	0.133619	1
PA_Pt_5e05	ISOVF_PT50	lh_posteriorcingulate	0.0267303	-0.0114021	30666	0.133651	1
DYS_Pt_0_01	SC_CT30	lh_lingual	0.0253037	0.0112616	30666	0.134426	1
DYS_Pt_0_01	SC_CT30	lh_transversetemporal	0.024347	-0.0120237	30666	0.134426	1	Thickness
PA_Pt_5e05	SC_PT50	Left_Amygdala	0.0022928	-0.0163689	30666	0.134739	0.194888
PA_Pt_5e05	SC_PT50	rh_parsopercularis	0.00317032	-0.0152424	30666	0.134739	0.269477
DYS_Pt_0_05	SC_CT30	Left_Amygdala	0.0275354	-0.0118398	30666	0.134948	1
DYS_Pt_0_05	SC_CT30	Right_Amygdala	0.0355445	-0.0112914	30666	0.134948	1
DYS_Pt_0_05	SC_CT30	lh_posteriorcingulate	0.035688	-0.0110701	30666	0.134948	1
DYS_Pt_0_05	SC_CT30	rh_caudalanteriorcingulate	0.0335546	-0.0119495	30666	0.134948	1
DYS_Pt_0_05	SC_CT30	rh_inferiortemporal	0.0352039	-0.0102501	30666	0.134948	1
DYS_Pt_0_05	SC_CT30	rh_pericalcarine	0.0365153	0.010272	30666	0.134948	1
DYS_Pt_0_05	SC_CT30	rh_frontalpole	0.0332636	-0.0117027	30666	0.134948	1
DYS_Pt_0_1	SC_PT50	Right_Thalamus_Proper	0.0244307	-0.00944032	30666	0.13505	1
DYS_Pt_0_1	SC_PT50	rh_superiortemporal	0.0254212	-0.010829	30666	0.13505	1	Volume
DYS_Pt_e05	FA_PT50	lh_precentral	0.00635836	-0.0153377	30666	0.135115	0.540461
NREP_Pt_0_001	MD_PT50	lh_lingual	0.00293752	-0.0165062	30666	0.135173	0.249689
NREP_Pt_0_001	MD_PT50	lh_superiorparietal	0.00318053	-0.0161815	30666	0.135173	0.270345
DYS_Pt_0_1	SC_CT30	lh_posteriorcingulate	0.0397592	-0.01084	30666	0.135181	1
NREP_Pt_0_5	FA_PT50	rh_inferiortemporal	0.0127816	0.0135078	30666	0.135805	1
DYS_Pt_0_05	FA_CT30	rh_lateraloccipital	0.0868375	-0.00931055	30666	0.136689	1
DYS_Pt_1	OD_CT30	lh_inferiorparietal	0.00554942	0.015008	30666	0.136931	0.4717	Thickness
DYS_Pt_1	OD_CT30	lh_parsorbitalis	0.00653638	0.0151798	30666	0.136931	0.555592
DYS_Pt_1	OD_CT30	rh_lingual	0.00723953	0.0140375	30666	0.136931	0.61536
DYS_Pt_1	OD_CT30	rh_rostralanteriorcingulate	0.00805479	0.0150209	30666	0.136931	0.684657
SP_Pt_0_01	FA_CT30	Right_Pallidum	0.0257367	0.012605	30666	0.137037	1
SP_Pt_0_01	FA_CT30	lh_postcentral	0.0324862	0.0120323	30666	0.137037	1
SP_Pt_0_01	FA_CT30	lh_precentral	0.0307946	0.0120803	30666	0.137037	1
SP_Pt_0_01	FA_CT30	lh_precuneus	0.0338573	0.0119304	30666	0.137037	1
SP_Pt_0_01	FA_CT30	rh_caudalmiddlefrontal	0.0301098	0.01207	30666	0.137037	1
SP_Pt_0_01	FA_CT30	rh_inferiorparietal	0.0370805	0.011455	30666	0.137037	1
SP_Pt_0_01	FA_CT30	rh_paracentral	0.025438	0.0125199	30666	0.137037	1
SP_Pt_0_01	FA_CT30	rh_parstriangularis	0.0249333	0.0121475	30666	0.137037	1
SP_Pt_0_01	FA_CT30	rh_postcentral	0.0364778	0.0117555	30666	0.137037	1
SP_Pt_0_01	FA_CT30	rh_precuneus	0.0263438	0.0123298	30666	0.137037	1
SP_Pt_0_01	FA_CT30	rh_frontalpole	0.0330774	0.0115943	30666	0.137037	1
PA_Pt_0_1	ICVF_CT30	rh_temporalpole	0.125807	-0.00837913	30666	0.137097	1
NREAD_Pt_5e05	OD_CT30	rh_bankssts	0.0129224	0.0132987	30666	0.1373	1
DYS_Pt_0_05	SC_PT50	rh_inferiortemporal	0.0323078	-0.0104919	30666	0.137308	1
DYS_Pt_0_05	SC_PT50	rh_frontalpole	0.0314639	-0.0118157	30666	0.137308	1
NREP_Pt_0_05	MD_CT30	Right_Accumbens_area	0.00162575	-0.0175634	30666	0.138189	0.138189
DYS_Pt_e05	OD_CT30	rh_lateralorbitofrontal	0.0650304	0.0100379	30666	0.13819	1
NREP_Pt_0_5	ICVF_PT50	Left_Thalamus_Proper	0.00813516	0.0146772	30666	0.138298	0.691488
NREP_Pt_0_5	ICVF_PT50	lh_paracentral	0.00786929	0.014566	30666	0.138298	0.66889
NREP_Pt_0_5	ICVF_PT50	lh_transversetemporal	0.00597395	0.0153915	30666	0.138298	0.507785
NREP_Pt_0_5	ICVF_PT50	rh_middletemporal	0.0069031	0.0148663	30666	0.138298	0.586763
NREP_Pt_0_5	ICVF_PT50	rh_transversetemporal	0.00757912	0.0150959	30666	0.138298	0.644225
NREP_Pt_0_5	FA_CT30	Left_Thalamus_Proper	0.0395214	0.0116481	30666	0.139633	1
NREP_Pt_0_5	FA_CT30	rh_isthmuscingulate	0.0410685	0.0116429	30666	0.139633	1
DYS_Pt_0_05	SC_CT30	Brain_Stem	0.0413178	-0.0112524	30666	0.141873	1
DYS_Pt_0_05	SC_CT30	rh_parsorbitalis	0.0417273	-0.0106212	30666	0.141873	1
DYS_Pt_0_05	OD_PT50	rh_transversetemporal	0.00335576	-0.0164714	30666	0.14262	0.285239	Volume
DYS_Pt_1	FA_PT50	Right_Thalamus_Proper	0.00871874	-0.0147765	30666	0.14298	0.741092
DYS_Pt_1	FA_PT50	lh_transversetemporal	0.0100927	-0.0144971	30666	0.14298	0.857879	Thickness
WR_Pt_0_001	ISOVF_CT30	Left_Putamen	0.0673163	-0.00939526	30666	0.143047	1
PA_Pt_0_05	ICVF_PT50	lh_bankssts	0.104748	-0.00906975	30666	0.143606	1
NREAD_Pt_0_1	OD_PT50	rh_superiorfrontal	0.0170388	0.0130296	30666	0.144829	1
NREAD_Pt_0_05	MD_PT50	Left_Amygdala	0.0255716	-0.0121851	30666	0.144906	1
NREAD_Pt_0_05	MD_PT50	lh_cuneus	0.0243193	-0.0126273	30666	0.144906	1
PA_Pt_0_1	ISOVF_PT50	lh_rostralmiddlefrontal	0.0273298	-0.0116806	30666	0.14519	1
NREAD_Pt_1	ISOVF_CT30	rh_rostralmiddlefrontal	0.0854458	-0.00877083	30666	0.145258	1
NREAD_Pt_0_5	ISOVF_PT50	lh_lateraloccipital	0.0755252	-0.00933055	30666	0.145901	1
PA_Pt_0_1	ICVF_PT50	lh_lateraloccipital	0.0584206	-0.0103106	30666	0.146056	1
PA_Pt_0_1	ICVF_PT50	lh_supramarginal	0.0584223	-0.0105342	30666	0.146056	1
DYS_Pt_1	SC_CT30	lh_transversetemporal	0.0603389	-0.0100458	30666	0.146537	1
DYS_Pt_1	SC_CT30	rh_bankssts	0.0599435	-0.0101142	30666	0.146537	1
PA_Pt_1	MD_PT50	lh_paracentral	0.00862255	0.0142089	30666	0.146583	0.732917
DYS_Pt_0_1	OD_PT50	rh_transversetemporal	0.00345575	-0.0164246	30666	0.146869	0.293739	Volume
NREAD_Pt_0_1	MD_CT30	Right_Pallidum	0.0433942	-0.0104684	30666	0.146912	1
NREAD_Pt_0_1	MD_CT30	lh_inferiorparietal	0.0481283	-0.0106266	30666	0.146912	1
NREAD_Pt_0_1	MD_CT30	lh_isthmuscingulate	0.047523	-0.0101521	30666	0.146912	1
NREAD_Pt_0_1	MD_CT30	lh_precuneus	0.0455691	-0.0105511	30666	0.146912	1
NREAD_Pt_0_1	MD_CT30	lh_superiorparietal	0.0443069	-0.0107552	30666	0.146912	1
NREAD_Pt_0_1	MD_CT30	rh_caudalmiddlefrontal	0.0386026	-0.0103912	30666	0.146912	1
NREAD_Pt_0_1	MD_CT30	rh_inferiortemporal	0.0483947	-0.0103487	30666	0.146912	1
DYS_Pt_5e05	ISOVF_PT50	lh_parsorbitalis	0.00692224	-0.0144432	30666	0.147098	0.58839
DYS_Pt_5e05	ISOVF_PT50	lh_rostralanteriorcingulate	0.00185343	-0.0163432	30666	0.147098	0.157541
DYS_Pt_5e05	ISOVF_PT50	rh_medialorbitofrontal	0.00443168	-0.0154991	30666	0.147098	0.376692
DYS_Pt_5e05	ISOVF_PT50	rh_parstriangularis	0.00681372	-0.0138943	30666	0.147098	0.579166
DYS_Pt_0_001	SC_CT30	rh_precentral	0.0121197	-0.0120118	30666	0.147168	1
PA_Pt_5e05	MD_CT30	lh_lingual	0.0589953	-0.00929047	30666	0.147488	1
SP_Pt_5e05	OD_CT30	lh_parstriangularis	0.00347695	0.0159438	30666	0.14777	0.295541
NREAD_Pt_0_1	OD_PT50	Left_Caudate	0.0250014	0.012435	30666	0.14792	1
NREAD_Pt_0_1	OD_PT50	Left_VentralDC	0.0275791	0.0122581	30666	0.14792	1
NREAD_Pt_0_1	OD_PT50	lh_paracentral	0.0237748	0.0120374	30666	0.14792	1
NREAD_Pt_0_1	OD_PT50	lh_postcentral	0.0233612	0.0122885	30666	0.14792	1
NREAD_Pt_0_1	OD_PT50	lh_superiorparietal	0.0278437	0.0118899	30666	0.14792	1
NREAD_Pt_0_1	OD_PT50	rh_rostralmiddlefrontal	0.020858	0.0127065	30666	0.14792	1
NREAD_Pt_0_01	OD_CT30	rh_frontalpole	0.00872053	0.014684	30666	0.148249	0.741245
DYS_Pt_0_001	MD_PT50	Right_Pallidum	0.00174752	-0.0162482	30666	0.148539	0.148539
WR_Pt_0_01	MD_PT50	rh_rostralmiddlefrontal	0.00176355	-0.0170329	30666	0.149901	0.149901
DYS_Pt_0_5	SC_PT50	rh_parahippocampal	0.0588115	-0.00976421	30666	0.151484	1
PA_Pt_0_05	ICVF_CT30	Brain_Stem	0.142764	-0.00825654	30666	0.151686	1
PA_Pt_e05	ISOVF_CT30	Left_Hippocampus	0.0327998	-0.0111439	30666	0.151866	1
PA_Pt_e05	ISOVF_CT30	lh_bankssts	0.0339466	-0.0113896	30666	0.151866	1
PA_Pt_e05	ISOVF_CT30	lh_inferiorparietal	0.0304345	-0.0115367	30666	0.151866	1
PA_Pt_e05	ISOVF_CT30	lh_inferiortemporal	0.0233402	-0.0121149	30666	0.151866	1
PA_Pt_e05	ISOVF_CT30	lh_lateraloccipital	0.0240463	-0.0116963	30666	0.151866	1
PA_Pt_e05	ISOVF_CT30	lh_pericalcarine	0.02648	-0.0114878	30666	0.151866	1
PA_Pt_e05	ISOVF_CT30	lh_superiorfrontal	0.0304014	-0.0105558	30666	0.151866	1
PA_Pt_e05	ISOVF_CT30	rh_inferiorparietal	0.0225067	-0.0117781	30666	0.151866	1
PA_Pt_e05	ISOVF_CT30	rh_lingual	0.0323781	-0.0112617	30666	0.151866	1
PA_Pt_0_1	ICVF_PT50	lh_rostralmiddlefrontal	0.0643218	-0.0098828	30666	0.151871	1
DYS_Pt_e05	SC_PT50	Right_Pallidum	0.00357811	-0.014589	30666	0.15207	0.30414
PA_Pt_0_1	ISOVF_PT50	Left_Putamen	0.0304535	-0.0109396	30666	0.152268	1
PA_Pt_5e05	ISOVF_PT50	rh_lateralorbitofrontal	0.0360547	-0.0111912	30666	0.153233	1
SP_Pt_0_01	FA_PT50	rh_rostralanteriorcingulate	0.00180789	0.0173352	30666	0.15367	0.15367
NREAD_Pt_0_01	MD_CT30	lh_bankssts	0.0614886	-0.0100611	30666	0.153722	1
DYS_Pt_0_5	SC_PT50	rh_cuneus	0.0618692	0.0100307	30666	0.154673	1
PA_Pt_5e05	OD_CT30	Left_Pallidum	0.00364562	0.0154518	30666	0.154939	0.309878
SP_Pt_1	ISOVF_CT30	lh_lingual	0.0657886	-0.00952122	30666	0.155334	1
DYS_Pt_5e05	MD_PT50	Left_Caudate	0.0289481	-0.010977	30666	0.155593	1
DYS_Pt_5e05	MD_PT50	rh_lateralorbitofrontal	0.0289842	-0.0118531	30666	0.155593	1
DYS_Pt_5e05	MD_PT50	rh_supramarginal	0.0292882	-0.0119342	30666	0.155593	1
SP_Pt_0_05	ISOVF_PT50	rh_isthmuscingulate	0.0733606	-0.00932437	30666	0.155891	1
DYS_Pt_0_01	ICVF_PT50	lh_pericalcarine	0.00183574	0.0173855	30666	0.156038	0.156038
NREAD_Pt_0_5	ISOVF_PT50	lh_bankssts	0.0826551	-0.00948449	30666	0.156126	1
NREAD_Pt_0_5	ISOVF_CT30	Left_Caudate	0.092094	-0.00842167	30666	0.15656	1
DYS_Pt_5e08	SC_CT30	Right_Pallidum	0.00221291	-0.0153561	30666	0.156842	0.188097
DYS_Pt_5e08	SC_CT30	rh_insula	0.00369041	-0.0143597	30666	0.156842	0.313685
WR_Pt_0_05	ISOVF_CT30	Right_Amygdala	0.119979	-0.00865331	30666	0.156895	1
PA_Pt_5e05	MD_CT30	Left_Putamen	0.0705627	-0.00916919	30666	0.158023	1
PA_Pt_5e05	MD_CT30	Right_Hippocampus	0.0670524	-0.00953549	30666	0.158023	1
PA_Pt_5e05	MD_CT30	lh_precentral	0.0743638	-0.00918667	30666	0.158023	1
PA_Pt_5e05	MD_CT30	rh_lateralorbitofrontal	0.0674181	-0.0095851	30666	0.158023	1
PA_Pt_5e05	MD_CT30	rh_parsorbitalis	0.0721706	-0.00946114	30666	0.158023	1
PA_Pt_5e05	MD_CT30	rh_superiorparietal	0.0741014	-0.00944483	30666	0.158023	1
NREAD_Pt_0_1	OD_PT50	lh_fusiform	0.0316239	0.0118027	30666	0.15812	1
SP_Pt_0_1	ISOVF_PT50	rh_paracentral	0.0316688	-0.0108306	30666	0.158344	1
SP_Pt_0_1	ISOVF_PT50	rh_pericalcarine	0.0280661	-0.0118805	30666	0.158344	1
SP_Pt_0_1	ISOVF_PT50	rh_supramarginal	0.0308716	-0.0113058	30666	0.158344	1
SP_Pt_0_1	ISOVF_PT50	rh_frontalpole	0.0288295	-0.0120878	30666	0.158344	1
PA_Pt_0_1	FA_CT30	lh_fusiform	0.0747324	-0.00975516	30666	0.158806	1
PA_Pt_e05	ISOVF_PT50	Left_Putamen	0.0652543	-0.00931798	30666	0.159083	1
PA_Pt_e05	ISOVF_PT50	Right_VentralDC	0.0652361	-0.00943604	30666	0.159083	1
PA_Pt_e05	ISOVF_PT50	lh_bankssts	0.0552533	-0.0104394	30666	0.159083	1
PA_Pt_e05	ISOVF_PT50	lh_caudalanteriorcingulate	0.0614419	-0.00971089	30666	0.159083	1
PA_Pt_e05	ISOVF_PT50	lh_cuneus	0.0634717	-0.00986329	30666	0.159083	1
PA_Pt_e05	ISOVF_PT50	lh_parsorbitalis	0.0610985	-0.0100079	30666	0.159083	1
PA_Pt_e05	ISOVF_PT50	rh_inferiortemporal	0.0655049	-0.00971161	30666	0.159083	1
PA_Pt_e05	ISOVF_PT50	rh_middletemporal	0.0544111	-0.0100715	30666	0.159083	1
NREAD_Pt_0_05	ICVF_PT50	Left_Pallidum	0.00749078	0.0151738	30666	0.15985	0.636716
NREAD_Pt_0_05	ICVF_PT50	lh_paracentral	0.00752233	0.0146303	30666	0.15985	0.639398
WR_Pt_0_05	ISOVF_PT50	rh_temporalpole	0.128238	-0.00859102	30666	0.160297	1
PA_Pt_5e05	ISOVF_PT50	lh_supramarginal	0.0397693	-0.0110975	30666	0.160971	1
SP_Pt_0_05	ICVF_PT50	Right_Caudate	0.00190033	-0.0170468	30666	0.161528	0.161528
WR_Pt_1e05	FA_CT30	rh_posteriorcingulate	0.0152312	-0.0135099	30666	0.161831	1
PA_Pt_5e05	ISOVF_CT30	lh_entorhinal	0.0480821	-0.0112155	30666	0.163479	1
DYS_Pt_0_5	SC_CT30	lh_entorhinal	0.0654668	-0.00994031	30666	0.163667	1
PA_Pt_0_1	ISOVF_PT50	rh_parstriangularis	0.0462244	-0.0102284	30666	0.163711	1
DYS_Pt_0_5	FA_PT50	rh_rostralanteriorcingulate	0.00771056	-0.0148463	30666	0.163849	0.655397
DYS_Pt_0_5	FA_PT50	rh_transversetemporal	0.00700788	-0.0152691	30666	0.163849	0.59567	Volume
DYS_Pt_e05	ISOVF_PT50	lh_rostralanteriorcingulate	0.00193077	-0.0162824	30666	0.164116	0.164116
NREAD_Pt_e05	SC_PT50	Left_Thalamus_Proper	0.00772768	0.0111552	30666	0.164213	0.656853
NREAD_Pt_e05	SC_PT50	lh_superiorparietal	0.00767027	0.0118829	30666	0.164213	0.651973
NREAD_Pt_e05	SC_PT50	rh_inferiorparietal	0.00477714	0.0138013	30666	0.164213	0.406057
NREAD_Pt_e05	SC_PT50	rh_superiorparietal	0.0064566	0.0125877	30666	0.164213	0.548811
DYS_Pt_0_05	ICVF_PT50	rh_rostralanteriorcingulate	0.00966681	-0.0145389	30666	0.164336	0.821679
NREAD_Pt_0_05	OD_PT50	lh_posteriorcingulate	0.0657552	0.0101547	30666	0.164388	1
NREAD_Pt_0_05	SC_CT30	rh_medialorbitofrontal	0.00774662	-0.0136869	30666	0.164616	0.658462
NREAD_Pt_0_1	OD_CT30	lh_superiorfrontal	0.00968976	0.0137691	30666	0.164726	0.823629
PA_Pt_5e05	OD_PT50	Left_VentralDC	0.00194272	0.0172008	30666	0.165131	0.165131
PA_Pt_e05	ISOVF_PT50	rh_rostralanteriorcingulate	0.0777225	-0.00952318	30666	0.16516	1
PA_Pt_e05	ISOVF_PT50	rh_superiorfrontal	0.0776961	-0.00871544	30666	0.16516	1
WR_Pt_0_001	SC_PT50	rh_inferiorparietal	0.00388699	-0.014132	30666	0.165197	0.330394
SP_Pt_0_5	ISOVF_PT50	lh_parstriangularis	0.0642713	-0.00964025	30666	0.165254	1
SP_Pt_0_5	ISOVF_PT50	lh_precuneus	0.0661017	-0.00954562	30666	0.165254	1
SP_Pt_5e05	OD_CT30	rh_entorhinal	0.00780004	0.0138969	30666	0.165751	0.663003
SP_Pt_5e05	OD_CT30	rh_insula	0.00738361	0.0140656	30666	0.165751	0.627607
DYS_Pt_0_5	FA_PT50	lh_transversetemporal	0.0097553	-0.0145646	30666	0.16584	0.829201	Thickness
SP_Pt_0_1	ISOVF_CT30	Left_Pallidum	0.0294369	-0.0113555	30666	0.166673	1
SP_Pt_0_1	ISOVF_CT30	lh_parsopercularis	0.0290789	-0.011202	30666	0.166673	1
SP_Pt_0_1	ISOVF_CT30	lh_superiorparietal	0.0262978	-0.0115971	30666	0.166673	1
SP_Pt_0_1	ISOVF_CT30	rh_lateralorbitofrontal	0.0241194	-0.0121947	30666	0.166673	1
SP_Pt_0_1	ISOVF_CT30	rh_parsopercularis	0.0193522	-0.0118069	30666	0.166673	1
SP_Pt_0_1	ISOVF_CT30	rh_parstriangularis	0.0209744	-0.0119455	30666	0.166673	1
SP_Pt_0_1	ISOVF_CT30	rh_pericalcarine	0.0333347	-0.0111861	30666	0.166673	1
SP_Pt_0_1	ISOVF_CT30	rh_precuneus	0.0199668	-0.0117065	30666	0.166673	1
SP_Pt_0_1	ISOVF_CT30	rh_supramarginal	0.0232247	-0.0116796	30666	0.166673	1
SP_Pt_0_1	ISOVF_CT30	rh_insula	0.0328745	-0.0110637	30666	0.166673	1
PA_Pt_0_05	MD_PT50	lh_superiorfrontal	0.00196424	0.0159563	30666	0.16696	0.16696
DYS_Pt_0_01	SC_PT50	lh_lateraloccipital	0.0487916	-0.00962341	30666	0.167435	1	Volume, Thickness
DYS_Pt_0_01	SC_PT50	rh_rostralmiddlefrontal	0.0492454	-0.00925574	30666	0.167435	1
SP_Pt_0_5	ISOVF_CT30	rh_isthmuscingulate	0.0988367	-0.00828465	30666	0.168022	1
WR_Pt_0_01	MD_PT50	Right_Hippocampus	0.00395905	-0.016167	30666	0.16826	0.336519
NREAD_Pt_e05	SC_CT30	Left_Thalamus_Proper	0.0046423	0.0117797	30666	0.168453	0.394596
NREAD_Pt_e05	SC_CT30	lh_superiorparietal	0.00792719	0.01183	30666	0.168453	0.673812
NREAD_Pt_e05	SC_CT30	rh_inferiorparietal	0.0054369	0.0135185	30666	0.168453	0.462137
NREAD_Pt_e05	SC_CT30	rh_superiorparietal	0.00603346	0.0126945	30666	0.168453	0.512844
PA_Pt_0_05	MD_PT50	lh_paracentral	0.00398074	0.0155668	30666	0.169181	0.338363
NREP_Pt_5e05	OD_PT50	Right_Accumbens_area	0.0019922	-0.0173268	30666	0.169337	0.169337
SP_Pt_0_5	ISOVF_CT30	rh_parsorbitalis	0.101881	-0.00889351	30666	0.169801	1
DYS_Pt_5e05	MD_PT50	Right_Thalamus_Proper	0.0340164	-0.0109138	30666	0.170082	1
DYS_Pt_5e08	OD_PT50	Right_Putamen	0.0500274	0.010138	30666	0.170093	1
NREAD_Pt_5e05	ISOVF_CT30	lh_cuneus	0.00200424	-0.0160516	30666	0.17036	0.17036
DYS_Pt_0_001	OD_PT50	Left_Thalamus_Proper	0.0296957	0.0113692	30666	0.171101	1
DYS_Pt_0_001	OD_PT50	lh_supramarginal	0.0270835	0.0121443	30666	0.171101	1
DYS_Pt_0_001	OD_PT50	rh_precuneus	0.0252112	0.0122227	30666	0.171101	1
DYS_Pt_0_001	OD_PT50	rh_superiorfrontal	0.0301943	0.0118108	30666	0.171101	1
DYS_Pt_5e05	ISOVF_CT30	lh_rostralanteriorcingulate	0.00403301	-0.0150877	30666	0.171403	0.342806
DYS_Pt_5e05	ISOVF_CT30	rh_rostralanteriorcingulate	0.0037022	-0.0156875	30666	0.171403	0.314687
DYS_Pt_e05	MD_PT50	lh_bankssts	0.101106	-0.00912868	30666	0.17188	1
NREAD_Pt_5e05	OD_PT50	Left_Thalamus_Proper	0.0687561	0.00950944	30666	0.17189	1
NREAD_Pt_0_01	MD_CT30	lh_lingual	0.0813189	-0.00857741	30666	0.172803	1
NREAD_Pt_0_01	MD_CT30	rh_fusiform	0.0810724	-0.00920729	30666	0.172803	1
NREAD_Pt_0_1	ISOVF_PT50	lh_caudalanteriorcingulate	0.0813202	-0.00907512	30666	0.172805	1
NREAD_Pt_5e05	OD_CT30	Right_Thalamus_Proper	0.018427	0.0120224	30666	0.174033	1
NREAD_Pt_0_1	OD_PT50	Right_Pallidum	0.041061	0.0114164	30666	0.174509	1
PA_Pt_0_01	OD_PT50	lh_supramarginal	0.00410709	-0.0157575	30666	0.174551	0.349103
DYS_Pt_5e05	MD_PT50	lh_rostralanteriorcingulate	0.0410804	-0.0110388	30666	0.174592	1
DYS_Pt_5e05	MD_PT50	rh_superiorparietal	0.0394622	-0.0110411	30666	0.174592	1
WR_Pt_0_001	ISOVF_CT30	Right_VentralDC	0.0942319	-0.00867057	30666	0.174848	1
WR_Pt_0_001	ISOVF_CT30	lh_lateraloccipital	0.090801	-0.00876976	30666	0.174848	1
WR_Pt_0_001	ISOVF_CT30	lh_medialorbitofrontal	0.0946357	-0.00917855	30666	0.174848	1
WR_Pt_0_001	ISOVF_CT30	lh_parstriangularis	0.0966806	-0.00859941	30666	0.174848	1
NREP_Pt_1	ICVF_PT50	Right_Pallidum	0.035091	0.011926	30666	0.175455	1
NREP_Pt_1	ICVF_PT50	lh_precentral	0.0295425	0.0121675	30666	0.175455	1
NREP_Pt_1	ICVF_PT50	rh_bankssts	0.0349908	0.0120117	30666	0.175455	1
NREP_Pt_1	ICVF_PT50	rh_precentral	0.0342491	0.0119732	30666	0.175455	1
NREP_Pt_1	FA_PT50	lh_inferiortemporal	0.0245837	0.0122704	30666	0.17558	1
NREP_Pt_1	FA_PT50	lh_isthmuscingulate	0.035116	0.0119377	30666	0.17558	1
NREP_Pt_1	FA_PT50	lh_middletemporal	0.0338687	0.0113832	30666	0.17558	1
NREP_Pt_1	FA_PT50	lh_precentral	0.0181234	0.0133118	30666	0.17558	1
NREP_Pt_1	FA_PT50	lh_superiortemporal	0.0261951	0.0123979	30666	0.17558	1
NREP_Pt_1	FA_PT50	lh_insula	0.0326006	0.0120008	30666	0.17558	1
NREP_Pt_1	FA_PT50	rh_bankssts	0.0306877	0.0122444	30666	0.17558	1
NREP_Pt_1	FA_PT50	rh_precentral	0.0295207	0.012379	30666	0.17558	1
NREP_Pt_1	FA_PT50	rh_superiorparietal	0.0224511	0.0127647	30666	0.17558	1
NREP_Pt_1	FA_PT50	rh_superiortemporal	0.0201217	0.013146	30666	0.17558	1
DYS_Pt_1	FA_CT30	Left_Putamen	0.0311097	-0.0122366	30666	0.175614	1
DYS_Pt_1	FA_CT30	Right_Thalamus_Proper	0.035383	-0.0119864	30666	0.175614	1
DYS_Pt_1	FA_CT30	Right_Pallidum	0.03948	-0.0116706	30666	0.175614	1
DYS_Pt_1	FA_CT30	lh_caudalmiddlefrontal	0.0412773	-0.0113466	30666	0.175614	1
DYS_Pt_1	FA_CT30	lh_inferiorparietal	0.0219181	-0.0125823	30666	0.175614	1	Thickness
DYS_Pt_1	FA_CT30	lh_middletemporal	0.0471417	-0.0110396	30666	0.175614	1
DYS_Pt_1	FA_CT30	lh_parsopercularis	0.0286655	-0.0119512	30666	0.175614	1
DYS_Pt_1	FA_CT30	lh_parsorbitalis	0.0537173	-0.0103421	30666	0.175614	1
DYS_Pt_1	FA_CT30	lh_superiortemporal	0.0508639	-0.0110402	30666	0.175614	1
DYS_Pt_1	FA_CT30	rh_caudalanteriorcingulate	0.0250836	-0.0125788	30666	0.175614	1
DYS_Pt_1	FA_CT30	rh_caudalmiddlefrontal	0.0352225	-0.0117525	30666	0.175614	1
DYS_Pt_1	FA_CT30	rh_inferiorparietal	0.0455287	-0.0110176	30666	0.175614	1
DYS_Pt_1	FA_CT30	rh_inferiortemporal	0.0495738	-0.010887	30666	0.175614	1	Thickness
DYS_Pt_1	FA_CT30	rh_isthmuscingulate	0.0481633	-0.0112629	30666	0.175614	1
DYS_Pt_1	FA_CT30	rh_lingual	0.0224688	-0.012732	30666	0.175614	1
DYS_Pt_1	FA_CT30	rh_parstriangularis	0.0537121	-0.0104794	30666	0.175614	1
DYS_Pt_1	FA_CT30	rh_pericalcarine	0.0464146	-0.0110631	30666	0.175614	1	Volume, Area
DYS_Pt_1	FA_CT30	rh_superiorparietal	0.0348415	-0.0119054	30666	0.175614	1
DYS_Pt_e05	OD_CT30	lh_bankssts	0.103395	0.00883618	30666	0.175772	1
NREP_Pt_0_1	ICVF_PT50	rh_parstriangularis	0.0351722	0.0118597	30666	0.175861	1
DYS_Pt_0_5	SC_CT30	lh_transversetemporal	0.0726113	-0.00960257	30666	0.176342	1
PA_Pt_0_01	ICVF_PT50	rh_frontalpole	0.155621	-0.00776544	30666	0.17637	1
WR_Pt_0_001	ISOVF_CT30	rh_lingual	0.0996384	-0.00866957	30666	0.176443	1
PA_Pt_0_1	ISOVF_CT30	rh_temporalpole	0.141452	-0.00830449	30666	0.176815	1
NREAD_Pt_0_1	SC_PT50	Left_Caudate	0.00833073	-0.0140682	30666	0.177028	0.708112
NREP_Pt_0_1	FA_PT50	lh_inferiortemporal	0.0166848	0.0130454	30666	0.177276	1
NREP_Pt_0_1	FA_PT50	lh_precentral	0.0148334	0.0137036	30666	0.177276	1
DYS_Pt_0_5	FA_CT30	Right_Putamen	0.00986273	-0.0146461	30666	0.177393	0.838332
DYS_Pt_0_5	FA_CT30	Right_VentralDC	0.00923964	-0.0148672	30666	0.177393	0.785369	Volume
DYS_Pt_0_5	FA_CT30	lh_precentral	0.0104349	-0.0143659	30666	0.177393	0.886964	Thickness
DYS_Pt_0_5	FA_CT30	rh_precentral	0.00929733	-0.0147243	30666	0.177393	0.790273	Thickness
DYS_Pt_0_5	FA_CT30	rh_rostralanteriorcingulate	0.00889784	-0.0146889	30666	0.177393	0.756316
DYS_Pt_0_01	FA_PT50	lh_parsorbitalis	0.0208844	-0.0126421	30666	0.177518	1
DYS_Pt_e05	MD_PT50	lh_postcentral	0.106725	-0.00896599	30666	0.177875	1
DYS_Pt_0_1	SC_CT30	rh_rostralmiddlefrontal	0.0565227	-0.00898535	30666	0.177942	1
NREAD_Pt_0_05	ICVF_PT50	Right_Thalamus_Proper	0.0328205	0.0118283	30666	0.177981	1
NREAD_Pt_0_05	ICVF_PT50	lh_medialorbitofrontal	0.0335022	0.0116766	30666	0.177981	1
NREAD_Pt_0_05	ICVF_PT50	lh_precentral	0.0285714	0.0122215	30666	0.177981	1
NREAD_Pt_0_05	ICVF_PT50	rh_rostralmiddlefrontal	0.0334406	0.0115726	30666	0.177981	1
NREAD_Pt_0_01	OD_PT50	rh_insula	0.0167585	0.0131703	30666	0.178059	1
PA_Pt_5e05	ISOVF_CT30	lh_precentral	0.0551226	-0.00982944	30666	0.178083	1
PA_Pt_5e05	ISOVF_CT30	rh_cuneus	0.0609403	-0.0100834	30666	0.178083	1
PA_Pt_5e05	ISOVF_CT30	rh_fusiform	0.058962	-0.0102276	30666	0.178083	1
PA_Pt_5e05	ISOVF_CT30	rh_lateraloccipital	0.0612868	-0.00989963	30666	0.178083	1
PA_Pt_5e05	ISOVF_CT30	rh_postcentral	0.0628527	-0.00938679	30666	0.178083	1
PA_Pt_0_1	MD_CT30	rh_frontalpole	0.002109	0.0163065	30666	0.179265	0.179265
SP_Pt_0_1	ISOVF_CT30	rh_inferiorparietal	0.0720348	-0.00930348	30666	0.180087	1
SP_Pt_0_1	ISOVF_CT30	rh_superiorparietal	0.071133	-0.00922588	30666	0.180087	1
WR_Pt_0_001	SC_CT30	rh_inferiorparietal	0.00424137	-0.0139161	30666	0.180258	0.360516
PA_Pt_0_1	ISOVF_CT30	rh_inferiorparietal	0.148684	-0.00745585	30666	0.180545	1
WR_Pt_5e05	ISOVF_PT50	Left_Accumbens_area	0.00212478	-0.0173507	30666	0.180606	0.180606
PA_Pt_0_1	MD_PT50	rh_rostralmiddlefrontal	0.00850783	0.0142972	30666	0.180791	0.723166
DYS_Pt_5e08	MD_CT30	lh_inferiorparietal	0.106682	-0.00865389	30666	0.18136	1
DYS_Pt_5e08	MD_CT30	rh_supramarginal	0.105449	-0.00857238	30666	0.18136	1
DYS_Pt_0_5	ISOVF_CT30	Right_VentralDC	0.0320102	0.0111399	30666	0.181362	1	Volume
DYS_Pt_0_5	ISOVF_CT30	lh_insula	0.0362724	0.0110367	30666	0.181362	1	Volume, Thickness
DYS_Pt_0_5	ISOVF_CT30	rh_fusiform	0.0358558	0.0113953	30666	0.181362	1
PA_Pt_0_01	FA_CT30	lh_parsorbitalis	0.108915	-0.00856757	30666	0.181525	1
PA_Pt_0_01	FA_CT30	lh_supramarginal	0.106926	-0.00911448	30666	0.181525	1
SP_Pt_0_01	FA_CT30	rh_parsopercularis	0.0857453	0.00932913	30666	0.182209	1
SP_Pt_1e05	OD_CT30	lh_parsopercularis	0.0521746	0.0106126	30666	0.183081	1
SP_Pt_1e05	OD_CT30	lh_pericalcarine	0.0505014	0.0105771	30666	0.183081	1
SP_Pt_1e05	OD_CT30	lh_superiorfrontal	0.0538473	0.0102337	30666	0.183081	1
NREP_Pt_0_1	ICVF_PT50	Brain_Stem	0.046264	0.0111778	30666	0.183487	1
NREP_Pt_0_1	ICVF_PT50	Right_Hippocampus	0.0412117	0.0115717	30666	0.183487	1
NREP_Pt_0_1	ICVF_PT50	lh_middletemporal	0.0479573	0.0106514	30666	0.183487	1
NREP_Pt_0_1	ICVF_PT50	lh_postcentral	0.051808	0.010805	30666	0.183487	1
NREP_Pt_0_1	ICVF_PT50	rh_fusiform	0.0509373	0.0109444	30666	0.183487	1
NREP_Pt_0_1	ICVF_PT50	rh_postcentral	0.0455735	0.0111124	30666	0.183487	1
NREP_Pt_0_1	ICVF_PT50	rh_transversetemporal	0.0483557	0.0111477	30666	0.183487	1
NREAD_Pt_0_05	ICVF_PT50	lh_isthmuscingulate	0.0367987	0.0118427	30666	0.183993	1
WR_Pt_0_001	ISOVF_CT30	rh_inferiortemporal	0.108351	-0.0084897	30666	0.184197	1
SP_Pt_0_1	ISOVF_PT50	lh_lateraloccipital	0.0694169	-0.00951709	30666	0.184389	1
NREAD_Pt_0_01	MD_PT50	lh_superiortemporal	0.00217327	-0.0163678	30666	0.184728	0.184728
PA_Pt_e05	ICVF_PT50	rh_caudalanteriorcingulate	0.00218299	-0.0170214	30666	0.185554	0.185554
NREAD_Pt_0_05	SC_PT50	rh_medialorbitofrontal	0.00877181	-0.0135119	30666	0.186401	0.745604
SP_Pt_0_5	ISOVF_CT30	rh_posteriorcingulate	0.120884	-0.00803292	30666	0.186821	1
WR_Pt_1	ISOVF_CT30	rh_temporalpole	0.158547	-0.00802576	30666	0.187174	1
WR_Pt_1e05	ICVF_PT50	Left_Pallidum	0.110133	-0.00905581	30666	0.187226	1
PA_Pt_0_05	OD_PT50	Right_Hippocampus	0.00220672	-0.0170547	30666	0.187571	0.187571
NREAD_Pt_0_05	ICVF_PT50	Left_Thalamus_Proper	0.0520609	0.0107604	30666	0.190252	1
NREAD_Pt_0_05	ICVF_PT50	lh_caudalmiddlefrontal	0.0551835	0.0104153	30666	0.190252	1
NREAD_Pt_0_05	ICVF_PT50	lh_parsopercularis	0.0500285	0.01091	30666	0.190252	1
NREAD_Pt_0_05	ICVF_PT50	lh_parsorbitalis	0.0559565	0.0104795	30666	0.190252	1
NREAD_Pt_0_05	ICVF_PT50	lh_posteriorcingulate	0.0511656	0.0109265	30666	0.190252	1
NREAD_Pt_0_05	ICVF_PT50	rh_lateraloccipital	0.0492415	0.0109038	30666	0.190252	1
NREAD_Pt_0_05	ICVF_PT50	rh_superiorfrontal	0.0557841	0.0104915	30666	0.190252	1
SP_Pt_1	ISOVF_PT50	rh_parstriangularis	0.0765313	-0.00911037	30666	0.191328	1
PA_Pt_e05	ISOVF_PT50	lh_lateralorbitofrontal	0.112668	-0.00867033	30666	0.191536	1
NREAD_Pt_0_5	OD_PT50	lh_superiorfrontal	0.00451149	0.0155843	30666	0.191738	0.383476
NREAD_Pt_0_5	OD_PT50	rh_rostralanteriorcingulate	0.00236933	0.0172765	30666	0.191738	0.201393
NREAD_Pt_0_1	MD_CT30	lh_superiorfrontal	0.113008	-0.00781093	30666	0.192114	1
NREAD_Pt_0_01	MD_CT30	Right_VentralDC	0.1131	-0.00828781	30666	0.19227	1
DYS_Pt_5e05	MD_PT50	Left_Pallidum	0.0556672	-0.00971114	30666	0.193113	1
DYS_Pt_5e05	MD_PT50	lh_parsopercularis	0.0500618	-0.0104671	30666	0.193113	1
DYS_Pt_5e05	MD_PT50	lh_posteriorcingulate	0.0556808	-0.0104839	30666	0.193113	1
DYS_Pt_5e05	MD_PT50	lh_insula	0.0507829	-0.0105513	30666	0.193113	1
DYS_Pt_5e05	MD_PT50	rh_insula	0.0567979	-0.0100301	30666	0.193113	1
WR_Pt_1e05	FA_CT30	Left_Caudate	0.026005	-0.0122145	30666	0.193188	1
WR_Pt_1e05	FA_CT30	Left_Pallidum	0.0535462	-0.0109221	30666	0.193188	1
WR_Pt_1e05	FA_CT30	Right_Pallidum	0.0526227	-0.0109572	30666	0.193188	1
WR_Pt_1e05	FA_CT30	lh_inferiorparietal	0.0458193	-0.0109375	30666	0.193188	1
WR_Pt_1e05	FA_CT30	lh_isthmuscingulate	0.0590929	-0.0106744	30666	0.193188	1
WR_Pt_1e05	FA_CT30	lh_lateralorbitofrontal	0.0263262	-0.0120802	30666	0.193188	1
WR_Pt_1e05	FA_CT30	lh_posteriorcingulate	0.0427576	-0.0113981	30666	0.193188	1
WR_Pt_1e05	FA_CT30	lh_precentral	0.047982	-0.0110646	30666	0.193188	1
WR_Pt_1e05	FA_CT30	lh_rostralmiddlefrontal	0.0348098	-0.0112505	30666	0.193188	1
WR_Pt_1e05	FA_CT30	lh_superiorparietal	0.0508968	-0.0109345	30666	0.193188	1
WR_Pt_1e05	FA_CT30	rh_lateraloccipital	0.0360095	-0.0113763	30666	0.193188	1
WR_Pt_1e05	FA_CT30	rh_parstriangularis	0.0340205	-0.0114869	30666	0.193188	1
WR_Pt_1e05	FA_CT30	rh_precuneus	0.0460033	-0.0110801	30666	0.193188	1
WR_Pt_1e05	FA_CT30	rh_rostralanteriorcingulate	0.0550221	-0.0107467	30666	0.193188	1
WR_Pt_1e05	FA_CT30	rh_rostralmiddlefrontal	0.0347524	-0.0114605	30666	0.193188	1
WR_Pt_1e05	FA_CT30	rh_superiorfrontal	0.0426326	-0.0110183	30666	0.193188	1
WR_Pt_1e05	FA_CT30	rh_frontalpole	0.0589425	-0.0102781	30666	0.193188	1
WR_Pt_0_5	ISOVF_CT30	lh_pericalcarine	0.159104	-0.00734488	30666	0.193198	1
DYS_Pt_0_001	SC_PT50	lh_entorhinal	0.0183583	-0.012691	30666	0.195057	1
NREP_Pt_1	ICVF_CT30	lh_superiorparietal	0.0782937	0.00979078	30666	0.195734	1
DYS_Pt_0_01	SC_CT30	lh_inferiortemporal	0.0783716	-0.00855245	30666	0.195929	1
NREAD_Pt_0_1	OD_PT50	rh_frontalpole	0.0692066	0.0101974	30666	0.196086	1
PA_Pt_e05	ISOVF_CT30	lh_superiortemporal	0.0925979	-0.00899848	30666	0.196771	1
PA_Pt_e05	ISOVF_CT30	rh_precentral	0.0906392	-0.00847073	30666	0.196771	1
DYS_Pt_0_5	FA_PT50	Right_Thalamus_Proper	0.0139165	-0.0138569	30666	0.19715	1
NREAD_Pt_0_01	ISOVF_CT30	Left_Putamen	0.0576347	-0.00975102	30666	0.197354	1
NREAD_Pt_0_01	ISOVF_CT30	Left_Pallidum	0.0774748	-0.00919463	30666	0.197354	1
NREAD_Pt_0_01	ISOVF_CT30	Right_Putamen	0.0544034	-0.00966108	30666	0.197354	1
NREAD_Pt_0_01	ISOVF_CT30	lh_bankssts	0.0910422	-0.00908114	30666	0.197354	1
NREAD_Pt_0_01	ISOVF_CT30	lh_caudalanteriorcingulate	0.0448134	-0.0104509	30666	0.197354	1
NREAD_Pt_0_01	ISOVF_CT30	lh_fusiform	0.0869981	-0.00907031	30666	0.197354	1
NREAD_Pt_0_01	ISOVF_CT30	lh_inferiortemporal	0.0335322	-0.0113617	30666	0.197354	1
NREAD_Pt_0_01	ISOVF_CT30	lh_middletemporal	0.0216508	-0.0122677	30666	0.197354	1
NREAD_Pt_0_01	ISOVF_CT30	lh_paracentral	0.0513768	-0.00974616	30666	0.197354	1
NREAD_Pt_0_01	ISOVF_CT30	lh_parsopercularis	0.0250605	-0.0114847	30666	0.197354	1
NREAD_Pt_0_01	ISOVF_CT30	lh_parsorbitalis	0.0893525	-0.00912342	30666	0.197354	1
NREAD_Pt_0_01	ISOVF_CT30	lh_parstriangularis	0.0673463	-0.0094719	30666	0.197354	1
NREAD_Pt_0_01	ISOVF_CT30	lh_postcentral	0.0554482	-0.00995562	30666	0.197354	1
NREAD_Pt_0_01	ISOVF_CT30	lh_posteriorcingulate	0.0708453	-0.00904796	30666	0.197354	1
NREAD_Pt_0_01	ISOVF_CT30	lh_precentral	0.0867541	-0.00877923	30666	0.197354	1
NREAD_Pt_0_01	ISOVF_CT30	lh_precuneus	0.088431	-0.00877816	30666	0.197354	1
NREAD_Pt_0_01	ISOVF_CT30	lh_superiorparietal	0.0832371	-0.0090298	30666	0.197354	1
NREAD_Pt_0_01	ISOVF_CT30	lh_superiortemporal	0.0696176	-0.00971291	30666	0.197354	1
NREAD_Pt_0_01	ISOVF_CT30	lh_supramarginal	0.0146109	-0.0130634	30666	0.197354	1
NREAD_Pt_0_01	ISOVF_CT30	lh_frontalpole	0.0928724	-0.00928703	30666	0.197354	1
NREAD_Pt_0_01	ISOVF_CT30	lh_insula	0.0273388	-0.0116019	30666	0.197354	1
NREAD_Pt_0_01	ISOVF_CT30	rh_inferiorparietal	0.0792315	-0.00906526	30666	0.197354	1
NREAD_Pt_0_01	ISOVF_CT30	rh_inferiortemporal	0.0591654	-0.00997898	30666	0.197354	1
NREAD_Pt_0_01	ISOVF_CT30	rh_lateraloccipital	0.0609545	-0.00991356	30666	0.197354	1
NREAD_Pt_0_01	ISOVF_CT30	rh_lateralorbitofrontal	0.0736166	-0.0096609	30666	0.197354	1
NREAD_Pt_0_01	ISOVF_CT30	rh_medialorbitofrontal	0.0703525	-0.00984882	30666	0.197354	1
NREAD_Pt_0_01	ISOVF_CT30	rh_middletemporal	0.0298842	-0.0114136	30666	0.197354	1
NREAD_Pt_0_01	ISOVF_CT30	rh_paracentral	0.0171658	-0.0116109	30666	0.197354	1
NREAD_Pt_0_01	ISOVF_CT30	rh_parsopercularis	0.0505158	-0.00985979	30666	0.197354	1
NREAD_Pt_0_01	ISOVF_CT30	rh_parsorbitalis	0.0750649	-0.00966075	30666	0.197354	1
NREAD_Pt_0_01	ISOVF_CT30	rh_postcentral	0.0291201	-0.0110109	30666	0.197354	1
NREAD_Pt_0_01	ISOVF_CT30	rh_precentral	0.0707368	-0.00905203	30666	0.197354	1
NREAD_Pt_0_01	ISOVF_CT30	rh_precuneus	0.04776	-0.00994537	30666	0.197354	1
NREAD_Pt_0_01	ISOVF_CT30	rh_rostralmiddlefrontal	0.0571117	-0.0096727	30666	0.197354	1
NREAD_Pt_0_01	ISOVF_CT30	rh_superiorparietal	0.0667761	-0.00935939	30666	0.197354	1
NREAD_Pt_0_01	ISOVF_CT30	rh_superiortemporal	0.011459	-0.0133941	30666	0.197354	0.974014
NREAD_Pt_0_01	ISOVF_CT30	rh_supramarginal	0.034378	-0.0108722	30666	0.197354	1
NREAD_Pt_0_01	ISOVF_CT30	rh_frontalpole	0.0483483	-0.010954	30666	0.197354	1
NREAD_Pt_0_01	ISOVF_CT30	rh_insula	0.0661177	-0.00951634	30666	0.197354	1
PA_Pt_e05	FA_PT50	lh_precuneus	0.00931025	-0.0143422	30666	0.197843	0.791371
PA_Pt_e05	FA_PT50	lh_rostralanteriorcingulate	0.00798411	-0.0144526	30666	0.197843	0.67865
PA_Pt_e05	FA_PT50	rh_rostralanteriorcingulate	0.00541454	-0.0154495	30666	0.197843	0.460236
WR_Pt_0_001	ISOVF_PT50	Left_Pallidum	0.0384772	-0.0102657	30666	0.198421	1
WR_Pt_0_001	ISOVF_PT50	Left_Accumbens_area	0.033593	-0.0120004	30666	0.198421	1
WR_Pt_0_001	ISOVF_PT50	lh_parsorbitalis	0.035626	-0.0112323	30666	0.198421	1
WR_Pt_0_001	ISOVF_PT50	lh_postcentral	0.0353011	-0.0111413	30666	0.198421	1
WR_Pt_0_001	ISOVF_PT50	lh_superiorparietal	0.0327603	-0.0112181	30666	0.198421	1
WR_Pt_0_001	ISOVF_PT50	lh_supramarginal	0.0314621	-0.0116095	30666	0.198421	1
WR_Pt_0_001	ISOVF_PT50	lh_temporalpole	0.0298749	-0.0119742	30666	0.198421	1
WR_Pt_0_001	ISOVF_PT50	rh_isthmuscingulate	0.0396842	-0.0107061	30666	0.198421	1
PA_Pt_0_1	MD_PT50	rh_parsorbitalis	0.0116729	0.0135922	30666	0.198439	0.992195
DYS_Pt_0_01	MD_PT50	lh_pericalcarine	0.00284491	0.0169356	30666	0.198442	0.241817
DYS_Pt_0_01	MD_PT50	lh_rostralanteriorcingulate	0.00933843	-0.0140552	30666	0.198442	0.793766	Volume
DYS_Pt_0_01	MD_PT50	lh_transversetemporal	0.00623062	-0.015405	30666	0.198442	0.529602	Thickness
DYS_Pt_0_01	MD_PT50	rh_transversetemporal	0.00722548	-0.0151582	30666	0.198442	0.614165	Volume
SP_Pt_0_1	ISOVF_PT50	lh_superiorfrontal	0.0782502	-0.00867721	30666	0.198465	1
SP_Pt_0_1	ISOVF_PT50	rh_superiorparietal	0.079386	-0.00900242	30666	0.198465	1
NREAD_Pt_0_05	FA_PT50	lh_paracentral	0.00253506	0.0165956	30666	0.198534	0.21548
NREAD_Pt_0_05	FA_PT50	rh_lateralorbitofrontal	0.00640142	0.015297	30666	0.198534	0.544121
NREAD_Pt_0_05	FA_PT50	rh_rostralanteriorcingulate	0.00700708	0.0150023	30666	0.198534	0.595602
PA_Pt_0_01	ISOVF_PT50	rh_entorhinal	0.18705	-0.00747692	30666	0.19874	1
NREAD_Pt_0_5	ISOVF_CT30	lh_isthmuscingulate	0.13106	-0.00775924	30666	0.198931	1
NREAD_Pt_0_5	ISOVF_CT30	rh_bankssts	0.129945	-0.00768562	30666	0.198931	1
NREAD_Pt_0_5	ISOVF_CT30	rh_lateralorbitofrontal	0.130746	-0.0081846	30666	0.198931	1
PA_Pt_5e05	SC_CT30	lh_precentral	0.00702585	-0.0126179	30666	0.199066	0.597198
DYS_Pt_0_05	ICVF_PT50	rh_bankssts	0.0140677	-0.013982	30666	0.199292	1
NREP_Pt_0_001	MD_PT50	rh_parahippocampal	0.00704537	-0.0145207	30666	0.199619	0.598856
PA_Pt_0_01	SC_PT50	lh_paracentral	0.00234979	0.0162761	30666	0.199732	0.199732
WR_Pt_0_001	ISOVF_PT50	rh_temporalpole	0.0423805	-0.0114203	30666	0.20013	1
NREP_Pt_0_5	FA_PT50	rh_fusiform	0.0376923	0.011538	30666	0.200241	1
NREP_Pt_0_05	ISOVF_CT30	Right_Accumbens_area	0.00236049	-0.0169192	30666	0.200641	0.200641
DYS_Pt_0_01	FA_CT30	lh_precentral	0.00749655	-0.0149745	30666	0.202061	0.637206	Thickness
DYS_Pt_0_01	FA_CT30	lh_rostralanteriorcingulate	0.00635466	-0.0153243	30666	0.202061	0.540146	Volume
DYS_Pt_0_01	FA_CT30	lh_superiortemporal	0.00950874	-0.0146392	30666	0.202061	0.808243
DYS_Pt_0_01	FA_CT30	rh_rostralanteriorcingulate	0.00596333	-0.0154152	30666	0.202061	0.506883
SP_Pt_0_1	FA_CT30	rh_lateralorbitofrontal	0.023814	0.0126023	30666	0.202419	1
NREAD_Pt_0_05	OD_PT50	lh_parstriangularis	0.0952812	0.00950181	30666	0.202473	1
NREAD_Pt_0_05	SC_CT30	lh_parahippocampal	0.0119186	-0.0132111	30666	0.202616	1
DYS_Pt_0_001	ISOVF_CT30	Left_Amygdala	0.00238413	-0.0163267	30666	0.202651	0.202651
PA_Pt_0_1	ISOVF_PT50	Right_Pallidum	0.119644	-0.00767488	30666	0.203394	1
NREAD_Pt_0_1	MD_CT30	lh_supramarginal	0.128304	-0.0081653	30666	0.203893	1
NREAD_Pt_0_1	MD_CT30	rh_parsorbitalis	0.129532	-0.00799527	30666	0.203893	1
PA_Pt_0_1	MD_CT30	lh_rostralmiddlefrontal	0.00480018	0.0146099	30666	0.204007	0.408015
DYS_Pt_1	FA_CT30	lh_bankssts	0.0814366	-0.00978211	30666	0.204094	1
DYS_Pt_1	FA_CT30	lh_inferiortemporal	0.0901442	-0.00949693	30666	0.204094	1
DYS_Pt_1	FA_CT30	lh_superiorparietal	0.0825416	-0.00974745	30666	0.204094	1
DYS_Pt_1	FA_CT30	lh_insula	0.0832653	-0.00975706	30666	0.204094	1
DYS_Pt_1	FA_CT30	rh_parsorbitalis	0.0951932	-0.00901528	30666	0.204094	1
DYS_Pt_1	FA_CT30	rh_precuneus	0.091801	-0.00938513	30666	0.204094	1
DYS_Pt_1	FA_CT30	rh_rostralmiddlefrontal	0.0960444	-0.00905693	30666	0.204094	1
DYS_Pt_1	FA_CT30	rh_superiortemporal	0.0828831	-0.00979676	30666	0.204094	1
DYS_Pt_1	FA_CT30	rh_temporalpole	0.0861946	0.00950891	30666	0.204094	1
DYS_Pt_1	FA_CT30	rh_transversetemporal	0.0872519	-0.0097643	30666	0.204094	1
DYS_Pt_5e05	OD_CT30	lh_superiorfrontal	0.120086	0.00825885	30666	0.204147	1
PA_Pt_e05	FA_CT30	lh_caudalanteriorcingulate	0.00462517	-0.0159138	30666	0.204321	0.393139
PA_Pt_e05	FA_CT30	lh_medialorbitofrontal	0.0192302	-0.0127171	30666	0.204321	1
PA_Pt_e05	FA_CT30	lh_precuneus	0.0145581	-0.0137345	30666	0.204321	1
PA_Pt_e05	FA_CT30	lh_insula	0.0186921	-0.0132076	30666	0.204321	1
PA_Pt_e05	FA_CT30	rh_caudalanteriorcingulate	0.0183451	-0.0132046	30666	0.204321	1
PA_Pt_e05	FA_CT30	rh_posteriorcingulate	0.0138249	-0.0136973	30666	0.204321	1
PA_Pt_e05	FA_CT30	rh_precuneus	0.0101091	-0.0142747	30666	0.204321	0.859275
PA_Pt_e05	FA_CT30	rh_rostralanteriorcingulate	0.00769866	-0.0149185	30666	0.204321	0.654386
PA_Pt_e05	ISOVF_PT50	rh_superiortemporal	0.122705	-0.00816992	30666	0.204508	1
DYS_Pt_5e05	OD_PT50	lh_cuneus	0.0048158	0.01578	30666	0.204672	0.409343
DYS_Pt_5e05	OD_PT50	lh_pericalcarine	0.00315198	0.0162101	30666	0.204672	0.267918
PA_Pt_0_05	FA_CT30	Left_VentralDC	0.12084	-0.00864273	30666	0.205428	1
NREP_Pt_0_1	FA_PT50	lh_caudalmiddlefrontal	0.0279856	0.0119644	30666	0.205458	1
NREP_Pt_0_1	FA_PT50	lh_superiortemporal	0.0255291	0.0124343	30666	0.205458	1
NREP_Pt_0_1	FA_PT50	rh_fusiform	0.0290059	0.0121074	30666	0.205458	1
SP_Pt_0_5	OD_PT50	lh_caudalanteriorcingulate	0.0024302	0.0170988	30666	0.206567	0.206567
NREAD_Pt_0_1	MD_PT50	lh_lingual	0.00946217	-0.0144426	30666	0.207266	0.804285
NREAD_Pt_0_1	MD_PT50	lh_pericalcarine	0.0097537	-0.0146871	30666	0.207266	0.829064
NREAD_Pt_0_1	MD_PT50	rh_precuneus	0.00851955	-0.0141266	30666	0.207266	0.724162
NREAD_Pt_0_05	ICVF_CT30	Left_Thalamus_Proper	0.0342082	0.0116978	30666	0.207329	1
NREAD_Pt_0_05	ICVF_CT30	Left_Caudate	0.0564426	0.0102101	30666	0.207329	1
NREAD_Pt_0_05	ICVF_CT30	Left_Putamen	0.0274974	0.0121307	30666	0.207329	1
NREAD_Pt_0_05	ICVF_CT30	Brain_Stem	0.032545	0.0120617	30666	0.207329	1
NREAD_Pt_0_05	ICVF_CT30	Left_Accumbens_area	0.0268575	0.0123435	30666	0.207329	1
NREAD_Pt_0_05	ICVF_CT30	Right_Thalamus_Proper	0.0179116	0.0131115	30666	0.207329	1
NREAD_Pt_0_05	ICVF_CT30	Right_Caudate	0.0360294	0.0112627	30666	0.207329	1
NREAD_Pt_0_05	ICVF_CT30	Right_Putamen	0.0155492	0.0133237	30666	0.207329	1
NREAD_Pt_0_05	ICVF_CT30	Right_Pallidum	0.0248092	0.0124959	30666	0.207329	1
NREAD_Pt_0_05	ICVF_CT30	Right_Accumbens_area	0.0302657	0.012153	30666	0.207329	1
NREAD_Pt_0_05	ICVF_CT30	Right_VentralDC	0.0238127	0.0126367	30666	0.207329	1
NREAD_Pt_0_05	ICVF_CT30	lh_caudalmiddlefrontal	0.0476381	0.01075	30666	0.207329	1
NREAD_Pt_0_05	ICVF_CT30	lh_inferiortemporal	0.043055	0.0110894	30666	0.207329	1
NREAD_Pt_0_05	ICVF_CT30	lh_lateralorbitofrontal	0.057036	0.0102334	30666	0.207329	1
NREAD_Pt_0_05	ICVF_CT30	lh_posteriorcingulate	0.0307329	0.011987	30666	0.207329	1
NREAD_Pt_0_05	ICVF_CT30	lh_rostralanteriorcingulate	0.0479956	0.0111264	30666	0.207329	1
NREAD_Pt_0_05	ICVF_CT30	lh_rostralmiddlefrontal	0.0501498	0.010502	30666	0.207329	1
NREAD_Pt_0_05	ICVF_CT30	rh_entorhinal	0.0504643	0.0105629	30666	0.207329	1
NREAD_Pt_0_05	ICVF_CT30	rh_lateralorbitofrontal	0.0228346	0.012423	30666	0.207329	1
NREAD_Pt_0_05	ICVF_CT30	rh_parsorbitalis	0.0595812	0.010207	30666	0.207329	1
NREAD_Pt_0_05	ICVF_CT30	rh_parstriangularis	0.0408755	0.0110888	30666	0.207329	1
NREAD_Pt_0_05	ICVF_CT30	rh_rostralmiddlefrontal	0.022972	0.0123171	30666	0.207329	1
NREAD_Pt_0_05	ICVF_CT30	rh_superiorfrontal	0.0600851	0.0101721	30666	0.207329	1
NREAD_Pt_0_05	ICVF_CT30	rh_supramarginal	0.0609791	0.0104217	30666	0.207329	1
NREAD_Pt_0_05	ICVF_CT30	rh_insula	0.0555767	0.0106927	30666	0.207329	1
DYS_Pt_5e05	ISOVF_CT30	Left_Amygdala	0.00732328	-0.0144192	30666	0.207493	0.622479
DYS_Pt_e05	SC_PT50	rh_insula	0.00732329	-0.0133305	30666	0.207493	0.622479
NREAD_Pt_0_05	MD_PT50	Left_Thalamus_Proper	0.0415026	-0.0101827	30666	0.207513	1
WR_Pt_1e05	FA_CT30	Right_Putamen	0.0980802	-0.00936496	30666	0.208421	1
SP_Pt_0_01	MD_CT30	rh_inferiorparietal	0.0590433	-0.010055	30666	0.209112	1
NREP_Pt_0_1	SC_PT50	rh_precentral	0.0098548	0.0123857	30666	0.209415	0.837658
NREP_Pt_0_1	FA_PT50	Left_Thalamus_Proper	0.0616095	0.010487	30666	0.209472	1
NREP_Pt_0_1	FA_PT50	Brain_Stem	0.0596553	0.0104734	30666	0.209472	1
NREP_Pt_0_1	FA_PT50	Right_Putamen	0.0563808	0.0108417	30666	0.209472	1
NREP_Pt_0_1	FA_PT50	Right_Hippocampus	0.0371783	0.0117901	30666	0.209472	1
NREP_Pt_0_1	FA_PT50	lh_entorhinal	0.0508537	-0.010795	30666	0.209472	1
NREP_Pt_0_1	FA_PT50	lh_middletemporal	0.0438586	0.0107967	30666	0.209472	1
NREP_Pt_0_1	FA_PT50	lh_transversetemporal	0.0440831	0.0113302	30666	0.209472	1
NREP_Pt_0_1	FA_PT50	rh_bankssts	0.0428131	0.0114586	30666	0.209472	1
NREP_Pt_0_1	FA_PT50	rh_caudalmiddlefrontal	0.0605952	0.0104432	30666	0.209472	1
NREP_Pt_0_1	FA_PT50	rh_parstriangularis	0.0523261	0.0109008	30666	0.209472	1
NREP_Pt_0_1	FA_PT50	rh_postcentral	0.0357908	0.0117421	30666	0.209472	1
NREP_Pt_0_1	FA_PT50	rh_superiorparietal	0.0596181	0.0105171	30666	0.209472	1
NREP_Pt_0_1	FA_PT50	rh_transversetemporal	0.0453407	0.0113177	30666	0.209472	1
DYS_Pt_5e08	MD_PT50	lh_pericalcarine	0.0990245	0.00935196	30666	0.210427	1
SP_Pt_0_5	ISOVF_PT50	lh_parsopercularis	0.118919	-0.00800218	30666	0.210586	1
NREAD_Pt_0_1	ISOVF_PT50	Left_Thalamus_Proper	0.124013	-0.00740535	30666	0.211939	1
NREAD_Pt_0_1	ISOVF_PT50	Right_VentralDC	0.12467	-0.00788032	30666	0.211939	1
NREAD_Pt_0_01	OD_PT50	Left_Pallidum	0.0249603	0.0125393	30666	0.212162	1
DYS_Pt_0_01	OD_CT30	Left_Caudate	0.119949	0.00826554	30666	0.21241	1
NREP_Pt_0_5	FA_PT50	lh_insula	0.0425932	0.0113834	30666	0.212966	1
DYS_Pt_e05	FA_PT50	lh_parsorbitalis	0.020102	-0.0127153	30666	0.213584	1
PA_Pt_e05	ISOVF_CT30	lh_lingual	0.108127	-0.00829374	30666	0.213739	1
DYS_Pt_0_1	SC_CT30	lh_entorhinal	0.0843468	-0.00931318	30666	0.214577	1
DYS_Pt_0_1	SC_CT30	lh_lingual	0.0834138	0.00872988	30666	0.214577	1
DYS_Pt_0_1	SC_CT30	lh_parstriangularis	0.0858309	-0.00903804	30666	0.214577	1
NREAD_Pt_0_1	OD_PT50	lh_lateraloccipital	0.0809545	0.00962093	30666	0.215036	1
PA_Pt_0_01	OD_PT50	lh_inferiorparietal	0.00982314	-0.0141368	30666	0.215143	0.834967
PA_Pt_0_01	OD_PT50	rh_postcentral	0.0126555	-0.0133614	30666	0.215143	1
PA_Pt_0_01	OD_PT50	rh_supramarginal	0.0119904	-0.0138143	30666	0.215143	1
PA_Pt_0_5	ISOVF_PT50	lh_medialorbitofrontal	0.00253256	-0.0166086	30666	0.215267	0.215267
SP_Pt_0_5	ISOVF_CT30	lh_lateralorbitofrontal	0.172734	-0.00751502	30666	0.215917	1
SP_Pt_0_5	ISOVF_CT30	lh_rostralmiddlefrontal	0.171804	-0.00714065	30666	0.215917	1
PA_Pt_0_01	SC_CT30	lh_paracentral	0.00254037	0.0161656	30666	0.215932	0.215932
SP_Pt_5e05	OD_CT30	rh_pericalcarine	0.0127029	0.0131794	30666	0.215949	1
SP_Pt_0_01	FA_CT30	lh_superiortemporal	0.127267	0.0085986	30666	0.216353	1
NREP_Pt_1	ICVF_CT30	rh_parsorbitalis	0.125279	0.00831932	30666	0.216385	1
NREP_Pt_1	ICVF_CT30	rh_pericalcarine	0.127285	0.00841932	30666	0.216385	1
NREAD_Pt_0_05	MD_CT30	lh_cuneus	0.178241	-0.00696522	30666	0.216436	1
DYS_Pt_0_05	FA_PT50	Left_Pallidum	0.114609	-0.00880331	30666	0.216484	1
NREP_Pt_1	ICVF_PT50	Right_Thalamus_Proper	0.0509657	0.0108343	30666	0.216604	1
PA_Pt_0_05	FA_CT30	Right_Putamen	0.130181	-0.008563	30666	0.216968	1
PA_Pt_5e05	MD_CT30	rh_parstriangularis	0.122536	-0.00798295	30666	0.216992	1
PA_Pt_0_5	MD_CT30	lh_frontalpole	0.0051246	0.0148703	30666	0.217796	0.435591
PA_Pt_0_5	MD_CT30	rh_caudalanteriorcingulate	0.00295094	0.0154653	30666	0.217796	0.25083
SP_Pt_0_01	MD_CT30	lh_caudalmiddlefrontal	0.0640635	-0.00939585	30666	0.217816	1
NREP_Pt_0_1	FA_PT50	rh_paracentral	0.0666544	0.0100514	30666	0.217908	1
DYS_Pt_0_01	OD_PT50	lh_superiorparietal	0.0205201	0.0125073	30666	0.218026	1
DYS_Pt_e05	OD_CT30	rh_lateraloccipital	0.138544	0.00742894	30666	0.218079	1
DYS_Pt_5e05	FA_PT50	lh_entorhinal	0.0193766	-0.0129158	30666	0.218672	1
DYS_Pt_5e05	FA_PT50	lh_parstriangularis	0.0257261	-0.0124861	30666	0.218672	1
DYS_Pt_5e05	FA_PT50	lh_precentral	0.0118021	-0.0141512	30666	0.218672	1
DYS_Pt_5e05	FA_PT50	lh_superiortemporal	0.0203375	-0.0129072	30666	0.218672	1
DYS_Pt_5e05	FA_PT50	lh_insula	0.0214096	-0.01289	30666	0.218672	1
DYS_Pt_5e05	FA_PT50	rh_parstriangularis	0.0192024	-0.0131437	30666	0.218672	1
DYS_Pt_5e05	FA_PT50	rh_rostralanteriorcingulate	0.0247334	-0.0124844	30666	0.218672	1
PA_Pt_1	MD_CT30	lh_frontalpole	0.00514743	0.0148639	30666	0.218766	0.437531
PA_Pt_1	MD_CT30	rh_caudalanteriorcingulate	0.00361273	0.0151406	30666	0.218766	0.307082
DYS_Pt_5e05	MD_PT50	lh_superiorfrontal	0.0721394	-0.00927757	30666	0.218995	1
NREP_Pt_1	FA_CT30	rh_supramarginal	0.074775	0.0100795	30666	0.219027	1
NREP_Pt_1	FA_CT30	rh_insula	0.0773038	0.0100833	30666	0.219027	1
PA_Pt_5e05	OD_PT50	Left_Putamen	0.0232312	0.0117755	30666	0.219406	1
PA_Pt_5e05	OD_PT50	Left_Pallidum	0.0113946	0.0141501	30666	0.219406	0.968539
PA_Pt_5e05	OD_PT50	Right_Caudate	0.0197249	0.0126348	30666	0.219406	1
PA_Pt_5e05	OD_PT50	rh_bankssts	0.0215063	0.0128015	30666	0.219406	1
PA_Pt_5e05	OD_PT50	rh_entorhinal	0.023081	0.0127364	30666	0.219406	1
PA_Pt_5e05	OD_PT50	rh_parahippocampal	0.0205933	0.0128646	30666	0.219406	1
PA_Pt_1	MD_PT50	Right_Thalamus_Proper	0.0296499	0.0111941	30666	0.219571	1
PA_Pt_1	MD_PT50	lh_fusiform	0.016039	0.0128414	30666	0.219571	1
PA_Pt_1	MD_PT50	rh_bankssts	0.0273292	0.0120268	30666	0.219571	1
PA_Pt_1	MD_PT50	rh_fusiform	0.026151	0.0121195	30666	0.219571	1
PA_Pt_1	MD_PT50	rh_paracentral	0.0309982	0.0115029	30666	0.219571	1
PA_Pt_1	MD_PT50	rh_precentral	0.0296128	0.0116312	30666	0.219571	1
PA_Pt_1	MD_PT50	rh_rostralmiddlefrontal	0.0265028	0.012063	30666	0.219571	1
PA_Pt_5e05	MD_CT30	Right_VentralDC	0.129228	-0.00793503	30666	0.219688	1
NREP_Pt_0_001	MD_PT50	rh_lingual	0.0103402	-0.0143797	30666	0.219729	0.878917
NREP_Pt_0_05	FA_PT50	lh_inferiortemporal	0.0615703	0.0101889	30666	0.219927	1
NREP_Pt_0_05	FA_PT50	rh_transversetemporal	0.0620969	0.0105498	30666	0.219927	1
DYS_Pt_0_5	OD_CT30	lh_inferiorparietal	0.00757377	0.0144532	30666	0.220066	0.643771	Thickness
DYS_Pt_0_5	OD_CT30	lh_parsorbitalis	0.0082661	0.0147426	30666	0.220066	0.702618
DYS_Pt_0_5	OD_CT30	rh_rostralanteriorcingulate	0.0103561	0.0145345	30666	0.220066	0.880265
SP_Pt_0_05	ISOVF_CT30	Left_VentralDC	0.155504	-0.00721732	30666	0.220297	1
SP_Pt_0_1	FA_CT30	Left_VentralDC	0.0292249	0.012171	30666	0.220916	1
SP_Pt_0_1	FA_CT30	rh_inferiortemporal	0.0337161	0.0117602	30666	0.220916	1
SP_Pt_0_1	FA_CT30	rh_lingual	0.0337871	0.0118279	30666	0.220916	1
SP_Pt_0_01	FA_CT30	lh_parsorbitalis	0.132594	0.00804067	30666	0.220991	1
PA_Pt_0_1	ISOVF_PT50	rh_superiortemporal	0.132628	-0.00796058	30666	0.221047	1
DYS_Pt_0_01	MD_PT50	rh_parsopercularis	0.0184306	-0.012426	30666	0.222123	1
DYS_Pt_0_01	MD_PT50	rh_parstriangularis	0.018964	-0.0126485	30666	0.222123	1
DYS_Pt_0_01	MD_PT50	rh_rostralanteriorcingulate	0.0209057	-0.0126896	30666	0.222123	1
DYS_Pt_0_01	MD_PT50	rh_rostralmiddlefrontal	0.0140552	-0.0133622	30666	0.222123	1
DYS_Pt_0_05	FA_CT30	Left_Hippocampus	0.168297	-0.00763854	30666	0.22352	1
SP_Pt_0_1	ISOVF_CT30	lh_pericalcarine	0.105366	-0.00839906	30666	0.223903	1
WR_Pt_0_5	ISOVF_PT50	rh_parahippocampal	0.211137	-0.00701216	30666	0.224334	1
PA_Pt_5e05	ISOVF_PT50	rh_posteriorcingulate	0.0899152	-0.00882619	30666	0.224788	1
WR_Pt_1	OD_CT30	lh_cuneus	0.00265035	-0.0162163	30666	0.225279	0.225279
PA_Pt_0_05	MD_CT30	rh_superiorparietal	0.0424295	0.0107266	30666	0.225407	1
SP_Pt_0_5	ISOVF_PT50	lh_precentral	0.133311	-0.00776355	30666	0.226628	1
PA_Pt_5e05	OD_CT30	Left_Thalamus_Proper	0.0460221	0.0102571	30666	0.226791	1
PA_Pt_5e05	OD_CT30	Left_Putamen	0.0395321	0.0104815	30666	0.226791	1
PA_Pt_5e05	OD_CT30	Brain_Stem	0.0241459	0.0126907	30666	0.226791	1
PA_Pt_5e05	OD_CT30	Right_Thalamus_Proper	0.0517223	0.00993148	30666	0.226791	1
PA_Pt_5e05	OD_CT30	Right_VentralDC	0.0368862	0.0109152	30666	0.226791	1
PA_Pt_5e05	OD_CT30	lh_inferiortemporal	0.0482671	0.0105665	30666	0.226791	1
PA_Pt_5e05	OD_CT30	lh_medialorbitofrontal	0.0479688	0.0106724	30666	0.226791	1
PA_Pt_5e05	OD_CT30	lh_postcentral	0.0266941	0.011691	30666	0.226791	1
PA_Pt_5e05	OD_CT30	lh_frontalpole	0.0533625	0.0109111	30666	0.226791	1
PA_Pt_5e05	OD_CT30	lh_temporalpole	0.031655	0.0117987	30666	0.226791	1
PA_Pt_5e05	OD_CT30	rh_entorhinal	0.0434939	0.0105511	30666	0.226791	1
PA_Pt_5e05	OD_CT30	rh_inferiortemporal	0.0349461	0.0108539	30666	0.226791	1
PA_Pt_5e05	OD_CT30	rh_lateralorbitofrontal	0.029743	0.0118177	30666	0.226791	1
PA_Pt_5e05	OD_CT30	rh_middletemporal	0.0381356	0.0107634	30666	0.226791	1
DYS_Pt_e05	MD_CT30	rh_rostralanteriorcingulate	0.00267055	-0.0158974	30666	0.226997	0.226997
DYS_Pt_0_001	FA_CT30	lh_precentral	0.00536366	-0.0155779	30666	0.227956	0.455911
DYS_Pt_0_001	FA_CT30	rh_rostralanteriorcingulate	0.00467503	-0.015842	30666	0.227956	0.397377
NREP_Pt_0_5	FA_CT30	lh_fusiform	0.0859903	0.00942441	30666	0.228412	1
SP_Pt_0_05	ISOVF_PT50	rh_inferiortemporal	0.161363	-0.00739132	30666	0.228598	1
NREP_Pt_5e05	OD_CT30	lh_paracentral	0.0101755	-0.0139212	30666	0.22892	0.864921
NREP_Pt_5e05	OD_CT30	lh_precentral	0.00783283	-0.0139091	30666	0.22892	0.66579
NREP_Pt_5e05	OD_CT30	lh_superiorparietal	0.0107727	-0.0135332	30666	0.22892	0.915679
NREP_Pt_5e05	OD_CT30	rh_precuneus	0.0100544	-0.0139466	30666	0.22892	0.854626
DYS_Pt_e05	SC_CT30	lh_precentral	0.0107878	-0.011941	30666	0.229242	0.916967
WR_Pt_0_001	ISOVF_CT30	Left_Caudate	0.146661	-0.00723403	30666	0.22927	1
WR_Pt_0_001	ISOVF_CT30	lh_middletemporal	0.148351	-0.00771996	30666	0.22927	1
NREP_Pt_0_5	FA_CT30	lh_transversetemporal	0.0917949	0.00956524	30666	0.229487	1
NREP_Pt_0_5	FA_CT30	lh_insula	0.0906237	0.009531	30666	0.229487	1
DYS_Pt_0_5	FA_PT50	Brain_Stem	0.0216342	-0.0127905	30666	0.229863	1	Volume
DYS_Pt_1	ISOVF_CT30	Right_Caudate	0.0460027	0.0100853	30666	0.230014	1
DYS_Pt_1	ISOVF_CT30	Right_VentralDC	0.0436048	0.0104822	30666	0.230014	1	Volume
DYS_Pt_1	ISOVF_CT30	rh_fusiform	0.0433287	0.0109706	30666	0.230014	1
DYS_Pt_0_5	FA_CT30	Left_Putamen	0.0442198	-0.0114222	30666	0.230035	1
DYS_Pt_0_5	FA_CT30	Right_Thalamus_Proper	0.0400706	-0.0116973	30666	0.230035	1
DYS_Pt_0_5	FA_CT30	Right_Pallidum	0.0446689	-0.0113805	30666	0.230035	1
DYS_Pt_0_5	FA_CT30	lh_caudalmiddlefrontal	0.0460071	-0.0110952	30666	0.230035	1
DYS_Pt_0_5	FA_CT30	lh_parsopercularis	0.0383141	-0.0113156	30666	0.230035	1
DYS_Pt_0_5	FA_CT30	rh_caudalanteriorcingulate	0.0385267	-0.0116203	30666	0.230035	1
DYS_Pt_0_5	FA_CT30	rh_caudalmiddlefrontal	0.0411618	-0.011397	30666	0.230035	1
DYS_Pt_0_5	FA_CT30	rh_lingual	0.0397152	-0.0114744	30666	0.230035	1
DYS_Pt_0_01	FA_PT50	rh_precentral	0.0379272	-0.011785	30666	0.230272	1	Volume, Thickness
PA_Pt_1	ICVF_PT50	rh_precuneus	0.00271218	-0.0165505	30666	0.230535	0.230535
NREP_Pt_0_1	ICVF_PT50	lh_insula	0.0895948	0.0095747	30666	0.230775	1
SP_Pt_1e05	OD_CT30	Right_Putamen	0.0814618	0.00889982	30666	0.230809	1
NREAD_Pt_0_05	OD_CT30	rh_precuneus	0.122704	0.00837014	30666	0.231775	1
WR_Pt_0_001	SC_PT50	rh_parsorbitalis	0.0105691	0.0133562	30666	0.232593	0.898375
WR_Pt_0_001	SC_PT50	rh_superiorfrontal	0.0109455	-0.0111664	30666	0.232593	0.93037
PA_Pt_e05	ISOVF_CT30	lh_precentral	0.133006	-0.00769648	30666	0.234013	1
PA_Pt_e05	ISOVF_CT30	rh_fusiform	0.137655	-0.0080368	30666	0.234013	1
PA_Pt_e05	ISOVF_CT30	rh_inferiortemporal	0.13539	-0.00789226	30666	0.234013	1
DYS_Pt_0_1	SC_PT50	Left_Pallidum	0.0881002	-0.00887881	30666	0.234016	1
DYS_Pt_0_1	SC_PT50	lh_rostralmiddlefrontal	0.0875506	-0.00812656	30666	0.234016	1
DYS_Pt_0_01	FA_PT50	Left_Accumbens_area	0.0414013	-0.0112217	30666	0.234607	1
PA_Pt_5e05	ISOVF_PT50	Left_Putamen	0.110491	-0.00807039	30666	0.234793	1
PA_Pt_5e05	ISOVF_PT50	lh_inferiortemporal	0.107026	-0.0085431	30666	0.234793	1
PA_Pt_5e05	ISOVF_PT50	lh_parsorbitalis	0.108665	-0.0085765	30666	0.234793	1
PA_Pt_5e05	ISOVF_PT50	lh_rostralmiddlefrontal	0.102188	-0.00865365	30666	0.234793	1
PA_Pt_5e05	ISOVF_PT50	rh_parsorbitalis	0.0991889	-0.00877094	30666	0.234793	1
PA_Pt_5e05	ISOVF_PT50	rh_postcentral	0.110389	-0.00835095	30666	0.234793	1
NREP_Pt_1	FA_CT30	lh_fusiform	0.0938331	0.00920008	30666	0.234919	1
NREP_Pt_1	FA_CT30	lh_inferiorparietal	0.0905773	0.00929352	30666	0.234919	1
NREP_Pt_1	FA_CT30	rh_pericalcarine	0.0939675	0.00930553	30666	0.234919	1
NREP_Pt_0_01	MD_PT50	lh_entorhinal	0.0195275	-0.0131352	30666	0.235209	1
NREP_Pt_0_01	MD_PT50	lh_inferiorparietal	0.0170371	-0.0129213	30666	0.235209	1
NREP_Pt_0_01	MD_PT50	lh_lingual	0.0196415	-0.0129593	30666	0.235209	1
NREP_Pt_0_01	MD_PT50	lh_pericalcarine	0.0230081	-0.0128926	30666	0.235209	1
NREP_Pt_0_01	MD_PT50	lh_precuneus	0.0276716	-0.0117508	30666	0.235209	1
NREP_Pt_0_01	MD_PT50	lh_superiorfrontal	0.0168589	-0.0123272	30666	0.235209	1
NREP_Pt_0_01	MD_PT50	rh_lateraloccipital	0.0250209	-0.0120552	30666	0.235209	1
NREP_Pt_0_01	MD_PT50	rh_lingual	0.025853	-0.0125067	30666	0.235209	1
WR_Pt_1e05	MD_CT30	Left_Putamen	0.0395852	0.0104366	30666	0.235411	1
WR_Pt_1e05	MD_CT30	Left_VentralDC	0.0445176	0.0100677	30666	0.235411	1
WR_Pt_1e05	MD_CT30	Right_Thalamus_Proper	0.0457581	0.00993588	30666	0.235411	1
WR_Pt_1e05	MD_CT30	lh_bankssts	0.0470821	0.0106828	30666	0.235411	1
WR_Pt_1e05	MD_CT30	lh_caudalanteriorcingulate	0.0168599	0.0122228	30666	0.235411	1
WR_Pt_1e05	MD_CT30	lh_medialorbitofrontal	0.00903933	0.0139124	30666	0.235411	0.768343
WR_Pt_1e05	MD_CT30	lh_middletemporal	0.0258887	0.0115192	30666	0.235411	1
WR_Pt_1e05	MD_CT30	lh_parsorbitalis	0.0366166	0.0107396	30666	0.235411	1
WR_Pt_1e05	MD_CT30	lh_posteriorcingulate	0.0256328	0.011482	30666	0.235411	1
WR_Pt_1e05	MD_CT30	lh_superiorfrontal	0.0427195	0.00996538	30666	0.235411	1
WR_Pt_1e05	MD_CT30	lh_superiortemporal	0.0162208	0.0124226	30666	0.235411	1
WR_Pt_1e05	MD_CT30	lh_frontalpole	0.0164238	0.0127461	30666	0.235411	1
WR_Pt_1e05	MD_CT30	rh_lingual	0.0328159	0.0110101	30666	0.235411	1
WR_Pt_1e05	MD_CT30	rh_precentral	0.0426145	0.0104074	30666	0.235411	1
WR_Pt_1e05	MD_CT30	rh_precuneus	0.0309251	0.0112914	30666	0.235411	1
WR_Pt_1e05	MD_CT30	rh_rostralanteriorcingulate	0.0157866	0.0127711	30666	0.235411	1
WR_Pt_1e05	MD_CT30	rh_superiorfrontal	0.0431243	0.0100179	30666	0.235411	1
WR_Pt_0_1	ISOVF_PT50	rh_parsopercularis	0.18841	-0.00662053	30666	0.235513	1
NREAD_Pt_0_05	FA_PT50	Right_Caudate	0.0110835	-0.0141473	30666	0.235525	0.9421
NREAD_Pt_0_01	ISOVF_PT50	lh_inferiorparietal	0.0942622	-0.00903368	30666	0.235655	1
PA_Pt_0_01	MD_CT30	lh_caudalanteriorcingulate	0.00556417	0.0141704	30666	0.236477	0.472955
DYS_Pt_e05	MD_CT30	Left_Thalamus_Proper	0.03909	-0.00997141	30666	0.236931	1
DYS_Pt_e05	MD_CT30	Left_Caudate	0.0584178	-0.00920239	30666	0.236931	1
DYS_Pt_e05	MD_CT30	Left_Pallidum	0.020145	-0.0119153	30666	0.236931	1
DYS_Pt_e05	MD_CT30	Left_VentralDC	0.0543875	-0.00964422	30666	0.236931	1
DYS_Pt_e05	MD_CT30	Right_Thalamus_Proper	0.064979	-0.00918328	30666	0.236931	1
DYS_Pt_e05	MD_CT30	Right_Caudate	0.0527262	-0.00971147	30666	0.236931	1
DYS_Pt_e05	MD_CT30	Right_Pallidum	0.0743071	-0.00923368	30666	0.236931	1
DYS_Pt_e05	MD_CT30	Right_VentralDC	0.0758924	-0.00928915	30666	0.236931	1
DYS_Pt_e05	MD_CT30	lh_bankssts	0.0253977	-0.0120322	30666	0.236931	1
DYS_Pt_e05	MD_CT30	lh_entorhinal	0.0502518	-0.0108791	30666	0.236931	1
DYS_Pt_e05	MD_CT30	lh_inferiorparietal	0.0794827	-0.00941377	30666	0.236931	1
DYS_Pt_e05	MD_CT30	lh_isthmuscingulate	0.075605	-0.00908708	30666	0.236931	1
DYS_Pt_e05	MD_CT30	lh_middletemporal	0.0552406	-0.00991659	30666	0.236931	1
DYS_Pt_e05	MD_CT30	lh_parsopercularis	0.0889172	-0.00879239	30666	0.236931	1
DYS_Pt_e05	MD_CT30	lh_parsorbitalis	0.00911163	-0.0134067	30666	0.236931	0.774488
DYS_Pt_e05	MD_CT30	lh_parstriangularis	0.0151532	-0.0123817	30666	0.236931	1
DYS_Pt_e05	MD_CT30	lh_rostralanteriorcingulate	0.0261171	-0.0117374	30666	0.236931	1
DYS_Pt_e05	MD_CT30	lh_rostralmiddlefrontal	0.089108	-0.00881596	30666	0.236931	1
DYS_Pt_e05	MD_CT30	lh_superiorfrontal	0.0891976	-0.00836244	30666	0.236931	1
DYS_Pt_e05	MD_CT30	lh_superiorparietal	0.0611593	-0.00999553	30666	0.236931	1
DYS_Pt_e05	MD_CT30	lh_superiortemporal	0.0166997	-0.0123735	30666	0.236931	1
DYS_Pt_e05	MD_CT30	rh_bankssts	0.078011	-0.00933106	30666	0.236931	1
DYS_Pt_e05	MD_CT30	rh_caudalanteriorcingulate	0.00847322	-0.0137016	30666	0.236931	0.720223
DYS_Pt_e05	MD_CT30	rh_fusiform	0.0372167	-0.0110008	30666	0.236931	1
DYS_Pt_e05	MD_CT30	rh_inferiortemporal	0.054578	-0.0100605	30666	0.236931	1
DYS_Pt_e05	MD_CT30	rh_isthmuscingulate	0.0712012	-0.00931684	30666	0.236931	1
DYS_Pt_e05	MD_CT30	rh_middletemporal	0.0557879	-0.00997756	30666	0.236931	1
DYS_Pt_e05	MD_CT30	rh_parsopercularis	0.0400935	-0.0107473	30666	0.236931	1
DYS_Pt_e05	MD_CT30	rh_precuneus	0.0175308	-0.0124346	30666	0.236931	1
DYS_Pt_e05	MD_CT30	rh_superiorparietal	0.0659729	-0.00972876	30666	0.236931	1
DYS_Pt_e05	MD_CT30	rh_supramarginal	0.0824599	-0.0092016	30666	0.236931	1
NREAD_Pt_0_5	ISOVF_CT30	rh_rostralanteriorcingulate	0.190472	-0.00709496	30666	0.23809	1
NREAD_Pt_1	ISOVF_CT30	rh_rostralanteriorcingulate	0.19074	-0.00709107	30666	0.238425	1
PA_Pt_5e05	ISOVF_CT30	lh_bankssts	0.140693	-0.00791569	30666	0.239178	1
SP_Pt_1	ISOVF_PT50	lh_parsopercularis	0.111082	-0.00817831	30666	0.239838	1
SP_Pt_1	ISOVF_PT50	lh_superiortemporal	0.112865	-0.00852654	30666	0.239838	1
PA_Pt_1	FA_CT30	lh_superiorfrontal	0.0451665	-0.0108867	30666	0.239947	1
PA_Pt_0_1	ICVF_PT50	rh_precentral	0.113634	-0.00891978	30666	0.241472	1
DYS_Pt_0_5	OD_CT30	rh_lingual	0.0142179	0.0128162	30666	0.241704	1
NREP_Pt_1	ICVF_PT50	Left_Pallidum	0.0597416	0.0107002	30666	0.241811	1
WR_Pt_0_001	ISOVF_PT50	Right_Amygdala	0.0674245	-0.0100871	30666	0.241886	1
WR_Pt_0_001	ISOVF_PT50	lh_caudalanteriorcingulate	0.0690779	-0.00944222	30666	0.241886	1
WR_Pt_0_001	ISOVF_PT50	lh_inferiorparietal	0.0644285	-0.00998115	30666	0.241886	1
WR_Pt_0_001	ISOVF_PT50	lh_superiortemporal	0.0628007	-0.00998477	30666	0.241886	1
WR_Pt_0_001	ISOVF_PT50	lh_insula	0.071143	-0.00947515	30666	0.241886	1
WR_Pt_0_001	ISOVF_PT50	rh_precentral	0.0593301	-0.00960179	30666	0.241886	1
DYS_Pt_1	OD_CT30	Left_VentralDC	0.0250193	0.011461	30666	0.242209	1	Volume
DYS_Pt_1	OD_CT30	rh_medialorbitofrontal	0.0223153	0.0126255	30666	0.242209	1
DYS_Pt_1	OD_CT30	rh_parsopercularis	0.0284952	0.0120872	30666	0.242209	1
DYS_Pt_1	OD_CT30	rh_parsorbitalis	0.0268105	0.0123286	30666	0.242209	1
DYS_Pt_1	OD_CT30	rh_posteriorcingulate	0.0216129	0.0128718	30666	0.242209	1
NREP_Pt_0_1	FA_PT50	lh_postcentral	0.0769554	0.00992845	30666	0.242267	1
NREP_Pt_0_001	ICVF_CT30	Right_Amygdala	0.00285877	0.0162764	30666	0.242995	0.242995
PA_Pt_0_1	FA_CT30	Left_Hippocampus	0.143109	-0.00809765	30666	0.243285	1
PA_Pt_0_1	FA_CT30	rh_lateralorbitofrontal	0.142977	-0.00815333	30666	0.243285	1
PA_Pt_0_1	FA_CT30	rh_superiorparietal	0.139859	-0.00830539	30666	0.243285	1
WR_Pt_5e05	MD_PT50	lh_precuneus	0.00451135	0.0151518	30666	0.243554	0.383464
WR_Pt_5e05	MD_PT50	rh_parsorbitalis	0.00573069	0.0148954	30666	0.243554	0.487109
DYS_Pt_0_1	SC_PT50	lh_transversetemporal	0.0977771	-0.00891189	30666	0.244443	1
SP_Pt_1	ISOVF_CT30	Left_Thalamus_Proper	0.179662	-0.00643423	30666	0.245208	1
SP_Pt_1	ISOVF_CT30	Left_Caudate	0.18752	-0.00658292	30666	0.245208	1
SP_Pt_1	ISOVF_CT30	Left_Putamen	0.195125	-0.00666747	30666	0.245208	1
SP_Pt_1	ISOVF_CT30	lh_bankssts	0.195676	-0.00696706	30666	0.245208	1
SP_Pt_1	ISOVF_CT30	lh_precentral	0.196166	-0.0066383	30666	0.245208	1
SP_Pt_1	ISOVF_CT30	lh_superiorfrontal	0.182597	-0.00651527	30666	0.245208	1
SP_Pt_1	ISOVF_CT30	rh_caudalmiddlefrontal	0.191926	-0.00643833	30666	0.245208	1
DYS_Pt_5e05	OD_PT50	Left_Putamen	0.00869026	0.0136197	30666	0.246224	0.738672
DYS_Pt_0_5	FA_CT30	lh_middletemporal	0.0699641	-0.0100791	30666	0.247789	1
DYS_Pt_0_5	FA_CT30	lh_superiortemporal	0.0667348	-0.0103674	30666	0.247789	1
DYS_Pt_0_5	FA_CT30	rh_inferiorparietal	0.0614238	-0.0103062	30666	0.247789	1
DYS_Pt_0_5	FA_CT30	rh_inferiortemporal	0.0686325	-0.0100963	30666	0.247789	1
DYS_Pt_0_5	FA_CT30	rh_pericalcarine	0.0615839	-0.0103846	30666	0.247789	1
DYS_Pt_0_5	FA_CT30	rh_superiorparietal	0.0547402	-0.0108387	30666	0.247789	1
DYS_Pt_0_5	FA_CT30	rh_temporalpole	0.0662994	0.010178	30666	0.247789	1
PA_Pt_0_1	ISOVF_PT50	rh_fusiform	0.160448	-0.0075407	30666	0.247964	1
PA_Pt_e05	FA_PT50	Brain_Stem	0.0233547	-0.0125895	30666	0.248143	1
PA_Pt_e05	FA_PT50	Right_Putamen	0.0218071	-0.0130114	30666	0.248143	1
SP_Pt_0_01	MD_PT50	Right_Caudate	0.00584396	-0.0154415	30666	0.248368	0.496737
SP_Pt_0_01	MD_PT50	lh_lateraloccipital	0.00580146	-0.0145201	30666	0.248368	0.493124
NREAD_Pt_1	OD_PT50	lh_middletemporal	0.0233782	0.0122731	30666	0.248394	1
NREP_Pt_0_1	ICVF_PT50	lh_paracentral	0.0993602	0.00902152	30666	0.248401	1
NREAD_Pt_5e05	OD_PT50	Right_Thalamus_Proper	0.116954	0.00806409	30666	0.248528	1
SP_Pt_1e05	OD_CT30	Left_Putamen	0.14796	0.00736215	30666	0.248664	1
SP_Pt_1e05	OD_CT30	rh_superiortemporal	0.149199	0.00757051	30666	0.248664	1
PA_Pt_0_5	FA_CT30	lh_insula	0.0735527	-0.010056	30666	0.250079	1
DYS_Pt_0_001	SC_CT30	Left_Amygdala	0.0235478	-0.0121384	30666	0.250195	1
PA_Pt_0_05	ISOVF_CT30	Right_Accumbens_area	0.236491	-0.00657636	30666	0.251272	1
SP_Pt_0_5	MD_PT50	Right_Caudate	0.00295894	-0.0166838	30666	0.25151	0.25151
DYS_Pt_0_5	FA_CT30	rh_isthmuscingulate	0.0740337	-0.0101837	30666	0.251714	1
DYS_Pt_0_05	MD_PT50	lh_pericalcarine	0.00768781	0.0151471	30666	0.252718	0.653464
DYS_Pt_0_05	MD_PT50	lh_transversetemporal	0.00891947	-0.0147464	30666	0.252718	0.758155
DYS_Pt_0_05	MD_PT50	rh_transversetemporal	0.00620242	-0.0154633	30666	0.252718	0.527206	Volume
NREP_Pt_0_1	ISOVF_CT30	Right_Accumbens_area	0.00297811	-0.0165254	30666	0.25314	0.25314
DYS_Pt_0_05	FA_PT50	Left_Thalamus_Proper	0.148953	-0.00810641	30666	0.25322	1
DYS_Pt_0_05	FA_PT50	rh_lateralorbitofrontal	0.148158	-0.00812273	30666	0.25322	1
PA_Pt_5e05	MD_CT30	lh_caudalmiddlefrontal	0.173867	-0.00690166	30666	0.25333	1
PA_Pt_5e05	MD_CT30	lh_parsorbitalis	0.177696	-0.00692563	30666	0.25333	1
PA_Pt_5e05	MD_CT30	rh_postcentral	0.178821	-0.00708576	30666	0.25333	1
PA_Pt_0_05	ICVF_PT50	lh_paracentral	0.20316	-0.0069552	30666	0.25395	1
WR_Pt_1e05	MD_CT30	Left_Caudate	0.115649	0.00764644	30666	0.254026	1
WR_Pt_1e05	MD_CT30	Left_Pallidum	0.0716318	0.00923331	30666	0.254026	1
WR_Pt_1e05	MD_CT30	Left_Accumbens_area	0.0751319	-0.010037	30666	0.254026	1
WR_Pt_1e05	MD_CT30	Right_Caudate	0.105191	0.00811858	30666	0.254026	1
WR_Pt_1e05	MD_CT30	Right_Putamen	0.087285	0.00868484	30666	0.254026	1
WR_Pt_1e05	MD_CT30	lh_fusiform	0.114309	0.00803492	30666	0.254026	1
WR_Pt_1e05	MD_CT30	lh_inferiorparietal	0.0848628	0.00924529	30666	0.254026	1
WR_Pt_1e05	MD_CT30	lh_inferiortemporal	0.0695487	0.00943226	30666	0.254026	1
WR_Pt_1e05	MD_CT30	lh_lateraloccipital	0.0805804	0.00895523	30666	0.254026	1
WR_Pt_1e05	MD_CT30	lh_postcentral	0.11917	0.00829303	30666	0.254026	1
WR_Pt_1e05	MD_CT30	lh_precentral	0.0580307	0.00975957	30666	0.254026	1
WR_Pt_1e05	MD_CT30	lh_precuneus	0.101706	0.00861796	30666	0.254026	1
WR_Pt_1e05	MD_CT30	lh_superiorparietal	0.119541	0.00830652	30666	0.254026	1
WR_Pt_1e05	MD_CT30	lh_supramarginal	0.0958933	0.00892015	30666	0.254026	1
WR_Pt_1e05	MD_CT30	rh_caudalanteriorcingulate	0.0960679	0.00865766	30666	0.254026	1
WR_Pt_1e05	MD_CT30	rh_inferiortemporal	0.0890414	0.00889565	30666	0.254026	1
WR_Pt_1e05	MD_CT30	rh_isthmuscingulate	0.0885604	0.00879026	30666	0.254026	1
WR_Pt_1e05	MD_CT30	rh_medialorbitofrontal	0.0970385	0.00874372	30666	0.254026	1
WR_Pt_1e05	MD_CT30	rh_middletemporal	0.0609757	0.0097693	30666	0.254026	1
WR_Pt_1e05	MD_CT30	rh_pericalcarine	0.101706	0.00863059	30666	0.254026	1
WR_Pt_1e05	MD_CT30	rh_posteriorcingulate	0.0819934	0.00941588	30666	0.254026	1
WR_Pt_1e05	MD_CT30	rh_rostralmiddlefrontal	0.119268	0.00790799	30666	0.254026	1
WR_Pt_1e05	MD_CT30	rh_superiorparietal	0.0949085	0.00883264	30666	0.254026	1
DYS_Pt_0_5	ISOVF_CT30	lh_parsorbitalis	0.0897558	0.00913494	30666	0.254308	1
NREAD_Pt_e05	MD_PT50	lh_cuneus	0.00452133	-0.0158886	30666	0.255073	0.384313
NREAD_Pt_e05	MD_PT50	lh_insula	0.00600172	-0.0148237	30666	0.255073	0.510146
PA_Pt_0_1	ISOVF_PT50	lh_posteriorcingulate	0.16838	-0.00708701	30666	0.255578	1
[truncated: 47,984 more rows]

## Sheet: Supplementary table 3
Supplementary table 3
Regression results of the left insula including educational attainment, income, and fluid intelligence as a covariate in the UK Biobank dataset
Note. This table presents the associations between PGI for dyslexia and grey and white matter measures of the left insula, with educational attainment, income, and fluid intelligence in UK Biobank dataset included as additional covariates. Only significant results are shown. GM: grey matter; WM: white matter.
Polygenic score	Modality	Measure	p_value	beta_std	sample_size
DYS_Pt_5e08	WM	OD_CT30	0.0125564	0.019017	15193
DYS_Pt_5e08	GM	Area	0.0128729	-0.0170965	16385
DYS_Pt_e05	WM	FA_CT30	0.0282324	-0.0176011	15193
DYS_Pt_e05	WM	SC_CT30	0.0133794	-0.019698	15193
DYS_Pt_e05	WM	OD_CT30	0.000847136	0.0254564	15193
DYS_Pt_e05	WM	SC_PT50	0.0139178	-0.0196086	15193
DYS_Pt_5e05	WM	OD_CT30	0.00437362	0.0217496	15193
DYS_Pt_0.5	WM	ISOVF_CT30	0.0469914	0.0149671	15193
DYS_Pt_0.5	WM	MD_PT50	0.031289	0.0166617	15193
DYS_Pt_1	WM	MD_PT50	0.0299257	0.0168007	15193
NREAD_Pt_e05	WM	FA_PT50	0.0176862	-0.0188981	15193
NREAD_Pt_e05	WM	ICVF_PT50	0.0196897	-0.0186667	15193
NREAD_Pt_5e05	WM	FA_CT30	0.00973403	-0.0206878	15193
NREAD_Pt_0.01	WM	MD_CT30	0.041404	-0.0150065	15193
NREAD_Pt_0.01	WM	ICVF_CT30	0.0460483	0.0156074	15193
NREAD_Pt_0.01	WM	FA_PT50	0.0350456	0.0168295	15193
NREAD_Pt_0.01	WM	ICVF_PT50	0.00820219	0.0212049	15193
NREAD_Pt_0.01	WM	OD_PT50	0.0264971	0.0174822	15193
NREAD_Pt_0.05	WM	MD_CT30	0.00403293	-0.0211794	15193
NREAD_Pt_0.05	WM	ICVF_CT30	0.0218553	0.0179566	15193
NREAD_Pt_0.05	WM	ICVF_PT50	0.0276037	0.0176886	15193
NREAD_Pt_0.1	WM	MD_CT30	0.0179158	-0.017469	15193
NREAD_Pt_0.1	WM	ICVF_PT50	0.0395999	0.016555	15193
NREAD_Pt_0.5	WM	MD_CT30	0.0281508	-0.0162148	15193
NREAD_Pt_0.5	WM	ICVF_CT30	0.0401031	0.0161214	15193
NREAD_Pt_0.5	WM	ICVF_PT50	0.0126971	0.0200677	15193
NREAD_Pt_1	WM	MD_CT30	0.0368167	-0.0154194	15193
NREAD_Pt_1	WM	ICVF_PT50	0.0159824	0.019398	15193
NREP_Pt_0.001	WM	OD_PT50	0.0239093	0.0177647	15193
NREP_Pt_0.01	WM	OD_PT50	0.0123886	0.0196952	15193
NREP_Pt_0.05	WM	MD_PT50	0.0437728	0.0155356	15193
NREP_Pt_0.05	WM	ICVF_PT50	0.0391974	0.016548	15193
NREP_Pt_0.05	WM	OD_PT50	0.00475661	0.0222509	15193
NREP_Pt_0.1	WM	OD_PT50	0.00797364	0.0209042	15193
NREP_Pt_0.5	WM	ICVF_PT50	0.0165382	0.0192468	15193
NREP_Pt_0.5	WM	OD_PT50	0.00231025	0.0240331	15193
NREP_Pt_1	WM	ICVF_PT50	0.0111031	0.0203984	15193
NREP_Pt_1	WM	OD_PT50	0.00388029	0.0227835	15193
PA_Pt_e05	WM	MD_CT30	0.00383126	-0.0212313	15193
PA_Pt_e05	WM	ISOVF_CT30	0.0275145	-0.0164965	15193
PA_Pt_5e05	WM	ISOVF_CT30	0.0451361	-0.0150138	15193
PA_Pt_0.001	WM	SC_CT30	0.0251853	-0.0177954	15193
PA_Pt_0.001	WM	SC_PT50	0.0251448	-0.0178213	15193
PA_Pt_0.01	WM	SC_CT30	0.0327243	-0.0169763	15193
PA_Pt_0.01	WM	ISOVF_CT30	0.00668528	-0.0203127	15193
PA_Pt_0.01	WM	SC_PT50	0.0442507	-0.0160116	15193
PA_Pt_0.01	WM	ISOVF_PT50	0.033145	-0.015934	15193
PA_Pt_0.05	WM	ISOVF_CT30	0.029319	-0.0163379	15193
PA_Pt_0.1	WM	SC_PT50	0.0483955	-0.015721	15193
SP_Pt_5e05	WM	OD_CT30	0.012648	0.0189755	15193
SP_Pt_5e05	WM	OD_PT50	0.0459205	0.0156937	15193
SP_Pt_0.01	GM	Area	0.0323906	0.0147051	16385
SP_Pt_0.01	GM	Thickness	0.0224724	-0.0175579	16388
SP_Pt_0.05	GM	Area	0.0251357	0.0154025	16385
WR_Pt_1e05	WM	ICVF_CT30	0.0174828	-0.0185704	15193
WR_Pt_0.001	WM	SC_CT30	0.0421654	0.0161534	15193
WR_Pt_0.001	WM	ISOVF_CT30	0.0307718	-0.0161787	15193
WR_Pt_0.01	WM	ISOVF_CT30	0.0183239	-0.0177302	15193
WR_Pt_0.01	WM	ISOVF_PT50	0.0115447	-0.0189571	15193
WR_Pt_0.05	WM	OD_PT50	0.00575024	0.0218257	15193
WR_Pt_0.05	GM	Area	0.0165967	0.016528	16385
WR_Pt_0.05	GM	Volume	0.0471291	0.0135995	16387
WR_Pt_0.1	WM	OD_PT50	0.0129348	0.0196914	15193
WR_Pt_0.1	GM	Area	0.0340381	0.0146577	16385
WR_Pt_0.1	GM	Volume	0.0478171	0.013588	16387
WR_Pt_0.5	WM	ISOVF_PT50	0.0404018	-0.0154609	15193
WR_Pt_1	WM	ISOVF_PT50	0.0178309	-0.0178733	15193

## Sheet: Supplementary table 4
Supplementary table 4
Cross-dataset validation of association between PGI and grey matter structure in the Generation Scotland cohort.
Note. This table presents the associations between PGI for dyslexia and regional grey matter structure in Generation Scotland. Analyses were conducted separately for cortical area, thickness, and volume using FreeSurfer-derived ROIs. All models were adjusted for age, sex, and the first 10 genetic principal components. Only connectivity with significant association were shown.
Polygenic score	Measure	ROIs	p_value	beta_std	sample_size
PA_Pt_0.1	Thickness	lh_pericalcarine	0.000122112	0.127709	881
DYS_Pt_0.1	Area	lh_rostralmiddlefrontal	0.000126078	-0.114972	882
DYS_Pt_0.1	Thickness	rh_medialorbitofrontal	0.000153984	0.126413	882
DYS_Pt_0.1	Area	lh_fusiform	0.000155392	-0.113641	882
DYS_Pt_5e08	Area	lh_insula	0.000175026	-0.114369	882
PA_Pt_0.05	Thickness	lh_pericalcarine	0.000191227	0.123506	881
DYS_Pt_0.05	Area	lh_fusiform	0.000208261	-0.111343	882
DYS_Pt_0.05	Thickness	rh_medialorbitofrontal	0.00021347	0.123576	882
DYS_Pt_1e05	Volume	rh_isthmuscingulate	0.000224453	-0.116178	881
DYS_Pt_0.5	Area	rh_insula	0.000243688	-0.11099	881
DYS_Pt_0.1	Area	rh_insula	0.000285385	-0.110027	881
DYS_Pt_1	Area	lh_fusiform	0.000296623	-0.108472	882
DYS_Pt_0.05	Area	rh_insula	0.000298857	-0.109563	881
DYS_Pt_1	Area	rh_fusiform	0.000302397	-0.106927	882
DYS_Pt_0.1	Area	rh_fusiform	0.000305062	-0.107134	882
DYS_Pt_0.5	Area	lh_fusiform	0.000334606	-0.107566	882
DYS_Pt_0.5	Area	rh_fusiform	0.000339178	-0.106076	882
WR_Pt_0.5	Area	rh_middletemporal	0.000341488	0.108553	882
DYS_Pt_0.05	Area	lh_rostralmiddlefrontal	0.000350948	-0.107145	882
DYS_Pt_0.05	Area	rh_fusiform	0.000367354	-0.105605	882
DYS_Pt_1	Area	rh_insula	0.000378214	-0.107541	881
DYS_Pt_5e08	Area	lh_superiortemporal	0.00039482	-0.106875	882
DYS_Pt_1e05	Area	rh_isthmuscingulate	0.00042397	-0.110332	882
DYS_Pt_1e05	Volume	lh_insula	0.000472139	-0.106012	882
DYS_Pt_5e08	Area	rh_parahippocampal	0.000483098	-0.109244	881
DYS_Pt_0.01	Area	lh_superiortemporal	0.000487511	-0.105142	882
DYS_Pt_0.5	Area	lh_superiortemporal	0.000513993	-0.104333	882
WR_Pt_1	Area	rh_middletemporal	0.000533054	0.104941	882
NREAD_Pt_0.05	Area	rh_paracentral	0.0005599	0.109898	881
DYS_Pt_0.5	Area	rh_middletemporal	0.000569323	-0.103693	882
DYS_Pt_5e05	Area	rh_isthmuscingulate	0.000570283	-0.107968	882
DYS_Pt_1	Area	lh_superiortemporal	0.000616973	-0.102837	882
DYS_Pt_1	Thickness	rh_medialorbitofrontal	0.000640386	0.113828	882
DYS_Pt_1	Area	rh_middletemporal	0.000641317	-0.102702	882
DYS_Pt_0.01	Area	rh_insula	0.000708648	-0.102872	881
DYS_Pt_0.1	Area	rh_frontalpole	0.000728042	-0.111136	882
WR_Pt_0.5	Area	rh_superiortemporal	0.000738392	0.10684	882
DYS_Pt_1e05	Area	lh_superiortemporal	0.00074263	-0.101311	882
WR_Pt_1	Area	rh_superiortemporal	0.000804271	0.106038	882
PA_Pt_5e05	Volume	lh_postcentral	0.000816236	0.109818	882
WR_Pt_1	Area	lh_superiortemporal	0.000823027	0.101193	882
DYS_Pt_0.5	Volume	rh_postcentral	0.000855385	-0.108208	882
DYS_Pt_1	Volume	rh_postcentral	0.000866987	-0.108061	882
DYS_Pt_0.01	Area	rh_superiorfrontal	0.00087926	-0.100579	882
NREAD_Pt_0.01	Thickness	rh_rostralmiddlefrontal	0.000962073	-0.112056	881
DYS_Pt_5e05	Volume	rh_isthmuscingulate	0.000980578	-0.103974	881
WR_Pt_0.5	Area	lh_superiortemporal	0.00106026	0.0991172	882
DYS_Pt_0.1	Area	rh_superiortemporal	0.00107479	-0.103017	882
DYS_Pt_0.01	Area	rh_isthmuscingulate	0.00116738	-0.102098	882
PA_Pt_1	Thickness	lh_pericalcarine	0.00117492	0.108185	881
DYS_Pt_0.5	Thickness	rh_medialorbitofrontal	0.00117532	0.108251	882
DYS_Pt_1e05	Area	lh_rostralmiddlefrontal	0.00118336	-0.0971008	882
DYS_Pt_0.1	Area	lh_medialorbitofrontal	0.0012021	-0.101561	881
PA_Pt_0.5	Thickness	lh_pericalcarine	0.00122546	0.107777	881
DYS_Pt_0.05	Area	rh_middletemporal	0.00124486	-0.0973226	882
DYS_Pt_5e05	Area	lh_rostralmiddlefrontal	0.00125377	-0.0967013	882
WR_Pt_0.1	Area	rh_middletemporal	0.00133902	0.0970179	882
DYS_Pt_0.01	Area	lh_fusiform	0.00134137	-0.0965984	882
DYS_Pt_0.05	Area	rh_superiortemporal	0.00144815	-0.10025	882
DYS_Pt_0.1	Volume	rh_middletemporal	0.00145292	-0.0957766	882
WR_Pt_0.5	Area	lh_parsopercularis	0.00145786	0.104148	879
DYS_Pt_5e05	Area	lh_superiortemporal	0.00147149	-0.0956375	882
DYS_Pt_0.1	Area	lh_lingual	0.00149659	-0.09855	881
DYS_Pt_5e08	Area	rh_fusiform	0.00154755	-0.0941808	882
WR_Pt_0.01	Area	lh_postcentral	0.00158028	0.0986411	881
DYS_Pt_1	Area	rh_postcentral	0.00165716	-0.0980842	880
DYS_Pt_0.01	Area	lh_insula	0.00167654	-0.0958325	882
DYS_Pt_0.1	Volume	rh_postcentral	0.00172605	-0.101975	882
DYS_Pt_0.05	Area	rh_superiorfrontal	0.00174178	-0.0944833	882
DYS_Pt_0.1	Area	lh_posteriorcingulate	0.00175506	-0.100438	880
DYS_Pt_5e05	Volume	lh_insula	0.00180801	-0.0947679	882
DYS_Pt_0.5	Area	rh_rostralmiddlefrontal	0.00181139	-0.0931662	882
DYS_Pt_1	Area	rh_rostralmiddlefrontal	0.00181737	-0.0931145	882
DYS_Pt_0.01	Area	lh_posteriorcingulate	0.00186219	-0.100013	880
DYS_Pt_0.01	Area	rh_fusiform	0.00186599	-0.0925087	882
DYS_Pt_5e08	Area	rh_medialorbitofrontal	0.00186911	-0.0976287	882
WR_Pt_1	Area	lh_parsopercularis	0.00187153	0.101707	879
WR_Pt_0.05	Area	lh_parsopercularis	0.00188225	0.101625	879
NREP_Pt_0.001	Area	rh_superiorparietal	0.00188922	0.0956859	882
WR_Pt_0.05	Area	rh_medialorbitofrontal	0.00193881	0.0975068	882
WR_Pt_0.01	Thickness	lh_middletemporal	0.00195689	-0.101975	882
PA_Pt_5e05	Area	rh_superiorparietal	0.00197935	0.0961118	882
DYS_Pt_1	Volume	lh_fusiform	0.00200405	-0.0927015	882
PA_Pt_5e05	Area	lh_postcentral	0.00200923	0.0970443	881
DYS_Pt_0.5	Area	rh_postcentral	0.00202688	-0.0962624	880
WR_Pt_0.001	Area	rh_superiortemporal	0.00206138	0.0968034	882
DYS_Pt_1	Area	lh_lingual	0.00207435	-0.0953411	881
DYS_Pt_0.5	Area	lh_medialorbitofrontal	0.00214268	-0.0960639	881
DYS_Pt_1	Area	lh_medialorbitofrontal	0.00215324	-0.0959989	881
WR_Pt_0.05	Thickness	lh_middletemporal	0.00216645	-0.101495	882
WR_Pt_0.1	Area	rh_superiortemporal	0.00218842	0.0967679	882
DYS_Pt_0.01	Area	rh_middletemporal	0.00222974	-0.0924222	882
WR_Pt_0.1	Thickness	lh_middletemporal	0.00226197	-0.100893	882
DYS_Pt_0.05	Area	lh_insula	0.00227614	-0.0928675	882
DYS_Pt_0.5	Volume	lh_fusiform	0.00230648	-0.0914708	882
WR_Pt_5e05	Thickness	rh_paracentral	0.00231155	-0.0989519	882
NREP_Pt_0.05	Thickness	lh_pericalcarine	0.00233209	0.101361	881
DYS_Pt_5e05	Area	rh_insula	0.00236295	-0.0921491	881
WR_Pt_0.5	Thickness	rh_superiorparietal	0.00238163	-0.0989526	882
WR_Pt_0.01	Area	rh_medialorbitofrontal	0.00240079	0.0950261	882
DYS_Pt_0.1	Area	rh_isthmuscingulate	0.00241094	-0.0953247	882
WR_Pt_1	Thickness	lh_middletemporal	0.00242012	-0.100443	882
DYS_Pt_1e05	Area	rh_rostralmiddlefrontal	0.00243718	-0.0905035	882
DYS_Pt_0.5	Area	lh_postcentral	0.00244019	-0.0944903	881
DYS_Pt_0.5	Area	lh_lingual	0.00247779	-0.0937203	881
DYS_Pt_0.1	Area	rh_postcentral	0.00250052	-0.0945412	880
DYS_Pt_1	Area	lh_postcentral	0.00253474	-0.0941148	881
NREP_Pt_0.1	Area	rh_precentral	0.00256038	-0.0918961	882
DYS_Pt_0.05	Thickness	lh_lateralorbitofrontal	0.0025619	0.100223	882
DYS_Pt_0.1	Area	lh_postcentral	0.00257214	-0.0942273	881
NREAD_Pt_0.5	Area	lh_superiortemporal	0.00257421	0.0908482	882
DYS_Pt_0.01	Area	lh_rostralmiddlefrontal	0.00261648	-0.090518	882
DYS_Pt_0.1	Area	lh_pericalcarine	0.00266838	-0.0958658	881
WR_Pt_1	Thickness	rh_superiorparietal	0.00270588	-0.0976445	882
DYS_Pt_0.5	Volume	lh_postcentral	0.00274872	-0.0975672	882
WR_Pt_0.5	Thickness	lh_middletemporal	0.00285068	-0.0988598	882
WR_Pt_1	Area	rh_inferiortemporal	0.00294156	0.0906469	881
WR_Pt_0.1	Area	lh_parsopercularis	0.00296181	0.0970162	879
WR_Pt_0.5	Thickness	rh_inferiorparietal	0.00296863	-0.0960422	882
DYS_Pt_0.1	Volume	rh_superiortemporal	0.00297168	-0.091747	882
DYS_Pt_0.01	Volume	rh_postcentral	0.002992	-0.0967601	882
WR_Pt_0.1	Area	lh_superiortemporal	0.00300853	0.0896214	882
WR_Pt_1	Thickness	rh_inferiorparietal	0.00302275	-0.0958097	882
DYS_Pt_0.1	Volume	lh_fusiform	0.00308886	-0.0890223	882
DYS_Pt_5e05	Area	rh_medialorbitofrontal	0.00312315	-0.0924539	882
DYS_Pt_0.01	Area	lh_medialorbitofrontal	0.00315867	-0.0927189	881
NREAD_Pt_1	Thickness	rh_rostralmiddlefrontal	0.00318142	-0.0995105	881
WR_Pt_0.05	Area	rh_middletemporal	0.003221	0.0893008	882
DYS_Pt_0.01	Volume	rh_isthmuscingulate	0.00323893	-0.09323	881
WR_Pt_0.01	Area	lh_posteriorcingulate	0.0032635	0.0943421	880
WR_Pt_1	Area	lh_middletemporal	0.0033078	0.0901733	880
DYS_Pt_0.5	Volume	rh_middletemporal	0.00331584	-0.0881779	882
DYS_Pt_0.05	Area	lh_medialorbitofrontal	0.00332176	-0.0920408	881
DYS_Pt_1	Volume	lh_postcentral	0.00333537	-0.0956143	882
WR_Pt_0.05	Area	lh_posteriorcingulate	0.00335596	0.0945461	880
DYS_Pt_0.1	Area	rh_superiorfrontal	0.00337497	-0.0885724	882
DYS_Pt_5e05	Area	rh_parstriangularis	0.00346389	-0.0940469	882
DYS_Pt_0.01	Thickness	rh_medialorbitofrontal	0.00351219	0.0977954	882
DYS_Pt_5e05	Area	rh_superiorfrontal	0.00357605	-0.0878776	882
NREAD_Pt_0.5	Thickness	rh_rostralmiddlefrontal	0.00358165	-0.0982047	881
NREAD_Pt_1	Area	lh_superiortemporal	0.00359362	0.0878297	882
DYS_Pt_0.1	Area	rh_inferiortemporal	0.00362082	-0.0883416	881
DYS_Pt_0.001	Area	rh_isthmuscingulate	0.00362814	-0.0915935	882
DYS_Pt_0.05	Area	lh_posteriorcingulate	0.00370665	-0.0931002	880
WR_Pt_0.5	Area	rh_inferiortemporal	0.00379316	0.0882997	881
NREAD_Pt_0.001	Volume	rh_paracentral	0.0037937	0.0944685	881
DYS_Pt_0.1	Area	lh_insula	0.00388535	-0.0879767	882
WR_Pt_0.5	Thickness	rh_precuneus	0.00391308	-0.0922554	882
WR_Pt_0.5	Area	lh_insula	0.00393727	0.0883002	882
DYS_Pt_0.05	Thickness	lh_medialorbitofrontal	0.00403931	0.096515	881
WR_Pt_0.01	Area	rh_postcentral	0.004066	0.0897934	880
NREAD_Pt_0.1	Area	lh_superiortemporal	0.00414263	0.0863587	882
DYS_Pt_0.01	Area	lh_superiorfrontal	0.00424683	-0.0844229	881
WR_Pt_0.001	Area	rh_insula	0.00426562	0.0865167	881
DYS_Pt_1e05	Volume	rh_parahippocampal	0.00426726	-0.0898957	881
WR_Pt_0.5	Area	lh_middletemporal	0.0043187	0.0876671	880
DYS_Pt_1	Area	lh_parsopercularis	0.00436749	-0.0926091	879
DYS_Pt_0.5	Area	rh_frontalpole	0.0044292	-0.0934796	882
DYS_Pt_0.01	Area	rh_superiortemporal	0.00443821	-0.0898189	882
DYS_Pt_0.1	Volume	rh_rostralmiddlefrontal	0.00445398	-0.0872953	882
DYS_Pt_1	Area	lh_rostralmiddlefrontal	0.00445687	-0.0852244	882
WR_Pt_0.05	Area	lh_superiortemporal	0.00447497	0.0860355	882
WR_Pt_1	Area	lh_inferiortemporal	0.00449915	0.0857826	881
DYS_Pt_0.1	Area	lh_supramarginal	0.00452402	-0.0859149	882
DYS_Pt_1e05	Area	lh_inferiorparietal	0.004558	-0.0882845	882
DYS_Pt_0.5	Area	lh_insula	0.00459299	-0.0861683	882
DYS_Pt_0.05	Area	rh_isthmuscingulate	0.00459561	-0.0889798	882
DYS_Pt_5e05	Area	rh_fusiform	0.00465089	-0.0839468	882
DYS_Pt_0.1	Area	lh_parsopercularis	0.00468015	-0.0921282	879
WR_Pt_1	Thickness	rh_precuneus	0.00472477	-0.0902993	882
DYS_Pt_1e05	Area	rh_insula	0.00475653	-0.0855105	881
DYS_Pt_5e05	Area	rh_middletemporal	0.00479702	-0.0850159	882
DYS_Pt_1e05	Area	lh_lateraloccipital	0.00480104	-0.0843837	882
DYS_Pt_0.5	Area	lh_rostralmiddlefrontal	0.00483711	-0.0844639	882
WR_Pt_0.05	Volume	lh_parsopercularis	0.0048832	0.090334	880
DYS_Pt_0.1	Area	lh_middletemporal	0.00494261	-0.0859194	880
DYS_Pt_0.1	Volume	lh_postcentral	0.00496099	-0.0917808	882
DYS_Pt_0.01	Thickness	rh_rostralmiddlefrontal	0.00498252	0.0948042	881
DYS_Pt_1	Volume	rh_middletemporal	0.00498867	-0.0843	882
DYS_Pt_1	Area	rh_frontalpole	0.00499195	-0.0922045	882
WR_Pt_0.1	Area	rh_medialorbitofrontal	0.00499447	0.0882081	882
DYS_Pt_1	Area	rh_superiortemporal	0.0050002	-0.088272	882
WR_Pt_0.01	Area	lh_superiortemporal	0.00505994	0.0844205	882
DYS_Pt_5e05	Area	rh_rostralmiddlefrontal	0.00507776	-0.0837782	882
SP_Pt_0.001	Volume	lh_postcentral	0.00513463	0.0916363	882
DYS_Pt_1e05	Volume	rh_insula	0.00517288	-0.0848868	881
WR_Pt_0.5	Area	rh_rostralmiddlefrontal	0.00522005	0.0840865	882
WR_Pt_0.1	Thickness	rh_superiorparietal	0.0052356	-0.090734	882
NREP_Pt_5e05	Thickness	rh_lateralorbitofrontal	0.00524756	0.0943699	882
DYS_Pt_0.05	Area	rh_parstriangularis	0.00526761	-0.0898558	882
DYS_Pt_0.05	Volume	rh_superiortemporal	0.00528767	-0.0860792	882
WR_Pt_1	Area	rh_inferiorparietal	0.00529173	0.0839135	881
WR_Pt_0.5	Area	rh_inferiorparietal	0.0054131	0.0837399	881
PA_Pt_5e05	Area	rh_postcentral	0.00542565	0.0874523	880
PA_Pt_5e05	Area	rh_inferiortemporal	0.00546983	0.084788	881
DYS_Pt_0.05	Area	rh_frontalpole	0.00552582	-0.0912753	882
PA_Pt_5e05	Volume	rh_lingual	0.00562033	0.0857767	882
WR_Pt_0.5	Area	lh_inferiortemporal	0.00563961	0.0836386	881
SP_Pt_0.001	Area	lh_postcentral	0.00566086	0.0867062	881
DYS_Pt_1e05	Area	rh_parstriangularis	0.00573134	-0.0888227	882
DYS_Pt_1	Area	lh_insula	0.00580667	-0.0838543	882
DYS_Pt_0.5	Area	lh_parsopercularis	0.00582094	-0.0896358	879
WR_Pt_1	Thickness	rh_superiorfrontal	0.00585006	-0.0885824	882
NREAD_Pt_5e05	Thickness	lh_rostralmiddlefrontal	0.00587562	-0.0917571	882
WR_Pt_0.01	Area	rh_insula	0.00594051	0.0834694	881
SP_Pt_0.05	Area	lh_superiortemporal	0.00601041	0.0830749	882
NREAD_Pt_1	Thickness	rh_superiorparietal	0.00603384	-0.0890999	882
NREP_Pt_0.5	Volume	lh_rostralanteriorcingulate	0.00610419	-0.0872564	882
WR_Pt_1e05	Thickness	lh_bankssts	0.00619968	0.0891878	881
DYS_Pt_0.1	Area	lh_parstriangularis	0.00623488	-0.0889066	882
NREP_Pt_0.05	Area	rh_precentral	0.00624612	-0.083571	882
WR_Pt_0.01	Area	lh_fusiform	0.00625923	0.0822251	882
DYS_Pt_5e08	Volume	lh_insula	0.00637203	-0.0832156	882
DYS_Pt_1e05	Area	rh_fusiform	0.00637506	-0.0808452	882
NREAD_Pt_0.5	Thickness	rh_superiorparietal	0.00639965	-0.0884129	882
DYS_Pt_5e08	Area	lh_parstriangularis	0.00641099	-0.0887778	882
PA_Pt_5e05	Volume	rh_superiorparietal	0.00641865	0.0874115	882
DYS_Pt_0.1	Volume	lh_pericalcarine	0.00642069	-0.0882309	881
DYS_Pt_0.5	Area	rh_superiortemporal	0.00643962	-0.0857097	882
SP_Pt_5e05	Volume	rh_lingual	0.00652212	0.083845	882
DYS_Pt_5e08	Area	rh_insula	0.0065269	-0.0827785	881
WR_Pt_5e05	Thickness	rh_frontalpole	0.00654957	-0.0916413	882
PA_Pt_5e05	Volume	lh_inferiorparietal	0.00655363	0.086718	880
NREAD_Pt_0.05	Thickness	rh_rostralmiddlefrontal	0.00657733	-0.0913809	881
DYS_Pt_0.1	Volume	rh_isthmuscingulate	0.00658268	-0.085963	881
WR_Pt_1e05	Thickness	rh_parahippocampal	0.00658801	0.0898804	882
WR_Pt_0.5	Area	lh_transversetemporal	0.00659757	0.0892332	882
WR_Pt_5e05	Area	rh_temporalpole	0.00660241	-0.0887065	882
NREP_Pt_0.5	Area	rh_precentral	0.00660509	-0.0825568	882
DYS_Pt_5e08	Area	rh_parstriangularis	0.00671279	-0.0875585	882
WR_Pt_1	Area	lh_insula	0.00674994	0.0829414	882
DYS_Pt_0.01	Area	rh_postcentral	0.00680952	-0.0847549	880
WR_Pt_1	Thickness	lh_superiorparietal	0.00681469	-0.0878813	882
WR_Pt_5e05	Thickness	lh_superiorfrontal	0.00692861	-0.0861823	882
WR_Pt_0.01	Area	rh_superiortemporal	0.00697601	0.0849952	882
WR_Pt_0.001	Area	lh_paracentral	0.0070122	0.0866268	882
WR_Pt_1	Area	lh_transversetemporal	0.00703547	0.0884853	882
DYS_Pt_0.05	Area	lh_parstriangularis	0.0070701	-0.0874749	882
DYS_Pt_1	Volume	rh_fusiform	0.00708708	-0.0796926	882
WR_Pt_0.01	Area	lh_transversetemporal	0.00708985	0.0879174	882
WR_Pt_0.5	Thickness	lh_superiorparietal	0.00712393	-0.0874528	882
WR_Pt_0.5	Thickness	lh_supramarginal	0.0072248	-0.0849047	882
DYS_Pt_1e05	Area	rh_superiortemporal	0.0072808	-0.0844002	882
WR_Pt_0.01	Area	rh_paracentral	0.00738393	0.0856121	881
WR_Pt_0.01	Area	lh_insula	0.00738831	0.0815739	882
DYS_Pt_0.05	Volume	rh_postcentral	0.00740269	-0.0871334	882
DYS_Pt_0.001	Thickness	rh_rostralmiddlefrontal	0.0074229	0.0904793	881
DYS_Pt_1e05	Volume	lh_superiortemporal	0.0074477	-0.0809174	881
NREAD_Pt_0.05	Thickness	rh_inferiorparietal	0.00761066	-0.0856437	882
DYS_Pt_0.05	Volume	lh_superiortemporal	0.00765251	-0.0807979	881
DYS_Pt_0.01	Area	lh_precentral	0.00767118	-0.0815589	882
DYS_Pt_0.001	Area	lh_superiortemporal	0.00778454	-0.0804082	882
PA_Pt_0.1	Thickness	lh_insula	0.00783328	0.0859282	882
DYS_Pt_0.1	Volume	lh_superiortemporal	0.00784882	-0.0806145	881
DYS_Pt_0.1	Area	rh_superiorparietal	0.00791246	-0.0821437	882
DYS_Pt_0.5	Volume	rh_fusiform	0.00794815	-0.0785782	882
PA_Pt_0.05	Thickness	lh_insula	0.00797671	0.085375	882
DYS_Pt_1e05	Area	lh_posteriorcingulate	0.00803457	-0.0849145	880
WR_Pt_0.5	Volume	lh_parsopercularis	0.00806464	0.0851449	880
DYS_Pt_5e05	Thickness	rh_posteriorcingulate	0.0081241	0.0861633	881
DYS_Pt_1	Area	rh_bankssts	0.00817457	-0.0845282	881
WR_Pt_0.5	Thickness	rh_superiorfrontal	0.00824253	-0.0849781	882
DYS_Pt_1e05	Area	rh_superiorfrontal	0.00838169	-0.079481	882
DYS_Pt_0.05	Area	lh_lateralorbitofrontal	0.00840703	-0.0811302	882
WR_Pt_5e05	Volume	rh_temporalpole	0.00845717	-0.0874511	882
DYS_Pt_0.1	Thickness	lh_medialorbitofrontal	0.0084713	0.0884966	881
NREAD_Pt_0.5	Area	rh_inferiortemporal	0.00847784	0.0799565	881
WR_Pt_0.05	Area	rh_superiortemporal	0.00848721	0.0833469	882
PA_Pt_5e05	Area	rh_lingual	0.00850591	0.0821563	882
DYS_Pt_0.05	Area	rh_medialorbitofrontal	0.008521	-0.0824048	882
PA_Pt_0.05	Thickness	lh_entorhinal	0.00852116	0.0885545	882
DYS_Pt_0.5	Area	rh_bankssts	0.00852482	-0.084096	881
DYS_Pt_0.05	Volume	rh_isthmuscingulate	0.00855604	-0.0831113	881
WR_Pt_0.01	Area	rh_middletemporal	0.00866313	0.0792165	882
DYS_Pt_0.1	Area	rh_medialorbitofrontal	0.00867066	-0.0822988	882
DYS_Pt_0.1	Area	lh_superiorfrontal	0.00869936	-0.0773956	881
PA_Pt_0.1	Volume	lh_caudalmiddlefrontal	0.00876514	0.0849262	882
WR_Pt_1	Thickness	lh_supramarginal	0.00879802	-0.0827648	882
WR_Pt_0.05	Area	lh_caudalmiddlefrontal	0.00885118	0.0840685	882
NREAD_Pt_0.1	Thickness	rh_rostralmiddlefrontal	0.00889077	-0.0881812	881
DYS_Pt_0.1	Volume	lh_precentral	0.00893051	-0.0825334	882
NREAD_Pt_0.5	Area	rh_caudalmiddlefrontal	0.00895458	0.0848494	882
PA_Pt_5e05	Volume	lh_cuneus	0.00915594	0.0840189	882
DYS_Pt_5e08	Area	lh_lateralorbitofrontal	0.00918392	-0.0804354	882
SP_Pt_0.1	Area	lh_superiortemporal	0.00924355	0.0788999	882
DYS_Pt_0.01	Area	rh_medialorbitofrontal	0.00930144	-0.0816604	882
WR_Pt_0.1	Thickness	lh_supramarginal	0.00936054	-0.0819185	882
DYS_Pt_0.05	Area	lh_superiorfrontal	0.00943862	-0.0765022	881
WR_Pt_0.001	Area	rh_entorhinal	0.00944127	0.0840588	882
PA_Pt_5e05	Volume	lh_pericalcarine	0.0094843	0.084433	881
WR_Pt_1e05	Volume	rh_bankssts	0.00952183	0.0818587	881
NREP_Pt_0.05	Thickness	rh_paracentral	0.00952993	0.0846988	882
NREP_Pt_1e05	Thickness	rh_transversetemporal	0.00955572	-0.0854421	882
DYS_Pt_0.01	Area	lh_supramarginal	0.00962198	-0.0784877	882
DYS_Pt_0.01	Thickness	rh_parsorbitalis	0.0096583	0.0868664	882
DYS_Pt_5e08	Area	lh_fusiform	0.00974956	-0.0779737	882
NREAD_Pt_1	Area	rh_inferiortemporal	0.00990306	0.0783963	881
WR_Pt_0.01	Area	lh_parsopercularis	0.00990386	0.0839453	879
DYS_Pt_5e08	Area	rh_caudalanteriorcingulate	0.010004	-0.0851186	880
WR_Pt_1	Area	rh_rostralmiddlefrontal	0.0100175	0.077509	882
NREAD_Pt_0.05	Volume	lh_superiorparietal	0.010127	-0.0820118	882
WR_Pt_0.5	Area	lh_caudalmiddlefrontal	0.0102358	0.0825512	882
DYS_Pt_5e08	Thickness	lh_caudalanteriorcingulate	0.0102449	0.0867265	881
DYS_Pt_5e08	Area	rh_rostralanteriorcingulate	0.0102693	-0.0829569	881
DYS_Pt_1e05	Volume	rh_transversetemporal	0.0102768	-0.0839627	882
DYS_Pt_0.1	Volume	lh_posteriorcingulate	0.0103067	-0.0821739	880
NREP_Pt_1	Area	rh_precentral	0.0103369	-0.0779842	882
NREAD_Pt_1	Thickness	lh_superiorparietal	0.0103503	-0.0829813	882
PA_Pt_5e05	Volume	lh_superiorfrontal	0.0103589	0.0766752	882
WR_Pt_0.01	Area	rh_caudalmiddlefrontal	0.0104829	0.0830048	882
DYS_Pt_1e05	Area	lh_caudalmiddlefrontal	0.0105352	-0.0815918	882
NREP_Pt_1	Volume	lh_rostralanteriorcingulate	0.0105668	-0.0814029	882
DYS_Pt_5e05	Area	lh_posteriorcingulate	0.0105669	-0.0820061	880
NREAD_Pt_1	Area	rh_caudalmiddlefrontal	0.0106004	0.0830254	882
SP_Pt_5e05	Volume	rh_caudalanteriorcingulate	0.0106448	0.0843377	881
DYS_Pt_0.05	Thickness	lh_parsorbitalis	0.0107054	0.0851715	882
DYS_Pt_1e05	Volume	lh_pericalcarine	0.0108827	-0.0822318	881
NREAD_Pt_0.5	Thickness	lh_superiorparietal	0.0108947	-0.0823489	882
DYS_Pt_1	Area	rh_superiorfrontal	0.0109182	-0.0767581	882
SP_Pt_5e05	Area	lh_parahippocampal	0.010935	-0.081219	880
WR_Pt_0.001	Thickness	lh_temporalpole	0.0109646	-0.0860848	881
DYS_Pt_0.05	Volume	rh_rostralmiddlefrontal	0.0110163	-0.0779907	882
NREP_Pt_0.001	Area	lh_superiortemporal	0.011026	0.0763776	882
WR_Pt_1	Volume	lh_parsopercularis	0.0111074	0.0815706	880
SP_Pt_0.001	Area	lh_lingual	0.0111654	0.0790055	881
DYS_Pt_0.1	Area	lh_lateralorbitofrontal	0.0111784	-0.0781934	882
PA_Pt_5e05	Volume	rh_postcentral	0.0111859	0.083068	882
PA_Pt_1	Area	lh_temporalpole	0.011242	0.0798777	881
WR_Pt_0.001	Volume	rh_temporalpole	0.0112633	-0.0841507	882
DYS_Pt_0.001	Volume	rh_isthmuscingulate	0.0113097	-0.0803109	881
WR_Pt_1	Thickness	lh_superiorfrontal	0.0114144	-0.081347	882
NREAD_Pt_0.01	Area	rh_paracentral	0.0114271	0.0815307	881
PA_Pt_5e05	Volume	rh_cuneus	0.0114563	0.082207	882
NREAD_Pt_1	Area	lh_caudalmiddlefrontal	0.0114585	0.080942	882
WR_Pt_0.05	Thickness	rh_superiorparietal	0.0114686	-0.0823297	882
DYS_Pt_0.05	Volume	lh_fusiform	0.0115355	-0.0759822	882
WR_Pt_0.5	Area	lh_parahippocampal	0.0115481	0.0810045	880
DYS_Pt_0.1	Volume	rh_fusiform	0.0115634	-0.0749448	882
WR_Pt_5e05	Thickness	rh_parstriangularis	0.0116644	-0.0805294	881
NREP_Pt_0.1	Thickness	lh_isthmuscingulate	0.0116992	-0.081895	882
DYS_Pt_5e08	Volume	lh_superiortemporal	0.0117788	-0.0765331	881
DYS_Pt_0.1	Volume	rh_precentral	0.0119265	-0.0782413	882
NREAD_Pt_5e05	Thickness	rh_medialorbitofrontal	0.0120262	-0.0840804	882
DYS_Pt_1e05	Volume	lh_transversetemporal	0.0120604	-0.0823452	882
DYS_Pt_5e05	Area	rh_superiortemporal	0.0121977	-0.0789185	882
PA_Pt_0.1	Area	lh_caudalmiddlefrontal	0.0123382	0.0802663	882
DYS_Pt_0.5	Area	rh_superiorfrontal	0.0123436	-0.0754805	882
NREP_Pt_0.1	Thickness	lh_pericalcarine	0.0124118	0.0830922	881
DYS_Pt_5e05	Area	lh_transversetemporal	0.0124316	-0.0815759	882
SP_Pt_0.001	Area	rh_inferiorparietal	0.0124736	0.0750609	881
WR_Pt_0.01	Area	lh_inferiortemporal	0.0125397	0.0750205	881
DYS_Pt_1e05	Area	rh_middletemporal	0.0126923	-0.0750931	882
WR_Pt_0.5	Area	lh_isthmuscingulate	0.0127795	0.0764926	881
WR_Pt_0.05	Area	lh_transversetemporal	0.0128386	0.081681	882
DYS_Pt_0.1	Thickness	lh_lateralorbitofrontal	0.0128713	0.0828045	882
DYS_Pt_0.5	Area	lh_parstriangularis	0.0129004	-0.0806673	882
PA_Pt_0.01	Area	rh_paracentral	0.0129295	-0.0793945	881
WR_Pt_1	Thickness	rh_inferiortemporal	0.012932	-0.0835468	882
DYS_Pt_0.001	Area	rh_superiortemporal	0.0130335	-0.0784809	882
WR_Pt_5e05	Thickness	lh_parsopercularis	0.013082	-0.0795752	882
DYS_Pt_5e08	Volume	rh_insula	0.0131716	-0.0756424	881
PA_Pt_5e05	Volume	rh_parsorbitalis	0.0131718	0.0802681	882
DYS_Pt_1	Thickness	lh_lateralorbitofrontal	0.013179	0.0823145	882
SP_Pt_0.1	Thickness	lh_insula	0.0132403	0.0802698	882
WR_Pt_0.1	Volume	lh_parsopercularis	0.0134099	0.0792762	880
NREAD_Pt_0.01	Thickness	lh_rostralmiddlefrontal	0.0134316	-0.083012	882
PA_Pt_5e05	Area	lh_superiorparietal	0.0134526	0.077211	882
NREP_Pt_0.001	Area	lh_middletemporal	0.013505	0.0752793	880
NREAD_Pt_0.5	Area	rh_superiortemporal	0.0135575	0.0778839	882
PA_Pt_5e05	Volume	rh_lateraloccipital	0.0135672	0.0780833	882
DYS_Pt_0.05	Volume	lh_precentral	0.0136102	-0.0778257	882
WR_Pt_0.1	Area	lh_caudalmiddlefrontal	0.0136308	0.0791013	882
PA_Pt_0.05	Area	rh_paracentral	0.0136776	-0.0787693	881
NREAD_Pt_0.1	Area	rh_superiortemporal	0.0138154	0.0776094	882
DYS_Pt_0.5	Thickness	lh_lateralorbitofrontal	0.0138912	0.0817115	882
WR_Pt_0.05	Area	lh_isthmuscingulate	0.0141502	0.0753078	881
DYS_Pt_0.1	Volume	lh_rostralmiddlefrontal	0.0141636	-0.0755694	882
WR_Pt_1e05	Area	lh_superiorfrontal	0.0141813	0.0719122	881
SP_Pt_5e05	Area	rh_caudalanteriorcingulate	0.0142109	0.0809021	880
DYS_Pt_5e08	Area	rh_transversetemporal	0.014228	-0.0801118	881
DYS_Pt_5e08	Area	rh_superiortemporal	0.0142983	-0.0774208	882
WR_Pt_0.001	Thickness	lh_paracentral	0.0142997	-0.0789972	882
NREAD_Pt_0.05	Thickness	lh_pericalcarine	0.0143773	-0.0811285	881
DYS_Pt_1	Area	lh_superiorfrontal	0.0144723	-0.0719688	881
DYS_Pt_5e05	Area	lh_lateraloccipital	0.0145113	-0.0732519	882
WR_Pt_1	Area	lh_parahippocampal	0.0145482	0.0783329	880
DYS_Pt_0.05	Area	lh_lingual	0.0146259	-0.0757876	881
DYS_Pt_0.05	Area	lh_postcentral	0.0146846	-0.0762562	881
WR_Pt_0.001	Area	rh_postcentral	0.0147928	0.0760536	880
NREAD_Pt_1	Area	lh_inferiortemporal	0.0148705	0.0733095	881
DYS_Pt_0.1	Area	rh_parstriangularis	0.0149014	-0.0785266	882
WR_Pt_0.5	Thickness	lh_superiorfrontal	0.0149298	-0.0783254	882
DYS_Pt_1	Volume	rh_superiortemporal	0.0149561	-0.0750262	882
DYS_Pt_0.1	Volume	lh_middletemporal	0.0149784	-0.0743488	881
NREAD_Pt_1	Thickness	rh_transversetemporal	0.0150098	-0.0801083	882
DYS_Pt_0.5	Area	lh_lateralorbitofrontal	0.0150474	-0.0747696	882
PA_Pt_5e05	Volume	lh_superiorparietal	0.0150628	0.0781663	882
DYS_Pt_5e08	Area	rh_bankssts	0.015128	-0.0780293	881
PA_Pt_5e05	Volume	lh_fusiform	0.0152564	0.0734458	882
DYS_Pt_1	Area	lh_lateralorbitofrontal	0.0153319	-0.0745431	882
SP_Pt_1e05	Area	lh_parahippocampal	0.0153379	-0.0774315	880
DYS_Pt_0.5	Area	rh_medialorbitofrontal	0.0153693	-0.0758364	882
DYS_Pt_0.1	Area	rh_lateraloccipital	0.0153883	-0.0739167	882
DYS_Pt_0.5	Volume	rh_isthmuscingulate	0.0154225	-0.0764878	881
NREAD_Pt_0.5	Thickness	rh_inferiorparietal	0.0154604	-0.0779537	882
DYS_Pt_0.05	Volume	rh_middletemporal	0.0155219	-0.0728157	882
DYS_Pt_1	Area	lh_parstriangularis	0.0155491	-0.0784762	882
WR_Pt_0.1	Area	rh_parstriangularis	0.0156544	0.0781363	882
WR_Pt_0.001	Area	lh_temporalpole	0.0156746	0.075591	881
DYS_Pt_0.5	Thickness	rh_parsorbitalis	0.0156844	0.0808269	882
DYS_Pt_0.5	Area	rh_lingual	0.0156882	-0.074891	882
DYS_Pt_1	Area	rh_medialorbitofrontal	0.0157036	-0.0755738	882
NREAD_Pt_5e05	Thickness	lh_middletemporal	0.01586	-0.0795937	882
DYS_Pt_0.01	Volume	lh_precentral	0.0159599	-0.0761929	882
DYS_Pt_0.01	Area	lh_lingual	0.0159861	-0.0749629	881
NREP_Pt_1	Thickness	lh_isthmuscingulate	0.0160177	-0.0780463	882
NREP_Pt_0.001	Thickness	lh_isthmuscingulate	0.0160429	-0.0779474	882
NREAD_Pt_0.5	Area	lh_transversetemporal	0.0161934	0.0786284	882
DYS_Pt_0.05	Volume	lh_postcentral	0.0161948	-0.0785211	882
DYS_Pt_0.05	Area	lh_supramarginal	0.0161978	-0.072739	882
DYS_Pt_0.01	Thickness	lh_medialorbitofrontal	0.016208	0.080957	881
DYS_Pt_0.1	Volume	lh_parstriangularis	0.0162603	-0.0768396	882
DYS_Pt_0.5	Area	lh_supramarginal	0.0163031	-0.0725692	882
DYS_Pt_0.5	Volume	rh_superiortemporal	0.0163225	-0.0740667	882
WR_Pt_0.05	Thickness	lh_isthmuscingulate	0.0163365	-0.0783364	882
DYS_Pt_0.01	Volume	rh_superiortemporal	0.0163585	-0.0743146	882
NREP_Pt_0.5	Area	lh_paracentral	0.0164503	-0.077116	882
DYS_Pt_0.001	Area	lh_fusiform	0.0165302	-0.072348	882
PA_Pt_0.05	Thickness	rh_pericalcarine	0.0165512	0.079935	881
DYS_Pt_0.05	Thickness	rh_rostralanteriorcingulate	0.01658	0.0816292	882
DYS_Pt_0.05	Thickness	rh_lateralorbitofrontal	0.0166948	0.0805331	882
DYS_Pt_5e08	Area	lh_transversetemporal	0.0166982	-0.0784011	882
PA_Pt_0.01	Volume	rh_paracentral	0.0167455	-0.0780171	881
NREP_Pt_5e05	Volume	lh_lateraloccipital	0.016749	-0.0742824	882
PA_Pt_0.5	Area	rh_paracentral	0.0168396	-0.0768306	881
DYS_Pt_0.1	Area	lh_inferiorparietal	0.0169376	-0.0745717	882
NREAD_Pt_1	Thickness	rh_inferiorparietal	0.0170502	-0.0768586	882
DYS_Pt_0.1	Area	rh_precuneus	0.0170764	-0.0717797	882
SP_Pt_5e05	Area	rh_lingual	0.0170793	0.0741166	882
NREP_Pt_0.5	Thickness	lh_isthmuscingulate	0.01713	-0.077229	882
NREAD_Pt_0.5	Area	lh_inferiortemporal	0.0171854	0.0716778	881
DYS_Pt_0.5	Area	lh_superiorfrontal	0.0172094	-0.0701343	881
DYS_Pt_5e05	Volume	lh_transversetemporal	0.0172375	-0.0782097	882
WR_Pt_1	Thickness	rh_transversetemporal	0.0172873	-0.0787074	882
DYS_Pt_0.01	Area	lh_postcentral	0.0173055	-0.0745445	881
DYS_Pt_0.5	Area	rh_inferiortemporal	0.0174041	-0.0721112	881
DYS_Pt_5e05	Area	lh_fusiform	0.0174852	-0.0714523	882
DYS_Pt_0.1	Area	rh_caudalmiddlefrontal	0.017499	-0.0771488	882
NREAD_Pt_0.5	Area	lh_caudalmiddlefrontal	0.0175942	0.0759648	882
DYS_Pt_1e05	Area	rh_transversetemporal	0.0176793	-0.0771816	881
DYS_Pt_0.1	Area	lh_precentral	0.0177625	-0.0724465	882
DYS_Pt_5e08	Area	rh_precuneus	0.0177856	-0.0714651	882
NREAD_Pt_1	Thickness	rh_superiorfrontal	0.017829	-0.0759062	882
SP_Pt_0.001	Volume	rh_inferiorparietal	0.0178311	0.0726491	881
PA_Pt_0.5	Area	lh_temporalpole	0.0179	0.074619	881
WR_Pt_1	Thickness	rh_middletemporal	0.0179704	-0.0781394	882
PA_Pt_5e05	Volume	rh_inferiortemporal	0.0179955	0.0738519	881
DYS_Pt_0.01	Volume	lh_posteriorcingulate	0.0180042	-0.0758926	880
DYS_Pt_1	Area	lh_supramarginal	0.0180455	-0.0714262	882
PA_Pt_1e05	Area	lh_temporalpole	0.0180735	-0.0748009	881
DYS_Pt_0.05	Volume	lh_parstriangularis	0.01812	-0.0754967	882
DYS_Pt_0.1	Area	rh_lingual	0.0181249	-0.0734221	882
WR_Pt_0.01	Area	lh_parstriangularis	0.0181517	0.0767631	882
NREAD_Pt_0.05	Thickness	rh_superiorparietal	0.0181519	-0.0764294	882
WR_Pt_0.05	Thickness	lh_precentral	0.0183149	-0.0751378	882
DYS_Pt_5e05	Area	lh_rostralanteriorcingulate	0.0183292	-0.0748636	881
WR_Pt_0.5	Area	lh_superiorfrontal	0.0183502	0.0699649	881
PA_Pt_5e05	Volume	lh_parstriangularis	0.0184325	0.0757645	882
DYS_Pt_5e08	Area	lh_inferiortemporal	0.018567	-0.0709415	881
SP_Pt_0.001	Volume	rh_lateralorbitofrontal	0.0185784	0.0721161	881
WR_Pt_1e05	Area	rh_bankssts	0.0185904	0.074966	881
DYS_Pt_0.05	Area	lh_parsopercularis	0.0186526	-0.0766156	879
NREAD_Pt_0.1	Thickness	rh_inferiorparietal	0.0186777	-0.0756626	882
DYS_Pt_1	Thickness	rh_parsorbitalis	0.0186993	0.07865	882
DYS_Pt_0.001	Thickness	lh_caudalanteriorcingulate	0.0187421	0.0794356	881
NREAD_Pt_1	Thickness	lh_superiortemporal	0.0187837	-0.0737156	882
WR_Pt_0.1	Area	rh_inferiorparietal	0.0187991	0.0705942	881
WR_Pt_0.5	Volume	lh_insula	0.0188751	0.0718942	882
DYS_Pt_1e05	Volume	lh_posteriorcingulate	0.0190651	-0.0749253	880
WR_Pt_0.01	Area	rh_parstriangularis	0.0191887	0.0754682	882
DYS_Pt_1e05	Thickness	lh_frontalpole	0.0191975	0.0792389	882
DYS_Pt_5e08	Volume	rh_parstriangularis	0.0192301	-0.0748724	882
DYS_Pt_1e05	Volume	rh_superiortemporal	0.0195379	-0.0719949	882
WR_Pt_0.01	Area	lh_caudalmiddlefrontal	0.0195576	0.0746311	882
WR_Pt_0.5	Area	rh_medialorbitofrontal	0.0197384	0.073502	882
DYS_Pt_1	Area	rh_lingual	0.0197406	-0.0722516	882
DYS_Pt_0.1	Volume	rh_insula	0.0197486	-0.0710083	881
DYS_Pt_5e05	Volume	rh_insula	0.0197635	-0.0708804	881
DYS_Pt_0.5	Area	rh_isthmuscingulate	0.0198158	-0.0731032	882
WR_Pt_0.5	Thickness	rh_inferiortemporal	0.0198229	-0.0783659	882
DYS_Pt_1	Area	rh_inferiortemporal	0.0200852	-0.0704872	881
NREAD_Pt_0.5	Thickness	lh_superiortemporal	0.0201348	-0.072853	882
WR_Pt_0.5	Area	rh_superiorfrontal	0.0202061	0.0706004	882
NREAD_Pt_1	Thickness	rh_parsopercularis	0.020309	-0.0735927	882
DYS_Pt_1	Area	lh_posteriorcingulate	0.0203913	-0.0743413	880
WR_Pt_0.01	Area	rh_posteriorcingulate	0.0204395	0.0732739	881
WR_Pt_1	Area	lh_isthmuscingulate	0.0205869	0.0711114	881
DYS_Pt_0.5	Area	lh_middletemporal	0.0206393	-0.0706296	880
WR_Pt_0.01	Area	rh_fusiform	0.0206815	0.0687338	882
WR_Pt_0.5	Thickness	lh_inferiorparietal	0.0208597	-0.0736826	882
DYS_Pt_0.1	Thickness	rh_parsorbitalis	0.0208705	0.0774758	882
WR_Pt_5e05	Thickness	lh_precentral	0.0211112	-0.072951	882
DYS_Pt_5e05	Area	rh_caudalmiddlefrontal	0.0211198	-0.0747461	882
NREAD_Pt_0.5	Thickness	rh_superiorfrontal	0.0212184	-0.0737765	882
DYS_Pt_1	Area	lh_middletemporal	0.0212559	-0.0702778	880
WR_Pt_0.5	Thickness	rh_transversetemporal	0.0212737	-0.0761976	882
DYS_Pt_1	Volume	rh_isthmuscingulate	0.0212839	-0.0727087	881
DYS_Pt_0.1	Thickness	lh_parsorbitalis	0.0213805	0.0768965	882
WR_Pt_1	Area	lh_caudalmiddlefrontal	0.0214433	0.0739319	882
WR_Pt_0.001	Thickness	lh_middletemporal	0.0216185	-0.0755756	882
DYS_Pt_1e05	Thickness	lh_caudalanteriorcingulate	0.0216191	0.077274	881
NREAD_Pt_0.5	Area	lh_lateralorbitofrontal	0.021682	0.0707927	882
NREP_Pt_5e05	Thickness	rh_cuneus	0.021698	-0.0768855	879
NREP_Pt_1e05	Volume	rh_parahippocampal	0.0217197	-0.0725892	881
DYS_Pt_0.05	Area	rh_postcentral	0.021778	-0.0717544	880
DYS_Pt_5e08	Volume	lh_transversetemporal	0.0218044	-0.0756083	882
NREAD_Pt_0.5	Area	lh_parsopercularis	0.0218308	0.074764	879
PA_Pt_0.05	Volume	lh_entorhinal	0.0219447	0.0711464	881
WR_Pt_0.1	Thickness	lh_inferiorparietal	0.0219576	-0.0728651	882
DYS_Pt_5e05	Thickness	rh_rostralmiddlefrontal	0.0219746	0.0771502	881
PA_Pt_5e05	Volume	rh_middletemporal	0.0220175	0.0693492	882
NREAD_Pt_1e05	Thickness	rh_medialorbitofrontal	0.0221448	-0.0768762	882
WR_Pt_0.01	Volume	lh_postcentral	0.0223437	0.074615	882
WR_Pt_0.001	Area	lh_fusiform	0.0224467	0.0685563	882
DYS_Pt_1	Area	rh_parstriangularis	0.022467	-0.0734389	882
DYS_Pt_0.05	Area	rh_inferiortemporal	0.0225088	-0.069286	881
NREAD_Pt_0.001	Area	rh_paracentral	0.0225405	0.0729922	881
WR_Pt_0.001	Area	lh_postcentral	0.0227056	0.0710647	881
WR_Pt_0.1	Area	lh_isthmuscingulate	0.0227555	0.0697965	881
WR_Pt_0.01	Area	rh_transversetemporal	0.0228328	0.0741828	881
PA_Pt_5e05	Area	lh_cuneus	0.0228743	0.0721914	881
WR_Pt_1	Thickness	lh_inferiorparietal	0.0229362	-0.0724966	882
WR_Pt_0.5	Area	rh_parstriangularis	0.0229832	0.0737243	882
PA_Pt_5e05	Volume	rh_insula	0.0230612	0.0695998	881
WR_Pt_0.5	Thickness	rh_middletemporal	0.0230634	-0.0750921	882
PA_Pt_0.1	Area	rh_paracentral	0.0230912	-0.0729069	881
NREAD_Pt_5e05	Thickness	rh_rostralmiddlefrontal	0.0231378	-0.0766324	881
WR_Pt_1e05	Area	rh_postcentral	0.0232701	0.070578	880
DYS_Pt_0.05	Thickness	lh_rostralmiddlefrontal	0.0234024	0.075487	882
WR_Pt_1	Area	rh_medialorbitofrontal	0.02351	0.0713795	882
DYS_Pt_1e05	Thickness	rh_lateraloccipital	0.0235552	0.073727	882
DYS_Pt_0.5	Area	lh_pericalcarine	0.0235644	-0.0721769	881
DYS_Pt_0.05	Volume	lh_posteriorcingulate	0.0235896	-0.0724655	880
DYS_Pt_1e05	Area	rh_parahippocampal	0.0236042	-0.0706591	881
PA_Pt_0.05	Volume	rh_paracentral	0.0236095	-0.073832	881
NREP_Pt_1e05	Area	rh_parahippocampal	0.0237102	-0.0709541	881
NREAD_Pt_0.05	Thickness	lh_superiorparietal	0.0237859	-0.0729349	882
DYS_Pt_5e08	Volume	rh_caudalanteriorcingulate	0.0238894	-0.0747415	881
PA_Pt_5e05	Volume	lh_inferiortemporal	0.0239147	0.0694879	880
DYS_Pt_0.05	Volume	rh_insula	0.0239154	-0.0687372	881
NREAD_Pt_1	Area	rh_parahippocampal	0.0239564	0.0707603	881
DYS_Pt_0.05	Volume	rh_parstriangularis	0.0240433	-0.0719688	882
WR_Pt_1	Thickness	lh_superiortemporal	0.0240609	-0.0710515	882
NREAD_Pt_0.5	Thickness	rh_transversetemporal	0.0241107	-0.0742518	882
WR_Pt_0.05	Volume	lh_transversetemporal	0.0242064	0.0744614	882
DYS_Pt_0.5	Area	rh_parstriangularis	0.0243377	-0.0724742	882
WR_Pt_5e05	Thickness	lh_paracentral	0.0243402	-0.0726602	882
DYS_Pt_0.5	Volume	lh_parstriangularis	0.0243907	-0.0718243	882
WR_Pt_0.05	Thickness	rh_inferiorparietal	0.0245425	-0.0726946	882
NREAD_Pt_0.05	Volume	lh_precuneus	0.0245738	-0.068261	881
NREP_Pt_0.1	Area	lh_paracentral	0.0246085	-0.0724776	882
PA_Pt_0.1	Area	lh_temporalpole	0.0246415	0.0707144	881
SP_Pt_1	Thickness	rh_temporalpole	0.0246532	-0.076655	881
WR_Pt_1	Area	rh_superiorfrontal	0.0246799	0.0682547	882
DYS_Pt_0.01	Area	lh_inferiorparietal	0.0246978	-0.0702476	882
NREAD_Pt_0.1	Area	lh_transversetemporal	0.0247262	0.0733901	882
NREP_Pt_0.05	Thickness	lh_paracentral	0.0247327	0.0728456	882
DYS_Pt_0.05	Volume	rh_fusiform	0.0247363	-0.0666054	882
NREP_Pt_0.01	Area	lh_cuneus	0.0247679	-0.0707656	881
DYS_Pt_1e05	Area	lh_parsopercularis	0.0247974	-0.0729708	879
NREAD_Pt_0.5	Area	rh_medialorbitofrontal	0.0248519	0.0703966	882
DYS_Pt_5e08	Volume	rh_fusiform	0.0248905	-0.0667248	882
DYS_Pt_0.5	Volume	rh_insula	0.0249125	-0.0681667	881
WR_Pt_0.1	Thickness	lh_superiorparietal	0.0250131	-0.072682	882
DYS_Pt_0.001	Area	lh_insula	0.0250422	-0.0684842	882
DYS_Pt_0.1	Area	rh_bankssts	0.0250969	-0.0718144	881
DYS_Pt_0.5	Area	lh_posteriorcingulate	0.0251658	-0.0717933	880
DYS_Pt_0.05	Area	lh_inferiorparietal	0.0251942	-0.0698456	882
NREAD_Pt_0.05	Volume	rh_superiorparietal	0.0251964	-0.0712638	882
SP_Pt_5e05	Volume	rh_isthmuscingulate	0.0252619	0.0708354	881
DYS_Pt_0.1	Area	lh_superiorparietal	0.0253038	-0.0695305	882
NREAD_Pt_0.1	Thickness	lh_supramarginal	0.0253137	-0.0703274	882
DYS_Pt_5e05	Thickness	rh_parsorbitalis	0.0253787	0.0748469	882
PA_Pt_0.1	Area	rh_isthmuscingulate	0.0253939	0.0705049	882
PA_Pt_5e05	Volume	lh_entorhinal	0.0255334	0.0698444	881
NREAD_Pt_1	Area	rh_superiortemporal	0.0255547	0.0705142	882
PA_Pt_5e05	Volume	lh_precentral	0.0257741	0.0707869	882
DYS_Pt_0.01	Area	rh_precuneus	0.0258292	-0.0671815	882
DYS_Pt_0.05	Area	lh_precentral	0.0259648	-0.0679997	882
WR_Pt_0.5	Area	rh_lateralorbitofrontal	0.0260095	0.0691713	882
DYS_Pt_0.01	Volume	rh_precentral	0.0260567	-0.0693716	882
PA_Pt_0.001	Area	lh_paracentral	0.0262045	-0.0719113	882
NREP_Pt_1	Area	lh_paracentral	0.0262098	-0.0715058	882
DYS_Pt_1	Area	rh_isthmuscingulate	0.0262239	-0.0697405	882
DYS_Pt_0.05	Thickness	rh_parsorbitalis	0.026247	0.0744693	882
WR_Pt_0.01	Area	rh_rostralmiddlefrontal	0.0263768	0.0665026	882
DYS_Pt_0.1	Volume	rh_lateraloccipital	0.0264413	-0.0698666	882
DYS_Pt_1	Thickness	lh_medialorbitofrontal	0.0265381	0.0744241	881
WR_Pt_5e05	Thickness	lh_rostralmiddlefrontal	0.0265795	-0.0737274	882
DYS_Pt_5e05	Area	lh_inferiorparietal	0.0266357	-0.0691197	882
DYS_Pt_0.05	Area	lh_middletemporal	0.0267162	-0.0677184	880
WR_Pt_1	Thickness	lh_precuneus	0.0271266	-0.0693851	882
DYS_Pt_0.01	Area	rh_frontalpole	0.0271277	-0.0729173	882
WR_Pt_0.01	Thickness	rh_superiorparietal	0.0271435	-0.0716208	882
DYS_Pt_0.05	Thickness	rh_insula	0.0271629	0.0715153	881
NREAD_Pt_1	Area	lh_lateralorbitofrontal	0.0273213	0.0681035	882
DYS_Pt_0.01	Area	rh_lingual	0.0273716	-0.0686554	882
WR_Pt_0.1	Thickness	lh_superiortemporal	0.027437	-0.0693014	882
DYS_Pt_1	Volume	lh_precentral	0.0275897	-0.0694022	882
WR_Pt_0.01	Area	rh_inferiorparietal	0.0276205	0.0659956	881
WR_Pt_5e05	Thickness	rh_insula	0.0277651	-0.0711098	881
PA_Pt_5e05	Area	rh_middletemporal	0.0277697	0.0668577	882
WR_Pt_0.1	Thickness	rh_inferiorparietal	0.0278295	-0.0709954	882
DYS_Pt_1	Volume	lh_inferiorparietal	0.0278727	-0.069657	880
NREAD_Pt_0.1	Area	rh_parstriangularis	0.0279114	0.0708818	882
DYS_Pt_1	Area	lh_inferiorparietal	0.0279424	-0.0684814	882
WR_Pt_0.5	Thickness	lh_superiortemporal	0.0280806	-0.0692064	882
NREAD_Pt_0.001	Area	rh_caudalmiddlefrontal	0.0281055	0.0713108	882
DYS_Pt_0.1	Area	rh_parahippocampal	0.0281132	-0.0687569	881
DYS_Pt_0.01	Volume	lh_superiortemporal	0.0282271	-0.0666653	881
DYS_Pt_0.01	Volume	rh_middletemporal	0.0283095	-0.0661587	882
DYS_Pt_0.1	Volume	rh_precuneus	0.0283492	-0.0666624	882
SP_Pt_0.5	Area	lh_paracentral	0.0283631	-0.071158	882
DYS_Pt_0.5	Volume	lh_inferiorparietal	0.0283969	-0.0694451	880
NREAD_Pt_0.05	Volume	rh_precuneus	0.0285406	-0.0664001	882
NREAD_Pt_0.5	Area	lh_lingual	0.0285809	0.0680509	881
WR_Pt_0.5	Thickness	lh_precuneus	0.0286552	-0.0687507	882
NREAD_Pt_1	Thickness	lh_supramarginal	0.0287885	-0.0688557	882
NREAD_Pt_1	Area	lh_transversetemporal	0.0288874	0.0715207	882
WR_Pt_0.5	Area	rh_frontalpole	0.0289239	0.0723604	882
DYS_Pt_1e05	Area	lh_fusiform	0.02894	-0.0656322	882
DYS_Pt_5e05	Volume	rh_parstriangularis	0.0289484	-0.0696166	882
WR_Pt_0.5	Area	lh_fusiform	0.0289565	0.0661393	882
PA_Pt_0.001	Volume	lh_postcentral	0.0289943	0.0716132	882
WR_Pt_0.5	Area	lh_posteriorcingulate	0.0290108	0.0705289	880
NREP_Pt_0.01	Thickness	lh_temporalpole	0.0290398	-0.0740488	881
NREAD_Pt_0.1	Thickness	rh_superiorparietal	0.0291388	-0.0707394	882
WR_Pt_0.05	Thickness	lh_posteriorcingulate	0.0292564	-0.0722681	879
PA_Pt_5e05	Volume	rh_superiorfrontal	0.0293329	0.0668045	882
NREP_Pt_0.001	Area	rh_middletemporal	0.0293361	0.0656192	882
PA_Pt_5e05	Thickness	lh_fusiform	0.0293784	0.0719584	882
WR_Pt_1	Area	rh_lateralorbitofrontal	0.0294658	0.0676188	882
PA_Pt_5e05	Area	lh_parstriangularis	0.0294928	0.0711876	882
WR_Pt_0.05	Area	lh_inferiortemporal	0.0295195	0.06576	881
NREAD_Pt_0.5	Thickness	rh_parsopercularis	0.0295336	-0.0689816	882
DYS_Pt_5e05	Thickness	lh_rostralmiddlefrontal	0.0295368	0.0724233	882
DYS_Pt_1e05	Area	rh_precentral	0.0295995	-0.066184	882
NREP_Pt_0.05	Area	lh_paracentral	0.0296046	-0.0703375	882
PA_Pt_1e05	Area	lh_superiorparietal	0.0297145	0.0681631	882
NREAD_Pt_0.05	Area	rh_superiorfrontal	0.0297151	0.065578	882
NREAD_Pt_1	Area	rh_medialorbitofrontal	0.029722	0.0682561	882
DYS_Pt_1e05	Volume	rh_precentral	0.0299048	-0.0674187	882
DYS_Pt_1e05	Area	lh_isthmuscingulate	0.029939	-0.0662054	881
WR_Pt_0.5	Area	rh_rostralanteriorcingulate	0.0299551	0.0704341	881
NREAD_Pt_1	Area	lh_parsopercularis	0.0300157	0.0708059	879
WR_Pt_5e05	Thickness	lh_frontalpole	0.0301423	-0.0733863	882
DYS_Pt_1	Volume	lh_posteriorcingulate	0.03015	-0.0693056	880
WR_Pt_1	Area	lh_superiorfrontal	0.0301582	0.0642956	881
WR_Pt_0.1	Area	lh_transversetemporal	0.0302196	0.0710492	882
DYS_Pt_5e05	Thickness	lh_caudalanteriorcingulate	0.030298	0.0729503	881
DYS_Pt_0.01	Area	lh_parahippocampal	0.0303759	-0.0692034	880
WR_Pt_1	Area	rh_parstriangularis	0.0304265	0.0701531	882
DYS_Pt_5e05	Volume	rh_parsopercularis	0.030445	-0.0698008	881
DYS_Pt_0.5	Thickness	rh_insula	0.0305198	0.0699324	881
SP_Pt_5e05	Volume	lh_posteriorcingulate	0.0305468	0.0693264	880
DYS_Pt_0.5	Area	lh_inferiorparietal	0.0306259	-0.0673734	882
DYS_Pt_0.5	Volume	lh_precentral	0.0306376	-0.0681206	882
NREAD_Pt_1	Thickness	rh_precuneus	0.0306585	-0.068893	882
DYS_Pt_0.01	Volume	rh_rostralmiddlefrontal	0.0306682	-0.0664957	882
NREAD_Pt_0.1	Area	rh_paracentral	0.0306715	0.0691286	881
NREAD_Pt_0.05	Volume	rh_paracentral	0.0308995	0.0703222	881
WR_Pt_0.05	Thickness	lh_supramarginal	0.0309728	-0.0681712	882
PA_Pt_0.1	Thickness	rh_pericalcarine	0.0310101	0.0722523	881
PA_Pt_0.1	Volume	rh_parsopercularis	0.0310506	0.0699118	881
WR_Pt_0.1	Area	lh_insula	0.0310848	0.0659185	882
DYS_Pt_0.1	Area	lh_lateraloccipital	0.0311301	-0.0647299	882
DYS_Pt_1e05	Thickness	lh_rostralmiddlefrontal	0.0311403	0.0716592	882
NREP_Pt_1e05	Area	rh_transversetemporal	0.0311982	0.0704244	881
DYS_Pt_0.5	Thickness	lh_frontalpole	0.0312068	0.0729476	882
DYS_Pt_0.01	Volume	lh_postcentral	0.0312075	-0.0705411	882
DYS_Pt_0.1	Volume	rh_superiorparietal	0.0312778	-0.0687576	882
WR_Pt_0.001	Area	lh_superiortemporal	0.0314045	0.0647305	882
NREAD_Pt_0.1	Volume	lh_precuneus	0.0314468	-0.0654586	881
DYS_Pt_1	Thickness	rh_insula	0.0315626	0.0694834	881
NREAD_Pt_0.1	Thickness	lh_superiorparietal	0.0315701	-0.0695144	882
WR_Pt_1	Area	lh_posteriorcingulate	0.0315905	0.0694002	880
DYS_Pt_1	Thickness	lh_frontalpole	0.0316074	0.0727581	882
WR_Pt_5e05	Volume	rh_inferiortemporal	0.0317848	-0.0665115	881
DYS_Pt_1e05	Area	lh_superiorfrontal	0.031789	-0.063209	881
WR_Pt_0.001	Volume	rh_superiortemporal	0.0317949	0.0661871	882
NREAD_Pt_0.05	Area	rh_superiortemporal	0.0318164	0.0675587	882
DYS_Pt_0.5	Volume	lh_pericalcarine	0.0318421	-0.069377	881
NREAD_Pt_1e05	Thickness	lh_precentral	0.031885	0.0683085	882
DYS_Pt_1e05	Area	lh_parstriangularis	0.0318928	-0.0696181	882
NREAD_Pt_0.001	Thickness	rh_parsorbitalis	0.0319459	-0.0719474	882
NREP_Pt_0.5	Area	lh_precentral	0.0319696	-0.065379	882
WR_Pt_1	Volume	lh_insula	0.0320288	0.0656301	882
WR_Pt_0.001	Thickness	lh_caudalanteriorcingulate	0.0320794	-0.0720845	881
NREP_Pt_0.5	Volume	lh_postcentral	0.0324264	-0.0697457	882
WR_Pt_1	Area	rh_rostralanteriorcingulate	0.0325247	0.0693355	881
DYS_Pt_0.1	Volume	lh_supramarginal	0.0325372	-0.0655307	882
DYS_Pt_0.05	Thickness	lh_lingual	0.0325595	0.0673866	882
WR_Pt_5e05	Thickness	lh_parstriangularis	0.0326299	-0.0671287	881
NREAD_Pt_0.1	Thickness	rh_parsopercularis	0.0327161	-0.0676395	882
DYS_Pt_0.5	Thickness	rh_posteriorcingulate	0.0328179	0.0694835	881
DYS_Pt_1	Volume	lh_parstriangularis	0.0328608	-0.0680799	882
DYS_Pt_1e05	Area	lh_pericalcarine	0.0328716	-0.0680017	881
WR_Pt_5e05	Thickness	lh_medialorbitofrontal	0.032881	-0.0715904	881
DYS_Pt_0.01	Area	rh_precentral	0.0328834	-0.0651759	882
PA_Pt_5e05	Volume	rh_precuneus	0.0329264	0.0652021	882
DYS_Pt_0.01	Thickness	rh_insula	0.0329507	0.0692001	881
NREAD_Pt_0.1	Area	rh_medialorbitofrontal	0.0329608	0.0668655	882
DYS_Pt_0.5	Volume	lh_posteriorcingulate	0.0329666	-0.0681872	880
NREAD_Pt_0.1	Area	lh_parsopercularis	0.0329809	0.069476	879
WR_Pt_0.01	Area	lh_superiorfrontal	0.0332037	0.0627955	881
WR_Pt_1	Area	rh_parahippocampal	0.0332462	0.0669698	881
DYS_Pt_0.5	Thickness	lh_medialorbitofrontal	0.0333163	0.0714291	881
PA_Pt_0.05	Area	rh_isthmuscingulate	0.0333339	0.0668501	882
DYS_Pt_1e05	Volume	rh_parstriangularis	0.0333721	-0.0677527	882
DYS_Pt_1e05	Area	lh_transversetemporal	0.0333953	-0.0693928	882
PA_Pt_0.5	Volume	lh_rostralanteriorcingulate	0.0334719	-0.068219	882
NREAD_Pt_0.5	Area	rh_parahippocampal	0.0334866	0.0665988	881
DYS_Pt_0.5	Thickness	rh_lateralorbitofrontal	0.0335072	0.0714632	882
WR_Pt_0.1	Thickness	rh_precuneus	0.0335349	-0.0678583	882
NREAD_Pt_0.1	Area	lh_parstriangularis	0.033554	0.069098	882
WR_Pt_0.001	Volume	rh_pericalcarine	0.0336327	-0.0691361	881
NREAD_Pt_0.05	Area	rh_medialorbitofrontal	0.0336556	0.066466	882
NREAD_Pt_0.5	Thickness	rh_precuneus	0.0337633	-0.0676194	882
DYS_Pt_0.05	Thickness	rh_posteriorcingulate	0.0337857	0.0692017	881
PA_Pt_0.1	Volume	lh_pericalcarine	0.0337873	0.0689513	881
PA_Pt_5e05	Volume	rh_lateralorbitofrontal	0.0339653	0.0651635	881
WR_Pt_1	Thickness	rh_rostralmiddlefrontal	0.0339874	-0.0718748	881
DYS_Pt_5e08	Area	lh_rostralmiddlefrontal	0.0340115	-0.0638795	882
WR_Pt_5e05	Volume	lh_isthmuscingulate	0.0342184	-0.0637978	881
DYS_Pt_0.01	Area	lh_transversetemporal	0.0342829	-0.0693291	882
NREP_Pt_5e05	Area	rh_lateralorbitofrontal	0.034297	-0.0657265	882
DYS_Pt_5e05	Thickness	rh_lateralorbitofrontal	0.0343239	0.0711787	882
DYS_Pt_0.5	Thickness	lh_parsorbitalis	0.0343418	0.0705625	882
DYS_Pt_0.05	Area	lh_pericalcarine	0.0344606	-0.0675135	881
DYS_Pt_0.001	Area	rh_parstriangularis	0.0346134	-0.0683159	882
SP_Pt_1	Volume	rh_temporalpole	0.0347096	-0.0709125	882
WR_Pt_0.5	Area	rh_isthmuscingulate	0.0348988	0.0667034	882
NREP_Pt_0.5	Volume	rh_precentral	0.0348992	-0.0654923	882
DYS_Pt_0.1	Volume	lh_bankssts	0.0350197	-0.0690783	880
WR_Pt_0.1	Thickness	rh_superiorfrontal	0.0350593	-0.0676562	882
DYS_Pt_1	Volume	rh_insula	0.0352288	-0.063997	881
SP_Pt_0.001	Volume	lh_fusiform	0.0352531	0.0635768	882
WR_Pt_0.001	Thickness	rh_parstriangularis	0.0352637	-0.06724	881
WR_Pt_0.1	Area	lh_fusiform	0.035318	0.0635669	882
DYS_Pt_5e08	Area	rh_caudalmiddlefrontal	0.0353281	-0.0684881	882
DYS_Pt_5e05	Volume	lh_posteriorcingulate	0.0353891	-0.0673514	880
WR_Pt_0.5	Area	rh_fusiform	0.0353922	0.0628945	882
NREAD_Pt_1	Thickness	lh_inferiorparietal	0.0354241	-0.0668102	882
DYS_Pt_1	Volume	rh_bankssts	0.0354846	-0.0666904	881
PA_Pt_0.05	Thickness	rh_insula	0.0356755	0.0679891	881
WR_Pt_0.1	Area	lh_posteriorcingulate	0.0357486	0.0676457	880
SP_Pt_0.5	Thickness	rh_temporalpole	0.0357955	-0.0715473	881
DYS_Pt_1	Thickness	rh_posteriorcingulate	0.035846	0.0683102	881
NREP_Pt_0.5	Area	lh_postcentral	0.0358942	-0.0654734	881
SP_Pt_0.05	Volume	lh_bankssts	0.0359631	-0.0689479	880
DYS_Pt_1e05	Volume	lh_temporalpole	0.0360254	-0.0683814	882
NREAD_Pt_0.1	Volume	lh_superiorparietal	0.0360561	-0.067038	882
NREP_Pt_0.5	Area	lh_rostralanteriorcingulate	0.0361509	-0.0664506	881
NREAD_Pt_0.5	Thickness	lh_inferiorparietal	0.0361766	-0.0664936	882
SP_Pt_0.1	Volume	lh_posteriorcingulate	0.0361922	0.0674828	880
DYS_Pt_0.5	Area	rh_superiorparietal	0.0361981	-0.0646891	882
PA_Pt_5e05	Area	rh_insula	0.0363178	0.0639856	881
DYS_Pt_0.5	Volume	rh_rostralmiddlefrontal	0.0363868	-0.064149	882
WR_Pt_0.001	Area	lh_insula	0.0364907	0.0636042	882
WR_Pt_1	Area	rh_frontalpole	0.0365025	0.0692409	882
DYS_Pt_1	Area	lh_pericalcarine	0.0365439	-0.0666504	881
NREAD_Pt_5e05	Thickness	lh_temporalpole	0.0366339	-0.0709785	881
DYS_Pt_5e05	Area	rh_lateraloccipital	0.0366405	-0.0636644	882
SP_Pt_5e05	Area	rh_precentral	0.0370261	0.0636385	882
DYS_Pt_5e05	Area	rh_parsopercularis	0.0370474	-0.0680581	881
PA_Pt_1	Area	rh_paracentral	0.0371313	-0.0670295	881
DYS_Pt_5e05	Volume	rh_superiortemporal	0.0371371	-0.0643423	882
NREAD_Pt_0.001	Area	lh_superiorfrontal	0.0372013	0.0614925	881
PA_Pt_0.1	Volume	rh_paracentral	0.0373859	-0.0681932	881
DYS_Pt_1	Thickness	lh_parsorbitalis	0.0374079	0.0693895	882
DYS_Pt_1e05	Thickness	rh_lateralorbitofrontal	0.0375053	0.0699036	882
SP_Pt_0.1	Area	lh_temporalpole	0.0375215	0.0656495	881
SP_Pt_0.05	Area	rh_caudalmiddlefrontal	0.0376242	0.0677349	882
DYS_Pt_5e08	Area	rh_superiorfrontal	0.0377286	-0.0629785	882
DYS_Pt_0.05	Area	rh_precuneus	0.0378169	-0.0624684	882
DYS_Pt_0.1	Area	lh_parahippocampal	0.0378332	-0.0663	880
NREAD_Pt_0.01	Thickness	lh_superiorparietal	0.0378558	-0.067708	882
DYS_Pt_1e05	Area	rh_medialorbitofrontal	0.0378865	-0.0649683	882
PA_Pt_0.1	Area	lh_posteriorcingulate	0.0379363	0.0669028	880
WR_Pt_0.05	Thickness	rh_caudalmiddlefrontal	0.0379573	-0.0678379	882
NREAD_Pt_0.5	Thickness	lh_supramarginal	0.0379861	-0.0653121	882
DYS_Pt_0.5	Volume	rh_bankssts	0.0380208	-0.0658159	881
DYS_Pt_0.05	Area	rh_bankssts	0.0381647	-0.0664146	881
DYS_Pt_1e05	Volume	lh_isthmuscingulate	0.0382648	-0.0624285	881
DYS_Pt_5e05	Area	lh_parstriangularis	0.0382649	-0.0672953	882
WR_Pt_0.05	Area	rh_caudalmiddlefrontal	0.0382742	0.0675773	882
PA_Pt_5e05	Volume	lh_precuneus	0.038298	0.0634016	881
SP_Pt_0.1	Area	lh_posteriorcingulate	0.0383024	0.0669547	880
DYS_Pt_1	Area	rh_superiorparietal	0.0383059	-0.0639609	882
DYS_Pt_0.1	Volume	rh_inferiortemporal	0.0383507	-0.0643586	881
WR_Pt_0.01	Thickness	lh_posteriorcingulate	0.0383895	-0.0683114	879
PA_Pt_5e05	Volume	rh_precentral	0.0385948	0.0647455	882
DYS_Pt_0.01	Area	rh_caudalmiddlefrontal	0.0386081	-0.0672757	882
DYS_Pt_0.001	Volume	rh_superiortemporal	0.0386145	-0.0640953	882
WR_Pt_0.5	Area	rh_parahippocampal	0.038706	0.0650678	881
NREP_Pt_0.1	Volume	rh_precentral	0.0387869	-0.0643447	882
DYS_Pt_0.05	Thickness	rh_rostralmiddlefrontal	0.0388258	0.0696544	881
WR_Pt_1	Area	rh_isthmuscingulate	0.0389027	0.0652688	882
WR_Pt_0.5	Thickness	rh_rostralmiddlefrontal	0.03895	-0.0700366	881
NREP_Pt_0.05	Area	rh_temporalpole	0.0389534	-0.0678454	882
DYS_Pt_1e05	Area	rh_lateralorbitofrontal	0.0390144	-0.0636509	882
WR_Pt_0.01	Area	lh_precentral	0.0391205	0.0630108	882
NREAD_Pt_0.5	Area	rh_fusiform	0.039137	0.061362	882
NREP_Pt_0.001	Area	rh_bankssts	0.0391381	0.0659194	881
DYS_Pt_0.001	Area	rh_rostralmiddlefrontal	0.0391407	-0.0619734	882
WR_Pt_0.01	Volume	rh_paracentral	0.0392495	0.067287	881
DYS_Pt_0.001	Thickness	lh_lingual	0.0392566	0.0651958	882
WR_Pt_0.01	Volume	lh_inferiortemporal	0.0393639	0.063013	880
NREAD_Pt_1	Area	rh_fusiform	0.0395154	0.0612868	882
SP_Pt_0.001	Volume	rh_postcentral	0.0396591	0.0672126	882
DYS_Pt_0.5	Area	rh_precuneus	0.039772	-0.0617628	882
DYS_Pt_5e08	Thickness	rh_precuneus	0.0397875	0.0656088	882
DYS_Pt_0.1	Volume	lh_inferiorparietal	0.0399152	-0.0652679	880
WR_Pt_0.01	Thickness	rh_inferiorparietal	0.0400288	-0.0660687	882
DYS_Pt_0.01	Area	rh_parstriangularis	0.040058	-0.0663416	882
SP_Pt_0.001	Area	rh_superiorparietal	0.0400769	0.0637004	882
WR_Pt_1	Area	rh_fusiform	0.0402533	0.0612883	882
SP_Pt_0.05	Area	lh_temporalpole	0.0402589	0.0645884	881
NREAD_Pt_0.001	Volume	lh_medialorbitofrontal	0.0403199	0.0644888	882
DYS_Pt_0.01	Volume	lh_bankssts	0.0403883	-0.0672671	880
PA_Pt_0.05	Volume	rh_middletemporal	0.0404541	0.0616579	882
DYS_Pt_5e08	Area	lh_medialorbitofrontal	0.0405144	-0.0644499	881
NREAD_Pt_0.1	Area	rh_caudalmiddlefrontal	0.0405748	0.0664751	882
DYS_Pt_1e05	Area	lh_cuneus	0.0405854	-0.0644529	881
WR_Pt_0.01	Area	lh_isthmuscingulate	0.0405978	0.0625674	881
DYS_Pt_1	Volume	rh_rostralmiddlefrontal	0.0406261	-0.0627498	882
PA_Pt_5e05	Volume	lh_isthmuscingulate	0.0407268	0.0621194	881
DYS_Pt_1	Area	lh_bankssts	0.0407611	-0.0671232	879
PA_Pt_5e05	Area	lh_isthmuscingulate	0.0408079	0.0628912	881
PA_Pt_5e05	Area	lh_lateralorbitofrontal	0.0409052	0.0633855	882
PA_Pt_5e05	Area	rh_cuneus	0.040929	0.0647997	882
DYS_Pt_1	Thickness	rh_lateralorbitofrontal	0.0409697	0.0686928	882
NREP_Pt_5e05	Volume	rh_parahippocampal	0.0409706	-0.0648248	881
DYS_Pt_0.05	Area	lh_parahippocampal	0.0409817	-0.0651817	880
WR_Pt_0.05	Thickness	lh_superiorparietal	0.0410424	-0.06639	882
SP_Pt_5e05	Area	rh_pericalcarine	0.0411141	0.066187	881
DYS_Pt_1e05	Area	rh_caudalmiddlefrontal	0.0411555	-0.0661513	882
DYS_Pt_0.001	Area	rh_fusiform	0.0411591	-0.060864	882
PA_Pt_5e05	Volume	lh_lateralorbitofrontal	0.0411618	0.0625061	882
WR_Pt_0.5	Volume	lh_transversetemporal	0.0412258	0.0675229	882
DYS_Pt_0.5	Volume	rh_precuneus	0.0412365	-0.0619308	882
NREAD_Pt_1	Area	lh_lingual	0.0413383	0.0634712	881
NREAD_Pt_0.1	Volume	rh_precuneus	0.0413406	-0.0620005	882
WR_Pt_0.05	Thickness	lh_inferiorparietal	0.0413744	-0.0650056	882
NREAD_Pt_0.01	Thickness	lh_lingual	0.0413869	-0.0648651	882
DYS_Pt_0.5	Volume	lh_middletemporal	0.04143	-0.0622038	881
NREAD_Pt_0.01	Area	rh_superiorfrontal	0.0415428	0.0621334	882
DYS_Pt_5e08	Area	lh_temporalpole	0.0416171	-0.0640806	881
WR_Pt_0.5	Area	lh_parstriangularis	0.041643	0.0666182	882
WR_Pt_0.5	Area	lh_supramarginal	0.0416977	0.0620135	882
NREAD_Pt_0.1	Thickness	rh_transversetemporal	0.0417138	-0.0670064	882
DYS_Pt_0.01	Volume	rh_insula	0.0418484	-0.0620934	881
NREAD_Pt_0.01	Thickness	rh_superiorparietal	0.0419002	-0.0665329	882
DYS_Pt_5e05	Volume	lh_temporalpole	0.0419052	-0.0664213	882
NREAD_Pt_0.001	Thickness	rh_lateralorbitofrontal	0.0419533	-0.068535	882
WR_Pt_0.05	Area	lh_insula	0.0420001	0.0622923	882
NREAD_Pt_1	Volume	lh_precuneus	0.0421095	-0.0619346	881
DYS_Pt_5e05	Area	rh_transversetemporal	0.0421732	-0.0661987	881
DYS_Pt_1e05	Volume	rh_middletemporal	0.042182	-0.0610583	882
WR_Pt_0.01	Thickness	lh_entorhinal	0.0422284	0.0684631	882
PA_Pt_0.01	Volume	lh_rostralanteriorcingulate	0.0422342	-0.0647904	882
WR_Pt_0.05	Thickness	rh_superiorfrontal	0.042264	-0.0653123	882
NREP_Pt_0.5	Volume	lh_paracentral	0.0422985	-0.0665174	882
WR_Pt_1	Area	lh_fusiform	0.0423572	0.0614501	882
DYS_Pt_0.05	Volume	lh_bankssts	0.0424161	-0.0664425	880
DYS_Pt_1	Volume	lh_parsopercularis	0.0424268	-0.0647693	880
WR_Pt_1	Volume	lh_inferiortemporal	0.0424636	0.0623786	880
NREP_Pt_0.001	Thickness	lh_supramarginal	0.0425364	-0.0636058	882
WR_Pt_0.5	Thickness	lh_precentral	0.0425505	-0.0646841	882
DYS_Pt_0.5	Volume	lh_parsopercularis	0.0426385	-0.0647184	880
PA_Pt_1	Thickness	rh_pericalcarine	0.0428617	0.0679565	881
DYS_Pt_1	Volume	lh_superiortemporal	0.0430073	-0.0612589	881
NREAD_Pt_0.01	Area	rh_parstriangularis	0.0430122	0.0658008	882
SP_Pt_0.001	Area	rh_postcentral	0.043021	0.0635207	880
SP_Pt_0.001	Volume	lh_lateralorbitofrontal	0.0430297	0.0617625	882
WR_Pt_0.05	Area	lh_fusiform	0.0431042	0.0612034	882
WR_Pt_0.1	Thickness	lh_precentral	0.0431369	-0.0643255	882
WR_Pt_0.5	Volume	lh_inferiortemporal	0.0432523	0.0621737	880
PA_Pt_5e05	Area	lh_pericalcarine	0.0434744	0.0648742	881
NREAD_Pt_0.01	Volume	rh_paracentral	0.0434837	0.0664826	881
NREP_Pt_1e05	Volume	lh_lateraloccipital	0.0434889	-0.06258	882
WR_Pt_0.05	Area	rh_parstriangularis	0.0435955	0.0653871	882
DYS_Pt_5e08	Thickness	lh_lateraloccipital	0.0436061	0.0662914	882
DYS_Pt_0.1	Area	lh_caudalmiddlefrontal	0.0436088	-0.0645876	882
PA_Pt_1	Area	lh_posteriorcingulate	0.0436315	0.0651622	880
DYS_Pt_1e05	Area	lh_temporalpole	0.0436371	-0.0631696	881
DYS_Pt_5e08	Volume	rh_superiortemporal	0.0436955	-0.0624979	882
DYS_Pt_5e08	Thickness	lh_rostralanteriorcingulate	0.0437133	0.0678308	881
WR_Pt_0.01	Area	rh_isthmuscingulate	0.0437625	0.0633795	882
SP_Pt_1	Area	lh_paracentral	0.0437851	-0.0655348	882
DYS_Pt_5e05	Thickness	rh_lateraloccipital	0.0437887	0.0657279	882
DYS_Pt_0.01	Thickness	lh_rostralmiddlefrontal	0.0438723	0.0672888	882
DYS_Pt_0.1	Area	lh_bankssts	0.0439008	-0.066283	879
DYS_Pt_0.05	Area	rh_lateraloccipital	0.0439203	-0.061436	882
PA_Pt_0.1	Area	rh_parsopercularis	0.0440826	0.0660586	881
NREP_Pt_0.001	Thickness	rh_rostralanteriorcingulate	0.0440846	-0.0684454	882
WR_Pt_1e05	Volume	rh_inferiorparietal	0.0441301	0.0612218	881
PA_Pt_0.1	Volume	rh_middletemporal	0.0441482	0.0608179	882
NREAD_Pt_0.05	Area	lh_caudalmiddlefrontal	0.0442559	0.0642144	882
DYS_Pt_5e05	Thickness	lh_precuneus	0.0442992	0.0627732	882
WR_Pt_1	Area	lh_parstriangularis	0.0444093	0.0657048	882
WR_Pt_0.05	Volume	rh_medialorbitofrontal	0.0445532	0.0631417	881
WR_Pt_0.1	Area	lh_inferiortemporal	0.0446752	0.0605651	881
DYS_Pt_0.001	Area	rh_insula	0.0447148	-0.0611715	881
WR_Pt_0.5	Area	lh_rostralmiddlefrontal	0.0448453	0.0606521	882
DYS_Pt_0.05	Area	lh_bankssts	0.0449248	-0.0659048	879
DYS_Pt_0.05	Volume	lh_pericalcarine	0.0449302	-0.0649146	881
NREAD_Pt_1	Volume	lh_superiorparietal	0.0449336	-0.06423	882
DYS_Pt_0.01	Volume	lh_insula	0.044937	-0.0611961	882
DYS_Pt_0.01	Volume	rh_superiorfrontal	0.0449374	-0.0612513	882
DYS_Pt_1	Volume	rh_lateraloccipital	0.0449623	-0.062965	882
DYS_Pt_0.05	Volume	lh_rostralmiddlefrontal	0.0450328	-0.061722	882
NREAD_Pt_0.05	Thickness	lh_caudalanteriorcingulate	0.0450992	-0.0674349	881
WR_Pt_1e05	Area	rh_inferiorparietal	0.0451214	0.0597151	881
WR_Pt_0.1	Area	lh_parstriangularis	0.0454412	0.0652473	882
NREP_Pt_1	Thickness	rh_rostralanteriorcingulate	0.0455012	-0.0680646	882
DYS_Pt_0.5	Volume	rh_inferiortemporal	0.0456457	-0.0619805	881
WR_Pt_0.01	Thickness	lh_precentral	0.0456529	-0.0633604	882
DYS_Pt_0.1	Area	rh_precentral	0.0458348	-0.0609299	882
DYS_Pt_5e05	Area	rh_lateralorbitofrontal	0.046012	-0.061594	882
DYS_Pt_1	Volume	lh_lingual	0.0460689	-0.0617293	881
NREAD_Pt_0.5	Volume	rh_caudalmiddlefrontal	0.0460696	0.0652646	882
DYS_Pt_0.5	Volume	rh_lateraloccipital	0.0460763	-0.0626573	882
DYS_Pt_0.01	Area	lh_bankssts	0.0461198	-0.065697	879
NREAD_Pt_0.01	Thickness	rh_pericalcarine	0.0461525	-0.0671402	881
DYS_Pt_5e05	Volume	lh_superiortemporal	0.0461616	-0.0603883	881
PA_Pt_5e05	Volume	lh_lateraloccipital	0.0461739	0.0620007	882
WR_Pt_0.05	Volume	lh_precuneus	0.046289	-0.060943	881
DYS_Pt_0.5	Volume	lh_superiortemporal	0.0463668	-0.0603186	881
SP_Pt_5e05	Area	rh_medialorbitofrontal	0.0463807	-0.0625209	882
NREAD_Pt_0.01	Thickness	rh_lateralorbitofrontal	0.0465308	-0.0675919	882
PA_Pt_1	Volume	lh_posteriorcingulate	0.0465471	0.0640915	880
NREAD_Pt_0.5	Area	rh_superiorfrontal	0.0465695	0.0602226	882
WR_Pt_0.5	Area	lh_lateralorbitofrontal	0.046575	0.0616952	882
NREAD_Pt_1	Thickness	rh_pericalcarine	0.0466877	-0.0665102	881
DYS_Pt_0.01	Volume	lh_supramarginal	0.0468632	-0.06102	882
DYS_Pt_5e08	Volume	lh_inferiortemporal	0.0468975	-0.060936	880
NREAD_Pt_0.5	Area	rh_paracentral	0.0469021	0.0636264	881
PA_Pt_0.01	Thickness	lh_entorhinal	0.0469023	0.066948	882
DYS_Pt_1	Area	rh_precuneus	0.0470697	-0.0596372	882
NREAD_Pt_0.001	Thickness	rh_rostralmiddlefrontal	0.0471839	-0.066976	881
DYS_Pt_1	Area	lh_precentral	0.0472475	-0.0605102	882
DYS_Pt_5e05	Volume	rh_parahippocampal	0.0473302	-0.0625194	881
NREP_Pt_0.1	Thickness	rh_rostralanteriorcingulate	0.0473923	-0.0676567	882
NREP_Pt_1e05	Thickness	rh_lateralorbitofrontal	0.04742	0.0669442	882
DYS_Pt_0.1	Volume	lh_inferiortemporal	0.0475419	-0.0606516	880
DYS_Pt_0.1	Volume	lh_parsopercularis	0.0475876	-0.0633916	880
DYS_Pt_5e08	Thickness	rh_lateraloccipital	0.0476599	0.0648013	882
NREAD_Pt_1e05	Thickness	rh_lateralorbitofrontal	0.0478695	-0.0668958	882
WR_Pt_0.1	Area	rh_rostralanteriorcingulate	0.0478855	0.0640413	881
PA_Pt_0.001	Thickness	lh_fusiform	0.0479527	0.0652034	882
WR_Pt_0.01	Volume	rh_posteriorcingulate	0.0480129	0.0619472	881
WR_Pt_1	Area	rh_transversetemporal	0.0480904	0.0648147	881
WR_Pt_0.1	Area	rh_transversetemporal	0.0481149	0.0646733	881
NREP_Pt_0.01	Volume	rh_parstriangularis	0.0482041	0.063029	882
SP_Pt_0.001	Area	lh_lateralorbitofrontal	0.0482101	0.0610744	882
DYS_Pt_0.01	Area	lh_lateralorbitofrontal	0.0482835	-0.0609935	882
DYS_Pt_1e05	Volume	rh_fusiform	0.0484457	-0.0584539	882
SP_Pt_0.001	Volume	lh_lingual	0.0485943	0.0613204	881
DYS_Pt_5e05	Area	lh_temporalpole	0.0486079	-0.0618068	881
PA_Pt_0.01	Area	lh_frontalpole	0.0486465	-0.0645255	880
DYS_Pt_0.01	Area	lh_rostralanteriorcingulate	0.0486759	-0.0627881	881
PA_Pt_5e05	Volume	rh_inferiorparietal	0.0486933	0.0606601	881
DYS_Pt_1e05	Area	lh_lateralorbitofrontal	0.0487031	-0.0606339	882
WR_Pt_1	Volume	lh_transversetemporal	0.0487533	0.0651591	882
PA_Pt_0.05	Area	lh_caudalanteriorcingulate	0.0488507	-0.0655105	880
NREAD_Pt_1	Thickness	lh_cuneus	0.0489515	-0.0655136	882
WR_Pt_0.5	Thickness	rh_caudalmiddlefrontal	0.0489887	-0.0644245	882
WR_Pt_1	Thickness	lh_precentral	0.049098	-0.0627281	882
WR_Pt_1e05	Thickness	lh_superiorfrontal	0.0491907	-0.0626167	882
NREP_Pt_5e05	Volume	rh_caudalanteriorcingulate	0.049279	-0.0652394	881
DYS_Pt_1	Volume	lh_middletemporal	0.0493008	-0.0599605	881
NREAD_Pt_0.1	Thickness	lh_inferiorparietal	0.0493954	-0.0623341	882
NREP_Pt_1e05	Area	lh_transversetemporal	0.0495658	0.0643719	882
WR_Pt_0.1	Thickness	lh_caudalmiddlefrontal	0.0495932	-0.0641132	881
DYS_Pt_0.1	Area	rh_cuneus	0.0496601	-0.0618997	882
PA_Pt_5e05	Volume	lh_rostralmiddlefrontal	0.049919	0.0607564	882
SP_Pt_0.001	Area	lh_temporalpole	0.0499449	0.061693	881
NREP_Pt_1	Area	lh_precentral	0.0499863	-0.059779	882

## Sheet: Supplementary table 5
Supplementary table 5
Cross-dataset validation of association between PGI and white matter structure in the Generation Scotland cohort.
Note. This table presents the unadjusted associations between PGI for dyslexia and white matter nodal degree across multiple metrics in the Generation Scotland cohort. Structural connectivity matrices were computed using two tractography configurations, CT30 and PT50, and included three edge weight measures: SC, FA, MD. Analyses were conducted separately for each measure using FreeSurfer-derived …
Polygenic score	Measure	ROIs	p_value	beta_std	sample_size
DYS_Pt_1e05	SC_PT50	Left_Putamen	0.000340279	-0.112011	884
DYS_Pt_0.01	FA_CT30	rh_medialorbitofrontal	0.000342657	0.112499	884
DYS_Pt_1	FA_CT30	rh_medialorbitofrontal	0.000446465	0.109913	884
DYS_Pt_5e08	FA_CT30	lh_parahippocampal	0.000459886	-0.115764	884
DYS_Pt_0.5	FA_CT30	rh_medialorbitofrontal	0.00052303	0.108625	884
DYS_Pt_1e05	SC_CT30	rh_isthmuscingulate	0.000553984	-0.115791	884
WR_Pt_0.001	MD_CT30	rh_rostralanteriorcingulate	0.000602998	-0.111601	884
DYS_Pt_5e05	SC_PT50	Left_Putamen	0.000689439	-0.106245	884
SP_Pt_0.1	SC_CT30	lh_lateraloccipital	0.000764885	0.109602	884
NREAD_Pt_0.01	MD_CT30	lh_posteriorcingulate	0.000765756	-0.108115	884
NREAD_Pt_0.01	MD_CT30	Left_Amygdala	0.000768364	-0.111545	884
WR_Pt_0.01	FA_PT50	lh_posteriorcingulate	0.000780731	0.112961	884
PA_Pt_0.01	SC_CT30	rh_inferiorparietal	0.000906683	-0.109982	884
PA_Pt_5e05	SC_PT50	lh_cuneus	0.000910636	0.111571	884
PA_Pt_0.01	MD_CT30	rh_caudalmiddlefrontal	0.000939302	0.107862	884
PA_Pt_0.01	FA_CT30	lh_parstriangularis	0.00102094	-0.102247	884
PA_Pt_0.01	SC_PT50	rh_inferiorparietal	0.00104862	-0.108725	884
SP_Pt_0.1	SC_PT50	lh_lateraloccipital	0.00105105	0.106748	884
PA_Pt_0.01	MD_CT30	Right_Caudate	0.00110808	0.102897	884
PA_Pt_5e05	SC_CT30	lh_cuneus	0.0011467	0.109094	884
WR_Pt_1	SC_PT50	lh_transversetemporal	0.00117524	0.108775	884
WR_Pt_1	SC_CT30	lh_transversetemporal	0.00118476	0.108899	884
PA_Pt_5e05	SC_CT30	lh_fusiform	0.00121288	0.108833	884
WR_Pt_0.5	SC_CT30	lh_transversetemporal	0.00123272	0.108572	884
PA_Pt_0.01	FA_CT30	lh_fusiform	0.0012585	-0.101484	884
PA_Pt_5e05	SC_PT50	lh_fusiform	0.00126	0.108867	884
WR_Pt_1e05	MD_PT50	rh_bankssts	0.00128523	0.1026	884
PA_Pt_0.001	SC_CT30	rh_precentral	0.00131154	-0.106514	884
WR_Pt_0.5	SC_PT50	lh_transversetemporal	0.00131708	0.10774	884
PA_Pt_0.01	SC_CT30	rh_caudalmiddlefrontal	0.00135885	-0.108406	884
PA_Pt_0.001	SC_PT50	rh_precentral	0.00138125	-0.106105	884
WR_Pt_0.01	FA_PT50	rh_precentral	0.00140653	0.107311	884
WR_Pt_1e05	SC_PT50	lh_superiorfrontal	0.00143304	0.100859	884
PA_Pt_0.01	FA_CT30	lh_medialorbitofrontal	0.00144527	-0.0983051	884
NREAD_Pt_0.01	FA_CT30	Right_Hippocampus	0.00146117	0.104955	884
DYS_Pt_5e05	SC_CT30	rh_cuneus	0.00154919	-0.107442	884
SP_Pt_1	SC_CT30	lh_lateraloccipital	0.00156731	0.103287	884
DYS_Pt_0.001	SC_CT30	rh_parahippocampal	0.00159398	-0.104594	884
NREP_Pt_1	MD_PT50	rh_bankssts	0.00161978	-0.100858	884
PA_Pt_0.001	MD_PT50	lh_precentral	0.00170013	0.102909	884
WR_Pt_1e05	SC_CT30	lh_superiorfrontal	0.00170562	0.0992491	884
DYS_Pt_0.1	SC_CT30	rh_parahippocampal	0.00170668	-0.103734	884
WR_Pt_0.001	MD_CT30	lh_parahippocampal	0.00172575	-0.102992	884
PA_Pt_5e05	SC_CT30	Right_Hippocampus	0.00175946	0.102967	884
PA_Pt_0.01	SC_PT50	rh_caudalmiddlefrontal	0.00181492	-0.105165	884
NREP_Pt_0.5	MD_PT50	rh_bankssts	0.00183819	-0.0996465	884
NREAD_Pt_0.01	MD_CT30	lh_inferiortemporal	0.00184977	-0.100079	884
WR_Pt_1e05	SC_CT30	rh_superiorfrontal	0.00186252	0.100419	884
SP_Pt_1	SC_PT50	lh_lateraloccipital	0.00188399	0.101551	884
PA_Pt_0.5	SC_CT30	rh_medialorbitofrontal	0.00190598	-0.10523	884
SP_Pt_0.5	SC_CT30	lh_lateraloccipital	0.00190598	0.10131	884
PA_Pt_0.01	SC_CT30	rh_precentral	0.00190916	-0.102446	884
DYS_Pt_1e05	SC_PT50	rh_isthmuscingulate	0.00191346	-0.104013	884
PA_Pt_0.01	MD_CT30	rh_superiorfrontal	0.00192789	0.0972612	884
PA_Pt_0.01	FA_CT30	lh_insula	0.00193703	-0.101409	884
WR_Pt_1e05	SC_PT50	rh_superiorfrontal	0.00195055	0.100007	884
PA_Pt_0.01	SC_PT50	rh_precentral	0.00195717	-0.102285	884
SP_Pt_0.5	SC_PT50	lh_lateraloccipital	0.00225486	0.0997016	884
NREAD_Pt_0.01	SC_CT30	rh_lateraloccipital	0.00233162	0.101762	884
PA_Pt_0.01	MD_CT30	lh_caudalmiddlefrontal	0.0023751	0.098797	884
WR_Pt_0.001	FA_PT50	rh_bankssts	0.00238338	0.102238	884
DYS_Pt_0.1	SC_PT50	rh_parahippocampal	0.00244447	-0.100165	884
NREAD_Pt_0.1	FA_PT50	rh_paracentral	0.00248463	0.102462	884
PA_Pt_5e05	SC_PT50	Right_Hippocampus	0.00252244	0.0997491	884
PA_Pt_0.01	FA_CT30	lh_inferiortemporal	0.00252563	-0.0972833	884
NREAD_Pt_0.01	SC_PT50	rh_lateraloccipital	0.0025791	0.100868	884
DYS_Pt_1e05	FA_CT30	lh_parahippocampal	0.00264964	-0.0989324	884
DYS_Pt_0.001	SC_PT50	rh_parahippocampal	0.00266392	-0.0995012	884
SP_Pt_0.1	FA_PT50	lh_inferiorparietal	0.00268355	0.098707	884
WR_Pt_0.1	SC_CT30	lh_entorhinal	0.00268533	0.0996129	884
NREAD_Pt_0.01	FA_CT30	lh_parahippocampal	0.00279704	0.0994456	884
NREAD_Pt_0.5	MD_CT30	Left_Amygdala	0.0028001	-0.0985496	884
PA_Pt_0.01	FA_CT30	lh_rostralanteriorcingulate	0.00282258	-0.0970278	884
PA_Pt_0.5	SC_PT50	rh_medialorbitofrontal	0.00284549	-0.101005	884
NREP_Pt_5e05	MD_PT50	lh_caudalmiddlefrontal	0.00306176	0.0989525	884
PA_Pt_0.01	MD_CT30	lh_precentral	0.00306278	0.0953548	884
DYS_Pt_5e05	SC_PT50	rh_cuneus	0.00307321	-0.100579	884
PA_Pt_0.01	FA_CT30	lh_superiortemporal	0.00318353	-0.0965384	884
PA_Pt_1	SC_CT30	rh_medialorbitofrontal	0.00318395	-0.0999983	884
PA_Pt_0.001	FA_CT30	lh_medialorbitofrontal	0.00324651	-0.0912816	884
NREAD_Pt_0.01	MD_PT50	Left_VentralDC	0.0032687	-0.094191	884
PA_Pt_1	FA_PT50	lh_lingual	0.00329434	-0.0965436	884
PA_Pt_0.01	SC_CT30	lh_medialorbitofrontal	0.00336037	-0.0965615	884
NREAD_Pt_0.1	SC_CT30	Left_Thalamus_Proper	0.00344949	0.0939484	884
WR_Pt_0.1	SC_PT50	lh_entorhinal	0.00347161	0.0969008	884
PA_Pt_0.01	MD_CT30	rh_parsopercularis	0.00347518	0.0936786	884
PA_Pt_0.001	FA_PT50	rh_posteriorcingulate	0.00358103	-0.0981508	884
PA_Pt_0.01	SC_PT50	lh_caudalanteriorcingulate	0.00358496	-0.0966708	884
PA_Pt_0.01	MD_CT30	lh_postcentral	0.00358661	0.0967634	884
PA_Pt_0.001	FA_CT30	rh_parstriangularis	0.00359046	-0.0927728	884
DYS_Pt_5e05	SC_PT50	lh_superiortemporal	0.00360754	-0.093773	884
DYS_Pt_1e05	SC_CT30	rh_inferiorparietal	0.00361065	-0.0964134	884
NREAD_Pt_1	MD_CT30	Left_Amygdala	0.00363433	-0.0959722	884
PA_Pt_0.01	FA_PT50	lh_inferiortemporal	0.00363436	-0.097194	884
PA_Pt_0.01	FA_CT30	lh_superiorfrontal	0.00372768	-0.088889	884
NREAD_Pt_0.1	MD_CT30	Left_Amygdala	0.00374303	-0.0955113	884
PA_Pt_0.01	SC_CT30	lh_caudalanteriorcingulate	0.00378383	-0.0966387	884
PA_Pt_0.5	FA_PT50	lh_lingual	0.00385363	-0.0949445	884
NREAD_Pt_0.05	MD_CT30	Left_Amygdala	0.00391712	-0.0947904	884
PA_Pt_1	FA_PT50	lh_parahippocampal	0.00394819	-0.0950792	884
SP_Pt_0.1	SC_CT30	rh_lateraloccipital	0.00400177	0.0959419	884
DYS_Pt_5e05	SC_CT30	lh_superiortemporal	0.00404588	-0.0925189	884
PA_Pt_0.01	MD_PT50	rh_superiorfrontal	0.00405957	0.0912693	884
SP_Pt_0.1	FA_PT50	rh_lateraloccipital	0.00433788	0.0950019	884
NREAD_Pt_0.01	MD_PT50	Left_Pallidum	0.00442623	-0.0895393	884
DYS_Pt_1e05	SC_PT50	rh_inferiorparietal	0.0044551	-0.0943029	884
DYS_Pt_1e05	SC_CT30	rh_cuneus	0.00445956	-0.0964907	884
DYS_Pt_0.05	SC_CT30	lh_insula	0.004504	-0.0956836	884
NREAD_Pt_0.01	FA_PT50	Right_Hippocampus	0.00451983	0.0966159	884
WR_Pt_5e05	FA_PT50	lh_posteriorcingulate	0.00470193	0.0950231	884
PA_Pt_0.001	MD_CT30	lh_postcentral	0.00471943	0.0943143	884
DYS_Pt_0.01	FA_CT30	lh_lateralorbitofrontal	0.00472883	0.0910428	884
PA_Pt_5e05	MD_CT30	lh_postcentral	0.00473044	0.0945029	884
PA_Pt_1	SC_PT50	rh_medialorbitofrontal	0.00473523	-0.0956319	884
PA_Pt_0.01	SC_CT30	Right_Caudate	0.00477023	-0.0873887	884
DYS_Pt_1	SC_CT30	lh_insula	0.00488886	-0.0946491	884
DYS_Pt_1e05	SC_CT30	lh_supramarginal	0.00498622	-0.0927839	884
PA_Pt_0.5	FA_PT50	Left_Amygdala	0.00510803	-0.0954439	884
DYS_Pt_1e05	SC_PT50	rh_lateraloccipital	0.005169	-0.0926279	884
DYS_Pt_1e05	SC_CT30	rh_lateraloccipital	0.00517426	-0.092507	884
NREAD_Pt_0.01	MD_CT30	lh_superiortemporal	0.00518654	-0.0889517	884
NREP_Pt_1e05	MD_PT50	lh_caudalmiddlefrontal	0.0051908	0.0932496	884
NREAD_Pt_0.01	MD_CT30	lh_middletemporal	0.00519146	-0.0897891	884
PA_Pt_0.5	FA_PT50	lh_parahippocampal	0.00519236	-0.0922096	884
PA_Pt_0.01	MD_PT50	lh_precentral	0.00531638	0.091046	884
DYS_Pt_1e05	SC_PT50	lh_isthmuscingulate	0.00541224	-0.0890699	884
NREAD_Pt_0.001	FA_CT30	lh_parahippocampal	0.00543055	0.0917843	884
DYS_Pt_1e05	SC_CT30	rh_insula	0.00544555	-0.0901111	884
WR_Pt_0.05	FA_PT50	lh_posteriorcingulate	0.00546042	0.0940108	884
SP_Pt_0.1	SC_PT50	rh_lateraloccipital	0.00546331	0.0927449	884
NREAD_Pt_0.01	MD_CT30	lh_cuneus	0.00548438	-0.0912868	884
DYS_Pt_1e05	SC_CT30	lh_isthmuscingulate	0.00552638	-0.0890382	884
WR_Pt_0.05	SC_CT30	lh_entorhinal	0.00554703	0.0922117	884
NREAD_Pt_0.01	MD_PT50	Right_VentralDC	0.00555365	-0.0891461	884
DYS_Pt_0.05	SC_PT50	lh_insula	0.00558406	-0.0933658	884
DYS_Pt_1e05	SC_PT50	rh_insula	0.00559367	-0.0897613	884
DYS_Pt_1e05	SC_PT50	lh_supramarginal	0.00563709	-0.0918109	884
DYS_Pt_1	MD_CT30	Right_Pallidum	0.00567257	-0.0900707	884
SP_Pt_0.05	FA_PT50	lh_temporalpole	0.00568619	-0.0939382	884
DYS_Pt_0.1	MD_CT30	Right_Pallidum	0.00580267	-0.0900647	884
NREP_Pt_5e05	FA_PT50	lh_parsopercularis	0.00582365	0.0900424	884
PA_Pt_0.01	SC_PT50	lh_medialorbitofrontal	0.00584032	-0.0909107	884
NREP_Pt_1e05	FA_PT50	rh_posteriorcingulate	0.00595518	0.0926026	884
WR_Pt_0.001	FA_PT50	lh_supramarginal	0.00596147	0.0921926	884
PA_Pt_0.01	MD_CT30	lh_lateraloccipital	0.00600795	0.0893254	884
PA_Pt_0.01	FA_PT50	lh_caudalanteriorcingulate	0.00601401	-0.092441	884
DYS_Pt_0.5	MD_CT30	Right_Pallidum	0.00605944	-0.0893932	884
DYS_Pt_1e05	SC_CT30	rh_lingual	0.00612862	-0.0900436	884
DYS_Pt_1e05	SC_CT30	rh_transversetemporal	0.00612885	-0.0922696	884
DYS_Pt_0.5	MD_PT50	lh_medialorbitofrontal	0.00613305	-0.0912444	884
WR_Pt_0.05	SC_PT50	lh_entorhinal	0.00628385	0.0907653	884
PA_Pt_0.01	FA_CT30	lh_lateralorbitofrontal	0.0063005	-0.0878205	884
NREAD_Pt_0.5	FA_CT30	lh_postcentral	0.00630118	0.0900163	884
PA_Pt_0.01	MD_CT30	Right_Putamen	0.00630815	0.0838874	884
DYS_Pt_0.001	FA_CT30	lh_parahippocampal	0.006317	-0.090354	884
DYS_Pt_0.1	FA_CT30	lh_lateralorbitofrontal	0.00632252	0.0879149	884
DYS_Pt_5e05	SC_CT30	rh_parahippocampal	0.00636327	-0.0901146	884
SP_Pt_1e05	MD_PT50	rh_lateralorbitofrontal	0.00636438	0.0895601	884
DYS_Pt_5e05	SC_CT30	rh_lingual	0.00636864	-0.0897114	884
PA_Pt_0.5	SC_CT30	rh_inferiorparietal	0.00640139	-0.0909851	884
PA_Pt_0.001	MD_CT30	lh_entorhinal	0.00642369	0.0920998	884
NREAD_Pt_0.1	SC_PT50	Left_Thalamus_Proper	0.00643373	0.0877939	884
PA_Pt_0.01	SC_PT50	rh_rostralmiddlefrontal	0.00644164	-0.0903628	884
DYS_Pt_1e05	SC_CT30	lh_cuneus	0.00645836	-0.0907207	884
PA_Pt_0.001	MD_PT50	rh_precentral	0.00647619	0.0886679	884
DYS_Pt_1	SC_PT50	lh_insula	0.00648402	-0.0915725	884
DYS_Pt_0.05	SC_CT30	rh_parahippocampal	0.00649731	-0.0899707	884
PA_Pt_0.01	FA_CT30	Left_Caudate	0.00657759	-0.0837796	884
DYS_Pt_1	MD_PT50	lh_medialorbitofrontal	0.0066214	-0.0903841	884
SP_Pt_0.1	FA_PT50	lh_temporalpole	0.00664981	-0.0923913	884
NREAD_Pt_0.01	MD_PT50	lh_cuneus	0.00666924	-0.0917447	884
DYS_Pt_5e05	SC_PT50	rh_parahippocampal	0.00670179	-0.0895037	884
PA_Pt_0.01	SC_CT30	rh_rostralmiddlefrontal	0.00678035	-0.0897221	884
PA_Pt_0.001	MD_CT30	rh_postcentral	0.006818	0.0894421	884
PA_Pt_0.01	MD_CT30	rh_parstriangularis	0.00686163	0.0840189	884
SP_Pt_0.1	FA_CT30	rh_superiorparietal	0.0068632	0.0877536	884
DYS_Pt_0.1	SC_CT30	lh_insula	0.00690918	-0.0910991	884
DYS_Pt_0.01	FA_CT30	rh_frontalpole	0.00700281	0.0838529	884
NREP_Pt_1e05	FA_PT50	lh_caudalmiddlefrontal	0.00701449	0.0897131	884
PA_Pt_1	MD_CT30	rh_parstriangularis	0.00703241	0.0842433	884
PA_Pt_0.5	SC_PT50	rh_inferiorparietal	0.00708108	-0.0899453	884
DYS_Pt_0.5	SC_CT30	lh_insula	0.00708529	-0.0906042	884
WR_Pt_0.001	SC_CT30	lh_isthmuscingulate	0.00710478	0.0863869	884
DYS_Pt_1e05	SC_PT50	rh_transversetemporal	0.00712718	-0.090331	884
PA_Pt_0.01	MD_CT30	rh_medialorbitofrontal	0.00713026	0.085215	884
PA_Pt_1	SC_CT30	rh_inferiorparietal	0.00744593	-0.0893136	884
DYS_Pt_5e05	SC_PT50	rh_middletemporal	0.00757096	-0.0888062	884
WR_Pt_0.01	FA_CT30	rh_precentral	0.00757097	0.0863154	884
PA_Pt_0.001	SC_CT30	rh_caudalmiddlefrontal	0.00758639	-0.0908453	884
PA_Pt_0.01	MD_CT30	lh_parsopercularis	0.00762753	0.0851344	884
NREAD_Pt_0.05	FA_CT30	rh_postcentral	0.00763468	0.0876338	884
NREP_Pt_1e05	FA_PT50	lh_posteriorcingulate	0.00767777	0.0900506	884
NREAD_Pt_0.001	MD_CT30	Left_Amygdala	0.00769624	-0.087768	884
NREAD_Pt_0.01	MD_CT30	Left_Pallidum	0.00769658	-0.0842443	884
NREP_Pt_1e05	MD_PT50	lh_superiortemporal	0.00783573	0.0844	884
SP_Pt_5e05	SC_CT30	rh_caudalanteriorcingulate	0.00786058	0.0895188	884
PA_Pt_0.5	MD_CT30	rh_parstriangularis	0.00792594	0.0829961	884
DYS_Pt_0.05	FA_CT30	lh_lateralorbitofrontal	0.00792728	0.0854136	884
PA_Pt_0.01	FA_PT50	lh_rostralanteriorcingulate	0.00795828	-0.0884595	884
WR_Pt_1	MD_PT50	Left_Accumbens_area	0.00798625	-0.0901229	884
NREP_Pt_5e05	FA_PT50	lh_caudalmiddlefrontal	0.00819872	0.0881325	884
PA_Pt_0.01	FA_CT30	Left_Putamen	0.00822271	-0.0851894	884
SP_Pt_0.1	SC_CT30	rh_inferiortemporal	0.0082546	0.0902178	884
PA_Pt_0.001	FA_CT30	lh_parstriangularis	0.00828297	-0.0826484	884
PA_Pt_1	FA_PT50	Left_Amygdala	0.0083102	-0.0899797	884
PA_Pt_1	SC_PT50	rh_inferiorparietal	0.00839099	-0.0880452	884
DYS_Pt_0.01	SC_PT50	lh_transversetemporal	0.00840716	-0.08813	884
WR_Pt_5e05	FA_PT50	rh_bankssts	0.0084375	0.0887344	884
SP_Pt_0.1	FA_CT30	rh_precuneus	0.00846809	0.0849632	884
SP_Pt_0.1	SC_PT50	rh_medialorbitofrontal	0.00857619	-0.0890832	884
PA_Pt_0.01	MD_CT30	rh_frontalpole	0.0085922	0.0848923	884
WR_Pt_0.1	SC_CT30	lh_transversetemporal	0.0085926	0.0881519	884
DYS_Pt_1e05	SC_PT50	lh_superiortemporal	0.00864585	-0.0845576	884
NREAD_Pt_0.01	MD_CT30	lh_parahippocampal	0.0086737	-0.0872647	884
NREAD_Pt_0.05	FA_PT50	rh_paracentral	0.00869931	0.088683	884
SP_Pt_0.5	FA_PT50	lh_temporalpole	0.0087037	-0.0894584	884
SP_Pt_5e05	SC_PT50	rh_caudalanteriorcingulate	0.00875303	0.0875067	884
WR_Pt_0.5	MD_PT50	Left_Accumbens_area	0.00883305	-0.0890077	884
DYS_Pt_0.5	SC_PT50	lh_insula	0.00894318	-0.0879751	884
DYS_Pt_0.001	FA_CT30	lh_lateralorbitofrontal	0.00894889	0.0843407	884
WR_Pt_0.001	FA_CT30	lh_supramarginal	0.00895025	0.085623	884
NREAD_Pt_0.01	MD_CT30	rh_posteriorcingulate	0.00897536	-0.0827967	884
SP_Pt_5e05	FA_CT30	Left_Amygdala	0.00898851	-0.0873834	884
WR_Pt_0.01	FA_CT30	rh_postcentral	0.00900354	0.0858656	884
DYS_Pt_5e05	SC_CT30	rh_isthmuscingulate	0.00904813	-0.0877336	884
DYS_Pt_5e05	SC_PT50	rh_lingual	0.00914574	-0.0857195	884
PA_Pt_0.01	SC_CT30	lh_precentral	0.00916801	-0.0859351	884
SP_Pt_0.5	MD_PT50	lh_parahippocampal	0.00918644	-0.0885263	884
SP_Pt_0.5	MD_PT50	lh_temporalpole	0.00919344	-0.0874813	884
WR_Pt_0.001	SC_PT50	lh_isthmuscingulate	0.00924031	0.0833733	884
DYS_Pt_0.5	FA_PT50	Right_VentralDC	0.00927752	0.0869475	884
DYS_Pt_0.05	SC_PT50	rh_parahippocampal	0.00928337	-0.0859698	884
SP_Pt_1e05	FA_PT50	rh_lateralorbitofrontal	0.0093278	0.0860991	884
DYS_Pt_0.01	FA_PT50	Right_Putamen	0.00938345	0.0861515	884
WR_Pt_0.5	MD_CT30	lh_paracentral	0.00939104	-0.0850357	884
PA_Pt_0.01	SC_CT30	Right_Accumbens_area	0.00946351	-0.0866958	884
PA_Pt_0.1	MD_PT50	rh_parstriangularis	0.00950722	0.084988	884
DYS_Pt_1	FA_PT50	Right_VentralDC	0.0095083	0.086645	884
PA_Pt_0.01	FA_PT50	lh_superiorfrontal	0.00954996	-0.0820245	884
NREAD_Pt_1	FA_CT30	lh_postcentral	0.00955754	0.085473	884
PA_Pt_0.01	MD_CT30	lh_entorhinal	0.0095636	0.0871937	884
SP_Pt_0.05	SC_CT30	rh_lateraloccipital	0.0095926	0.0862043	884
PA_Pt_0.1	MD_CT30	rh_frontalpole	0.00966226	0.083952	884
DYS_Pt_0.1	SC_PT50	lh_insula	0.00968434	-0.0872644	884
WR_Pt_1	MD_CT30	lh_paracentral	0.00973227	-0.0845951	884
SP_Pt_1	MD_PT50	lh_temporalpole	0.00980951	-0.086831	884
PA_Pt_0.01	MD_PT50	rh_precentral	0.0100974	0.0834217	884
DYS_Pt_0.01	SC_CT30	lh_transversetemporal	0.0101889	-0.0860927	884
PA_Pt_0.001	SC_PT50	rh_caudalmiddlefrontal	0.010273	-0.0870046	884
SP_Pt_0.05	SC_CT30	Left_VentralDC	0.0102789	0.0864778	884
DYS_Pt_1e05	SC_PT50	rh_lingual	0.0102863	-0.0843158	884
PA_Pt_0.01	SC_PT50	Right_Caudate	0.01035	-0.0796612	884
WR_Pt_0.5	SC_CT30	Right_Putamen	0.0103819	0.0824279	884
SP_Pt_1	FA_CT30	rh_precuneus	0.0104535	0.0828514	884
DYS_Pt_0.1	SC_PT50	lh_medialorbitofrontal	0.0104793	-0.0845649	884
DYS_Pt_1e05	SC_CT30	lh_superiortemporal	0.0106418	-0.0821757	884
WR_Pt_5e05	FA_PT50	rh_posteriorcingulate	0.0106704	0.0856043	884
SP_Pt_1e05	MD_CT30	lh_caudalanteriorcingulate	0.0106865	0.0813171	884
DYS_Pt_1e05	SC_CT30	Left_VentralDC	0.010725	-0.0855042	884
PA_Pt_0.01	SC_PT50	lh_precentral	0.0107346	-0.0842312	884
SP_Pt_0.01	FA_PT50	Right_Hippocampus	0.0107562	0.0863408	884
WR_Pt_0.01	FA_CT30	rh_caudalmiddlefrontal	0.0107984	0.0831077	884
SP_Pt_0.5	MD_CT30	lh_parahippocampal	0.0108125	-0.0846224	884
DYS_Pt_0.5	SC_PT50	Left_Hippocampus	0.0108442	-0.0821259	884
DYS_Pt_1	MD_CT30	Left_Accumbens_area	0.0108445	-0.0848483	884
WR_Pt_0.1	SC_PT50	lh_transversetemporal	0.0108951	0.0852607	884
NREP_Pt_0.001	SC_CT30	rh_middletemporal	0.0109173	0.0843978	884
WR_Pt_0.001	FA_CT30	rh_bankssts	0.0111441	0.0848543	884
NREAD_Pt_0.01	MD_CT30	rh_superiortemporal	0.0111995	-0.0818864	884
WR_Pt_1e05	SC_PT50	Left_Pallidum	0.0112913	0.0839297	884
NREAD_Pt_0.5	SC_CT30	Left_Thalamus_Proper	0.0113217	0.0814851	884
PA_Pt_0.001	SC_CT30	rh_superiorfrontal	0.0113298	-0.0825821	884
NREP_Pt_0.01	FA_PT50	lh_isthmuscingulate	0.0114026	0.0848069	884
[truncated: 1,070 more rows]

## Sheet: Supplementary table 6
Supplementary table 6
[truncated: 22 more rows]

## Sheet: Supplementary table 7
Supplementary table 7
[truncated: 44 more rows]

[truncated: 1 more sheets: Supplementary table8]
